# Supplementary material for: Genome-wide meta-analyses of cross substance use disorders in European, African, and Latino ancestry populations
Source: Research Square preprint supplement (doi:10.21203/rs.3.rs-3955955/v1), 2024-07-16
Supplement: Supplementary file 1 [file 8011dd43ac33232aff783fa7.xlsx]

## Sheet: Descriptions of Suppl Tables
S1	Genetic correlations among different SUDs in EA
S2	Genome-wide significant variants in EA
S3	Genome-wide significant variants in AA
S4	Genome-wide significant variants in LA
S5	Genome-wide significant variants in AA_EA
S6	Genome-wide significant variants in EA_LA
S7	Genome-wide significant variants in AA_EA_LA
S8	Protein changing variants not genome-wide significant but in high LD (r2>0.6) with a lead variant
S9	EA gene-based results
S10	AA gene-based results
S11	LA gene-based results
S12	AA_EA gene-based results
S13	EA_LA gene-based results
S14	AA_EA_LA gene-based results
S15	Mapped genes in EA
S16	Mapped genes in LA
S17	Mapped genes in AA_EA
S18	Mapped genes in EA_LA
S19	Mapped genes in AA_EA_LA
S20	Prioritized genes
S21	Enrichment analysis results of highly expressed genes in brain dissections
S22	Enrichment analysis results of lowly expressed genes in brain dissections
S23	Enrichment analysis results of highly expressed genes in brain cell types
S24	Enrichment analysis results of lowly expressed genes in brain cell types
S25	Heritability estimation and heritabily explained
S26	Genetic correlations with other traits in EA
S27	Drugs and their target genes identified
S28	Description of Clinformatics data

## Sheet: S1.rG
Trait1	Trait2	rG	SE	Z	P
PAU	OUD	0.6962	0.0418	16.6371	3.7508e-62
PAU	CUD	0.635	0.0442	14.3627	8.8684e-47
PAU	NUD	0.5216	0.0465	11.206	3.8105e-29
OUD	CUD	0.6532	0.0584	11.1806	5.0726e-29
OUD	NUD	0.4798	0.0695	6.9003	5.1887e-12
CUD	NUD	0.5811	0.0631	9.2103	3.2519e-20

## Sheet: S2.EA.sig.SNPs
Locus	rsID	chr	pos	non_Effect_Allele	Effect_allele	1KG.EUR.MAF	Meta.P	Meta.beta	AUD.P	OUD.P	CUD.P	TUD.P	Finngen.SUD.P	Func.ensGene	Gene.ensGene	GeneDetail.ensGene	ExonicFunc.ensGene	AAChange.ensGene	independent
1	rs4654362	1	28829700	C	T	0.3101	2.451e-08	5.577	0.006136	0.001113	0.03982	0.02695	0.000476947	intergenic	PHACTR4;RCC1	dist=2824;dist=2755	.	.
1	rs4654363	1	28830901	G	A	0.3101	2.233e-08	5.593	0.005381	0.001136	0.04228	0.02487	0.000476947	intergenic	PHACTR4;RCC1	dist=4025;dist=1554	.	.	y
1	rs4233254	1	29168054	C	T	0.2932	1.833e-08	5.627	0.01066	0.008249	0.01034	0.0841	5.2453e-06	intronic	OPRD1	.	.	.	y
1	rs4654323	1	29168957	G	T	0.2932	3.617e-08	5.509	0.01298	0.006388	0.01408	0.08802	4.89384e-06	intronic	OPRD1	.	.	.
2	rs6588169	1	66335318	C	T	0.1759	1.495e-08	5.662	0.0003328	0.01147	0.003532	0.06044	0.00153169	intronic	PDE4B	.	.	.	y
2	rs12064884	1	66364651	G	A	0.4831	1.586e-09	6.035	0.00622	0.1514	3.635e-05	0.1128	0.000143668	intronic	PDE4B	.	.	.
2	rs12751173	1	66364734	C	T	0.4831	1.522e-09	-6.042	0.005973	0.1419	3.695e-05	0.1122	0.000143239	intronic	PDE4B	.	.	.	y
2	rs12066442	1	66365791	C	A	0.4831	4.046e-09	5.882	0.00589	0.1385	3.095e-05	0.1078	0.000144641	intronic	PDE4B	.	.	.
2	rs6588174	1	66367191	G	T	0.4821	4.683e-09	5.858	0.005251	0.1357	2.764e-05	0.1034	0.000164055	intronic	PDE4B	.	.	.
2	rs11208765	1	66372089	C	A	0.4821	5.249e-09	5.839	0.005132	0.1426	2.887e-05	0.11	0.000163866	intronic	PDE4B	.	.	.
2	rs11208766	1	66372906	G	A	0.4831	4.317e-09	-5.872	0.005632	0.1614	2.902e-05	0.09587	0.000142321	intronic	PDE4B	.	.	.
2	rs4329483	1	66374004	G	A	0.4831	6.938e-09	-5.792	0.005917	0.1689	2.848e-05	0.1342	0.000134834	intronic	PDE4B	.	.	.
2	rs12068439	1	66375548	C	T	0.4831	4.256e-09	5.874	0.006244	0.1815	2.424e-05	0.09788	0.000141423	intronic	PDE4B	.	.	.
2	rs11208769	1	66380392	C	T	0.495	1.344e-08	-5.68	0.00544	0.2354	5.265e-05	0.125	0.000141277	intronic	PDE4B	.	.	.
2	rs2310752	1	66392405	G	A	0.4284	4.571e-12	-6.918	0.0004497	0.01026	3.945e-06	0.02507	8.4713e-05	intronic	PDE4B	.	.	.
2	rs35185259	1	66393985	C	T	0.2435	3.391e-09	-5.911	0.07275	0.004103	9.964e-05	0.00532	0.00075631	intronic	PDE4B	.	.	.
2	rs12737722	1	66397284	C	T	0.2435	6.12e-09	-5.813	0.07153	0.003643	9.388e-05	0.004775	0.000755527	intronic	PDE4B	.	.	.
2	rs28842268	1	66398861	G	A	0.2435	8.232e-09	-5.764	0.07433	0.003614	8.561e-05	0.004082	0.000751484	intronic	PDE4B	.	.	.
2	rs4255357	1	66399895	G	A	0.4702	3.222e-12	6.968	0.001301	0.01869	9.707e-06	0.02959	6.0986e-07	intronic	PDE4B	.	.	.
2	rs35021135	1	66400197	G	A	0.2435	4.576e-09	-5.862	0.07638	0.003693	0.0001071	0.004602	0.000744183	intronic	PDE4B	.	.	.
2	rs11585651	1	66401440	C	T	0.3549	3.258e-10	6.286	2.457e-05	0.0392	0.0007255	0.04311	6.73752e-05	intronic	PDE4B	.	.	.
2	rs12058296	1	66402424	C	A	0.336	9.24e-10	-6.122	0.02206	0.01516	0.000126	0.02008	2.85621e-05	intronic	PDE4B	.	.	.
2	rs2310754	1	66403092	G	A	0.4702	1.483e-11	6.75	0.0006921	0.06654	7.283e-06	0.04177	5.56557e-07	intronic	PDE4B	.	.	.
2	rs4503327	1	66406807	C	T	0.3549	1.177e-08	5.703	8.772e-06	0.1017	0.0003603	0.0455	6.40944e-05	intronic	PDE4B	.	.	.
2	rs7528604	1	66407352	G	A	0.4304	8.999e-14	-7.455	7.426e-09	0.04329	1.055e-05	0.01979	0.000106319	intronic	PDE4B	.	.	.
2	rs7550837	1	66407396	G	A	0.2624	2.11e-11	6.698	3.828e-08	0.01172	0.000504	0.008994	0.00179875	intronic	PDE4B	.	.	.
2	rs12088813	1	66407700	C	A	0.2624	1.51e-11	6.747	4.577e-08	0.01155	0.0004868	0.007873	0.00124386	intronic	PDE4B	.	.	.
2	rs4554696	1	66408011	C	T	0.3549	1.123e-09	-6.091	1.003e-05	0.1038	0.000337	0.03968	6.46532e-05	intronic	PDE4B	.	.	.
2	rs4255359	1	66408019	G	A	0.2435	8.878e-13	-7.147	1.925e-07	0.008236	0.0001422	0.003276	0.00070089	intronic	PDE4B	.	.	.
2	rs12730848	1	66408646	C	T	0.2634	6.635e-12	-6.865	3.175e-08	0.01188	0.0004603	0.009309	0.00157645	intronic	PDE4B	.	.	.
2	rs11208774	1	66410109	C	T	0.4692	3.513e-13	7.273	0.0006865	0.05879	7.597e-06	0.03539	5.39424e-07	intronic	PDE4B	.	.	.
2	rs11208775	1	66410541	C	T	0.4702	3.241e-13	7.284	0.0006748	0.0649	7.094e-06	0.03478	5.37316e-07	intronic	PDE4B	.	.	.
2	rs3009872	1	66411400	C	T	0.4314	2.401e-13	7.324	6.046e-09	0.04542	1.167e-05	0.02351	8.24461e-05	intronic	PDE4B	.	.	.
2	rs7527901	1	66412760	C	T	0.3559	2.625e-09	-5.954	9.877e-06	0.09117	0.0004699	0.04795	8.67821e-05	intronic	PDE4B	.	.	.
2	rs6690101	1	66414039	C	T	0.4682	2.998e-15	-7.891	9.932e-09	0.04224	7.517e-06	0.08324	6.14851e-07	intronic	PDE4B	.	.	.	y
2	rs6680334	1	66414440	G	T	0.3539	3.14e-08	-5.533	4.668e-06	0.1402	0.0005625	0.0765	7.22404e-05	intronic	PDE4B	.	.	.
2	rs12729364	1	66415035	G	A	0.2714	1.725e-08	5.638	0.01844	0.01184	0.0009761	0.01933	0.00404036	intronic	PDE4B	.	.	.
2	rs10889590	1	66415481	G	A	0.3569	9.794e-10	-6.113	8.935e-06	0.128	0.0004894	0.07788	8.48457e-05	intronic	PDE4B	.	.	.
2	rs1937458	1	66416309	C	T	0.3569	8.247e-10	-6.14	3.284e-06	0.1305	0.0004693	0.07625	8.48985e-05	intronic	PDE4B	.	.	.
2	rs1937456	1	66416747	C	T	0.3569	1.119e-09	-6.091	3.389e-06	0.1281	0.0004482	0.0879	8.51962e-05	intronic	PDE4B	.	.	.
2	rs1937455	1	66416939	G	A	0.4324	1.755e-12	7.053	4.336e-10	0.04632	1.316e-05	0.0508	0.00016995	intronic	PDE4B	.	.	.
2	rs7547416	1	66419087	G	A	0.4314	6.936e-13	7.181	3.452e-10	0.05072	1.285e-05	0.03994	0.000162424	intronic	PDE4B	.	.	.
2	rs2997088	1	66419142	C	A	0.3569	4.377e-10	6.24	2.482e-06	0.1408	0.0005026	0.06059	8.43956e-05	intronic	PDE4B	.	.	.
2	rs6421482	1	66419905	G	A	0.4314	2.011e-13	-7.348	2.699e-10	0.04964	1.221e-05	0.05146	0.000162619	intronic	PDE4B	.	.	.
2	rs17417915	1	66421606	C	A	0.2893	1.186e-11	6.782	9.104e-09	0.02228	0.003577	0.02892	0.000210722	intronic	PDE4B	.	.	.
2	rs61799396	1	66422444	C	T	0.2475	9.049e-13	-7.144	1.396e-07	0.006179	0.0001578	0.00854	0.000723136	intronic	PDE4B	.	.	.
2	rs78353223	1	66422459	C	A	0.2475	9.439e-13	-7.138	1.509e-07	0.00627	0.0001537	0.008603	0.000724369	intronic	PDE4B	.	.	.
2	rs35698460	1	66424749	C	T	0.2475	3.951e-12	6.939	1.011e-07	0.006276	0.0001776	0.007272	0.00072242	intronic	PDE4B	.	.	.
2	rs7551853	1	66425253	C	A	0.2475	4.055e-12	-6.935	1.079e-07	0.00625	0.0001724	0.007441	0.000722171	intronic	PDE4B	.	.	.
2	rs10789205	1	66426100	C	T	0.3569	1.6e-09	-6.034	2.705e-06	0.106	0.0005433	0.06701	8.16206e-05	intronic	PDE4B	.	.	.
2	rs12760902	1	66426251	C	T	0.2893	1.555e-11	-6.743	1.042e-08	0.02257	0.004008	0.03128	0.000210547	intronic	PDE4B	.	.	.
2	rs4638095	1	66426350	G	A	0.3569	1.911e-09	-6.005	2.749e-06	0.1218	0.0004996	0.07036	8.33144e-05	intronic	PDE4B	.	.	.
2	rs12743648	1	66428502	G	T	0.2475	1.905e-13	-7.355	5.892e-08	0.006157	0.0001881	0.007662	0.000723769	intronic	PDE4B	.	.	.	y
2	rs12062815	1	66428569	G	A	0.3559	2.642e-10	6.318	1.72e-06	0.09565	0.0005215	0.06338	8.33336e-05	intronic	PDE4B	.	.	.
2	rs12062901	1	66428788	C	A	0.3569	3.948e-10	6.256	2.661e-06	0.1164	0.0005036	0.07139	8.33336e-05	intronic	PDE4B	.	.	.
2	rs7513141	1	66432913	G	A	0.3579	8.802e-10	6.13	3.747e-06	0.1198	0.0004563	0.07048	8.33125e-05	intronic	PDE4B	.	.	.
2	rs7519259	1	66434743	G	A	0.4702	6.453e-14	7.499	1.702e-09	0.0254	1.237e-05	0.1046	1.24025e-06	intronic	PDE4B	.	.	.
2	rs2186123	1	66435842	G	A	0.3569	7.399e-10	6.157	4.96e-06	0.1226	0.0005153	0.07311	8.42093e-05	intronic	PDE4B	.	.	.
2	rs6691929	1	66435953	G	A	0.2893	3.792e-11	6.612	3.247e-08	0.02408	0.00448	0.03058	0.000208238	intronic	PDE4B	.	.	.
2	rs1937441	1	66437733	G	A	0.2883	3.102e-10	6.294	2.684e-08	0.02483	0.006729	0.03988	0.000220049	intronic	PDE4B	.	.	.
2	rs2503207	1	66438655	G	A	0.3569	5.342e-09	5.836	7.522e-06	0.1246	0.0008433	0.104	8.88608e-05	intronic	PDE4B	.	.	.
2	rs1937439	1	66439127	C	A	0.2883	7.944e-09	5.77	1.378e-08	0.02403	0.005513	0.0378	0.00022007	intronic	PDE4B	.	.	.
2	rs2310819	1	66440096	C	T	0.4692	1.983e-11	6.707	2.539e-09	0.02104	1.78e-05	0.1051	1.0492e-06	intronic	PDE4B	.	.	.
2	rs1937436	1	66441329	G	A	0.2883	2.874e-10	-6.305	1.907e-08	0.024	0.007204	0.04166	0.000218801	intronic	PDE4B	.	.	.
2	rs12738832	1	66441357	C	T	0.2465	4.769e-12	6.912	1.309e-07	0.006715	0.0004333	0.0097	0.000751606	intronic	PDE4B	.	.	.
2	rs1937434	1	66441795	G	T	0.3569	1.393e-09	6.056	6.584e-06	0.1245	0.0008979	0.1107	8.83527e-05	intronic	PDE4B	.	.	.
2	rs61799435	1	66441965	C	T	0.2465	8.259e-12	-6.834	8.523e-08	0.006592	0.0004243	0.009186	0.000751606	intronic	PDE4B	.	.	.
2	rs2503201	1	66442025	C	T	0.3569	1.523e-09	-6.042	8.692e-06	0.1248	0.0008625	0.108	8.83527e-05	intronic	PDE4B	.	.	.
2	rs10889591	1	66442338	C	T	0.3569	1.562e-09	6.038	9.443e-06	0.1248	0.0008507	0.1072	8.83548e-05	intronic	PDE4B	.	.	.
2	rs2503199	1	66444017	C	T	0.3569	7.926e-09	5.77	7.866e-06	0.1299	0.0008593	0.107	8.83873e-05	intronic	PDE4B	.	.	.
2	rs2503197	1	66444649	G	A	0.3569	7.676e-09	5.775	7.378e-06	0.1303	0.0008438	0.1077	8.84199e-05	intronic	PDE4B	.	.	.
2	rs12564578	1	66445516	G	A	0.2883	4.179e-11	-6.598	1.588e-08	0.02433	0.007144	0.04773	0.000219099	intronic	PDE4B	.	.	.
2	rs6684069	1	66445858	G	A	0.3569	9.1e-10	6.124	6.585e-06	0.01937	0.0008827	0.1055	9.07904e-05	intronic	PDE4B	.	.	.
2	rs1937457	1	66446787	C	T	0.2883	3.448e-10	-6.277	1.844e-08	0.02433	0.006887	0.05281	0.000219099	intronic	PDE4B	.	.	.
2	rs6690398	1	66447394	G	A	0.4314	5.134e-13	7.222	5.168e-10	0.03876	1.506e-05	0.07462	0.000134329	intronic	PDE4B	.	.	.
2	rs2503196	1	66447523	G	T	0.3569	2.139e-10	-6.351	5.482e-06	0.01887	0.0009106	0.1107	6.86483e-05	intronic	PDE4B	.	.	.
2	rs2096406	1	66448005	C	T	0.2883	4.045e-11	6.602	1.853e-08	0.00524	0.006351	0.05335	0.000219063	intronic	PDE4B	.	.	.
2	rs2489918	1	66448695	C	T	0.3559	2.192e-10	6.347	5.475e-06	0.01737	0.0009297	0.115	7.11132e-05	intronic	PDE4B	.	.	.	y
2	rs2503194	1	66449215	G	A	0.2883	1.92e-10	6.368	1.887e-08	0.005456	0.006435	0.05038	0.000219063	intronic	PDE4B	.	.	.
2	rs12732753	1	66449249	C	A	0.2465	2.918e-09	5.936	0.06104	0.007573	0.0003557	0.009332	0.000751969	intronic	PDE4B	.	.	.
2	rs35528758	1	66450051	C	T	0.2883	1.516e-10	6.404	1.932e-08	0.02391	0.006735	0.04809	0.000219109	intronic	PDE4B	.	.	.
2	rs12749570	1	66452494	C	T	0.2883	1.851e-10	-6.373	1.29e-08	0.02384	0.007264	0.04549	0.000208305	intronic	PDE4B	.	.	.
2	rs2186120	1	66453163	G	A	0.4702	1.701e-11	6.73	0.0005136	0.03474	1.389e-05	0.1192	8.19898e-07	intronic	PDE4B	.	.	.
2	rs59255680	1	66453384	C	T	0.2883	6.562e-10	6.176	1.266e-06	0.005334	0.007252	0.04569	0.000219104	intronic	PDE4B	.	.	.
2	rs5023204	1	66453835	C	T	0.2883	1.215e-09	6.078	1.308e-06	0.005504	0.007301	0.03877	0.000219215	intronic	PDE4B	.	.	.
2	rs6664582	1	66460947	C	T	0.2465	4.079e-08	5.487	0.04577	0.007407	0.000486	0.009318	0.000753772	intronic	PDE4B	.	.	.
2	rs2503185	1	66461401	G	A	0.4702	5.227e-12	6.899	0.0003925	0.05527	1.662e-05	0.1407	8.09655e-07	intronic	PDE4B	.	.	.
2	rs1937444	1	66463920	C	A	0.2674	2.984e-08	-5.542	0.006843	0.0122	0.0005391	0.02267	0.00166364	intronic	PDE4B	.	.	.
2	rs10493393	1	66465678	G	A	0.2664	3.931e-08	5.494	0.007423	0.01171	0.0006039	0.0257	0.00166249	intronic	PDE4B	.	.	.
2	rs61799585	1	66467331	C	A	0.2465	1e-08	-5.731	0.03348	0.0129	0.0002197	0.009404	0.000727043	intronic	PDE4B	.	.	.
2	rs61799586	1	66467535	G	A	0.2465	9.134e-09	5.746	0.03327	0.01362	0.0001987	0.009303	0.000726675	intronic	PDE4B	.	.	.
2	rs7534143	1	66470379	G	T	0.4612	1.155e-12	-7.111	0.0004394	0.07957	6.186e-06	0.08605	8.96066e-07	intronic	PDE4B	.	.	.
2	rs7522876	1	66470915	G	T	0.2664	3.798e-08	-5.5	0.01005	0.01439	0.0004833	0.02383	0.00166848	intronic	PDE4B	.	.	.
2	rs2489907	1	66473921	C	T	0.2674	3.694e-08	-5.505	0.008773	0.0174	0.0005262	0.02312	0.00165982	intronic	PDE4B	.	.	.
2	rs35297113	1	66476062	C	T	0.2465	2.939e-09	5.935	0.04537	0.01607	0.0001828	0.006673	0.000836835	intronic	PDE4B	.	.	.
2	rs61796569	1	66476437	C	T	0.2664	3.035e-08	-5.539	0.01075	0.01518	0.0004563	0.01947	0.00162514	intronic	PDE4B	.	.	.
2	rs1937450	1	66478840	G	T	0.4602	7.581e-11	-6.509	0.0004048	0.03387	1.11e-05	0.1011	1.5106e-06	intronic	PDE4B	.	.	.
2	rs7525758	1	66494755	G	A	0.337	8.167e-09	5.765	1.18e-05	0.06417	0.00485	0.03598	0.00158114	intronic	PDE4B	.	.	.
2	rs7525943	1	66494981	G	A	0.2843	1.149e-08	5.707	0.0002418	0.01209	0.001613	0.03764	0.00197943	intronic	PDE4B	.	.	.
2	rs35833618	1	66495271	G	A	0.2863	1.259e-08	-5.692	0.0002195	0.01504	0.002379	0.03648	0.00153222	intronic	PDE4B	.	.	.
2	rs12757542	1	66496108	G	A	0.2843	1.686e-08	5.641	0.000223	0.01218	0.001334	0.03302	0.00130903	intronic	PDE4B	.	.	.
2	rs2455032	1	66496139	G	T	0.3708	1.289e-09	-6.069	8.426e-06	0.01831	0.06632	0.1129	2.85167e-05	intronic	PDE4B	.	.	.	y
2	rs12123415	1	66496545	G	T	0.4642	1.617e-13	7.377	1.383e-08	0.02162	0.0005714	0.06871	2.07291e-06	intronic	PDE4B	.	.	.
2	rs11577275	1	66497062	G	A	0.2843	2.189e-08	-5.596	0.0002218	0.009885	0.001539	0.03526	0.0015282	intronic	PDE4B	.	.	.
2	rs11581168	1	66497440	G	A	0.2843	2.149e-08	5.6	0.0002141	0.009971	0.001496	0.0355	0.00157406	intronic	PDE4B	.	.	.
2	rs1354063	1	66503517	C	T	0.4632	1.37e-13	-7.399	8.061e-09	0.0055	0.0004601	0.08865	1.75299e-06	intronic	PDE4B	.	.	.
2	rs1937430	1	66505117	G	A	0.4632	1.061e-13	-7.433	9.901e-09	0.005868	0.0005409	0.08687	1.70353e-06	intronic	PDE4B	.	.	.
2	rs1392812	1	66507087	G	A	0.4622	7.272e-14	7.483	1.045e-08	0.005713	0.0003657	0.08613	1.67205e-06	intronic	PDE4B	.	.	.
2	rs2228693	1	66509014	C	A	0.4483	6.619e-13	-7.187	2.09e-08	0.009911	0.0005651	0.1015	5.20212e-06	ncRNA_intronic	PDE4B-AS1	.	.	.
2	rs2228692	1	66509114	C	A	0.2843	4.875e-08	5.456	0.0002396	0.1077	0.001758	0.03447	0.0015283	ncRNA_intronic	PDE4B-AS1	.	.	.
2	rs11208787	1	66509772	G	A	0.4483	6.805e-13	7.183	2.071e-08	0.01098	0.0004974	0.1047	5.15632e-06	ncRNA_intronic	PDE4B-AS1	.	.	.
2	rs7546256	1	66509948	C	T	0.2843	4.922e-08	5.454	0.0002389	0.1054	0.001747	0.03601	0.00153073	ncRNA_intronic	PDE4B-AS1	.	.	.
2	rs1354060	1	66511404	G	A	0.4483	1.251e-12	-7.1	2.51e-08	0.01321	0.0005691	0.1266	4.67498e-06	ncRNA_intronic	PDE4B-AS1	.	.	.
2	rs12742079	1	66514481	C	T	0.2843	3.693e-08	5.505	0.0002585	0.1045	0.0012	0.03702	0.00153073	ncRNA_intronic	PDE4B-AS1	.	.	.
2	rs11583733	1	66514559	G	A	0.2843	3.791e-08	-5.5	0.0002454	0.1042	0.001173	0.04023	0.00153073	ncRNA_intronic	PDE4B-AS1	.	.	.
2	rs1392810	1	66516139	C	T	0.2843	2.05e-09	-5.994	0.0001758	0.007077	0.00107	0.04082	0.00157576	ncRNA_intronic	PDE4B-AS1	.	.	.
2	rs1500950	1	66522271	G	A	0.4473	1.127e-09	6.09	0.0009675	0.02365	0.0003213	0.1084	5.10434e-06	intronic	PDE4B	.	.	.
2	rs2202061	1	66523826	G	A	0.4473	1.224e-09	-6.077	0.0009477	0.02516	0.0003205	0.1164	4.93026e-06	intronic	PDE4B	.	.	.
2	rs6588183	1	66524258	C	A	0.4473	1.279e-09	6.07	0.0009531	0.02462	0.0003028	0.1223	5.10434e-06	intronic	PDE4B	.	.	.
2	rs11208792	1	66525111	C	T	0.4612	9.147e-10	-6.124	0.0009671	0.02647	0.0003063	0.1026	1.55142e-06	intronic	PDE4B	.	.	.
2	rs1500961	1	66530369	G	A	0.4453	4.082e-09	5.881	0.0009481	0.02974	0.0003471	0.09715	5.10434e-06	intronic	PDE4B	.	.	.
2	rs1392820	1	66533859	G	A	0.4453	4.161e-09	5.878	0.0008896	0.02204	0.0003517	0.1038	5.11058e-06	intronic	PDE4B	.	.	.
2	rs1392819	1	66534149	C	A	0.4592	6.679e-11	6.528	0.0008684	0.02138	0.0002394	0.09399	1.49087e-06	intronic	PDE4B	.	.	.
2	rs1500959	1	66538030	G	A	0.4453	2.089e-09	5.991	0.001009	0.02436	0.0003929	0.09764	5.10434e-06	intronic	PDE4B	.	.	.
2	rs7552924	1	66538408	G	A	0.4592	1.167e-09	-6.085	0.001386	0.02918	0.0003769	0.1047	1.56257e-06	intronic	PDE4B	.	.	.
3	rs11210201	1	73766431	G	T	0.4205	3.848e-09	5.891	9.151e-07	0.008485	0.01403	0.01112	0.00734074	intergenic	RN7SKP19;LINC01360	dist=108893;dist=4861	.	.
3	rs12128495	1	73767587	C	T	0.4205	3.571e-09	5.903	9.375e-07	0.008646	0.0137	0.01043	0.00706496	intergenic	RN7SKP19;LINC01360	dist=110049;dist=3705	.	.
3	rs12129573	1	73768366	C	A	0.3966	1.678e-09	6.026	1.752e-06	0.003043	0.008355	0.01613	0.00575997	intergenic	RN7SKP19;LINC01360	dist=110828;dist=2926	.	.
3	rs12145429	1	73769279	G	A	0.4205	3.226e-09	5.92	8.87e-07	0.008712	0.01316	0.009855	0.00707473	intergenic	RN7SKP19;LINC01360	dist=111741;dist=2013	.	.
3	rs12145432	1	73769330	G	T	0.4205	3.379e-09	5.912	8.235e-07	0.008609	0.01354	0.01069	0.00705862	intergenic	RN7SKP19;LINC01360	dist=111792;dist=1962	.	.
3	rs1923201	1	73771457	G	A	0.4205	3.174e-09	5.922	1.049e-06	0.008081	0.01301	0.009601	0.00705879	ncRNA_exonic	LINC01360	.	.	.
3	rs1923202	1	73771528	G	A	0.4205	3.316e-09	5.915	1.161e-06	0.008072	0.01301	0.009573	0.00705667	ncRNA_exonic	LINC01360	.	.	.
3	rs9425118	1	73771766	C	T	0.4205	3.22e-09	5.92	9.928e-07	0.008162	0.01297	0.01003	0.0070596	ncRNA_exonic	LINC01360	.	.	.
3	rs1475061	1	73772981	C	A	0.4205	2.629e-09	5.953	9.863e-07	0.007846	0.05047	0.01469	0.00706269	ncRNA_exonic	LINC01360	.	.	.
3	rs4593766	1	73773043	C	T	0.4195	4.813e-09	5.854	9.937e-07	0.007934	0.01296	0.01036	0.00706074	ncRNA_exonic	LINC01360	.	.	.
3	rs6424545	1	73773048	C	T	0.4195	4.735e-09	5.856	9.799e-07	0.007833	0.01296	0.01036	0.00706025	ncRNA_exonic;splicing	LINC01360;LINC01360	ENST00000440762.5_1:exon2:c.301+2C>T	.	.
3	rs1475062	1	73773189	G	A	0.4205	4.664e-09	-5.859	9.96e-07	0.00784	0.01269	0.01031	0.00705862	ncRNA_exonic	LINC01360	.	.	.
3	rs1475063	1	73773255	G	A	0.4205	4.708e-09	5.857	1.022e-06	0.00784	0.01273	0.01024	0.00706057	ncRNA_exonic	LINC01360	.	.	.
3	rs11210203	1	73775513	G	A	0.4205	1.582e-09	6.036	1.117e-06	0.007805	0.01294	0.01015	0.00706074	ncRNA_intronic	LINC01360	.	.	.
3	rs6424546	1	73776673	G	A	0.4205	1.531e-09	-6.041	1.033e-06	0.007776	0.01207	0.01069	0.0073619	ncRNA_exonic	LINC01360	.	.	.
3	rs6424548	1	73776850	C	A	0.4205	1.632e-09	6.031	1.171e-06	0.007818	0.01299	0.01016	0.00707897	ncRNA_intronic	LINC01360	.	.	.
3	rs11210205	1	73778100	C	T	0.4205	1.569e-09	-6.037	1.29e-06	0.007884	0.01215	0.009823	0.00707457	ncRNA_intronic	LINC01360	.	.	.
3	rs12061680	1	73778378	G	A	0.4205	1.531e-09	-6.041	1.179e-06	0.007838	0.01214	0.01013	0.00706464	ncRNA_intronic	LINC01360	.	.	.
3	rs11210207	1	73782938	C	T	0.4205	1.58e-09	-6.036	1.065e-06	0.008347	0.0114	0.01165	0.00679955	ncRNA_intronic	LINC01360	.	.	.
3	rs7517355	1	73784077	G	A	0.4215	4.034e-09	5.883	1.154e-06	0.009779	0.01213	0.01134	0.00679235	ncRNA_intronic	LINC01360	.	.	.
3	rs7528322	1	73784686	G	A	0.4205	3.474e-09	-5.907	1.25e-06	0.008105	0.0118	0.01121	0.00678891	ncRNA_intronic	LINC01360	.	.	.
3	rs10732841	1	73786858	G	T	0.4205	3.635e-09	-5.9	1.201e-06	0.007997	0.0117	0.01243	0.00677392	ncRNA_intronic	LINC01360	.	.	.
3	rs2340398	1	73788694	C	T	0.4215	3.598e-09	5.902	1.075e-06	0.009229	0.01204	0.01095	0.00678907	ncRNA_intronic	LINC01360	.	.	.
3	rs10890032	1	73789324	C	T	0.3966	7.951e-10	6.146	2e-06	0.003346	0.007345	0.01647	0.00559332	ncRNA_intronic	LINC01360	.	.	.
3	rs11210209	1	73793245	G	A	0.4215	1.585e-09	-6.035	8.89e-07	0.009326	0.01166	0.01132	0.00677407	ncRNA_intronic	LINC01360	.	.	.
3	rs1885246	1	73793499	C	T	0.4215	1.343e-09	6.062	1.071e-06	0.007765	0.01027	0.01125	0.00700761	ncRNA_intronic	LINC01360	.	.	.
3	rs1885247	1	73793630	G	A	0.4215	1.626e-09	6.031	1.22e-06	0.007693	0.01198	0.01142	0.00678907	ncRNA_intronic	LINC01360	.	.	.
3	rs10890033	1	73796794	G	A	0.4205	1.21e-09	6.079	9.735e-07	0.008203	0.01152	0.01179	0.00679	ncRNA_intronic	LINC01360	.	.	.
3	rs1923206	1	73799968	G	T	0.4215	1.342e-09	-6.062	9.203e-07	0.009711	0.01233	0.01082	0.00673023	ncRNA_intronic	LINC01360	.	.	.
3	rs6684973	1	73801632	G	A	0.3966	1.015e-09	6.107	3.275e-06	0.002765	0.006932	0.01513	0.00563703	ncRNA_exonic	LINC01360	.	.	.
3	rs1923207	1	73803542	G	A	0.4205	1.047e-09	-6.102	8.307e-07	0.008828	0.0116	0.0102	0.00663804	ncRNA_exonic	LINC01360	.	.	.
3	rs1120979	1	73804712	C	T	0.4215	2.336e-08	-5.585	4.633e-07	0.007906	0.02804	0.1229	0.0067911	ncRNA_intronic	LINC01360	.	.	.
3	rs1120981	1	73805179	C	T	0.4215	1.097e-09	-6.095	1.014e-06	0.007906	0.01164	0.01052	0.00679141	ncRNA_intronic	LINC01360	.	.	.
3	rs6689226	1	73806923	C	T	0.4225	1.412e-09	6.054	9.418e-07	0.009464	0.01216	0.0117	0.00679016	ncRNA_intronic	LINC01360	.	.	.
3	rs2208565	1	73810229	G	A	0.4215	9.192e-10	-6.123	8.396e-07	0.007966	0.01028	0.01086	0.00679219	ncRNA_intronic	LINC01360	.	.	.
3	rs2208566	1	73810422	G	A	0.4215	5.089e-09	5.844	8.992e-07	0.331	0.01062	0.01107	0.00678891	ncRNA_intronic	LINC01360	.	.	.
3	rs1951361	1	73811954	G	A	0.4215	7.041e-10	-6.165	9.747e-07	0.005852	0.01074	0.009412	0.00679157	ncRNA_intronic	LINC01360	.	.	.
3	rs1923211	1	73814908	C	T	0.4215	7.787e-10	6.149	7.439e-07	0.00774	0.01034	0.009868	0.00674373	ncRNA_intronic	LINC01360	.	.	.
3	rs1923212	1	73814973	C	A	0.4215	7.651e-10	6.152	7.447e-07	0.007733	0.01017	0.009872	0.00672853	ncRNA_intronic	LINC01360	.	.	.
3	rs1160682	1	73816564	C	T	0.3966	3.567e-10	-6.272	1.483e-06	0.002774	0.006173	0.01566	0.00588342	ncRNA_intronic	LINC01360	.	.	.	y
3	rs6668602	1	73817816	G	A	0.4215	8.017e-10	-6.145	7.387e-07	0.007952	0.01007	0.009858	0.00706757	ncRNA_intronic	LINC01360	.	.	.
3	rs10493516	1	73818516	G	A	0.4215	7.88e-10	6.147	6.927e-07	0.007752	0.01053	0.009777	0.00706155	ncRNA_intronic	LINC01360	.	.	.
3	rs35913332	1	73818741	GA	G	0.4215	4.736e-08	5.461	3.043e-07	0.3419	0.1212	0.2352	0.00706155	ncRNA_intronic	RP4-598G3.1	LINC01360	.	.
3	rs2180946	1	73819848	G	A	0.4215	7.03e-10	-6.165	6.994e-07	0.007493	0.009556	0.009826	0.00705862	ncRNA_intronic	LINC01360	.	.	.
3	rs2340399	1	73821093	C	T	0.4215	6.785e-10	6.171	7.251e-07	0.007293	0.009558	0.009485	0.00705879	downstream	LINC01360	dist=159	.	.
3	rs2340400	1	73821281	C	T	0.4235	1.045e-09	6.102	7.166e-07	0.00528	0.009429	0.0195	0.00790205	downstream	LINC01360	dist=347	.	.
3	rs6655995	1	73821577	C	A	0.4215	6.767e-10	-6.171	8.125e-07	0.007148	0.009092	0.009564	0.00705407	downstream	LINC01360	dist=643	.	.
3	rs6673702	1	73821779	G	T	0.4215	7.141e-10	6.163	7.312e-07	0.007399	0.009903	0.009498	0.00705407	downstream	LINC01360	dist=845	.	.
3	rs10890034	1	73824279	G	A	0.4215	7.396e-10	-6.157	6.975e-07	0.00779	0.009413	0.009866	0.00734311	intergenic	LINC01360;LINC02238	dist=3345;dist=276620	.	.
3	rs10789369	1	73824909	G	A	0.4205	6.614e-10	6.175	7.367e-07	0.006303	0.00979	0.01026	0.00705489	intergenic	LINC01360;LINC02238	dist=3975;dist=275990	.	.
3	rs6681595	1	73827012	G	T	0.4215	6.251e-10	-6.184	6.345e-07	0.007177	0.00936	0.009677	0.00705326	intergenic	LINC01360;LINC02238	dist=6078;dist=273887	.	.
3	rs10890035	1	73828271	G	A	0.4215	6.269e-10	6.184	9.018e-07	0.005801	0.00997	0.009114	0.00705326	intergenic	LINC01360;LINC02238	dist=7337;dist=272628	.	.
3	rs7541529	1	73828831	G	T	0.4205	6.867e-10	-6.169	7.899e-07	0.006296	0.0101	0.009953	0.007057	intergenic	LINC01360;LINC02238	dist=7897;dist=272068	.	.
3	rs1923216	1	73829128	C	T	0.4235	1.053e-09	-6.101	6.989e-07	0.005152	0.009748	0.01825	0.00863436	intergenic	LINC01360;LINC02238	dist=8194;dist=271771	.	.
3	rs7415137	1	73829928	G	A	0.4215	6.336e-10	6.182	6.771e-07	0.007221	0.009403	0.009368	0.00705505	intergenic	LINC01360;LINC02238	dist=8994;dist=270971	.	.
3	rs10890036	1	73830081	C	T	0.4215	6.417e-10	6.18	6.948e-07	0.007222	0.009404	0.009368	0.00705505	intergenic	LINC01360;LINC02238	dist=9147;dist=270818	.	.
3	rs2025080	1	73832675	C	T	0.4205	6.586e-10	-6.176	7.465e-07	0.006275	0.0101	0.00983	0.00705018	intergenic	LINC01360;LINC02238	dist=11741;dist=268224	.	.
3	rs10749821	1	73833914	C	T	0.4215	6.193e-10	6.185	6.469e-07	0.007216	0.009671	0.009081	0.00704709	intergenic	LINC01360;LINC02238	dist=12980;dist=266985	.	.
3	rs11210215	1	73834346	C	T	0.4215	6.107e-10	6.188	6.557e-07	0.007216	0.009672	0.008862	0.00704693	intergenic	LINC01360;LINC02238	dist=13412;dist=266553	.	.
3	rs2340401	1	73835726	C	T	0.4215	5.555e-10	6.203	7.086e-07	0.005742	0.01067	0.008507	0.00702571	intergenic	LINC01360;LINC02238	dist=14792;dist=265173	.	.
3	rs2340403	1	73835777	C	T	0.4215	6.202e-10	-6.185	5.595e-07	0.00708	0.01011	0.009591	0.00702846	intergenic	LINC01360;LINC02238	dist=14843;dist=265122	.	.
3	rs12034860	1	73836769	G	A	0.4215	2.975e-09	5.933	6.15e-07	0.3412	0.009186	0.00878	0.00701989	intergenic	LINC01360;LINC02238	dist=15835;dist=264130	.	.
3	rs12128161	1	73837417	C	A	0.4235	9.431e-10	-6.119	6.351e-07	0.004359	0.01175	0.01621	0.00859231	intergenic	LINC01360;LINC02238	dist=16483;dist=263482	.	.
3	rs12128235	1	73837608	C	A	0.4215	5.733e-10	-6.198	6.797e-07	0.005846	0.01055	0.00895	0.00708158	intergenic	LINC01360;LINC02238	dist=16674;dist=263291	.	.
3	rs12117304	1	73837640	C	T	0.4215	3.636e-09	5.9	7.037e-07	0.3354	0.0104	0.008638	0.0071583	intergenic	LINC01360;LINC02238	dist=16706;dist=263259	.	.
3	rs1923223	1	73839564	C	T	0.4215	7.468e-10	6.156	5.725e-07	0.006258	0.01059	0.009595	0.00699439	intergenic	LINC01360;LINC02238	dist=18630;dist=261335	.	.
3	rs1923224	1	73839921	C	T	0.4215	6.311e-10	6.182	5.916e-07	0.006311	0.01088	0.009829	0.00699439	intergenic	LINC01360;LINC02238	dist=18987;dist=260978	.	.
3	rs7554968	1	73840843	C	T	0.4215	7.003e-10	6.166	5.106e-07	0.006009	0.01034	0.01015	0.00699455	intergenic	LINC01360;LINC02238	dist=19909;dist=260056	.	.
3	rs113118350	1	73842119	GGTGA	G	0.3917	6.135e-10	6.187	1.914e-07	0.1611	0.03521	0.1689	0.0069496	intergenic	LINC01360;LINC02238	dist=21185;dist=258780	.	.
3	rs11210216	1	73842480	G	A	0.4165	2.016e-09	5.996	4.3e-07	0.005783	0.01168	0.01222	0.00838745	intergenic	LINC01360;LINC02238	dist=21546;dist=258419	.	.
3	rs7544965	1	73842685	C	T	0.4165	1.998e-09	-5.998	4.606e-07	0.005794	0.01158	0.01173	0.00838745	intergenic	LINC01360;LINC02238	dist=21751;dist=258214	.	.
3	rs7516608	1	73843213	G	T	0.4165	2.032e-09	5.995	4.676e-07	0.005831	0.01154	0.01185	0.00838764	intergenic	LINC01360;LINC02238	dist=22279;dist=257686	.	.
3	rs10890037	1	73845254	G	A	0.4165	1.957e-09	6.001	4.39e-07	0.006128	0.01177	0.01131	0.00838784	intergenic	LINC01360;LINC02238	dist=24320;dist=255645	.	.
3	rs10749822	1	73845360	G	T	0.4155	2.416e-09	5.967	4.573e-07	0.00654	0.01187	0.01284	0.00838784	intergenic	LINC01360;LINC02238	dist=24426;dist=255539	.	.
3	rs10736419	1	73845941	C	T	0.4165	2.161e-09	5.985	4.401e-07	0.005854	0.0122	0.01235	0.00838803	intergenic	LINC01360;LINC02238	dist=25007;dist=254958	.	.
3	rs11210217	1	73846542	G	A	0.4165	2.42e-09	5.967	4.483e-07	0.005955	0.01354	0.01225	0.00838803	intergenic	LINC01360;LINC02238	dist=25608;dist=254357	.	.
3	rs7515828	1	73848331	C	T	0.4304	5.526e-10	6.203	8.602e-08	0.001907	0.02173	0.0222	0.0100647	intergenic	LINC01360;LINC02238	dist=27397;dist=252568	.	.
3	rs7546987	1	73848505	C	T	0.4314	8.297e-10	-6.139	9.978e-08	0.001625	0.02804	0.02945	0.0126229	intergenic	LINC01360;LINC02238	dist=27571;dist=252394	.	.
3	rs7547059	1	73848537	C	A	0.4364	1.112e-09	-6.092	5.467e-08	0.001485	0.03351	0.03499	0.0140663	intergenic	LINC01360;LINC02238	dist=27603;dist=252362	.	.
3	rs12135094	1	73848944	C	T	0.4354	9.321e-10	-6.121	4.593e-08	0.00147	0.1573	0.05611	0.0140579	intergenic	LINC01360;LINC02238	dist=28010;dist=251955	.	.
3	rs12120214	1	73848985	G	A	0.4354	5.201e-10	-6.213	5.018e-08	0.001513	0.03206	0.02847	0.0140579	intergenic	LINC01360;LINC02238	dist=28051;dist=251914	.	.
3	rs12127629	1	73848987	C	A	0.4354	5.21e-10	6.213	5.034e-08	0.001513	0.03206	0.02848	0.0140579	intergenic	LINC01360;LINC02238	dist=28053;dist=251912	.	.
3	rs11210219	1	73849016	G	A	0.4354	5.257e-10	-6.211	5.103e-08	0.001517	0.03206	0.0285	0.0140579	intergenic	LINC01360;LINC02238	dist=28082;dist=251883	.	.
3	rs10789370	1	73849297	G	A	0.4354	1.056e-09	-6.101	4.389e-08	0.00149	0.03551	0.03423	0.0140576	intergenic	LINC01360;LINC02238	dist=28363;dist=251602	.	.
3	rs11210220	1	73849655	G	T	0.4354	2.019e-09	5.996	5.221e-08	0.001534	0.03451	0.03441	0.0140676	intergenic	LINC01360;LINC02238	dist=28721;dist=251244	.	.
3	rs11210221	1	73849673	C	T	0.4354	2.336e-09	5.973	5.115e-08	0.001897	0.03504	0.034	0.0140288	intergenic	LINC01360;LINC02238	dist=28739;dist=251226	.	.
3	rs11210222	1	73849687	C	T	0.4354	1.949e-09	6.002	4.941e-08	0.001536	0.03423	0.03436	0.0140288	intergenic	LINC01360;LINC02238	dist=28753;dist=251212	.	.
3	rs12718438	1	73851340	G	A	0.3559	1.788e-09	-6.016	2.884e-06	0.01031	0.01213	0.009901	0.00242907	intergenic	LINC01360;LINC02238	dist=30406;dist=249559	.	.
3	rs6671002	1	73851752	G	A	0.4354	1.967e-09	6.001	4.619e-08	0.001421	0.03436	0.03763	0.0140614	intergenic	LINC01360;LINC02238	dist=30818;dist=249147	.	.
3	rs6671203	1	73851936	G	A	0.4354	1.837e-09	6.012	4.946e-08	0.001544	0.03167	0.03506	0.0140647	intergenic	LINC01360;LINC02238	dist=31002;dist=248963	.	.
3	rs6673919	1	73852090	C	T	0.4354	1.87e-09	6.009	5.359e-08	0.001481	0.03465	0.03416	0.0130455	intergenic	LINC01360;LINC02238	dist=31156;dist=248809	.	.
3	rs138758275	1	73852398	C	CATTA	0.4354	3.86e-09	-5.89	1.736e-08	0.351	0.3533	0.2785	0.014065	intergenic	LINC01360;LINC02238	dist=31464;dist=248501	.	.
3	rs11210224	1	73852554	C	T	0.4354	2.604e-08	5.566	5.07e-08	0.3507	0.03538	0.03343	0.0140627	intergenic	LINC01360;LINC02238	dist=31620;dist=248345	.	.
3	rs11210225	1	73852585	G	A	0.4354	2.064e-09	-5.993	5.645e-08	0.00148	0.03486	0.03458	0.0140624	intergenic	LINC01360;LINC02238	dist=31651;dist=248314	.	.
3	rs1923230	1	73852765	C	T	0.4354	2.013e-09	5.997	5.512e-08	0.001487	0.03486	0.03392	0.0140624	intergenic	LINC01360;LINC02238	dist=31831;dist=248134	.	.
3	rs1923231	1	73852939	C	T	0.4354	2.063e-09	5.993	5.586e-08	0.00153	0.03486	0.03394	0.0140343	intergenic	LINC01360;LINC02238	dist=32005;dist=247960	.	.
3	rs1923233	1	73853460	C	T	0.4354	1.303e-09	-6.067	6.164e-08	0.001488	0.03479	0.03398	0.0140634	intergenic	LINC01360;LINC02238	dist=32526;dist=247439	.	.
3	rs1923234	1	73853481	G	A	0.4354	1.309e-09	-6.066	6.198e-08	0.001488	0.03485	0.03398	0.0140634	intergenic	LINC01360;LINC02238	dist=32547;dist=247418	.	.
3	rs1923236	1	73853826	C	T	0.4354	1.265e-09	6.072	5.914e-08	0.001493	0.03481	0.03348	0.014064	intergenic	LINC01360;LINC02238	dist=32892;dist=247073	.	.
3	rs12044079	1	73854147	C	T	0.4354	9.325e-10	-6.121	6.155e-08	0.0009177	0.03541	0.03368	0.0140657	intergenic	LINC01360;LINC02238	dist=33213;dist=246752	.	.
3	rs11210226	1	73854284	G	A	0.4354	9.716e-10	6.114	6.017e-08	0.0009242	0.03658	0.03401	0.0140657	intergenic	LINC01360;LINC02238	dist=33350;dist=246615	.	.
3	rs11210227	1	73855015	C	A	0.4344	1.684e-09	-6.026	5.918e-08	0.001075	0.03599	0.03307	0.0141991	intergenic	LINC01360;LINC02238	dist=34081;dist=245884	.	.
3	rs1338645	1	73855051	G	A	0.4344	1.693e-09	-6.025	6.189e-08	0.001075	0.03599	0.03286	0.0140637	intergenic	LINC01360;LINC02238	dist=34117;dist=245848	.	.
3	rs34547319	1	73855495	G	T	0.4354	9.286e-10	6.121	6.002e-08	0.0009193	0.0356	0.0337	0.0140624	intergenic	LINC01360;LINC02238	dist=34561;dist=245404	.	.
3	rs55994666	1	73856091	C	A	0.4354	9.587e-10	6.116	6.318e-08	0.0009365	0.03402	0.03412	0.0146636	intergenic	LINC01360;LINC02238	dist=35157;dist=244808	.	.
3	rs6701544	1	73856471	C	T	0.4354	9.184e-10	6.123	6.593e-08	0.0008865	0.035	0.03343	0.0140627	intergenic	LINC01360;LINC02238	dist=35537;dist=244428	.	.
3	rs6704376	1	73856841	C	T	0.4354	9.377e-10	6.12	6.109e-08	0.0009535	0.035	0.03347	0.0140624	intergenic	LINC01360;LINC02238	dist=35907;dist=244058	.	.
3	rs6704461	1	73856933	C	T	0.4354	8.695e-10	6.132	6.074e-08	0.0008548	0.03509	0.03352	0.0140627	intergenic	LINC01360;LINC02238	dist=35999;dist=243966	.	.
3	rs6689493	1	73857058	C	T	0.4344	8.972e-10	-6.127	5.26e-08	0.0009959	0.03486	0.03338	0.0140627	intergenic	LINC01360;LINC02238	dist=36124;dist=243841	.	.
3	rs1984201	1	73857097	C	T	0.4354	8.081e-10	6.143	5.236e-08	0.0009289	0.03511	0.03136	0.0140627	intergenic	LINC01360;LINC02238	dist=36163;dist=243802	.	.
3	rs1856410	1	73857494	G	A	0.4354	8.506e-10	6.135	5.215e-08	0.0009173	0.03511	0.03347	0.014031	intergenic	LINC01360;LINC02238	dist=36560;dist=243405	.	.
3	rs1338654	1	73857724	G	T	0.4354	7.79e-10	-6.149	4.869e-08	0.0008953	0.03528	0.03498	0.0125722	intergenic	LINC01360;LINC02238	dist=36790;dist=243175	.	.
3	rs5015579	1	73857839	G	T	0.4344	7.23e-10	-6.161	4.65e-08	0.0009308	0.03706	0.03294	0.0128136	intergenic	LINC01360;LINC02238	dist=36905;dist=243060	.	.
3	rs5015578	1	73857844	G	A	0.4344	7.202e-10	6.162	4.422e-08	0.0009603	0.03693	0.03295	0.0128136	intergenic	LINC01360;LINC02238	dist=36910;dist=243055	.	.
3	rs11809026	1	73858039	C	T	0.4354	6.742e-10	-6.172	4.589e-08	0.0009196	0.03522	0.03367	0.011144	intergenic	LINC01360;LINC02238	dist=37105;dist=242860	.	.
3	rs11805813	1	73858079	G	A	0.4354	7.424e-10	6.157	4.379e-08	0.0009198	0.03538	0.03364	0.0128136	intergenic	LINC01360;LINC02238	dist=37145;dist=242820	.	.
3	rs11805871	1	73858463	G	A	0.4354	6.156e-10	6.186	3.136e-08	0.0009167	0.0343	0.03364	0.0128133	intergenic	LINC01360;LINC02238	dist=37529;dist=242436	.	.
3	rs11809098	1	73858561	C	T	0.4354	5.759e-10	-6.197	2.96e-08	0.0008402	0.03488	0.0337	0.0128159	intergenic	LINC01360;LINC02238	dist=37627;dist=242338	.	.
3	rs11809486	1	73858941	C	T	0.4354	2.3e-09	-5.975	5.698e-08	0.0009372	0.03461	0.03358	0.0140861	intergenic	LINC01360;LINC02238	dist=38007;dist=241958	.	.
3	rs10890038	1	73859002	C	T	0.3559	1.67e-09	6.027	3.215e-06	0.006875	0.009439	0.009709	0.00243204	intergenic	LINC01360;LINC02238	dist=38068;dist=241897	.	.
3	rs11210228	1	73859290	G	T	0.4334	3.983e-09	5.885	2.977e-08	0.0009078	0.07623	0.2347	0.0148916	intergenic	LINC01360;LINC02238	dist=38356;dist=241609	.	.
3	rs11804814	1	73859292	C	T	0.4334	3.867e-09	5.89	2.967e-08	0.0009078	0.07624	0.2343	0.0144331	intergenic	LINC01360;LINC02238	dist=38358;dist=241607	.	.
3	rs10890039	1	73859300	G	A	0.4334	5.329e-10	-6.209	4.342e-08	0.000919	0.03388	0.03037	0.0144378	intergenic	LINC01360;LINC02238	dist=38366;dist=241599	.	.
3	rs6696623	1	73859367	C	T	0.4344	8.976e-10	-6.127	5.012e-08	0.0009271	0.03529	0.03286	0.0154821	intergenic	LINC01360;LINC02238	dist=38433;dist=241532	.	.
3	rs11210229	1	73860028	G	A	0.4354	3.58e-09	5.903	6.409e-08	0.0009209	0.03729	0.04286	0.0153236	intergenic	LINC01360;LINC02238	dist=39094;dist=240871	.	.
3	rs1923238	1	73860311	C	A	0.4354	4.26e-09	5.874	5.941e-08	0.0009306	0.03948	0.04921	0.0153883	intergenic	LINC01360;LINC02238	dist=39377;dist=240588	.	.
3	rs12031120	1	73860821	G	A	0.4354	2.94e-09	-5.935	1.175e-08	0.0008591	0.08031	0.2958	0.0138989	intergenic	LINC01360;LINC02238	dist=39887;dist=240078	.	.
3	rs1338651	1	73861924	C	A	0.4354	2.82e-09	-5.942	5.333e-08	0.0008415	0.04063	0.0378	0.0139056	intergenic	LINC01360;LINC02238	dist=40990;dist=238975	.	.
3	rs10159196	1	73863269	C	T	0.4354	3.238e-09	-5.919	5.271e-08	0.0009412	0.04041	0.03818	0.0151269	intergenic	LINC01360;LINC02238	dist=42335;dist=237630	.	.
3	rs1572669	1	73863862	G	A	0.3559	3.714e-09	5.896	3.131e-06	0.006412	0.01207	0.01218	0.00252104	intergenic	LINC01360;LINC02238	dist=42928;dist=237037	.	.
3	rs1885248	1	73865596	C	T	0.3569	2.424e-09	-5.966	3.9e-06	0.006895	0.0136	0.008819	0.00237618	intergenic	LINC01360;LINC02238	dist=44662;dist=235303	.	.
3	rs1885249	1	73865740	G	A	0.4354	3.317e-09	5.915	5.332e-08	0.001007	0.04182	0.03864	0.0137316	intergenic	LINC01360;LINC02238	dist=44806;dist=235159	.	.
3	rs1416268	1	73866272	C	T	0.4354	3.489e-09	5.907	5.52e-08	0.001005	0.04147	0.04058	0.0137316	intergenic	LINC01360;LINC02238	dist=45338;dist=234627	.	.
3	rs1416269	1	73866598	G	A	0.4354	3.228e-09	5.92	4.879e-08	0.001008	0.04143	0.04059	0.0137312	intergenic	LINC01360;LINC02238	dist=45664;dist=234301	.	.
3	rs1923244	1	73869230	C	T	0.3559	2.4e-09	5.968	3.401e-06	0.006822	0.01167	0.01081	0.00254841	intergenic	LINC01360;LINC02238	dist=48296;dist=231669	.	.
3	rs12035848	1	73870901	G	A	0.4354	1.954e-09	-6.002	5.609e-08	0.001237	0.03998	0.04252	0.0137142	intergenic	LINC01360;LINC02238	dist=49967;dist=229998	.	.
3	rs12043387	1	73871205	G	A	0.4354	1.721e-09	6.022	5.605e-08	0.00124	0.04085	0.04225	0.0151471	intergenic	LINC01360;LINC02238	dist=50271;dist=229694	.	.
3	rs2340404	1	73873036	G	A	0.3569	1.183e-09	6.082	3.811e-06	0.00686	0.01564	0.009846	0.00254847	intergenic	LINC01360;LINC02238	dist=52102;dist=227863	.	.
3	rs3964487	1	73873755	G	A	0.4364	2.577e-08	5.568	5.345e-08	0.4026	0.04115	0.03855	0.0140294	intergenic	LINC01360;LINC02238	dist=52821;dist=227144	.	.
3	rs1475064	1	73882478	G	A	0.4354	1.234e-09	6.076	2.822e-08	0.001178	0.03627	0.03761	0.0150966	intergenic	LINC01360;LINC02238	dist=61544;dist=218421	.	.
3	rs1475065	1	73882880	G	A	0.3559	1.097e-09	6.095	2.316e-06	0.006424	0.011	0.01426	0.00263463	intergenic	LINC01360;LINC02238	dist=61946;dist=218019	.	.	y
3	rs12731986	1	73884838	C	T	0.4354	2.357e-09	-5.971	4.673e-07	0.001182	0.03367	0.03805	0.0148505	intergenic	LINC01360;LINC02238	dist=63904;dist=216061	.	.
3	rs11210238	1	73890593	G	A	0.3549	1.813e-09	-6.014	2.737e-05	0.00734	0.01054	0.01157	0.0025733	intergenic	LINC01360;LINC02238	dist=69659;dist=210306	.	.
4	rs1554266	2	22430795	C	T	0.4622	1.459e-09	-6.049	0.3217	0.1184	0.0004117	5.838e-07	0.0213201	ncRNA_intronic	ENSG00000228999	.	.	.	y
4	rs6726012	2	22431291	G	T	0.4592	4.779e-08	5.459	0.4368	0.08297	0.0006059	5.19e-07	0.0301856	ncRNA_intronic	ENSG00000228999	.	.	.
4	rs10193722	2	22439514	C	A	0.4632	2.813e-08	-5.553	0.3421	0.1015	0.002093	2.183e-07	0.0248525	ncRNA_intronic	ENSG00000228999	.	.	.
4	rs12616120	2	22439743	C	T	0.4573	1.63e-08	5.647	0.2904	0.07243	0.0005628	1.109e-07	0.0712508	ncRNA_intronic	ENSG00000228999	.	.	.
4	rs4557006	2	22443840	G	A	0.4652	2.712e-08	5.559	0.3733	0.1198	0.001637	1.566e-07	0.030418	ncRNA_intronic	ENSG00000228999	.	.	.
4	rs4321395	2	22444221	G	A	0.4642	3.645e-08	5.507	0.4023	0.1135	0.001761	2.575e-07	0.0271888	ncRNA_intronic	ENSG00000228999	.	.	.
4	rs6759922	2	22450249	G	A	0.4592	3.74e-08	5.503	0.406	0.1258	0.001987	3.292e-07	0.0220958	ncRNA_intronic	ENSG00000228999	.	.	.
4	rs11124360	2	22495304	C	T	0.498	9.588e-10	6.116	0.279	0.1073	2.565e-06	2.871e-07	0.103052	ncRNA_intronic	ENSG00000228999	.	.	.
4	rs57974740	2	22495845	C	T	0.499	3.763e-09	-5.894	0.275	0.09628	2.704e-06	3.582e-07	0.102897	ncRNA_intronic	ENSG00000228999	.	.	.
4	rs56215556	2	22497603	G	A	0.4901	5.231e-09	5.84	0.3544	0.1164	1.93e-06	4.307e-07	0.0947218	ncRNA_intronic	ENSG00000228999	.	.	.
4	rs4589792	2	22498479	C	T	0.4861	1.193e-08	5.701	0.3886	0.1229	3.961e-06	8.939e-07	0.0979761	ncRNA_intronic	ENSG00000228999	.	.	.
4	rs8179610	2	22500090	G	T	0.4891	3.049e-09	5.929	0.3254	0.09938	2.164e-06	2.886e-07	0.0970354	ncRNA_intronic	ENSG00000228999	.	.	.
4	rs12618722	2	22500798	G	T	0.4891	3.095e-09	5.926	0.3068	0.09676	2.25e-06	3.789e-07	0.0941196	ncRNA_intronic	ENSG00000228999	.	.	.
4	rs4665495	2	22501253	G	T	0.4861	3.352e-08	-5.522	0.2742	0.1066	2.502e-06	3.466e-07	0.114926	ncRNA_intronic	ENSG00000228999	.	.	.
4	rs12615053	2	22526880	G	T	0.4861	3.989e-08	5.491	0.491	0.1177	6.043e-06	4.477e-07	0.0941066	ncRNA_intronic	ENSG00000228999	.	.	.
4	rs58261213	2	22532372	G	A	0.4861	4.821e-08	-5.458	0.5553	0.1192	4.222e-06	3.125e-07	0.116282	ncRNA_intronic	ENSG00000228999	.	.	.
4	rs4300861	2	22549441	C	T	0.3718	9.468e-10	6.118	0.2839	0.5788	7.767e-06	1.033e-06	0.0155514	ncRNA_intronic	ENSG00000228999	.	.	.
4	rs67446571	2	22554648	G	A	0.3767	3.312e-10	-6.283	0.1988	0.6805	7.396e-06	6.995e-07	0.0146285	ncRNA_intronic	ENSG00000228999	.	.	.
4	rs58184964	2	22558876	G	A	0.3777	2.492e-10	6.327	0.1692	0.7344	1.335e-05	1.045e-06	0.0146201	ncRNA_intronic	ENSG00000228999	.	.	.
4	rs57537843	2	22558973	G	A	0.3708	1.22e-09	6.078	0.2562	0.6618	7.67e-06	1.378e-06	0.015276	ncRNA_intronic	ENSG00000228999	.	.	.
4	rs12620364	2	22562609	G	A	0.3708	1.943e-08	5.617	0.2255	0.6476	0.0004368	2.21e-06	0.0138092	ncRNA_intronic	ENSG00000228999	.	.	.
4	rs2339515	2	22564293	G	T	0.3708	9.481e-10	6.118	0.2129	0.6806	1.097e-05	1.399e-06	0.0137753	ncRNA_intronic	ENSG00000228999	.	.	.
4	rs12619197	2	22566548	G	A	0.4553	9.246e-10	6.122	0.03065	0.6161	3.775e-05	4.409e-06	0.0424747	ncRNA_intronic	ENSG00000228999	.	.	.	y
4	rs12614708	2	22568238	C	A	0.3708	2.203e-10	6.346	0.2123	0.6748	9.877e-06	8.77e-07	0.0141853	ncRNA_intronic	ENSG00000228999	.	.	.
4	rs1995812	2	22569369	G	A	0.3708	8.07e-10	6.144	0.213	0.6797	1.131e-05	1.022e-06	0.0137715	ncRNA_intronic	ENSG00000228999	.	.	.
4	rs1463979	2	22570074	G	A	0.3787	6.576e-10	-6.176	0.1371	0.7471	2.66e-05	5.841e-07	0.0131099	ncRNA_intronic	ENSG00000228999	.	.	.
4	rs66994942	2	22577783	G	A	0.3509	5.756e-11	6.55	0.1948	0.01097	4.434e-06	2.313e-06	0.0466681	ncRNA_intronic	ENSG00000228999	.	.	.	y
4	rs61533748	2	22582968	C	T	0.3777	1.084e-10	-6.455	0.2507	0.01227	9.654e-06	8.195e-07	0.0591344	ncRNA_intronic	ENSG00000228999	.	.	.
4	rs12466671	2	22583435	G	A	0.3767	1.005e-10	-6.466	0.2224	0.01024	1.072e-05	1.057e-06	0.0611899	ncRNA_intronic	ENSG00000228999	.	.	.
4	rs12466547	2	22590100	G	A	0.3499	5.096e-09	5.844	0.5299	0.01415	2.226e-06	5.008e-06	0.0469656	ncRNA_intronic	ENSG00000228999	.	.	.
4	rs12616949	2	22594027	G	A	0.3569	3.548e-09	5.904	0.446	0.004258	3.759e-06	1.355e-05	0.0485289	ncRNA_intronic	ENSG00000228999	.	.	.
4	rs1355175	2	22761803	C	T	0.341	6.911e-10	-6.168	0.2331	0.3214	4.395e-06	5.72e-06	0.0113404	ncRNA_intronic	LINC01884	.	.	.
4	rs937930	2	22766554	G	A	0.34	3.332e-10	-6.282	0.2188	0.2577	3.751e-06	5.267e-06	0.0111081	ncRNA_intronic	LINC01884	.	.	.	y
4	rs11124582	2	22834870	G	A	0.3131	2.586e-08	5.567	0.02769	0.3025	4.229e-05	0.0002271	0.0213545	intergenic	LINC01884;RN7SKP27	dist=63202;dist=249554	.	.
4	rs7562330	2	22861495	C	T	0.3728	1.779e-08	-5.632	0.4852	0.3716	3.213e-06	0.003257	0.00334488	intergenic	LINC01884;RN7SKP27	dist=89827;dist=222929	.	.
4	rs6721370	2	22861844	G	A	0.3728	1.916e-08	5.619	0.4892	0.3893	3.156e-06	0.003492	0.00334364	intergenic	LINC01884;RN7SKP27	dist=90176;dist=222580	.	.
4	rs6711601	2	22862175	G	A	0.3728	2.112e-08	-5.603	0.4809	0.372	3.388e-06	0.003866	0.0033448	intergenic	LINC01884;RN7SKP27	dist=90507;dist=222249	.	.
4	rs28525561	2	22864153	G	A	0.3728	2.013e-08	5.611	0.4923	0.3764	2.6e-06	0.004254	0.00334873	intergenic	LINC01884;RN7SKP27	dist=92485;dist=220271	.	.
4	rs13012903	2	22888130	G	A	0.3728	4.137e-09	5.879	0.03019	0.1419	1.205e-06	0.002105	0.00334927	intergenic	LINC01884;RN7SKP27	dist=116462;dist=196294	.	.	y
5	rs472140	2	45139904	C	T	0.4205	8.273e-11	6.496	3.186e-14	0.149	0.3781	0.0005048	0.00202582	intergenic	AC067957.1;LINC01833	dist=130635;dist=8312	.	.	y
5	rs72794102	2	45151600	C	T	0.33	1.768e-09	6.018	9.848e-07	0.4138	0.1107	1.303e-05	0.0022783	ncRNA_intronic	LINC01833	.	.	.
5	rs7568987	2	45154229	G	A	0.3121	5.14e-10	-6.215	1.884e-07	0.3569	0.1984	1.016e-05	0.00146842	ncRNA_exonic	LINC01833	.	.	.	y
5	rs7569203	2	45154418	C	A	0.3141	7.761e-10	-6.15	2.427e-07	0.4038	0.2534	1.159e-05	0.000997654	ncRNA_intronic	LINC01833	.	.	.
5	rs13383034	2	45155276	C	T	0.3131	1.409e-09	6.054	1.225e-07	0.358	0.2371	6.91e-06	0.00143814	ncRNA_exonic	ENSG00000278957	.	.	.
5	rs4953152	2	45170153	G	A	0.3082	3.088e-08	5.536	1.85e-12	0.9859	0.3186	0.0008728	0.00160653	intronic	SIX3	.	.	.
6	rs2678898	2	58171964	C	T	0.3777	4.747e-08	-5.461	1.282e-05	0.003173	0.2302	0.3048	0.000133687	intronic	VRK2	.	.	.	y
7	rs10865306	2	58913139	C	T	0.1451	3.585e-08	-5.51	0.00546	0.462	4.839e-05	0.2246	0.000233512	ncRNA_intronic	LINC01122	.	.	.	y
8	rs7570854	2	101247565	C	T	0.333	3.984e-08	5.492	0.0002787	0.00434	0.04199	0.001082	0.0648455	intergenic	LINC01849;ENSG00000287832	dist=19561;dist=11341	.	.
8	rs4625930	2	101249256	G	A	0.325	6.137e-09	-5.813	0.0001729	0.003705	0.03666	0.000321	0.0425912	intergenic	LINC01849;ENSG00000287832	dist=21252;dist=9650	.	.	y
8	rs4335962	2	101249374	C	T	0.325	2.371e-08	5.583	0.0001597	0.003486	0.03741	0.0004013	0.0426422	intergenic	LINC01849;ENSG00000287832	dist=21370;dist=9532	.	.
8	rs7602304	2	101253985	G	A	0.3201	9.766e-09	5.735	0.0004666	0.002023	0.06695	0.0002791	0.0324474	intergenic	LINC01849;ENSG00000287832	dist=25981;dist=4921	.	.
8	rs12712078	2	101254202	C	T	0.3211	4.866e-08	-5.456	0.0004904	0.00212	0.07471	0.0002842	0.0323199	intergenic	LINC01849;ENSG00000287832	dist=26198;dist=4704	.	.
9	rs35942385	2	144208523	G	T	0.3569	1.682e-08	-5.642	2.161e-07	4.213e-06	0.9499	0.6511	4.71683e-06	ncRNA_intronic	ENSG00000228655	.	.	.	y
9	rs13411140	2	144215811	C	T	0.3579	2.769e-08	-5.555	1.739e-07	4.508e-06	0.8967	0.7091	5.37057e-06	ncRNA_intronic	ENSG00000228655	.	.	.
9	rs13024996	2	144225215	C	A	0.3588	4.115e-08	-5.486	1.26e-07	6.018e-06	0.9155	0.7177	2.39712e-05	ncRNA_intronic	ENSG00000228655	.	.	.
9	rs4273169	2	144231309	G	A	0.3588	3.495e-08	-5.515	1.999e-07	1.241e-05	0.8831	0.8256	2.25845e-05	ncRNA_intronic	ENSG00000228655	.	.	.
10	rs6806356	3	48727636	G	A	0.2247	3.179e-08	-5.531	0.0001159	0.005964	0.06354	0.05567	0.000136254	intronic	IP6K2	.	.	.
10	rs4858830	3	48734002	C	T	0.2227	2.051e-08	5.608	3.789e-05	0.005039	0.06562	0.05256	0.000138153	intronic	IP6K2	.	.	.
10	rs9882443	3	48749064	G	A	0.2157	4.076e-08	-5.488	2.55e-05	0.005056	0.04472	0.05043	0.000139136	intronic	IP6K2	.	.	.
10	rs4858800	3	48755820	G	A	0.2227	2.218e-08	5.594	3.199e-05	0.005618	0.06605	0.0486	0.000122809	intergenic	IP6K2;PRKAR2A	dist=1109;dist=28199	.	.
10	rs10865953	3	48759562	C	T	0.2237	1.964e-08	-5.615	3.462e-05	0.005425	0.0595	0.03734	0.000128375	intergenic	IP6K2;PRKAR2A	dist=4851;dist=24457	.	.
10	rs9848268	3	48762271	C	T	0.2157	1.784e-08	-5.632	3.138e-05	0.009851	0.06142	0.02789	0.000171862	intergenic	IP6K2;PRKAR2A	dist=7560;dist=21748	.	.
10	rs6796790	3	48780317	G	A	0.2197	4.946e-09	-5.849	6.36e-05	0.005242	0.0734	0.01967	9.23592e-05	intergenic	IP6K2;PRKAR2A	dist=25606;dist=3702	.	.
10	rs6442131	3	48782573	C	A	0.2197	3.119e-09	-5.925	6.02e-05	0.005275	0.06893	0.01948	9.64384e-05	intergenic	IP6K2;PRKAR2A	dist=27862;dist=1446	.	.
10	rs6766238	3	48801929	G	A	0.2187	8.044e-10	-6.144	5.304e-05	0.004734	0.04661	0.02106	9.5284e-05	intronic	PRKAR2A	.	.	.
10	rs7429596	3	48808531	C	T	0.2167	5.623e-09	5.828	5.397e-05	0.007502	0.05232	0.02095	9.09138e-05	intronic	PRKAR2A	.	.	.
10	rs9859473	3	48837182	C	T	0.2187	8.004e-09	5.768	8.362e-05	0.004224	0.04155	0.01969	9.15082e-05	intronic	PRKAR2A	.	.	.
10	rs7639370	3	48837917	C	T	0.2187	3.697e-09	-5.897	4.444e-05	0.005729	0.04561	0.02105	9.97424e-05	intronic	PRKAR2A	.	.	.
10	rs7611628	3	48838364	C	T	0.2187	8.111e-09	5.766	8.485e-05	0.004488	0.04074	0.01926	9.15166e-05	intronic	PRKAR2A	.	.	.
10	rs9879978	3	48846600	G	T	0.2197	1.405e-09	6.055	7.462e-05	0.004112	0.04108	0.01945	9.15082e-05	intronic	PRKAR2A	.	.	.
10	rs9284885	3	48883100	C	A	0.2207	6.043e-09	5.816	9.137e-05	0.004789	0.06502	0.01799	9.15082e-05	intronic	PRKAR2A	.	.	.
10	rs4974088	3	48898749	C	T	0.2177	2.176e-08	5.597	0.0001037	0.006686	0.04547	0.01836	9.65873e-05	intronic	SLC25A20	.	.	.
10	rs7611358	3	48927856	C	T	0.2197	7.754e-09	-5.774	0.0001037	0.00485	0.05496	0.01785	0.000100693	intronic	SLC25A20	.	.	.
10	rs7621226	3	48928759	C	T	0.2197	7.067e-09	5.789	0.0001011	0.004807	0.05229	0.01752	0.000100693	intronic	SLC25A20	.	.	.
10	rs12715430	3	48942855	C	A	0.2197	2.651e-09	5.952	8.682e-05	0.004562	0.0405	0.01731	9.86984e-05	intergenic	SLC25A20;ARIH2OS	dist=6518;dist=12360	.	.
10	rs11707968	3	48953349	C	T	0.2197	2.207e-09	-5.982	8.468e-05	0.004707	0.03644	0.01481	0.000110459	intergenic	SLC25A20;ARIH2OS	dist=17012;dist=1866	.	.
10	rs9284886	3	48960572	G	A	0.2197	2.553e-08	5.57	0.0001071	0.0047	0.04333	0.1554	0.000120973	intronic	ARIH2	.	.	.
10	rs7653408	3	48972351	C	A	0.2197	2.761e-09	5.945	7.774e-05	0.004779	0.04325	0.01524	0.000120083	intronic	ARIH2	.	.	.
10	rs9864243	3	48982732	G	A	0.2197	2.825e-09	-5.941	8.422e-05	0.005016	0.03619	0.01821	0.000115958	intronic	ARIH2	.	.	.
10	rs7372883	3	48991255	G	A	0.2197	2.075e-09	-5.992	8.58e-05	0.005102	0.03215	0.01538	0.000109999	intronic	ARIH2	.	.	.
10	rs4974083	3	49000626	G	A	0.2177	1.039e-08	5.724	0.0001236	0.007523	0.04207	0.01538	0.000109845	intronic	ARIH2	.	.	.
10	rs7434187	3	49032967	C	T	0.2167	4.331e-09	-5.871	0.0001159	0.005257	0.04242	0.0141	8.53513e-05	intronic	P4HTM	.	.	.
10	rs6446204	3	49034879	C	T	0.2167	9.212e-09	5.745	0.0001236	0.006648	0.05014	0.01587	8.37375e-05	intronic	P4HTM	.	.	.
10	rs6772452	3	49040462	G	A	0.2207	5.247e-09	5.839	0.0001783	0.006655	0.02794	0.01851	8.03286e-05	intronic	P4HTM	.	.	.
10	rs7100	3	49053219	G	A	0.2137	2.051e-09	5.994	7.585e-05	0.003045	0.03637	0.00957	6.46309e-05	UTR3	WDR6	ENST00000395474.7_6:c.*498G>A;ENST00000610967.4_6:c.*498G>A;ENST00000608424.6_8:c.*498G>A	.	.
10	rs3087866	3	49054692	C	T	0.2137	6.626e-10	6.175	6.75e-05	0.002845	0.03893	0.008188	9.20958e-05	exonic	DALRD3	.	synonymous SNV	DALRD3:ENST00000313778.9_9:exon5:c.A395A:p.Q132Q,DALRD3:ENST00000341949.9_11:exon5:c.A896A:p.Q299Q,DALRD3:ENST00000441576.6_5:exon5:c.A896A:p.Q299Q,DALRD3:ENST00000440857.5_5:exon6:c.A395A:p.Q132Q
10	rs6414614	3	49061328	C	T	0.2167	9.469e-09	5.74	0.000152	0.006867	0.04612	0.01429	7.75408e-05	downstream	ENSG00000290315;IMPDH2;NDUFAF3	dist=430	.	.
10	rs4974081	3	49070499	C	T	0.2197	7.599e-09	-5.777	0.0001399	0.004492	0.02989	0.01502	7.77106e-05	intronic	ENSG00000290315;QRICH1	.	.	.
10	rs9810318	3	49076071	C	T	0.2167	1.116e-08	5.712	0.0002889	0.006607	0.04168	0.01486	7.77463e-05	intronic	ENSG00000290315;QRICH1	.	.	.
10	rs6787808	3	49079105	C	T	0.2197	7.012e-09	5.791	0.000167	0.004466	0.02696	0.01373	7.75408e-05	intronic	ENSG00000290315;QRICH1	.	.	.
10	rs6798112	3	49093377	G	A	0.2197	6.083e-09	5.814	0.0001369	0.004477	0.02577	0.01396	7.7539e-05	intronic	ENSG00000290315;QRICH1	.	.	.
10	rs13099075	3	49100305	C	T	0.2197	6.753e-09	5.797	0.0001407	0.004474	0.02758	0.01413	7.95097e-05	intronic	ENSG00000290315;QRICH1	.	.	.
10	rs4955416	3	49108428	C	T	0.2207	8.834e-09	5.752	0.0001262	0.004629	0.03466	0.01613	7.43789e-05	intronic	ENSG00000290315;QRICH1	.	.	.
10	rs11130181	3	49109919	G	A	0.2256	1.514e-08	-5.66	0.0001787	0.004533	0.04351	0.01715	8.687e-05	intronic	ENSG00000290315;QRICH1	.	.	.
10	rs7621347	3	49110889	C	T	0.2157	1.469e-08	5.665	0.0002441	0.006289	0.04633	0.01627	7.75336e-05	intronic	ENSG00000290315;QRICH1	.	.	.
10	rs4955426	3	49143438	C	A	0.1998	1.695e-09	-6.025	0.0002618	0.007575	0.02418	0.03263	3.89296e-06	intergenic	QARS1;USP19	dist=1247;dist=2041	.	.
10	rs4955411	3	49145304	G	A	0.2028	9.301e-10	6.121	0.0002298	0.00575	0.01836	0.0312	2.95216e-06	downstream	USP19	dist=175	.	.
10	rs4292260	3	49148890	C	T	0.2028	1.166e-09	6.085	0.0002641	0.006208	0.01814	0.03175	3.43827e-06	intronic	USP19	.	.	.
10	rs9865051	3	49166069	C	T	0.2087	6.44e-09	-5.805	0.0004732	0.005958	0.01883	0.03543	4.00433e-06	intronic	LAMB2	.	.	.
10	rs9586	3	49213637	C	T	0.2068	1.154e-08	-5.706	0.0003194	0.03424	0.02582	0.214	2.66588e-07	UTR3	KLHDC8B	ENST00000332780.4_3:c.*403T>C	.	.
10	rs13084037	3	49214066	G	A	0.2107	1.616e-08	-5.649	0.0006535	0.04524	0.02623	0.1626	2.37969e-07	downstream	KLHDC8B	dist=147	.	.
10	rs9831648	3	49214303	G	T	0.2117	1.661e-08	-5.644	0.0005396	0.05129	0.02901	0.1524	2.37531e-07	downstream	C3orf84;KLHDC8B	dist=764	.	.
10	rs9834003	3	49216472	C	T	0.2445	5.2e-10	6.213	1.235e-05	0.0058	0.04151	0.07703	1.06091e-06	intronic	C3orf84	.	.	.
10	rs4955421	3	49218888	G	A	0.2445	5.446e-10	-6.206	1.349e-05	0.005354	0.04128	0.08287	1.0293e-06	intronic	C3orf84	.	.	.
10	rs7631586	3	49220137	G	A	0.2336	1.028e-09	6.105	1.292e-05	0.006734	0.03518	0.05994	1.01932e-06	intronic	C3orf84	.	.	.
10	rs4955423	3	49220448	G	A	0.2445	4.905e-10	-6.222	1.427e-05	0.005221	0.1815	0.07854	1.01468e-06	intronic	C3orf84	.	.	.
10	rs7432077	3	49222904	C	T	0.2445	5.383e-10	6.208	1.428e-05	0.005327	0.04449	0.07533	9.89532e-07	intronic	C3orf84	.	.	.
10	rs6446256	3	49224210	G	A	0.2445	5.321e-10	6.209	1.4e-05	0.005154	0.04478	0.07705	9.74496e-07	intronic	C3orf84	.	.	.
10	rs7429661	3	49228800	G	A	0.2435	5.068e-10	-6.217	2.335e-05	0.004496	0.03756	0.07747	9.24656e-07	intronic	C3orf84	.	.	.
10	rs11130183	3	49228946	G	A	0.2445	6.043e-10	6.189	1.552e-05	0.005301	0.04524	0.0787	9.97333e-07	intronic	C3orf84	.	.	.
10	rs6808036	3	49236439	G	T	0.2445	4.923e-10	6.222	1.533e-05	0.005047	0.04353	0.07544	8.67042e-07	UTR5	IHO1	ENST00000296449.9_2:c.-12775G>T;ENST00000438782.5_2:c.-12775G>T	.	.
10	rs13091206	3	49238718	G	A	0.2038	8.653e-09	5.755	0.0001845	0.009782	0.0111	0.572	3.76843e-06	intronic	IHO1	.	.	.
10	rs6769821	3	49244657	G	A	0.2396	1.008e-09	-6.108	4.18e-05	0.006226	0.03354	0.07936	8.41434e-07	intronic	IHO1	.	.	.
10	rs4955439	3	49245645	G	T	0.2435	5.581e-10	6.202	1.955e-05	0.004419	0.03456	0.08497	8.34507e-07	intronic	IHO1	.	.	.
10	rs9867285	3	49249381	G	A	0.2435	5.346e-10	6.209	2.037e-05	0.004462	0.03621	0.07635	8.27237e-07	intronic	IHO1	.	.	.
10	rs6446257	3	49253492	C	T	0.2435	6.096e-10	-6.188	1.993e-05	0.005316	0.03734	0.07431	8.20163e-07	intronic	IHO1	.	.	.
10	rs6803264	3	49254427	C	T	0.2028	1.476e-09	6.047	0.0002801	0.01094	0.01436	0.02715	3.59038e-06	intronic	IHO1	.	.	.
10	rs2082923	3	49255172	C	T	0.2445	6.062e-10	6.189	1.442e-05	0.005539	0.04158	0.07554	8.16094e-07	intronic	IHO1	.	.	.
10	rs4955427	3	49260646	C	T	0.2346	1.222e-09	6.077	1.722e-05	0.00722	0.03076	0.07293	8.07421e-07	intronic	IHO1	.	.	.
10	rs2099526	3	49269758	G	T	0.2435	4.837e-10	-6.224	1.337e-05	0.00601	0.03615	0.06965	8.18333e-07	intronic	IHO1	.	.	.
10	rs7619016	3	49272589	C	T	0.2425	3.817e-10	-6.261	2.595e-05	0.004822	0.03155	0.06831	8.11652e-07	intronic	IHO1	.	.	.
10	rs11130186	3	49275828	G	A	0.2435	3.379e-10	6.28	1.098e-05	0.005386	0.03333	0.07089	6.77033e-07	intronic	IHO1	.	.	.
10	rs10154992	3	49276077	C	T	0.2435	3.475e-10	-6.276	1.132e-05	0.005444	0.03317	0.06688	7.96416e-07	intronic	IHO1	.	.	.
10	rs12637346	3	49284513	G	A	0.2435	3.939e-10	6.256	1.165e-05	0.005625	0.03159	0.06994	9.63629e-07	intronic	IHO1	.	.	.
10	rs4955443	3	49286618	G	T	0.2435	4.08e-10	6.251	1.232e-05	0.005826	0.03316	0.06978	8.12793e-07	intronic	IHO1	.	.	.
10	rs7626076	3	49298139	G	A	0.2425	2.394e-10	-6.334	1.123e-05	0.005268	0.03382	0.06005	8.10924e-07	ncRNA_exonic	ENSG00000225399	.	.	.
10	rs4955417	3	49298205	C	T	0.2435	3.593e-10	6.271	9.279e-06	0.005923	0.03615	0.08094	8.02029e-07	ncRNA_exonic	ENSG00000225399	.	.	.
10	rs11130187	3	49307872	C	T	0.2445	2.288e-10	6.341	8.343e-06	0.005779	0.03152	0.06719	8.03138e-07	UTR3	C3orf62	ENST00000343010.8_9:c.*741G>A	.	.
10	rs6809851	3	49309787	C	A	0.2435	2.574e-09	-5.957	1.103e-05	0.005756	0.06649	0.07272	1.52908e-06	intronic	C3orf62	.	.	.
10	rs6778080	3	49317338	C	T	0.2435	1.673e-10	6.389	5.639e-06	0.005628	0.02796	0.074	7.69768e-07	intronic	USP4	.	.	.
10	rs4554002	3	49337120	C	T	0.4324	3.763e-08	-5.502	5.077e-05	0.01649	0.0003876	0.3233	0.00206296	intronic	USP4	.	.	.	y
10	rs11710434	3	49346130	C	T	0.2306	2.964e-10	6.301	2.442e-06	0.009514	0.01266	0.1249	8.55323e-06	intronic	USP4	.	.	.
10	rs9860285	3	49355374	G	T	0.2296	7.124e-10	-6.163	3.64e-06	0.009624	0.01025	0.137	8.35584e-06	intronic	USP4	.	.	.
10	rs11720542	3	49357427	G	A	0.2306	3.686e-10	6.267	3.005e-06	0.009011	0.01353	0.1351	8.34776e-06	intronic	USP4	.	.	.
10	rs6795772	3	49365269	C	T	0.4334	3.951e-08	-5.493	2.845e-05	0.01818	0.0009205	0.3502	0.00219114	intronic	USP4	.	.	.
10	rs13088309	3	49368317	G	A	0.2336	4.072e-10	6.251	2.981e-06	0.008267	0.009997	0.07141	8.67501e-06	intronic	USP4	.	.	.
10	rs6809204	3	49369383	C	T	0.2336	1.871e-10	-6.372	2.677e-06	0.008956	0.01441	0.08592	3.01502e-06	intronic	USP4	.	.	.
10	rs4955430	3	49378088	G	A	0.2336	6.496e-10	-6.178	2.367e-06	0.008315	0.01151	0.08454	8.70522e-06	upstream	USP4	dist=602	.	.
10	rs6784203	3	49381678	C	T	0.2336	3.272e-10	-6.285	2.941e-06	0.008897	0.01443	0.08455	8.84851e-06	intergenic	USP4;GPX1	dist=4192;dist=12929	.	.
10	rs4955424	3	49383078	G	A	0.2326	3.864e-10	6.259	3.224e-06	0.008665	0.01243	0.1431	8.39383e-06	intergenic	USP4;GPX1	dist=5592;dist=11529	.	.
10	rs4955425	3	49383178	G	A	0.2336	3.651e-10	6.268	2.874e-06	0.009499	0.01507	0.08565	8.4155e-06	intergenic	USP4;GPX1	dist=5692;dist=11429	.	.
10	rs4955440	3	49388633	C	T	0.2316	2.382e-10	6.334	3.097e-06	0.00766	0.01123	0.08839	8.66423e-06	intergenic	USP4;GPX1	dist=11147;dist=5974	.	.
10	rs11720657	3	49392620	G	A	0.2316	2.39e-10	6.334	2.64e-06	0.007681	0.012	0.09254	8.05137e-06	intergenic	USP4;GPX1	dist=15134;dist=1987	.	.
10	rs6790105	3	49393409	C	T	0.2326	1.002e-09	-6.109	3.607e-06	0.008802	0.01273	0.09359	8.04359e-06	intergenic	USP4;GPX1	dist=15923;dist=1198	.	.
10	rs3448	3	49396751	C	T	0.2316	2.294e-10	6.34	2.738e-06	0.00758	0.01257	0.08171	8.41938e-06	UTR3	RHOA	ENST00000422781.6_6:c.*1048G>A;ENST00000678200.1_2:c.*891G>A;ENST00000454011.7_6:c.*1079G>A;ENST00000678921.2_5:c.*3172G>A;ENST00000676712.2_5:c.*891G>A;ENST00000418115.6_6:c.*891G>A	.	.
10	rs974495	3	49400482	C	T	0.2326	1.797e-09	6.015	4.676e-06	0.008738	0.01337	0.09227	7.75497e-06	intronic	ENSG00000290318;RHOA	.	.	.
10	rs6446262	3	49401153	C	T	0.2316	5.757e-10	6.197	3.445e-06	0.008226	0.01391	0.08425	7.9704e-06	intronic	ENSG00000290318;RHOA	.	.	.
10	rs11130190	3	49402137	C	T	0.2316	2.471e-10	6.329	2.733e-06	0.007654	0.01332	0.08425	7.95738e-06	intronic	ENSG00000290318;RHOA	.	.	.
10	rs9812360	3	49402351	C	T	0.2316	5.159e-10	6.214	3.438e-06	0.008151	0.01314	0.08115	7.94859e-06	intronic	ENSG00000290318;RHOA	.	.	.
10	rs4955413	3	49410066	C	A	0.2316	2.777e-10	6.311	2.76e-06	0.007672	0.01475	0.08468	7.93725e-06	intronic	ENSG00000290318;RHOA	.	.	.
10	rs6769744	3	49412015	C	T	0.2326	3.926e-10	-6.257	3.742e-06	0.008927	0.01498	0.08732	7.93725e-06	intronic	ENSG00000290318;RHOA	.	.	.
10	rs6775069	3	49412496	G	A	0.2326	4.207e-10	6.246	3.736e-06	0.009521	0.01517	0.08733	7.93725e-06	intronic	ENSG00000290318;RHOA	.	.	.
10	rs9842132	3	49427933	G	A	0.2316	5.73e-10	6.198	2.717e-06	0.008004	0.01255	0.08484	1.28053e-05	intronic	ENSG00000290318;RHOA	.	.	.
10	rs62259944	3	49430883	G	A	0.2316	1.786e-09	6.016	2.8e-06	0.009427	0.01386	0.1049	1.02127e-05	intronic	ENSG00000290318;RHOA	.	.	.
10	rs10155014	3	49432321	C	T	0.2326	4.778e-10	-6.226	4.353e-06	0.01066	0.01258	0.08813	1.02117e-05	intronic	ENSG00000290318;RHOA	.	.	.
10	rs9861027	3	49436584	C	T	0.2316	4.253e-10	6.244	3.242e-06	0.007911	0.01167	0.07977	7.92903e-06	intronic	ENSG00000290318;RHOA	.	.	.
10	rs7648995	3	49438803	C	T	0.2316	1.493e-10	6.406	3.456e-06	0.007911	0.01276	0.0841	7.92903e-06	intronic	ENSG00000290318;RHOA	.	.	.
10	rs2140270	3	49439440	G	A	0.2316	1.46e-10	-6.409	3.471e-06	0.007911	0.01245	0.08416	7.92903e-06	intronic	ENSG00000290318;RHOA	.	.	.	y
10	rs62259947	3	49439924	C	T	0.2316	1.01e-09	-6.108	4.318e-06	0.008446	0.01211	0.08194	7.92903e-06	intronic	ENSG00000290318;RHOA	.	.	.
10	rs13096474	3	49443081	C	T	0.2326	3.695e-10	6.266	3.092e-06	0.01067	0.01325	0.08837	7.85398e-06	intronic	ENSG00000290318;RHOA	.	.	.
10	rs13061396	3	49444904	C	T	0.2326	6.669e-10	6.174	3.162e-06	0.01059	0.007498	0.6605	7.89423e-06	intronic	ENSG00000290318;RHOA	.	.	.
10	rs73088137	3	49448423	G	A	0.2316	9.901e-10	6.111	4.728e-06	0.008285	0.01252	0.08405	7.89369e-06	intronic	ENSG00000290318;RHOA	.	.	.
10	rs940045	3	49449638	G	A	0.2326	6.304e-10	-6.183	5.48e-06	0.01089	0.01303	0.08708	7.89423e-06	intronic	RHOA	.	.	.
10	rs7620024	3	49451691	G	A	0.2316	2.887e-10	6.305	3.832e-06	0.00813	0.01219	0.08544	7.89369e-06	intronic	TCTA	.	.	.
10	rs1464569	3	49460350	G	A	0.2326	4.153e-10	6.248	6.303e-06	0.01069	0.01198	0.07627	7.98656e-06	UTR3	NICN1	ENST00000273598.8_7:c.*1916C>T	.	.
10	rs8897	3	49460407	C	T	0.2316	5.841e-10	6.195	4.72e-06	0.008405	0.0113	0.08743	7.89369e-06	UTR3	NICN1	ENST00000273598.8_7:c.*1859G>A;ENST00000615713.4_6:c.*1203G>A	.	.
10	rs6446275	3	49466871	G	A	0.2316	5.632e-10	-6.2	4.395e-06	0.007966	0.01118	0.09173	7.89369e-06	upstream	ENSG00000283189;NICN1	dist=112	.	.
10	rs62259933	3	49469703	G	A	0.2316	3.577e-10	6.271	6.143e-06	0.007975	0.01068	0.09375	7.89369e-06	intergenic	NICN1;DAG1	dist=2944;dist=36443	.	.
10	rs9654010	3	49480908	C	T	0.2316	1.695e-09	-6.025	7.034e-06	0.007874	0.01102	0.09374	7.47498e-06	intergenic	NICN1;DAG1	dist=14149;dist=25238	.	.
10	rs57273516	3	49483074	G	A	0.2326	2.045e-09	5.994	1.018e-05	0.01082	0.00893	0.09678	7.47257e-06	intergenic	NICN1;DAG1	dist=16315;dist=23072	.	.
10	rs138084484	3	49483193	C	T	0.2306	1.196e-09	6.081	5.019e-06	0.007651	0.0101	0.08751	7.47498e-06	intergenic	NICN1;DAG1	dist=16434;dist=22953	.	.
10	rs11923032	3	49484992	C	T	0.2326	4.151e-09	5.878	9.831e-06	0.01071	0.008269	0.0948	5.67401e-06	intergenic	NICN1;DAG1	dist=18233;dist=21154	.	.
10	rs4855869	3	49488984	C	T	0.2326	2.137e-10	6.351	6.372e-06	0.01039	0.00416	0.6731	7.47257e-06	intergenic	NICN1;DAG1	dist=22225;dist=17162	.	.
10	rs113741748	3	49490780	G	A	0.2316	2.2e-10	6.347	6.886e-06	0.007594	0.007992	0.09399	7.09643e-06	intergenic	NICN1;DAG1	dist=24021;dist=15366	.	.
10	rs2329025	3	49496263	G	A	0.2326	4.745e-09	-5.856	6.653e-06	0.01038	0.01118	0.09551	7.09267e-06	intergenic	NICN1;DAG1	dist=29504;dist=9883	.	.
10	rs9860055	3	49506900	C	T	0.2316	1.105e-09	6.093	4.074e-06	0.007553	0.009679	0.09302	9.95291e-06	intronic	DAG1	.	.	.
10	rs7613491	3	49508976	C	T	0.2316	1.836e-09	-6.012	5.318e-06	0.008912	0.01244	0.09315	1.00136e-05	intronic	DAG1	.	.	.
10	rs7647973	3	49510931	G	A	0.2336	6.427e-09	5.805	8.156e-06	0.008679	0.01445	0.09242	9.97424e-06	intronic	DAG1	.	.	.
10	rs9809237	3	49516350	G	A	0.2326	7.329e-10	-6.159	7.834e-06	0.01214	0.01055	0.09748	8.92791e-06	intronic	DAG1	.	.	.
10	rs7355800	3	49516519	C	T	0.2316	5.692e-10	6.199	6.987e-06	0.008581	0.01074	0.0962	1.11988e-05	intronic	DAG1	.	.	.
10	rs1009051	3	49521549	G	A	0.2326	2.267e-09	-5.977	9.636e-06	0.01153	0.01484	0.09826	8.86952e-06	intronic	DAG1	.	.	.
10	rs62261183	3	49522458	C	T	0.2316	5.865e-10	6.194	7.509e-06	0.008614	0.01162	0.09627	9.32932e-06	intronic	DAG1	.	.	.
10	rs4855858	3	49529601	G	T	0.2326	1.737e-09	-6.021	8.031e-06	0.0115	0.01401	0.09785	8.85748e-06	intronic	DAG1	.	.	.
10	rs74471041	3	49542543	G	T	0.2316	1.198e-09	-6.08	1.472e-05	0.007238	0.009631	0.1002	9.41348e-06	intronic	DAG1	.	.	.
10	rs7644148	3	49545241	G	A	0.2316	1.48e-09	6.047	1.59e-05	0.008434	0.01011	0.09999	9.41348e-06	intronic	DAG1	.	.	.
10	rs3905330	3	49550774	G	A	0.2326	1.635e-09	6.03	1.763e-05	0.01143	0.008986	0.106	9.39399e-06	intronic	DAG1	.	.	.
10	rs11130207	3	49611666	G	T	0.1471	3.669e-08	5.506	0.0009277	0.1404	0.000266	0.4438	0.000658522	intronic	BSN	.	.	.	y
10	rs4241405	3	49642027	C	T	0.1461	4.885e-08	-5.455	0.0004891	0.1478	0.0003288	0.08867	0.000501083	intronic	BSN	.	.	.
11	rs421983	3	84892866	C	T	0.494	3.258e-08	5.527	7.375e-06	0.005249	0.04475	0.08893	0.000786285	ncRNA_intronic	LINC00971	.	.	.	y
11	rs1694933	3	84951716	C	A	0.4901	3.692e-08	-5.505	7.01e-06	0.004629	0.04783	0.1166	0.000912389	intergenic	LINC02025;AC132660.1	dist=9189;dist=3114	.	.
12	rs10511087	3	85439136	G	A	0.3787	2.168e-08	5.598	1.247e-08	0.006685	0.001278	0.1435	0.791486	intronic	CADM2	.	.	.
12	rs12638482	3	85454815	C	T	0.3807	3.259e-08	-5.527	1.304e-08	0.005062	0.0009783	0.1416	0.774116	intronic	CADM2	.	.	.
12	rs1549979	3	85460131	C	T	0.3807	3.871e-08	-5.497	2.476e-08	0.004949	0.0008758	0.1449	0.765149	intronic	CADM2	.	.	.
12	rs4856569	3	85464125	G	A	0.3807	3.02e-08	5.54	1.091e-08	0.005304	0.0008549	0.1451	0.777129	intronic	CADM2	.	.	.
12	rs2053108	3	85467972	C	A	0.3807	3.867e-08	-5.497	1.537e-08	0.005757	0.0007756	0.1586	0.789985	intronic	CADM2	.	.	.
12	rs6808400	3	85468059	C	T	0.3807	3.474e-08	5.516	1.639e-08	0.005683	0.0007105	0.1533	0.773715	intronic	CADM2	.	.	.
12	rs60311538	3	85470687	G	T	0.3807	3.156e-08	5.533	1.523e-08	0.004288	0.0008193	0.1528	0.791172	intronic	CADM2	.	.	.
12	rs7650284	3	85472227	C	T	0.3807	3.861e-08	5.497	1.269e-08	0.006558	0.0006947	0.163	0.787757	intronic	CADM2	.	.	.
12	rs12637461	3	85488353	G	T	0.3807	4.863e-08	-5.456	7.352e-09	0.004843	0.0006117	0.1555	0.777267	intronic	CADM2	.	.	.
12	rs1865251	3	85489069	C	A	0.3807	4.751e-08	5.46	7.704e-09	0.004832	0.0006048	0.1522	0.774603	intronic	CADM2	.	.	.
12	rs4856572	3	85494419	C	T	0.3807	4.548e-08	5.468	7.087e-09	0.00491	0.0005858	0.1515	0.774216	intronic	CADM2	.	.	.
12	rs2033526	3	85496758	C	A	0.3807	4.461e-08	5.472	8.133e-09	0.004946	0.0005614	0.1491	0.762999	intronic	CADM2	.	.	.
12	rs993716	3	85502591	C	T	0.3807	4.964e-08	-5.453	7.547e-09	0.0061	0.0004375	0.1933	0.702776	intronic	CADM2	.	.	.
12	rs6762267	3	85513115	C	A	0.3807	4.986e-08	-5.452	7.174e-09	0.004316	0.0004812	0.2	0.766279	intronic	CADM2	.	.	.
12	rs62250713	3	85513793	G	A	0.3668	8.948e-09	5.75	1.456e-09	0.0009607	0.0001317	0.3292	0.783247	intronic	CADM2	.	.	.	y
12	rs11127893	3	85524170	C	T	0.3519	4.881e-08	-5.456	5.141e-09	0.001054	0.0001504	0.5678	0.717358	intronic	CADM2	.	.	.
12	rs12637791	3	85525323	G	T	0.3519	4.359e-08	5.476	5.51e-09	0.001194	0.0001422	0.5097	0.719126	intronic	CADM2	.	.	.
12	rs7647981	3	85539078	G	A	0.3519	1.737e-08	5.636	8.781e-09	0.0009288	0.0002018	0.5405	0.717307	intronic	CADM2	.	.	.
12	rs67416405	3	85539234	C	T	0.3519	1.93e-08	5.618	9.659e-09	0.001059	0.0002011	0.5359	0.717307	intronic	CADM2	.	.	.
12	rs57755423	3	85540764	C	A	0.3519	1.89e-08	5.622	1.06e-08	0.0009363	0.0002084	0.5362	0.717315	intronic	CADM2	.	.	.
12	rs1551044	3	85544283	C	T	0.3519	1.826e-08	5.628	1.12e-08	0.0009437	0.0001923	0.5298	0.722362	intronic	CADM2	.	.	.
12	rs10433499	3	85546701	C	T	0.3519	2.234e-08	-5.593	1.207e-08	0.001138	0.000206	0.5451	0.705749	intronic	CADM2	.	.	.
12	rs12638798	3	85551820	C	T	0.3519	2.049e-08	5.608	1.324e-08	0.0009793	0.0001437	0.5648	0.747997	intronic	CADM2	.	.	.
12	rs4637303	3	85552787	C	T	0.3519	1.908e-08	-5.62	1.142e-08	0.001125	0.0001474	0.5353	0.748094	intronic	CADM2	.	.	.
12	rs11127897	3	85561808	C	T	0.3519	2.057e-08	5.607	1.739e-08	0.0009539	0.00016	0.5222	0.745439	intronic	CADM2	.	.	.
12	rs17455991	3	85565494	C	T	0.3519	3.698e-08	5.505	1.514e-08	0.0009845	0.0001739	0.5449	0.745659	intronic	CADM2	.	.	.
12	rs1992967	3	85569068	G	A	0.3519	3.57e-08	-5.511	1.877e-08	0.0009413	0.0001571	0.5372	0.745652	intronic	CADM2	.	.	.
12	rs12491722	3	85575797	C	T	0.3519	3.623e-08	5.508	1.712e-08	0.0009226	0.0001792	0.5317	0.745647	intronic	CADM2	.	.	.
12	rs10511078	3	85578035	G	A	0.3519	3.706e-08	-5.504	1.786e-08	0.0009538	0.0001554	0.5542	0.745652	intronic	CADM2	.	.	.
12	rs12633657	3	85578841	C	A	0.3519	2.152e-08	-5.599	1.736e-08	0.0009558	0.0001521	0.5449	0.745604	intronic	CADM2	.	.	.
12	rs62252508	3	85582231	G	A	0.3519	2.665e-08	-5.562	1.657e-08	0.0009553	0.000159	0.5474	0.74547	intronic	CADM2	.	.	.
12	rs12629607	3	85583608	C	T	0.3489	3.139e-08	5.534	7.89e-09	0.002127	0.0002126	0.5315	0.735988	intronic	CADM2	.	.	.
12	rs6807666	3	85594428	C	A	0.3519	2.498e-08	5.573	1.45e-08	0.0009685	0.0001713	0.5275	0.745283	intronic	CADM2	.	.	.
12	rs2326319	3	85597135	G	A	0.3519	1.853e-08	-5.625	1.234e-08	0.001062	0.0001598	0.6631	0.736923	intronic	CADM2	.	.	.
12	rs6549035	3	85599067	C	T	0.3519	1.521e-08	5.659	1.38e-08	0.001049	0.0001689	0.555	0.767535	intronic	CADM2	.	.	.
12	rs62253967	3	85599588	G	A	0.3519	2.464e-08	-5.576	1.443e-08	0.001059	0.0001823	0.5354	0.767535	intronic	CADM2	.	.	.
12	rs62253968	3	85599601	C	T	0.3519	2.461e-08	5.576	1.439e-08	0.001059	0.0001823	0.5354	0.767535	intronic	CADM2	.	.	.
12	rs2029134	3	85603262	G	T	0.3519	1.767e-08	5.633	1.461e-08	0.001049	0.0001951	0.5682	0.737091	intronic	CADM2	.	.	.
12	rs7618494	3	85603309	G	A	0.3519	2.071e-08	5.606	1.315e-08	0.001231	0.0001589	0.5167	0.734744	intronic	CADM2	.	.	.
12	rs7640828	3	85603371	G	A	0.3519	1.745e-08	-5.636	1.352e-08	0.001058	0.0002009	0.5684	0.734632	intronic	CADM2	.	.	.
12	rs7652683	3	85603462	C	T	0.3489	2.006e-08	5.611	6.361e-09	0.002214	0.0001323	0.5135	0.725139	intronic	CADM2	.	.	.
12	rs7652808	3	85603643	G	T	0.3489	1.985e-08	5.613	6.743e-09	0.002209	0.000142	0.4918	0.725371	intronic	CADM2	.	.	.
12	rs60541362	3	85610855	G	A	0.3519	2.792e-08	5.554	1.653e-08	0.001019	0.0002162	0.4669	0.712947	intronic	CADM2	.	.	.
12	rs56031423	3	85614034	C	T	0.3519	4.492e-08	-5.47	1.735e-08	0.001028	0.0001969	0.4758	0.712907	intronic	CADM2	.	.	.
12	rs17023019	3	85614272	G	A	0.3519	4.544e-08	5.468	1.573e-08	0.001034	0.0002205	0.4772	0.712904	intronic	CADM2	.	.	.
12	rs1551042	3	85630551	C	A	0.3509	1.626e-08	5.648	1.06e-08	0.00148	0.0001896	0.4655	0.67482	intronic	CADM2	.	.	.
12	rs6782190	3	85639672	G	A	0.3509	2.059e-08	-5.607	2.496e-08	0.001598	0.0001343	0.4717	0.695988	intronic	CADM2	.	.	.
13	rs13126505	4	102865304	G	A	0.06163	4.404e-08	-5.474	1.065e-17	0.05145	0.5632	0.1551	0.21593	intronic	BANK1	.	.	.
13	rs13109404	4	102896591	G	T	0.06163	7.634e-09	5.776	1.246e-18	0.04994	0.5964	0.1182	0.157047	intronic	BANK1	.	.	.	y
14	rs72678859	4	112406961	C	T	0.1531	2.709e-08	-5.559	0.0001916	2.041e-05	0.1057	0.0006184	0.14149	intergenic	ENSG00000288692;ENSG00000248656	dist=99571;dist=30312	.	.
14	rs72678864	4	112422145	G	A	0.1521	5.192e-09	-5.841	0.0002111	3.475e-05	0.1057	0.0003855	0.138885	intergenic	ENSG00000288692;ENSG00000248656	dist=114755;dist=15128	.	.	y
14	rs3934797	4	112467612	G	A	0.172	1.251e-08	-5.693	0.0001552	4.312e-05	0.1018	0.004804	0.111315	ncRNA_intronic	ENSG00000248656	.	.	.
14	rs11729080	4	112503872	G	A	0.1521	1.513e-08	-5.66	0.0001454	1.973e-05	0.1213	0.0003277	0.131946	ncRNA_intronic	ENSG00000248656	.	.	.
15	rs4413540	5	30814680	C	T	0.4225	4.544e-08	5.468	0.0218	0.0189	0.006642	0.0268	5.10928e-05	intergenic	ENSG00000287940;ENSG00000289601	dist=70869;dist=277749	.	.	y
16	rs71627577	5	43125795	G	A	0.1183	2.731e-10	6.313	9.648e-06	0.5525	0.01734	1.031e-05	0.00168473	intronic	ZNF131	.	.	.	y
16	rs71627581	5	43161351	G	A	0.1193	5.439e-10	-6.206	2.987e-06	0.5127	0.02414	5.031e-05	0.000958429	exonic	ZNF131	.	synonymous SNV	ZNF131:ENST00000509634.5_3:exon4:c.G372A:p.R124R,ZNF131:ENST00000306938.8_3:exon5:c.G372A:p.R124R,ZNF131:ENST00000505606.6_3:exon5:c.G372A:p.R124R,ZNF131:ENST00000509156.5_3:exon5:c.G372A:p.R124R,ZNF131:ENST00000682664.1_1:exon5:c.G372A:p.R124R
17	rs40506	5	60525210	C	T	0.498	2.241e-08	5.592	0.005809	0.00421	8.033e-06	0.07784	0.114746	ncRNA_intronic	LINC02057;SMIM15-AS1	.	.	.	y
18	rs61258990	6	19278344	C	CT	0.07256	1.446e-08	-5.668	0.04754	0.33	0.001074	0.04691	9.61147e-06	intergenic	MIR548A1HG;ENSG00000231662	dist=604112;dist=12205	.	.	y
19	rs2073526	6	26374658	G	A	0.4115	3.826e-08	-5.499	0.04361	0.005105	0.0007247	0.1126	0.000115438	intronic	BTN3A2	.	.	.
19	rs1614887	6	26393021	G	A	0.4215	1.387e-08	-5.675	0.01955	0.001472	0.001677	0.0646	3.49994e-05	exonic	BTN2A2	.	synonymous SNV	BTN2A2:ENST00000482536.5_1:exon6:c.G768A:p.S256S,BTN2A2:ENST00000352867.6_1:exon7:c.G1050A:p.S350S,BTN2A2:ENST00000356709.9_3:exon8:c.G1398A:p.S466S,BTN2A2:ENST00000416795.6_1:exon8:c.G1398A:p.S466S
19	rs1796520	6	26410800	C	T	0.4384	3.591e-10	-6.271	0.03252	0.004397	7.608e-06	0.03487	3.26686e-05	intronic	BTN3A1	.	.	.	y
19	rs742090	6	26415637	C	A	0.4384	8.061e-10	6.144	0.03289	0.004336	8.692e-06	0.05115	6.09916e-05	downstream	BTN3A1	dist=201	.	.
19	rs1796521	6	26421392	C	T	0.4374	4.951e-10	6.221	0.03105	0.004293	9.786e-06	0.04759	3.73491e-05	upstream	BTN2A3P	dist=233	.	.
19	rs1796522	6	26422260	G	A	0.4374	1.801e-09	-6.015	0.03962	0.004065	1.034e-05	0.05568	3.60131e-05	ncRNA_intronic	BTN2A3P	.	.	.
19	rs1624440	6	26433329	G	A	0.4384	1.161e-09	-6.085	0.03768	0.003967	9.053e-06	0.03935	4.01772e-05	downstream	BTN2A3P	dist=718	.	.
19	rs3734540	6	26463321	C	A	0.4523	5.527e-10	-6.203	0.03529	0.003565	1.79e-06	0.03677	0.00033693	intronic	BTN2A1	.	.	.
19	rs1407045	6	26476155	G	A	0.4513	5.456e-10	-6.205	0.03505	0.003689	3.683e-06	0.06758	0.000295345	intronic	BTN2A1	.	.	.
19	rs12525684	6	26483910	C	A	0.4503	1.078e-09	-6.097	0.02743	0.003415	3.108e-06	0.09411	0.000302496	intergenic	BTN2A1;BTN1A1	dist=7061;dist=16621	.	.
19	rs1056668	6	26510605	C	T	0.4225	8.759e-09	5.753	0.05133	0.01507	2.388e-05	0.0767	0.000262633	UTR3	BTN1A1	ENST00000684113.1_1:c.*1203C>T;ENST00000244513.10_1:c.*1203C>T	.	.
19	rs35355150	6	26526039	G	A	0.4354	2.855e-08	5.55	0.0241	0.02159	1.689e-05	0.1282	0.000321292	ncRNA_exonic	HCG11	.	.	.
19	rs9295695	6	26528250	C	T	0.4414	4.083e-08	-5.487	0.01419	0.09966	1.145e-05	0.2432	0.000213088	downstream	HCG11	dist=618	.	.
19	rs9393731	6	26529374	C	T	0.4423	4.028e-08	5.49	0.01377	0.1006	1.153e-05	0.2394	0.00022046	intergenic	HCG11;HMGN4	dist=1742;dist=9220	.	.
19	rs9358954	6	26531178	G	A	0.4433	4.151e-08	-5.484	0.01381	0.1082	1.105e-05	0.2339	0.000220475	intergenic	HCG11;HMGN4	dist=3546;dist=7416	.	.
19	rs6913398	6	26540593	G	T	0.4423	3.787e-08	-5.5	0.01363	0.09811	1.121e-05	0.2387	0.000218363	intronic	HMGN4	.	.	.
19	rs10946837	6	26540844	G	A	0.4354	2.582e-08	5.568	0.02284	0.02182	1.607e-05	0.1259	0.00031209	intronic	HMGN4	.	.	.
19	rs9467782	6	26542773	G	A	0.4423	3.217e-08	5.529	0.01079	0.09965	1.193e-05	0.2269	0.00023663	intronic	HMGN4	.	.	.
19	rs9467783	6	26542894	C	T	0.4423	4.801e-08	5.459	0.002272	0.1	1.166e-05	0.2089	0.000220445	intronic	HMGN4	.	.	.
19	rs9461270	6	26544110	G	A	0.4423	3.458e-08	-5.517	0.01033	0.0859	2.385e-05	0.2134	0.000220445	intronic	HMGN4	.	.	.
19	rs4871	6	26545632	G	A	0.4423	2.74e-08	5.557	0.01161	0.09401	1.109e-05	0.2187	0.000210296	exonic	HMGN4	.	synonymous SNV	HMGN4:ENST00000377575.3_3:exon2:c.G198A:p.G66G
19	rs4573	6	26546808	C	T	0.4235	1.475e-08	-5.664	0.03607	0.01413	2.117e-05	0.07434	0.000220029	UTR3	HMGN4	ENST00000377575.3_3:c.*1101C>T	.	.
19	rs1884947	6	26553273	G	T	0.4165	2.231e-08	5.593	0.04411	0.01303	1.68e-05	0.09019	0.00209392	intergenic	HMGN4;ENSG00000284607	dist=6112;dist=16279	.	.
20	rs6929812	6	27384520	C	T	0.4274	3.155e-08	-5.533	0.01145	1.405e-06	0.01189	0.2583	0.011386	intergenic	ENSG00000271755;ZNF184	dist=9777;dist=34002	.	.
20	rs2064221	6	27388448	C	A	0.4344	3.004e-08	5.541	0.02014	2.059e-06	0.01286	0.1713	0.00827047	intergenic	ENSG00000271755;ZNF184	dist=13705;dist=30074	.	.	y
20	rs34185469	6	27391935	G	A	0.4344	3.033e-08	5.54	0.01961	1.957e-06	0.01391	0.1692	0.00827332	intergenic	ENSG00000271755;ZNF184	dist=17192;dist=26587	.	.
20	rs6926142	6	27395764	C	T	0.4364	4.239e-08	-5.481	0.02412	1.559e-06	0.01784	0.1701	0.00852982	intergenic	ENSG00000271755;ZNF184	dist=21021;dist=22758	.	.
20	rs7772160	6	27412386	C	T	0.4364	4.805e-08	5.458	0.02289	3.468e-06	0.02058	0.1471	0.00674016	intergenic	ENSG00000271755;ZNF184	dist=37643;dist=6136	.	.
21	rs3815455	7	75611756	C	T	0.3032	2.89e-08	-5.548	8.58e-06	0.0003676	0.01422	0.07902	0.181638	intronic	POR	.	.	.
21	rs41301394	7	75612803	C	T	0.2932	2.108e-08	-5.603	3.688e-06	0.0003449	0.0135	0.04094	0.261453	intronic	POR	.	.	.
21	rs17685	7	75616105	G	A	0.2893	2.436e-08	-5.578	2.896e-06	5.712e-05	0.00873	0.03732	0.427716	UTR3	POR	ENST00000706544.1_1:c.*306G>A;ENST00000461988.6_5:c.*306G>A;ENST00000706545.1_1:c.*306G>A;ENST00000706546.1_1:c.*306G>A;ENST00000706547.1_1:c.*306G>A;ENST00000394893.5_2:c.*542G>A;ENST00000475509.2_2:c.*306G>A;ENST00000439269.1_1:c.*306G>A	.	.
21	rs6467958	7	75622281	C	T	0.2863	4.327e-10	-6.242	3.391e-05	3.373e-05	0.001366	0.02473	0.240683	intronic	TMEM120A	.	.	.	y
21	rs8565	7	75630274	C	T	0.2873	6.34e-09	-5.808	5.545e-05	3.76e-05	0.003036	0.04126	0.231029	exonic	STYXL1	.	synonymous SNV	STYXL1:ENST00000340062.9_5:exon6:c.A456A:p.Q152Q,STYXL1:ENST00000360591.7_5:exon6:c.A456A:p.Q152Q,STYXL1:ENST00000248600.5_4:exon8:c.A744A:p.Q248Q,STYXL1:ENST00000359697.8_6:exon8:c.A744A:p.Q248Q,STYXL1:ENST00000431581.5_4:exon8:c.A744A:p.Q248Q,STYXL1:ENST00000451157.1_4:exon8:c.A744A:p.Q248Q
21	rs3823882	7	75631913	C	T	0.2873	9.545e-09	-5.739	5.495e-05	3.685e-05	0.003386	0.03956	0.244649	intronic	STYXL1	.	.	.
21	rs6978677	7	75636240	C	T	0.2873	2.9e-08	-5.547	5.618e-05	3.751e-05	0.003432	0.04658	0.236346	intronic	STYXL1	.	.	.
22	rs2396726	7	114021410	C	T	0.4423	2.28e-08	-5.589	0.02024	0.1264	2.776e-05	0.0489	0.000120182	intronic	FOXP2	.	.	.
22	rs13225495	7	114023767	G	A	0.4264	3.337e-08	5.523	0.1182	0.1545	5.976e-05	0.02764	5.94306e-05	intronic	FOXP2	.	.	.
22	rs13232831	7	114025385	C	A	0.4334	4.478e-08	-5.471	0.1359	0.1206	6.292e-05	0.04064	7.0081e-05	intronic	FOXP2	.	.	.
22	rs4730636	7	114032019	C	T	0.4334	3.426e-08	5.518	0.1565	0.1518	6.314e-05	0.03091	6.25201e-05	intronic	FOXP2	.	.	.
22	rs2894699	7	114059156	C	T	0.4851	1.787e-11	-6.722	0.02665	0.4844	2.676e-07	0.01348	1.29396e-05	ncRNA_intronic	ENSG00000224595	.	.	.
22	rs10262103	7	114091844	C	A	0.4851	4.353e-11	6.592	0.02832	0.5154	1.704e-07	0.01142	1.53024e-05	intronic	FOXP2	.	.	.
22	rs727644	7	114109349	G	A	0.4751	1.432e-11	-6.755	0.003179	0.5252	2.565e-08	0.002448	0.000101876	intronic	FOXP2	.	.	.
22	rs4727799	7	114110568	C	T	0.3926	6.457e-10	6.179	0.02527	0.8671	1.108e-07	0.0009845	0.0131744	intronic	FOXP2	.	.	.
22	rs7783012	7	114116881	G	A	0.4761	2.474e-12	7.005	0.006528	0.5911	1.035e-08	0.002639	7.44338e-05	intronic	FOXP2	.	.	.
22	rs2189010	7	114119430	G	A	0.4761	1.063e-13	7.433	0.004002	0.4914	2.507e-08	0.002512	9.68813e-05	intronic	FOXP2	.	.	.	y
22	rs10249234	7	114129137	G	A	0.4761	1.4e-11	6.758	0.00277	0.07203	4.332e-08	0.002558	9.55873e-05	intronic	FOXP2	.	.	.
22	rs1989903	7	114137940	G	A	0.4771	2.44e-12	-7.007	0.002233	0.06887	3.1e-08	0.002542	9.29544e-05	intronic	FOXP2	.	.	.
22	rs1015511	7	114142250	G	A	0.4761	2.268e-11	-6.688	0.002641	0.07724	9.844e-08	0.002326	0.000107823	intronic	FOXP2	.	.	.
22	rs10266297	7	114143407	C	T	0.4761	2.775e-11	6.658	0.002962	0.07696	1.152e-07	0.002574	9.91562e-05	intronic	FOXP2	.	.	.
22	rs6466488	7	114145525	G	A	0.4751	1.402e-11	6.758	0.003871	0.0774	6.132e-07	0.001448	0.000103459	intronic	FOXP2	.	.	.
22	rs2189015	7	114148243	G	A	0.4682	8.985e-13	-7.145	0.00661	0.3316	7.223e-07	0.002228	0.000130161	intronic	FOXP2	.	.	.
22	rs2396753	7	114148331	C	A	0.4682	7.922e-13	7.162	0.006756	0.3233	6.513e-07	0.002095	0.000129975	intronic	FOXP2	.	.	.
22	rs9969232	7	114158954	G	A	0.3936	1.369e-09	6.059	0.022	0.7562	2.014e-06	0.001666	0.0177828	intronic	FOXP2	.	.	.
22	rs6969376	7	114160871	G	A	0.4682	1.633e-10	6.392	0.1751	0.3126	8.949e-07	0.003256	0.000142102	intronic	FOXP2	.	.	.
22	rs6980093	7	114162740	G	A	0.4682	1.686e-10	6.387	0.176	0.3144	9.533e-07	0.003314	0.000134912	intronic	FOXP2	.	.	.
22	rs10262462	7	114180062	G	A	0.4652	3.804e-10	-6.262	0.2039	0.2963	2.014e-06	0.003485	0.000147052	intronic	FOXP2	.	.	.
22	rs7458242	7	114184098	G	A	0.4672	2.745e-10	6.313	0.2021	0.2513	1.629e-06	0.003072	0.000148044	intronic	FOXP2	.	.	.
22	rs1859100	7	114194615	G	T	0.4682	1.455e-09	-6.049	0.2224	0.304	2.146e-06	0.002889	0.000167363	intronic	FOXP2	.	.	.
22	rs1229760	7	114224163	G	A	0.3757	2.487e-08	-5.574	0.07411	0.9899	1.968e-06	0.00571	0.027359	intronic	FOXP2	.	.	.
23	rs10264648	7	114956168	C	T	0.3161	3.876e-08	5.496	1.29e-06	0.9458	0.09023	0.01897	0.0040438	intergenic	LINC01392;SNORA25	dist=84759;dist=265201	.	.	y
24	rs11772832	7	135073047	C	T	0.3966	7.559e-09	-5.778	5.426e-05	1.529e-05	0.02223	0.7272	6.21298e-05	UTR3	CNOT4	ENST00000428680.6_6:c.*499G>A;ENST00000315544.6_6:c.*499G>A;ENST00000707064.1_1:c.*499G>A	.	.
24	rs3812281	7	135082751	C	T	0.3966	2.653e-09	-5.952	8.472e-05	1.529e-05	0.01969	0.6826	5.99239e-05	intronic	CNOT4	.	.	.
24	rs2718167	7	135093445	C	T	0.3956	6.036e-09	-5.816	5.615e-05	2.161e-05	0.007809	0.7015	6.30217e-05	intronic	CNOT4	.	.	.
24	rs2551778	7	135099649	C	T	0.3956	4.981e-09	-5.848	5.661e-05	2.561e-05	0.009898	0.7471	6.52589e-05	intronic	CNOT4	.	.	.
24	rs2551777	7	135100476	C	T	0.3956	2.581e-09	-5.956	4.809e-05	2.855e-05	0.008951	0.7583	6.25173e-05	intronic	CNOT4	.	.	.	y
24	rs2696880	7	135115138	G	A	0.3976	6.399e-09	-5.806	5.818e-05	3.076e-05	0.01025	0.7558	7.65755e-05	intronic	CNOT4	.	.	.
24	rs2551774	7	135119417	G	A	0.3976	1.429e-08	5.67	7.629e-05	3.426e-05	0.009858	0.809	5.72493e-05	intronic	CNOT4	.	.	.
24	rs2696881	7	135119831	C	T	0.3966	3.717e-09	-5.896	6.562e-05	2.745e-05	0.00993	0.7507	6.61302e-05	intronic	CNOT4	.	.	.
24	rs2551773	7	135120196	G	A	0.3936	4.036e-09	5.883	7.377e-05	3.013e-05	0.01042	0.7927	0.000126189	intronic	CNOT4	.	.	.
24	rs2551767	7	135139011	C	T	0.3966	5.913e-09	-5.819	3.868e-05	1.995e-05	0.02702	0.6841	9.13335e-05	intronic	CNOT4	.	.	.
24	rs2551765	7	135142459	C	T	0.4046	2.675e-08	-5.561	7.332e-05	7.44e-05	0.04197	0.6912	9.80054e-05	intronic	CNOT4	.	.	.
24	rs1559535	7	135143971	G	A	0.4046	4.135e-08	-5.485	0.000169	7.459e-05	0.04532	0.675	8.90656e-05	intronic	CNOT4	.	.	.
24	rs2696884	7	135144662	C	T	0.3956	9.745e-09	5.735	4.697e-05	2.468e-05	0.02897	0.7763	8.92689e-05	intronic	CNOT4	.	.	.
25	rs7844067	8	93026078	C	T	0.2376	3.517e-08	-5.514	0.0005123	0.4382	0.01596	0.04356	8.56643e-05	intronic	RUNX1T1	.	.	.
25	rs11779617	8	93034215	G	A	0.2356	8.537e-09	-5.758	0.0005977	0.4845	0.006198	0.01853	7.6535e-05	intronic	RUNX1T1	.	.	.
25	rs13250170	8	93035331	G	A	0.2356	3.335e-08	5.523	0.0007624	0.5905	0.01156	0.02942	7.65332e-05	intronic	RUNX1T1	.	.	.
25	rs9297901	8	93036795	C	T	0.2366	8.026e-10	6.144	0.0007677	9.35e-05	0.01143	0.02892	7.65332e-05	intronic	RUNX1T1	.	.	.
25	rs9297902	8	93036884	C	T	0.2356	2.874e-08	5.549	0.0007865	0.6104	0.01061	0.02678	7.65332e-05	intronic	RUNX1T1	.	.	.
25	rs35604666	8	93037953	G	A	0.2356	2.55e-08	5.57	0.0008468	0.6132	0.007925	0.0283	8.56998e-05	intronic	RUNX1T1	.	.	.
25	rs55701498	8	93039932	C	T	0.2356	1.84e-08	-5.626	0.0007943	0.6117	0.008428	0.0215	7.65843e-05	intronic	RUNX1T1	.	.	.
25	rs6988317	8	93042221	G	A	0.2356	1.317e-08	5.684	0.0007903	0.5679	0.006726	0.01983	7.65209e-05	intronic	RUNX1T1	.	.	.
25	rs6992515	8	93042269	C	T	0.2356	1.528e-08	5.658	0.0007669	0.6242	0.007567	0.02028	7.65209e-05	intronic	RUNX1T1	.	.	.
25	rs11775644	8	93042425	C	A	0.2346	9.46e-09	-5.74	0.0008133	0.5088	0.004866	0.01869	7.65209e-05	intronic	RUNX1T1	.	.	.
25	rs11782927	8	93045726	C	T	0.2356	1.635e-08	5.647	0.0008285	0.6136	0.007762	0.02009	7.65279e-05	intronic	RUNX1T1	.	.	.
25	rs11785362	8	93045784	G	A	0.2356	1.283e-08	-5.688	0.0003816	0.5073	0.00527	0.01685	7.65279e-05	intronic	RUNX1T1	.	.	.
25	rs28373051	8	93047342	G	A	0.2356	1.877e-08	-5.623	0.0008076	0.5944	0.008332	0.02213	7.65738e-05	intronic	RUNX1T1	.	.	.
25	rs6986430	8	93048104	C	T	0.2356	3.156e-08	5.533	0.0008445	0.5572	0.009826	0.03103	7.6572e-05	intronic	RUNX1T1	.	.	.
25	rs4734170	8	93051254	C	T	0.2356	2.934e-08	-5.545	0.0008513	0.5596	0.01061	0.02675	7.55231e-05	intronic	RUNX1T1	.	.	.
25	rs4415366	8	93052634	G	A	0.2356	2.074e-08	5.606	0.0008355	0.638	0.009047	0.02142	7.6572e-05	intronic	RUNX1T1	.	.	.
25	rs72671424	8	93056264	G	A	0.2356	7.965e-11	6.501	0.000551	0.0001108	0.006429	0.01716	7.7809e-05	intronic	RUNX1T1	.	.	.	y
25	rs10441534	8	93056692	C	T	0.2356	3.942e-08	-5.493	0.0008228	0.6427	0.008735	0.02536	7.73909e-05	intronic	RUNX1T1	.	.	.
25	rs35983766	8	93056882	C	T	0.2356	3.961e-08	5.493	0.0008174	0.6427	0.008735	0.02561	7.73945e-05	intronic	RUNX1T1	.	.	.
25	rs7002565	8	93057196	C	A	0.2356	4.019e-08	5.49	0.0008447	0.6428	0.008747	0.02525	7.78861e-05	intronic	RUNX1T1	.	.	.
25	rs4735044	8	93057478	C	T	0.2356	1.387e-09	6.057	0.0008114	0.0001452	0.008849	0.02956	7.73945e-05	intronic	RUNX1T1	.	.	.
25	rs13259499	8	93057823	G	A	0.2356	3.273e-09	5.917	0.0005688	0.6317	0.006535	0.01458	7.73891e-05	intronic	RUNX1T1	.	.	.
25	rs36005889	8	93058638	C	A	0.2356	3.943e-08	5.493	0.0008393	0.643	0.00876	0.02494	7.73517e-05	intronic	RUNX1T1	.	.	.
25	rs4477079	8	93059038	C	T	0.2356	3.946e-08	-5.493	0.0008396	0.643	0.008757	0.02495	7.74034e-05	intronic	RUNX1T1	.	.	.
25	rs734113	8	93060095	C	T	0.2356	4.131e-08	5.485	0.0008447	0.6528	0.008632	0.02628	7.73963e-05	intronic	RUNX1T1	.	.	.
25	rs10089969	8	93060896	G	T	0.2356	4.027e-08	-5.49	0.0008851	0.6478	0.008714	0.02422	7.93524e-05	intronic	RUNX1T1	.	.	.
25	rs11990286	8	93061406	C	T	0.2356	3.874e-08	5.496	0.0008428	0.6529	0.00868	0.0245	7.74373e-05	intronic	RUNX1T1	.	.	.
25	rs28728418	8	93061878	G	A	0.2356	3.888e-08	5.496	0.0008435	0.653	0.008677	0.02456	7.7555e-05	intronic	RUNX1T1	.	.	.
25	rs6991006	8	93064270	G	A	0.2356	3.318e-08	-5.524	0.0008143	0.7159	0.00702	0.02553	7.78395e-05	intronic	RUNX1T1	.	.	.
26	rs1412073	9	12363025	C	T	0.4751	4.162e-08	-5.484	0.03588	0.00462	0.0006036	0.009494	0.0199811	intergenic	RNU2-47P;TYRP1	dist=62574;dist=330360	.	.
26	rs1412074	9	12363134	G	A	0.4751	4.694e-08	5.463	0.03732	0.005374	0.000683	0.008044	0.0203058	intergenic	RNU2-47P;TYRP1	dist=62683;dist=330251	.	.
26	rs2777016	9	12364375	C	T	0.4702	4.42e-08	-5.473	0.03224	0.002725	0.0007109	0.008553	0.0150571	intergenic	RNU2-47P;TYRP1	dist=63924;dist=329010	.	.
26	rs12338950	9	12364615	C	T	0.4702	4.937e-08	-5.454	0.1433	0.005219	0.0004998	0.007459	0.0175114	intergenic	RNU2-47P;TYRP1	dist=64164;dist=328770	.	.
26	rs2776987	9	12365789	G	A	0.4742	4.607e-08	5.466	0.01753	0.003704	0.0009284	0.01064	0.0176149	intergenic	RNU2-47P;TYRP1	dist=65338;dist=327596	.	.
26	rs10960638	9	12366588	G	T	0.4771	3.499e-08	5.514	0.03205	0.005693	0.0006031	0.0106	0.0198326	intergenic	RNU2-47P;TYRP1	dist=66137;dist=326797	.	.
26	rs1360463	9	12367532	G	A	0.4742	2.265e-08	5.59	0.01319	0.003151	0.0007564	0.006524	0.0176742	intergenic	RNU2-47P;TYRP1	dist=67081;dist=325853	.	.
26	rs7862509	9	12368599	C	T	0.4533	4.029e-08	-5.49	0.015	0.001859	0.002263	0.002164	0.043432	intergenic	RNU2-47P;TYRP1	dist=68148;dist=324786	.	.
26	rs10809759	9	12368977	C	T	0.4533	4.272e-08	-5.479	0.01527	0.001836	0.002302	0.002291	0.0435171	intergenic	RNU2-47P;TYRP1	dist=68526;dist=324408	.	.
26	rs12345339	9	12369424	C	T	0.4553	1.686e-08	-5.642	0.01118	0.001976	0.002345	0.001684	0.0430368	intergenic	RNU2-47P;TYRP1	dist=68973;dist=323961	.	.	y
26	rs56828920	9	12370930	G	A	0.4543	4.672e-08	5.463	0.01749	0.002336	0.001577	0.002638	0.0436144	intergenic	RNU2-47P;TYRP1	dist=70479;dist=322455	.	.
26	rs2776995	9	12371854	G	T	0.4742	4.469e-08	-5.471	0.01284	0.005987	0.0006763	0.009077	0.0197392	intergenic	RNU2-47P;TYRP1	dist=71403;dist=321531	.	.
26	rs2773857	9	12372356	C	T	0.4751	2.016e-08	5.611	0.01291	0.004016	0.0005116	0.007901	0.017862	intergenic	RNU2-47P;TYRP1	dist=71905;dist=321029	.	.
26	rs10809765	9	12372475	G	A	0.4553	4.171e-08	-5.483	0.01666	0.002475	0.00165	0.002616	0.0482547	intergenic	RNU2-47P;TYRP1	dist=72024;dist=320910	.	.
26	rs2183412	9	12373461	G	T	0.4732	2.556e-08	5.569	0.01373	0.005961	0.0006768	0.008638	0.0184154	intergenic	RNU2-47P;TYRP1	dist=73010;dist=319924	.	.
26	rs2773852	9	12375294	C	T	0.4732	4.45e-08	-5.472	0.01211	0.003802	0.0009083	0.01037	0.0184803	intergenic	RNU2-47P;TYRP1	dist=74843;dist=318091	.	.
26	rs2773848	9	12376007	G	A	0.4732	4.665e-08	5.464	0.01344	0.003548	0.001155	0.008416	0.018534	intergenic	RNU2-47P;TYRP1	dist=75556;dist=317378	.	.
26	rs10960654	9	12390370	C	T	0.4513	3.733e-08	-5.503	0.01504	0.003121	0.002435	0.00174	0.0585626	intergenic	RNU2-47P;TYRP1	dist=89919;dist=303015	.	.
27	rs398715	9	17076686	C	T	0.2137	2.101e-08	-5.604	5.023e-05	0.002593	0.001237	0.04533	0.128978	ncRNA_intronic	ENSG00000237153	.	.	.
27	rs405039	9	17076950	C	A	0.2137	9.973e-09	5.731	5.469e-05	0.002594	0.001059	0.03503	0.134359	ncRNA_intronic	ENSG00000237153	.	.	.	y
28	rs10986566	9	127873473	G	A	0.3082	3.141e-10	-6.292	0.001078	1.292e-07	0.03823	0.005636	0.0692612	intronic	SCAI	.	.	.
28	rs7033815	9	127880264	G	T	0.3082	6.678e-09	-5.799	0.001051	1.345e-07	0.03846	0.008069	0.0749514	intronic	SCAI	.	.	.
28	rs6478694	9	127881004	G	A	0.3082	6.357e-09	-5.807	0.001034	1.354e-07	0.03726	0.007979	0.0749514	intronic	SCAI	.	.	.
28	rs35935349	9	127886094	C	T	0.3082	3.033e-09	-5.93	0.000842	1.38e-07	0.03456	0.0073	0.0670857	intronic	SCAI	.	.	.
28	rs10819036	9	127890913	C	T	0.3082	1.3e-09	6.067	0.0006361	1.395e-07	0.0426	0.007369	0.0749514	intronic	SCAI	.	.	.
28	rs9650748	9	127901467	G	A	0.4513	1.32e-08	5.683	0.003038	4.064e-05	0.0106	0.00915	0.0524276	intronic	SCAI	.	.	.
28	rs9650749	9	127901470	C	T	0.4513	1.438e-08	5.669	0.002926	4.064e-05	0.01297	0.008342	0.0524276	intronic	SCAI	.	.	.
28	rs7024854	9	127902495	G	A	0.3082	1.174e-09	6.084	0.0005927	1.544e-07	0.0303	0.009483	0.0733348	intronic	SCAI	.	.	.
28	rs7042065	9	127903013	C	T	0.4513	1.478e-08	5.664	0.002531	3.95e-05	0.01144	0.009196	0.0512448	intronic	SCAI	.	.	.
28	rs972301	9	127903576	G	A	0.4513	1.26e-08	5.691	0.002045	3.744e-05	0.0107	0.009882	0.0524276	intronic	SCAI	.	.	.
28	rs7030645	9	127904271	G	A	0.3082	1.02e-09	-6.106	0.0004747	1.524e-07	0.02919	0.01011	0.0733348	intronic	SCAI	.	.	.
28	rs7024471	9	127906190	C	T	0.4523	7.393e-09	5.782	0.002118	4.136e-05	0.01324	0.00838	0.0539859	upstream	SCAI	dist=383	.	.
28	rs7024631	9	127906359	C	T	0.4523	7.124e-09	5.788	0.002161	4.132e-05	0.01303	0.00882	0.049768	upstream	SCAI	dist=552	.	.	y
28	rs4838247	9	127907917	C	T	0.4523	3.721e-08	5.504	0.001916	4.201e-05	0.01544	0.008976	0.0535365	downstream	PPP6C	dist=935	.	.
28	rs4838248	9	127908116	C	T	0.4523	1.058e-08	-5.721	0.001854	3.473e-05	0.01455	0.007886	0.054459	downstream	PPP6C	dist=736	.	.
28	rs2113352	9	127908306	G	T	0.4523	3.06e-08	5.538	0.001834	4.119e-05	0.0153	0.008529	0.0521327	downstream	PPP6C	dist=546	.	.
28	rs6744	9	127909069	C	T	0.4523	3.081e-08	-5.537	0.00191	4.149e-05	0.01477	0.008741	0.0515335	UTR3	PPP6C	ENST00000373547.9_5:c.*2883G>A;ENST00000415905.5_4:c.*2883G>A;ENST00000451402.5_4:c.*2883G>A	.	.
28	rs1549314	9	127910307	G	T	0.4523	2.989e-08	5.542	0.001944	3.914e-05	0.01484	0.008426	0.052212	UTR3	PPP6C	ENST00000373547.9_5:c.*1645C>A;ENST00000415905.5_4:c.*1645C>A;ENST00000451402.5_4:c.*1645C>A	.	.
28	rs1048251	9	127910498	G	T	0.4523	3.044e-08	-5.539	0.001938	4.012e-05	0.0152	0.008542	0.0507762	UTR3	PPP6C	ENST00000373547.9_5:c.*1454C>A;ENST00000415905.5_4:c.*1454C>A;ENST00000451402.5_4:c.*1454C>A	.	.
28	rs4838249	9	127911031	G	A	0.3101	2.82e-09	5.942	0.0003842	1.526e-07	0.03505	0.01024	0.0729306	UTR3	PPP6C	ENST00000373547.9_5:c.*921C>T;ENST00000415905.5_4:c.*921C>T;ENST00000451402.5_4:c.*921C>T	.	.
28	rs7869453	9	127912316	G	A	0.4523	3.085e-08	-5.537	0.001935	4.187e-05	0.01421	0.008891	0.0521207	intronic	PPP6C	.	.	.
28	rs7019234	9	127913764	G	A	0.4523	2.592e-08	5.567	0.002041	4.329e-05	0.01055	0.009368	0.0517774	intronic	PPP6C	.	.	.
28	rs7019470	9	127913837	C	T	0.4523	2.967e-08	-5.543	0.002	4.28e-05	0.01046	0.01161	0.0517488	intronic	PPP6C	.	.	.
28	rs10819037	9	127914865	C	T	0.4523	2.755e-08	-5.556	0.002001	4.215e-05	0.01201	0.008998	0.0521207	intronic	PPP6C	.	.	.
28	rs7867749	9	127915210	C	T	0.3091	2.875e-09	5.939	0.0003976	1.701e-07	0.0362	0.009158	0.073296	intronic	PPP6C	.	.	.
28	rs7852420	9	127915289	C	T	0.4523	2.45e-08	-5.577	0.001855	4.292e-05	0.01139	0.008791	0.0513228	intronic	PPP6C	.	.	.
28	rs7855700	9	127915421	G	A	0.3091	2.459e-09	-5.964	0.0003424	1.508e-07	0.03512	0.009471	0.072934	intronic	PPP6C	.	.	.
28	rs1517411	9	127916457	G	A	0.4523	2.406e-08	-5.58	0.001822	4.29e-05	0.01109	0.008823	0.0521567	intronic	PPP6C	.	.	.
28	rs7846942	9	127917311	G	T	0.4523	2.317e-08	5.586	0.001937	4.202e-05	0.011	0.007953	0.0531851	intronic	PPP6C	.	.	.
28	rs2416953	9	127920158	C	A	0.4523	1.737e-08	5.636	0.001774	3.599e-05	0.01353	0.008065	0.0571913	intronic	PPP6C	.	.	.
28	rs4837011	9	127923014	G	T	0.3091	6.02e-09	-5.816	0.0003493	1.575e-07	0.03589	0.1772	0.0729659	intronic	PPP6C	.	.	.
28	rs4837012	9	127924012	G	T	0.4483	1.002e-08	-5.73	0.001579	4.308e-05	0.01091	0.008976	0.0555636	intronic	PPP6C	.	.	.
28	rs10986598	9	127926190	G	T	0.3091	1.97e-09	-6	0.0003568	1.582e-07	0.02754	0.008245	0.078206	intronic	PPP6C	.	.	.
28	rs75179555	9	127926271	G	A	0.3091	2.884e-09	-5.938	0.0003495	1.575e-07	0.02715	0.008248	0.078206	intronic	PPP6C	.	.	.
28	rs4838252	9	127927268	G	A	0.3091	2.734e-09	-5.947	0.0003418	1.585e-07	0.02724	0.008251	0.0745933	intronic	PPP6C	.	.	.
28	rs7861650	9	127927686	C	A	0.4523	1.998e-08	-5.612	0.00171	3.711e-05	0.008613	0.008256	0.0650354	intronic	PPP6C	.	.	.
28	rs10986600	9	127928735	C	T	0.3091	2.889e-09	5.938	0.0004086	1.598e-07	0.0265	0.007942	0.0745933	intronic	PPP6C	.	.	.
28	rs12380566	9	127929132	C	T	0.3082	1.838e-09	-6.012	0.0004148	1.538e-07	0.02692	0.007448	0.0745933	intronic	PPP6C	.	.	.
28	rs10986603	9	127929938	G	T	0.3082	8.389e-10	6.137	0.0003501	1.774e-07	0.02665	0.007459	0.0769414	intronic	PPP6C	.	.	.
28	rs7852933	9	127932402	G	A	0.3091	3.496e-09	-5.906	0.0003969	1.655e-07	0.0309	0.008326	0.0746122	intronic	PPP6C	.	.	.
28	rs10986606	9	127933895	C	T	0.3091	3.074e-09	-5.928	0.0004025	1.567e-07	0.03069	0.006936	0.0772343	intronic	PPP6C	.	.	.
28	rs360005	9	127939471	G	A	0.4513	1.567e-08	5.654	0.001911	3.336e-05	0.01505	0.006292	0.0556083	intronic	PPP6C	.	.	.
28	rs360007	9	127939802	C	T	0.4513	9.099e-09	5.747	0.001892	3.82e-05	0.01221	0.006772	0.0532525	intronic	PPP6C	.	.	.
28	rs360008	9	127943869	G	A	0.4473	1.4e-08	-5.673	0.002049	5.176e-05	0.0147	0.006956	0.0542163	intronic	PPP6C	.	.	.
28	rs173391	9	127943982	C	T	0.4513	9.234e-09	-5.744	0.002211	3.973e-05	0.01268	0.005753	0.0566331	intronic	PPP6C	.	.	.
28	rs359574	9	127944978	G	T	0.3082	7.911e-10	-6.147	0.000442	1.789e-07	0.02842	0.007401	0.073838	intronic	PPP6C	.	.	.
28	rs165540	9	127946295	G	T	0.3082	9.932e-10	6.111	0.0004127	1.767e-07	0.03507	0.007632	0.075261	intronic	PPP6C	.	.	.
28	rs359576	9	127946320	C	T	0.4543	4.52e-08	-5.469	0.003712	3.112e-05	0.01672	0.008556	0.0536723	intronic	PPP6C	.	.	.
28	rs397583	9	127950184	G	A	0.4523	1.221e-08	5.697	0.002125	5.448e-05	0.01193	0.007382	0.0566318	intronic	PPP6C	.	.	.
28	rs466994	9	127951863	G	A	0.4513	1.338e-08	-5.681	0.002362	5.721e-05	0.01028	0.008225	0.0542575	exonic	PPP6C	.	synonymous SNV	PPP6C:ENST00000451402.5_4:exon1:c.C135T:p.F45F
28	rs459311	9	127952210	G	T	0.4513	1.198e-08	-5.7	0.00239	5.431e-05	0.01028	0.007316	0.0542425	UTR5	PPP6C	ENST00000415905.5_4:c.-213C>A;ENST00000451402.5_4:c.-213C>A	.	.
28	rs465689	9	127952746	C	T	0.4513	1.163e-08	5.705	0.002056	5.016e-05	0.01077	0.008164	0.0538096	upstream	PPP6C	dist=528	.	.
28	rs359586	9	127956325	G	A	0.4513	1.855e-08	5.625	0.002785	5.022e-05	0.01304	0.008918	0.0595539	intergenic	PPP6C;RABEPK	dist=4107;dist=6496	.	.
28	rs359584	9	127957070	G	A	0.4553	1.567e-08	5.654	0.002008	4.17e-05	0.01183	0.01388	0.0532451	intergenic	PPP6C;RABEPK	dist=4852;dist=5751	.	.
28	rs359583	9	127957393	C	T	0.4543	2.11e-08	5.603	0.003216	2.367e-05	0.0153	0.01494	0.0517702	intergenic	PPP6C;RABEPK	dist=5175;dist=5428	.	.
28	rs359582	9	127957425	C	T	0.4543	1.532e-08	-5.658	0.002507	2.251e-05	0.01429	0.01467	0.0495188	intergenic	PPP6C;RABEPK	dist=5207;dist=5396	.	.
28	rs420768	9	127959540	G	A	0.3101	1.318e-09	6.065	0.0006236	1.581e-07	0.02983	0.00953	0.0794273	intergenic	PPP6C;RABEPK	dist=7322;dist=3281	.	.
28	rs10760394	9	127962533	G	A	0.4533	4.023e-08	5.49	0.002888	3.11e-05	0.01291	0.01272	0.0501695	upstream	RABEPK	dist=288	.	.
28	rs6478699	9	127966470	G	A	0.4533	1.812e-08	-5.629	0.002213	2.727e-05	0.01403	0.01315	0.0482981	intronic	RABEPK	.	.	.
28	rs2998190	9	127966535	C	T	0.4543	1.407e-08	-5.672	0.001971	2.656e-05	0.01653	0.0215	0.0482925	intronic	RABEPK	.	.	.
28	rs864882	9	127968109	C	T	0.3091	2.872e-09	-5.939	0.0002897	2.345e-07	0.03516	0.01042	0.0728299	intronic	RABEPK	.	.	.
28	rs594639	9	127968365	G	A	0.4543	1.507e-08	5.661	0.002479	2.603e-05	0.01208	0.01419	0.0503466	intronic	RABEPK	.	.	.
28	rs405631	9	127968496	C	A	0.3201	3.055e-09	5.929	0.00276	7.709e-08	0.04278	0.02433	0.0555329	intronic	RABEPK	.	.	.
28	rs420423	9	127969785	G	A	0.4563	3.291e-08	-5.525	0.004188	2.443e-05	0.01675	0.01999	0.0472204	intronic	RABEPK	.	.	.
28	rs472533	9	127970114	C	A	0.4533	1.366e-08	-5.678	0.0024	2.71e-05	0.01192	0.01281	0.0502771	intronic	RABEPK	.	.	.
28	rs500438	9	127970845	C	T	0.3171	3.945e-09	-5.886	0.001137	1.94e-07	0.04775	0.01143	0.0806065	intronic	RABEPK	.	.	.
28	rs641513	9	127972775	G	A	0.4543	1.241e-08	5.694	0.001968	2.605e-05	0.01241	0.01272	0.0520152	intronic	RABEPK	.	.	.
28	rs12380310	9	127973473	G	A	0.3091	6.466e-11	-6.533	0.0002381	3.342e-07	0.01925	0.006668	0.0721739	intronic	RABEPK	.	.	.	y
29	rs7044246	9	134866271	C	T	0.3022	3.609e-08	-5.509	0.003161	0.9023	0.2243	1.715e-06	0.000214941	intronic	MED27	.	.	.	y
30	rs7476	11	46342834	C	A	0.325	1.693e-08	-5.641	1.489e-05	0.0001314	0.2854	0.06533	0.0028132	UTR3	CREB3L1	ENST00000621158.5_3:c.*538C>A	.	.	y
31	rs12805343	11	57524724	C	A	0.4284	8.516e-09	-5.758	2.183e-05	0.2284	1.232e-05	0.08349	0.00755284	intronic	CTNND1;ENSG00000254732;ENSG00000288534	.	.	.
31	rs11570176	11	57529429	G	A	0.4284	8.358e-09	5.761	1.654e-05	0.2481	1.343e-05	0.07758	0.00769821	UTR5	CTNND1	ENST00000358694.10_7:c.-29522G>A;ENST00000361332.8_2:c.-29522G>A;ENST00000361391.10_1:c.-29522G>A;ENST00000361796.9_4:c.-29522G>A;ENST00000415361.6_3:c.-33656G>A;ENST00000426142.6_1:c.-33656G>A;ENST00000428599.6_7:c.-29522G>A;ENST00000525902.5_1:c.-39789G>A;ENST00000526357.5_1:c.-29684G>A;ENST00000526772.5_1:c.-39789G>A;ENST00000527467.5_1:c.-39789G>A;ENST00000528232.5_1:c.-33656G>A;ENST000005286…	.	.
31	rs7120868	11	57530528	G	T	0.4284	8.648e-09	5.755	1.779e-05	0.2482	1.309e-05	0.07827	0.0077117	intronic	CTNND1;ENSG00000254732;ENSG00000288534	.	.	.
31	rs17455422	11	57534799	C	T	0.4294	7.817e-09	-5.772	1.455e-05	0.2463	1.166e-05	0.07463	0.00617177	intronic	CTNND1;ENSG00000254732;ENSG00000288534	.	.	.
31	rs11229119	11	57535966	C	T	0.4334	6.444e-10	-6.179	8.615e-06	0.2287	1.337e-05	0.01906	0.00723669	intronic	CTNND1;ENSG00000254732;ENSG00000288534	.	.	.	y
31	rs12270209	11	57537787	G	A	0.4334	1.779e-08	-5.632	1.269e-05	0.2285	1.429e-05	0.07232	0.00871706	intronic	CTNND1;ENSG00000254732;ENSG00000288534	.	.	.
31	rs17455626	11	57544484	C	T	0.4284	7.596e-09	5.777	1.308e-05	0.2521	1.112e-05	0.07599	0.00617604	intronic	CTNND1;ENSG00000254732;ENSG00000288534	.	.	.
31	rs4611222	11	57552265	G	A	0.4324	1.124e-08	-5.711	1.391e-05	0.2443	1.623e-05	0.07279	0.00860161	intronic	CTNND1;ENSG00000254732;ENSG00000288534	.	.	.
31	rs11570181	11	57555770	C	T	0.4294	1.136e-08	5.709	1.743e-05	0.2448	1.234e-05	0.07637	0.00616993	intronic	CTNND1;ENSG00000254732;ENSG00000288534	.	.	.
31	rs12274865	11	57557668	C	T	0.4324	1.337e-08	-5.681	1.429e-05	0.2293	1.624e-05	0.074	0.00860161	intronic	CTNND1;ENSG00000254732;ENSG00000288534	.	.	.
31	rs10896644	11	57563991	C	T	0.4284	1.416e-08	-5.671	2.699e-05	0.2436	1.078e-05	0.08184	0.00638513	exonic	CTNND1	.	synonymous SNV	CTNND1:ENST00000532245.5_1:exon3:c.C180T:p.D60D,CTNND1:ENST00000415361.6_3:exon4:c.C180T:p.D60D,CTNND1:ENST00000426142.6_1:exon4:c.C180T:p.D60D,CTNND1:ENST00000528232.5_1:exon4:c.C180T:p.D60D,CTNND1:ENST00000529986.5_1:exon4:c.C180T:p.D60D,CTNND1:ENST00000530094.5_1:exon4:c.C180T:p.D60D,CTNND1:ENST00000532463.5_1:exon4:c.C180T:p.D60D,CTNND1:ENST00000532787.5_1:exon4:c.C180T:p.D60D,CTNND1:ENST0000…
31	rs653889	11	57570430	G	A	0.4314	1.029e-08	5.726	2.612e-05	0.2313	1.553e-05	0.07809	0.00628825	intronic	CTNND1;ENSG00000288534	.	.	.
31	rs665058	11	57579166	C	T	0.4334	3.627e-09	5.9	1.79e-05	0.228	1.94e-05	0.07641	0.0101316	intronic	CTNND1;ENSG00000288534	.	.	.
31	rs658936	11	57580560	G	T	0.4344	1.245e-08	-5.693	2.494e-05	0.2292	1.63e-05	0.07582	0.00866044	intronic	CTNND1;ENSG00000288534	.	.	.
31	rs623541	11	57581613	C	A	0.4344	3.533e-09	5.905	2.661e-05	0.2288	1.64e-05	0.0755	0.00853277	intronic	CTNND1;ENSG00000288534	.	.	.
31	rs10896649	11	57587795	G	A	0.4334	2.984e-08	5.542	2.556e-05	0.232	1.931e-05	0.07796	0.00853238	downstream	CTNND1	dist=777	.	.
31	rs627145	11	57602469	G	A	0.4334	3.49e-08	5.515	0.0006298	0.2303	1.99e-05	0.07582	0.00853316	intergenic	CTNND1;ENSG00000290827	dist=15451;dist=26951	.	.
31	rs645145	11	57609787	G	T	0.4284	1.161e-08	-5.705	0.000973	0.2456	1.425e-05	0.07591	0.00612266	intergenic	CTNND1;ENSG00000290827	dist=22769;dist=19633	.	.
31	rs644219	11	57610017	C	T	0.4284	1.1e-08	-5.715	0.0009	0.2463	1.412e-05	0.07535	0.00612266	intergenic	CTNND1;ENSG00000290827	dist=22999;dist=19403	.	.
31	rs631350	11	57690940	C	T	0.4364	2.732e-08	-5.558	2.002e-05	0.7261	0.000415	0.1527	0.008046	intergenic	ENSG00000290827;OR9Q1	dist=49880;dist=100413	.	.	y
31	rs672537	11	57693292	C	T	0.4374	3.734e-08	-5.503	1.948e-05	0.1313	0.0005286	0.1588	0.008192	intergenic	ENSG00000290827;OR9Q1	dist=52232;dist=98061	.	.
32	rs4444109	11	112854309	G	T	0.2962	4.233e-08	5.481	2.942e-05	1.177e-05	0.0573	0.03443	0.129707	intronic	NCAM1	.	.	.	y
32	rs4466874	11	112861434	C	T	0.4344	6.33e-13	-7.193	4.223e-06	4.309e-07	0.001003	0.007351	0.0142797	intronic	NCAM1	.	.	.
32	rs4479020	11	112861443	G	A	0.4344	6.05e-13	7.199	4.004e-06	3.824e-07	0.001038	0.00752	0.0142797	intronic	NCAM1	.	.	.
32	rs7115165	11	112862587	C	T	0.4344	1.826e-12	-7.047	4.843e-06	4.204e-07	0.0009593	0.00728	0.0142797	intronic	NCAM1	.	.	.
32	rs7108081	11	112865115	G	A	0.4344	2.891e-12	-6.983	5.804e-06	3.96e-07	0.0007895	0.007206	0.0142771	intronic	NCAM1	.	.	.
32	rs4381397	11	112866269	C	T	0.4344	3.001e-12	-6.978	5.101e-06	4.245e-07	0.0008461	0.007343	0.0142801	intronic	NCAM1	.	.	.
32	rs4144892	11	112866456	C	T	0.4344	2.61e-12	6.997	5.867e-06	3.745e-07	0.0008461	0.006629	0.0133021	intronic	NCAM1	.	.	.
32	rs1940702	11	112867061	G	A	0.4354	2.948e-12	-6.98	5.354e-06	4.123e-07	0.0008365	0.007174	0.0142781	intronic	NCAM1	.	.	.
32	rs10891487	11	112869054	G	A	0.4364	5.3e-13	7.217	4.756e-06	4.013e-07	0.0007719	0.007542	0.0142764	intronic	NCAM1	.	.	.
32	rs1940701	11	112869404	C	T	0.4344	3.93e-13	-7.258	3.268e-06	2.24e-07	0.001001	0.00767	0.0142781	intronic	NCAM1	.	.	.
32	rs723599	11	112872305	G	A	0.4344	5.734e-13	-7.207	5.888e-06	3.958e-07	0.0007939	0.007005	0.0143288	intronic	NCAM1	.	.	.
32	rs7127930	11	112874645	C	A	0.4344	3.343e-13	7.28	3.766e-06	4.275e-07	0.000838	0.00675	0.0143285	intronic	NCAM1	.	.	.
32	rs1940697	11	112876886	G	A	0.4344	1.488e-12	7.076	6.158e-06	4.28e-07	0.0007707	0.006436	0.0143285	intronic	NCAM1	.	.	.
32	rs9919670	11	112877304	G	A	0.4354	5.461e-13	7.213	5.213e-06	5.407e-07	0.0009909	0.006453	0.0143219	intronic	NCAM1	.	.	.
32	rs9919557	11	112877408	C	T	0.4344	2.149e-12	-7.024	4.696e-06	4.437e-07	0.0007041	0.006899	0.0143285	intronic	NCAM1	.	.	.
32	rs7118907	11	112878254	C	A	0.4344	2.61e-13	7.313	3.513e-06	3.834e-07	0.0008585	0.006779	0.0143285	intronic	NCAM1	.	.	.	y
32	rs7113596	11	112883761	C	A	0.4344	1.243e-12	7.1	5.652e-06	4.551e-07	0.0007933	0.006707	0.0143285	intronic	NCAM1	.	.	.
32	rs999851	11	112889846	G	A	0.4344	6.191e-09	-5.812	0.008782	4.593e-07	0.0008445	0.00686	0.0143295	intronic	NCAM1	.	.	.
32	rs1940733	11	112892274	G	A	0.4344	9.605e-11	6.473	0.008537	4.565e-07	0.0008787	0.006239	0.0143173	intronic	NCAM1	.	.	.
32	rs9919620	11	112892570	G	A	0.4344	9.641e-11	6.472	0.008534	4.745e-07	0.0008741	0.006154	0.0143169	intronic	NCAM1	.	.	.
32	rs7926312	11	112893856	G	A	0.4354	8.948e-11	-6.484	0.008443	4.703e-07	0.0008183	0.006109	0.0143153	intronic	NCAM1	.	.	.
33	rs12804573	11	113241726	G	A	0.4712	2.863e-08	-5.55	0.0006917	0.9994	0.03134	0.02869	1.32898e-06	intronic	TTC12	.	.	.
33	rs1078	11	113241877	C	T	0.4702	4.227e-08	-5.481	0.0008827	0.9993	0.03212	0.03534	1.3334e-06	intronic	TTC12	.	.	.
33	rs2186799	11	113242533	G	T	0.4682	3.706e-08	-5.504	0.0008603	0.9752	0.02932	0.03545	1.3398e-06	intronic	TTC12	.	.	.
33	rs10891544	11	113256152	C	A	0.4781	1.947e-08	-5.617	0.004028	0.9409	0.0382	0.01608	2.49638e-06	intergenic	TTC12;ANKK1	dist=1886;dist=2349	.	.
33	rs11214594	11	113259332	G	A	0.4712	2.526e-09	-5.96	0.001675	0.0002751	0.05503	0.004839	1.15157e-06	intronic	ANKK1	.	.	.
33	rs11214595	11	113259658	G	T	0.4712	2.227e-09	-5.98	0.001752	0.0002725	0.05451	0.005413	6.96803e-07	intronic	ANKK1	.	.	.
33	rs17600713	11	113259947	G	A	0.4702	2.231e-09	-5.98	0.00162	0.00027	0.0527	0.006037	6.99665e-07	intronic	ANKK1	.	.	.
33	rs34601878	11	113260898	G	A	0.4712	5.426e-10	-6.206	0.001628	0.0002046	0.03925	0.005388	6.93346e-07	intronic	ANKK1	.	.	.
33	rs12360992	11	113262900	C	A	0.4682	5.742e-10	6.197	0.001581	0.0001799	0.03997	0.006436	6.77174e-07	intronic	ANKK1	.	.	.
33	rs35023999	11	113266411	C	A	0.496	6.811e-13	7.183	3.191e-06	0.0004972	0.00845	0.01786	4.03962e-07	intronic	ANKK1	.	.	.
33	rs10891547	11	113267218	C	A	0.499	3.808e-12	-6.944	4.899e-06	0.0003761	0.01108	0.01706	3.8249e-07	intronic	ANKK1	.	.	.
33	rs10891548	11	113267259	G	A	0.499	4.033e-12	-6.936	5.045e-06	0.0003783	0.01109	0.01768	3.8249e-07	intronic	ANKK1	.	.	.
33	rs11604671	11	113268059	G	A	0.499	3.791e-12	-6.945	7.135e-06	0.0004168	0.00984	0.01447	3.7436e-07	exonic	ANKK1	.	nonsynonymous SNV	ANKK1:ENST00000303941.4_3:exon6:c.G952A:p.G318R
33	rs2734849	11	113270160	G	A	0.496	5.974e-12	6.88	7.035e-06	0.0003804	0.007148	0.03549	3.596e-07	exonic	ANKK1	.	synonymous SNV	ANKK1:ENST00000303941.4_3:exon8:c.A1469A:p.H490H
33	rs11214599	11	113271360	C	T	0.1461	1.727e-09	6.022	3.937e-06	9.828e-06	0.02415	0.04345	0.130449	downstream	ANKK1	dist=222	.	.
33	rs11214601	11	113272762	C	T	0.1461	2.738e-09	5.947	3.878e-06	9.795e-06	0.02452	0.04504	0.12874	intergenic	ANKK1;ENSG00000256757	dist=1624;dist=3281	.	.
33	rs2511520	11	113274771	C	T	0.1461	2.292e-09	5.976	3.268e-06	9.795e-06	0.02292	0.04354	0.1303	intergenic	ANKK1;ENSG00000256757	dist=3633;dist=1272	.	.
33	rs2242593	11	113276265	C	T	0.1471	2.526e-09	-5.96	3.539e-06	1.037e-05	0.02284	0.04551	0.128739	ncRNA_intronic	ENSG00000256757	.	.	.
33	rs10891549	11	113278447	C	T	0.4543	3.576e-13	7.271	2.315e-06	5.024e-05	0.03269	0.008086	7.0749e-07	ncRNA_intronic	ENSG00000256757	.	.	.
33	rs1554929	11	113278764	C	T	0.4573	6.086e-13	-7.199	2.902e-06	7.398e-05	0.03905	0.006822	7.86013e-07	ncRNA_intronic	ENSG00000256757	.	.	.
33	rs2242591	11	113279921	C	T	0.1481	2.03e-09	5.995	2.764e-06	1.033e-05	0.02124	0.04321	0.12999	ncRNA_intronic	ENSG00000256757	.	.	.
33	rs11214603	11	113279922	G	A	0.4563	3.433e-13	-7.276	2.155e-06	4.926e-05	0.0337	0.007598	7.59259e-07	ncRNA_intronic	ENSG00000256757	.	.	.
33	rs6278	11	113280724	C	A	0.1481	2.662e-09	5.951	2.694e-06	1.049e-05	0.02093	0.03264	0.12999	ncRNA_intronic	ENSG00000256757	.	.	.
33	rs1124491	11	113282090	G	A	0.1481	2.43e-09	5.966	2.403e-06	1.146e-05	0.02022	0.03182	0.127225	ncRNA_intronic	ENSG00000256757	.	.	.
33	rs1079595	11	113282669	C	A	0.1491	2.37e-09	-5.97	2.54e-06	9.932e-06	0.01974	0.0326	0.12999	ncRNA_intronic	ENSG00000256757	.	.	.
33	rs1079594	11	113282812	C	A	0.1491	1.963e-09	-6.001	2.711e-06	9.924e-06	0.01962	0.02593	0.12999	ncRNA_exonic	ENSG00000256757	.	.	.
33	rs6277	11	113283459	G	A	0.4563	6.415e-13	-7.191	1.088e-06	4.558e-05	0.06524	0.007326	7.7931e-07	exonic	DRD2	.	synonymous SNV	DRD2:ENST00000346454.7_7:exon6:c.C870C:p.P290P,DRD2:ENST00000542968.5_8:exon6:c.C957C:p.P319P,DRD2:ENST00000544518.5_4:exon6:c.C954C:p.P318P,DRD2:ENST00000362072.8_10:exon7:c.C957C:p.P319P,DRD2:ENST00000538967.5_4:exon7:c.C963C:p.P321P
33	rs1076560	11	113283688	C	A	0.1501	8.13e-10	6.142	1.357e-06	6.166e-06	0.01973	0.03078	0.134025	intronic	DRD2	.	.	.
33	rs2283265	11	113285536	C	A	0.1481	1.413e-09	6.054	8.407e-07	3.93e-06	0.02485	0.03921	0.139719	intronic	DRD2	.	.	.
33	rs12363125	11	113285916	C	T	0.3877	1.657e-15	-7.965	1.904e-07	3.003e-05	0.01146	0.004523	1.86496e-07	intronic	DRD2	.	.	.	y
33	rs2734839	11	113286490	C	T	0.3867	2.424e-15	-7.917	3.175e-07	3.9e-05	0.01034	0.004776	1.69664e-07	intronic	DRD2	.	.	.
33	rs2734838	11	113286501	G	A	0.3877	1.721e-15	7.96	1.927e-07	2.789e-05	0.01266	0.004574	1.69422e-07	intronic	DRD2	.	.	.
33	rs2734837	11	113286829	C	T	0.3867	2.339e-15	-7.922	3.064e-07	3.888e-05	0.01046	0.005314	1.69652e-07	intronic	DRD2	.	.	.
33	rs1107162	11	113289037	G	A	0.3877	2.339e-15	-7.922	2.348e-07	2.82e-05	0.01376	0.005049	1.69602e-07	intronic	DRD2	.	.	.
33	rs2075654	11	113289066	C	T	0.1461	6.399e-10	6.18	6.862e-07	3.311e-06	0.02675	0.04252	0.119892	intronic	DRD2	.	.	.
33	rs1079727	11	113289182	C	T	0.1471	9.478e-10	-6.118	6.935e-07	3.497e-06	0.0254	0.03553	0.119744	intronic	DRD2	.	.	.
33	rs2734836	11	113291239	C	T	0.1471	9.109e-10	6.124	6.957e-07	3.552e-06	0.02331	0.0367	0.120765	intronic	DRD2	.	.	.
33	rs2734835	11	113291343	G	T	0.3867	2.699e-15	7.904	4.099e-07	3.985e-05	0.01267	0.004631	1.33829e-07	intronic	DRD2	.	.	.
33	rs1800498	11	113291588	G	A	0.3867	2.348e-15	-7.921	4.245e-07	3.058e-05	0.01354	0.005134	1.01018e-07	intronic	DRD2	.	.	.
33	rs2734833	11	113292920	G	A	0.3867	3.132e-15	-7.886	5.375e-07	3.1e-05	0.01216	0.003758	2.30861e-07	intronic	DRD2	.	.	.
33	rs2734832	11	113293501	G	A	0.3867	1.71e-15	7.961	3.733e-07	3.465e-05	0.01187	0.003796	1.02419e-07	intronic	DRD2	.	.	.
33	rs2734831	11	113293596	G	T	0.3867	1.824e-15	7.953	3.804e-07	3.466e-05	0.01241	0.003779	1.02407e-07	intronic	DRD2	.	.	.
33	rs1962262	11	113294179	G	A	0.1481	4.758e-10	6.227	5.46e-07	3.817e-06	0.02099	0.03812	0.121723	intronic	DRD2	.	.	.
33	rs11608185	11	113294976	C	T	0.3877	2.003e-15	7.941	4.712e-07	2.962e-05	0.01298	0.004506	9.84283e-08	intronic	DRD2	.	.	.
33	rs1076563	11	113295909	C	A	0.3877	4.251e-15	7.847	4.275e-07	3.468e-05	0.01282	0.006769	1.31883e-07	intronic	DRD2	.	.	.
33	rs1116313	11	113296107	G	A	0.3877	2.931e-15	7.894	4.699e-07	3.407e-05	0.01242	0.004721	1.30608e-07	intronic	DRD2	.	.	.
33	rs1079598	11	113296274	G	A	0.1481	5.739e-10	-6.197	6.106e-07	3.844e-06	0.01888	0.04197	0.137456	intronic	DRD2	.	.	.
33	rs1079597	11	113296286	C	T	0.1491	5.219e-10	6.212	5.304e-07	4.096e-06	0.0209	0.03534	0.1383	intronic	DRD2	.	.	.
33	rs1079596	11	113296619	C	T	0.1481	4.867e-10	6.223	5.907e-07	3.155e-06	0.0227	0.04297	0.109613	intronic	DRD2	.	.	.
33	rs1125394	11	113297185	C	T	0.1481	4.333e-10	-6.242	7.185e-07	2.942e-06	0.0219	0.03215	0.125623	intronic	DRD2	.	.	.
33	rs1125393	11	113297349	C	T	0.1471	4.683e-10	6.229	7.052e-07	2.983e-06	0.02158	0.04131	0.109521	intronic	DRD2	.	.	.
33	rs2471857	11	113298339	C	T	0.1481	3.997e-10	6.254	1.043e-06	2.92e-06	0.02006	0.03182	0.10968	intronic	DRD2	.	.	.
33	rs12798900	11	113298996	G	T	0.3946	1.768e-14	-7.666	2.864e-07	5.281e-05	0.02075	0.002446	8.4155e-07	intronic	DRD2	.	.	.
33	rs7131627	11	113299829	G	A	0.3946	1.556e-14	-7.683	4.18e-07	7.058e-05	0.02219	0.002536	8.61271e-07	intronic	DRD2	.	.	.
33	rs7131440	11	113299910	C	T	0.3946	1.431e-14	-7.694	4.27e-07	7.071e-05	0.02199	0.002314	8.6149e-07	intronic	DRD2	.	.	.
33	rs7131465	11	113300022	C	A	0.3946	1.539e-14	7.684	3.905e-07	6.922e-05	0.02309	0.002509	8.63615e-07	intronic	DRD2	.	.	.
33	rs7131681	11	113300052	C	T	0.3946	1.421e-14	-7.694	4.028e-07	7.278e-05	0.02189	0.002342	8.61549e-07	intronic	DRD2	.	.	.
33	rs11214605	11	113300601	C	T	0.3946	1.282e-14	-7.708	3.461e-07	5.752e-05	0.02454	0.002371	8.61331e-07	intronic	DRD2	.	.	.
33	rs2471851	11	113301069	C	A	0.1481	1.111e-09	-6.093	6.179e-07	3.684e-06	0.01803	0.03668	0.124105	intronic	DRD2	.	.	.
33	rs12800853	11	113302514	C	T	0.3946	4.52e-15	-7.84	1.73e-07	8.588e-05	0.01688	0.002216	7.21373e-07	intronic	DRD2	.	.	.
33	rs7103679	11	113303674	C	T	0.1451	6.33e-10	6.182	1.495e-06	3.513e-06	0.01682	0.04236	0.112306	intronic	DRD2	.	.	.
33	rs4938017	11	113303929	C	T	0.3857	4.475e-15	7.841	1.044e-06	5.812e-05	0.0143	0.005162	1.18187e-07	intronic	DRD2	.	.	.
33	rs7122246	11	113304457	G	A	0.3867	8.837e-15	-7.755	1.344e-06	0.0001262	0.01424	0.004635	1.23883e-07	intronic	DRD2	.	.	.
33	rs7350522	11	113305203	G	T	0.1441	3.014e-10	6.298	7.496e-07	2.97e-06	0.01856	0.0409	0.113703	intronic	DRD2	.	.	.	y
33	rs12364051	11	113305314	G	A	0.3847	4.72e-14	7.539	1.004e-06	0.0001032	0.01478	0.004301	1.27295e-07	intronic	DRD2	.	.	.
33	rs4587762	11	113306893	G	A	0.3857	2.914e-14	-7.602	9.864e-07	0.0001012	0.02423	0.006738	7.75622e-08	intronic	DRD2	.	.	.
33	rs4245150	11	113364647	G	T	0.3618	1.411e-12	7.083	1.83e-13	0.003769	0.1367	0.0001207	0.00417475	intergenic	DRD2;TMPRSS5	dist=18527;dist=193622	.	.
33	rs17602038	11	113364691	C	T	0.3618	1.014e-12	7.129	1.059e-13	0.003434	0.1353	4.744e-05	0.00420233	intergenic	DRD2;TMPRSS5	dist=18571;dist=193578	.	.
33	rs4938021	11	113364803	C	T	0.3618	5.557e-13	7.211	1.096e-13	0.003586	0.1381	4.732e-05	0.00371706	intergenic	DRD2;TMPRSS5	dist=18683;dist=193466	.	.
33	rs4936275	11	113365084	C	T	0.3618	5.472e-13	7.213	1.081e-13	0.003611	0.1375	4.663e-05	0.00371826	intergenic	DRD2;TMPRSS5	dist=18964;dist=193185	.	.
33	rs61902811	11	113370758	G	A	0.3588	8.106e-13	-7.159	1.202e-12	0.005943	0.1795	3.066e-05	0.00531569	intergenic	DRD2;TMPRSS5	dist=24638;dist=187511	.	.
33	rs7934649	11	113372671	C	T	0.3588	8.931e-13	7.146	1.189e-12	0.006873	0.1797	2.877e-05	0.00531312	intergenic	DRD2;TMPRSS5	dist=26551;dist=185598	.	.
33	rs6589379	11	113374567	G	T	0.3588	7.484e-13	7.17	1.008e-12	0.006844	0.1733	2.689e-05	0.00532476	intergenic	DRD2;TMPRSS5	dist=28447;dist=183702	.	.
33	rs4938023	11	113374847	G	T	0.3588	1.944e-12	-7.038	1.272e-12	0.007073	0.1709	2.997e-05	0.00532427	intergenic	DRD2;TMPRSS5	dist=28727;dist=183422	.	.
33	rs7111031	11	113377488	C	A	0.3588	9.987e-13	7.131	1.683e-12	0.007146	0.1654	3.509e-05	0.00501256	intergenic	DRD2;TMPRSS5	dist=31368;dist=180781	.	.
33	rs6589381	11	113378952	C	A	0.4145	1.324e-08	-5.683	1.643e-07	0.01139	0.4263	0.0004722	0.0172096	intergenic	DRD2;TMPRSS5	dist=32832;dist=179317	.	.
33	rs7949802	11	113381832	C	T	0.4155	2.056e-08	-5.607	1.28e-07	0.01017	0.432	0.0003319	0.0174329	intergenic	DRD2;TMPRSS5	dist=35712;dist=176437	.	.
33	rs4479021	11	113383394	G	A	0.4155	7.009e-09	-5.791	1.34e-07	0.01154	0.4171	0.0004213	0.0176567	intergenic	DRD2;TMPRSS5	dist=37274;dist=174875	.	.	y
33	rs7107293	11	113384111	G	A	0.4155	7.087e-09	-5.789	1.212e-07	0.01182	0.4246	0.0004693	0.0161763	intergenic	DRD2;TMPRSS5	dist=37991;dist=174158	.	.
33	rs4534613	11	113386043	C	A	0.4155	1.279e-08	5.689	1.663e-07	0.01129	0.409	0.0005213	0.0161317	intergenic	DRD2;TMPRSS5	dist=39923;dist=172226	.	.
33	rs35738585	11	113386347	G	T	0.4155	1.482e-08	5.664	1.818e-07	0.01197	0.4158	0.0005467	0.0161399	intergenic	DRD2;TMPRSS5	dist=40227;dist=171922	.	.
33	rs34216353	11	113386391	C	T	0.4155	1.475e-08	-5.664	1.82e-07	0.01197	0.4157	0.0005427	0.016131	intergenic	DRD2;TMPRSS5	dist=40271;dist=171878	.	.
33	rs4245154	11	113388674	G	A	0.4155	1.256e-08	5.692	2.011e-07	0.006916	0.3254	0.0007335	0.0161083	intergenic	DRD2;TMPRSS5	dist=42554;dist=169595	.	.
33	rs2514218	11	113392994	C	T	0.3519	1.504e-13	-7.387	7.588e-12	0.001636	0.08041	0.0001422	0.00252744	intergenic	DRD2;TMPRSS5	dist=46874;dist=165275	.	.
33	rs12420205	11	113394035	C	T	0.3091	2.947e-14	7.601	2.405e-10	0.004208	0.006428	0.0002525	0.00338673	intergenic	DRD2;TMPRSS5	dist=47915;dist=164234	.	.	y
33	rs12222458	11	113417603	C	T	0.4016	2.625e-08	5.565	0.0001447	0.03435	0.0007349	0.008969	0.0240597	intergenic	DRD2;TMPRSS5	dist=71483;dist=140666	.	.	y
33	rs10736469	11	113418222	G	A	0.3767	2.321e-10	6.338	2.057e-06	0.0126	0.0003411	0.002069	0.063536	intergenic	DRD2;TMPRSS5	dist=72102;dist=140047	.	.
33	rs10736470	11	113418371	G	A	0.338	6.229e-12	6.874	1.398e-08	0.01252	0.001454	0.0004458	0.015361	intergenic	DRD2;TMPRSS5	dist=72251;dist=139898	.	.
33	rs4936277	11	113431960	G	A	0.4225	7.33e-15	7.779	7.672e-12	0.005734	0.05144	0.0004639	1.75327e-05	intergenic	DRD2;TMPRSS5	dist=85840;dist=126309	.	.
33	rs7125588	11	113436072	G	A	0.4085	2.643e-14	7.615	1.045e-13	0.002683	0.0534	0.0008884	6.03601e-06	intergenic	DRD2;TMPRSS5	dist=89952;dist=122197	.	.
33	rs4531502	11	113437033	G	A	0.4334	1.176e-08	-5.703	0.002854	0.2127	0.0006905	0.003597	0.00501199	intergenic	DRD2;TMPRSS5	dist=90913;dist=121236	.	.	y
33	rs7933981	11	113438068	G	A	0.4085	3.938e-15	-7.857	8.911e-14	0.001314	0.04204	0.0009882	6.90431e-06	intergenic	DRD2;TMPRSS5	dist=91948;dist=120201	.	.
33	rs61687445	11	113438092	C	A	0.4095	3.123e-15	-7.886	7.742e-14	0.001336	0.03818	0.00102	6.02102e-06	intergenic	DRD2;TMPRSS5	dist=91972;dist=120177	.	.	y
33	rs7123697	11	113440331	G	T	0.4344	1.285e-08	-5.688	0.003514	0.2261	0.0008708	0.001709	0.00578735	intergenic	DRD2;TMPRSS5	dist=94211;dist=117938	.	.
33	rs7101666	11	113442336	C	T	0.499	2.164e-12	-7.024	8.897e-09	0.02397	0.0323	0.001194	4.12401e-05	intergenic	DRD2;TMPRSS5	dist=96216;dist=115933	.	.
33	rs7102458	11	113442865	G	A	0.496	1.055e-11	-6.799	3.335e-08	0.02142	0.03328	0.001298	4.13419e-05	intergenic	DRD2;TMPRSS5	dist=96745;dist=115404	.	.
33	rs6589386	11	113443753	C	T	0.4085	6.639e-15	-7.791	5.882e-14	0.001428	0.04526	0.000774	6.05397e-06	intergenic	DRD2;TMPRSS5	dist=97633;dist=114516	.	.
33	rs7936719	11	113445494	C	T	0.498	3.3e-12	-6.964	7.427e-09	0.01913	0.04099	0.0009998	3.5447e-05	intergenic	DRD2;TMPRSS5	dist=99374;dist=112775	.	.
33	rs7928017	11	113448762	C	A	0.4085	2.508e-09	-5.961	7.09e-05	0.997	0.04306	0.0007043	6.3728e-06	intergenic	DRD2;TMPRSS5	dist=102642;dist=109507	.	.
33	rs73004038	11	113475283	G	A	0.09841	1.68e-08	5.642	2.008e-06	0.004051	0.0273	0.253	0.00400562	intergenic	DRD2;TMPRSS5	dist=129163;dist=82986	.	.	y
33	rs17603387	11	113477587	C	T	0.09841	1.987e-08	-5.613	1.691e-06	0.004234	0.02898	0.2401	0.00400544	intergenic	DRD2;TMPRSS5	dist=131467;dist=80682	.	.
33	rs55751957	11	113485326	G	T	0.09841	2.226e-08	5.593	1.653e-06	0.004337	0.03207	0.2398	0.0040035	intergenic	DRD2;TMPRSS5	dist=139206;dist=72943	.	.
33	rs11601692	11	113500821	C	T	0.1004	4.689e-08	5.463	2.462e-06	0.003301	0.02906	0.2374	0.00448621	intergenic	DRD2;TMPRSS5	dist=154701;dist=57448	.	.
33	rs17532157	11	113516770	G	T	0.1004	3.839e-08	5.498	1.525e-05	0.002251	0.02145	0.4124	0.00182873	intergenic	DRD2;TMPRSS5	dist=170650;dist=41499	.	.
33	rs61904986	11	113517002	C	T	0.1004	3.98e-08	-5.492	1.647e-05	0.002308	0.02241	0.3996	0.00179432	intergenic	DRD2;TMPRSS5	dist=170882;dist=41267	.	.
33	rs17532254	11	113518935	G	A	0.1014	3.727e-08	-5.503	1.188e-05	0.002181	0.02679	0.4015	0.00166694	intergenic	DRD2;TMPRSS5	dist=172815;dist=39334	.	.
33	rs61904996	11	113524462	G	A	0.1004	3.82e-08	-5.499	1.037e-05	0.002311	0.03268	0.3424	0.00175756	intergenic	DRD2;TMPRSS5	dist=178342;dist=33807	.	.
33	rs61904997	11	113524465	C	T	0.1004	4.007e-08	5.491	1.119e-05	0.002311	0.03268	0.3447	0.00175756	intergenic	DRD2;TMPRSS5	dist=178345;dist=33804	.	.
33	rs11602079	11	113527535	C	T	0.1014	2.518e-08	-5.572	3.186e-05	0.002174	0.04423	0.7258	0.00175707	intergenic	DRD2;TMPRSS5	dist=181415;dist=30734	.	.
34	rs663175	11	121533827	G	A	0.4423	3.846e-09	5.891	1.268e-07	0.05955	0.005403	0.08135	0.00064152	intergenic	SORL1;ENSG00000286044	dist=29355;dist=11142	.	.
34	rs647905	11	121534938	C	T	0.4423	1.226e-09	6.077	1.845e-07	0.05052	0.00606	0.08301	0.000486004	intergenic	SORL1;ENSG00000286044	dist=30466;dist=10031	.	.	y
34	rs1783835	11	121542923	G	A	0.4473	1.228e-08	-5.696	2.24e-09	0.1173	0.007198	0.2215	0.00163294	intergenic	SORL1;ENSG00000286044	dist=38451;dist=2046	.	.
35	rs11432080	13	96970919	GT	G	0.3489	1.653e-08	-5.645	2.794e-05	0.2008	0.2309	0.01324	0.000385132	intronic	HS6ST3	.	.	.	y
36	rs4906335	14	104021141	C	A	0.2664	3.47e-08	5.516	0.01362	0.1367	0.2015	0.0001007	1.3993e-05	ncRNA_intronic	ENSG00000258851	.	.	.
36	rs35498576	14	104025893	C	T	0.2664	4.933e-08	-5.454	0.007735	0.1054	0.2102	6.231e-05	1.35049e-05	ncRNA_intronic	ENSG00000258851	.	.	.
36	rs34186780	14	104027595	G	T	0.2624	4.493e-08	-5.47	0.008534	0.03652	0.2159	4.165e-05	1.34215e-05	ncRNA_intronic	ENSG00000258851	.	.	.
36	rs34896432	14	104027995	C	T	0.2624	9.129e-09	5.746	0.04879	0.03261	0.1837	6.266e-05	1.33891e-05	ncRNA_intronic	ENSG00000258851	.	.	.	y
36	rs7148456	14	104028270	C	T	0.2634	2.024e-08	-5.61	0.008531	0.03369	0.2171	5.494e-05	1.24902e-05	UTR5	BAG5	ENST00000337322.5_5:c.-769G>A	.	.
36	rs11844466	14	104066422	G	A	0.2883	4.836e-08	5.457	0.0006814	0.05442	0.2629	0.0002102	9.0918e-05	intronic	ENSG00000256500	.	.	.
36	rs12884809	14	104095320	G	A	0.3101	1.663e-09	6.028	0.004462	0.03974	0.1983	1.341e-05	7.58892e-06	intronic	ENSG00000256500	.	.	.
36	rs61637848	14	104096031	C	T	0.2982	8.957e-10	6.127	0.002304	0.0324	0.08396	6.752e-07	2.05211e-06	intronic	ENSG00000256500;KLC1	.	.	.
36	rs34000399	14	104101417	C	T	0.2972	1.667e-10	-6.389	0.001747	0.03058	0.07427	6.914e-07	3.28723e-06	intronic	ENSG00000256500;KLC1	.	.	.
36	rs35921969	14	104103288	G	A	0.2982	2.036e-10	6.359	0.001869	0.03061	0.07661	8.389e-07	3.41492e-06	intronic	ENSG00000256500;KLC1	.	.	.
36	rs4906350	14	104111794	C	T	0.2972	7.899e-11	6.503	6.371e-05	0.02783	0.08639	1.47e-06	3.20848e-06	intronic	ENSG00000256500;KLC1	.	.	.
36	rs12896171	14	104135966	G	A	0.2972	6.62e-12	-6.866	0.0001161	0.02745	0.1007	9.278e-07	3.30986e-06	intronic	ENSG00000256500;KLC1	.	.	.
36	rs4906356	14	104138701	C	T	0.2972	8.388e-12	6.832	9.477e-05	0.02731	0.09295	2.106e-06	3.53712e-06	intronic	ENSG00000256500;KLC1	.	.	.
36	rs12888993	14	104140026	C	T	0.2972	6.218e-12	6.875	0.0001049	0.02722	0.09509	1.038e-06	3.55697e-06	intronic	ENSG00000256500;KLC1	.	.	.
36	rs4900590	14	104146421	C	T	0.2972	2.827e-11	6.655	0.002284	0.02932	0.1048	5.88e-07	3.56402e-06	intronic	ENSG00000256500;KLC1	.	.	.
36	rs11540512	14	104147377	C	T	0.2972	4.65e-12	6.916	8.069e-05	0.0271	0.1022	8.69e-07	2.80021e-06	intronic	ENSG00000256500;KLC1	.	.	.
36	rs35011804	14	104151400	C	T	0.2972	2.676e-12	6.994	5.626e-05	0.02772	0.08445	7.42e-07	2.99675e-06	UTR3	KLC1	ENST00000380038.7_1:c.*45C>T;ENST00000553286.5_7:c.*45C>T	.	.
36	rs4900591	14	104154878	G	A	0.2962	2.595e-12	6.998	5.89e-05	0.02826	0.08781	5.826e-07	2.9574e-06	intronic	KLC1	.	.	.
36	rs8021229	14	104157578	C	T	0.2962	2.573e-12	6.999	5.697e-05	0.02895	0.08925	8.406e-07	2.95304e-06	intronic	KLC1	.	.	.
36	rs2273175	14	104160141	C	T	0.2972	1.387e-10	-6.417	0.001518	0.02864	0.08398	2.737e-06	2.98648e-06	UTR3	KLC1	ENST00000634686.1_1:c.*186T>C	.	.
36	rs1606	14	104161281	G	A	0.2962	7.915e-11	6.502	0.001502	0.02831	0.09249	8.257e-07	2.82247e-06	ncRNA_exonic	ENSG00000269910;ENSG00000269940	.	.	.
36	rs1799796	14	104165927	C	T	0.2952	7.229e-09	-5.786	0.001564	0.02946	0.08586	9.969e-07	2.00738e-06	intronic	KLC1;XRCC3	.	.	.
36	rs3212090	14	104168863	C	T	0.2952	7.927e-11	6.502	0.001755	0.02972	0.06209	2.493e-06	2.00789e-06	UTR3	KLC1	ENST00000348520.10_4:c.*1327C>T	.	.
36	rs59092643	14	104169988	C	CCT	0.2942	1.756e-08	-5.634	0.002929	0.1313	0.05494	0.0005558	2.06766e-06	UTR3	KLC1	ENST00000348520.10_4:c.*2452_*2454delinsC	.	.
36	rs3212076	14	104170796	C	T	0.2952	8.436e-12	-6.831	0.001696	0.02936	0.05513	9.014e-07	2.15278e-06	UTR3	KLC1	ENST00000348520.10_4:c.*3260T>C	.	.
36	rs4900592	14	104177098	G	T	0.2952	1.119e-11	6.79	0.001874	0.192	0.04356	7.66e-07	1.9644e-06	UTR3	KLC1	ENST00000348520.10_4:c.*9562G>T	.	.
36	rs3212038	14	104178186	G	A	0.2992	1.606e-11	-6.738	0.001823	0.02915	0.05544	1.007e-06	2.01925e-06	UTR5;UTR3	XRCC3;KLC1	ENST00000553264.5_4:c.-762T>C;ENST00000348520.10_4:c.*10650A>G	.	.
36	rs2295152	14	104180444	C	T	0.2982	2.42e-10	6.332	0.002059	0.04668	0.0571	1.483e-06	1.8954e-06	UTR3	KLC1	ENST00000348520.10_4:c.*12908C>T	.	.
36	rs3212024	14	104180735	G	A	0.2982	3.749e-10	6.264	0.002592	0.04594	0.07829	1.242e-06	1.84557e-06	intronic	XRCC3	.	.	.
36	rs35311561	14	104188127	G	A	0.2694	4.084e-09	5.881	5.482e-05	0.1879	0.1606	2.812e-06	0.000646934	intronic	ZFYVE21	.	.	.
36	rs2295148	14	104195610	C	T	0.4404	4.079e-08	-5.487	7.72e-06	0.1889	0.8389	2.469e-06	0.000452127	intronic	ZFYVE21	.	.	.	y
36	rs3742365	14	104198251	C	T	0.3787	7.272e-09	-5.785	2.986e-06	0.1104	0.9397	3.979e-06	6.81679e-05	intronic	ZFYVE21	.	.	.
36	rs3742366	14	104198351	C	T	0.3161	1.246e-11	-6.775	7.821e-05	0.2245	0.1239	6.365e-07	1.13904e-05	intronic	ZFYVE21	.	.	.
36	rs2295146	14	104199356	C	T	0.3628	4.243e-08	5.48	1.9e-05	0.2121	0.9318	1.07e-06	0.000182176	UTR3	ZFYVE21	ENST00000216602.10_2:c.*1C>T;ENST00000311141.7_5:c.*1C>T	.	.
36	rs8548	14	104199580	C	A	0.3111	2.339e-10	-6.337	5.431e-05	0.2062	0.08888	1.469e-06	7.25989e-05	UTR3	PPP1R13B;ZFYVE21	ENST00000202556.14_6:c.*1911T>G;ENST00000216602.10_2:c.*225A>C;ENST00000311141.7_5:c.*225A>C	.	.
36	rs4906363	14	104210239	G	A	0.3042	7.746e-11	6.505	0.0001068	0.2375	0.08148	4.113e-07	4.20301e-05	intronic	PPP1R13B	.	.	.
36	rs3818085	14	104215985	C	T	0.3877	4.819e-08	5.458	2.113e-05	0.1485	0.7289	1.491e-05	0.000109486	intronic	PPP1R13B	.	.	.
36	rs1535097	14	104216649	C	T	0.3877	4.881e-08	5.456	2.118e-05	0.1463	0.7389	1.427e-05	0.000109486	intronic	PPP1R13B	.	.	.
36	rs12886637	14	104222892	C	T	0.3042	7.58e-11	6.509	0.0001318	0.2437	0.07942	3.254e-07	4.45492e-05	intronic	PPP1R13B	.	.	.
36	rs7142769	14	104228841	C	T	0.3042	5.476e-11	6.557	0.0001008	0.2772	0.06988	2.992e-07	4.76431e-05	intronic	PPP1R13B	.	.	.
36	rs12890354	14	104235862	C	A	0.3042	8.142e-11	6.498	0.0001109	0.2702	0.07896	4.185e-07	4.42374e-05	intronic	PPP1R13B	.	.	.
36	rs12888002	14	104238647	C	T	0.3042	8.132e-11	-6.498	0.0001115	0.285	0.07012	5.607e-07	4.42059e-05	intronic	PPP1R13B	.	.	.
36	rs9888591	14	104251520	C	T	0.3042	2.222e-10	6.345	0.0001346	0.03148	0.08111	4.003e-07	4.42303e-05	intronic	PPP1R13B	.	.	.
36	rs35505672	14	104253336	C	T	0.3837	4.918e-08	-5.454	3.248e-05	0.01739	0.82	1.674e-05	0.000111807	intronic	PPP1R13B	.	.	.
36	rs4906371	14	104256932	G	A	0.3837	2.776e-10	6.311	1.283e-06	0.01774	0.8246	1.623e-05	0.000106709	intronic	PPP1R13B	.	.	.
36	rs4900595	14	104258054	G	A	0.3847	5.467e-10	-6.205	1.678e-08	0.01836	0.8242	1.717e-05	0.000103633	intronic	PPP1R13B	.	.	.
36	rs722637	14	104261723	C	A	0.3091	4.395e-13	-7.243	4.983e-08	0.0203	0.07559	7.97e-07	4.55124e-05	intronic	PPP1R13B	.	.	.
36	rs34813623	14	104263294	G	A	0.3837	2.556e-10	-6.324	8.807e-09	0.0182	0.8385	1.888e-05	9.16474e-05	intronic	PPP1R13B	.	.	.
36	rs8009147	14	104264662	G	A	0.3837	4.754e-11	-6.578	1.943e-09	0.1423	0.8393	1.207e-05	9.13777e-05	intronic	PPP1R13B	.	.	.
36	rs7147171	14	104264857	G	A	0.3837	1.056e-10	6.459	1.791e-09	0.01834	0.8393	1.15e-05	9.166e-05	intronic	PPP1R13B	.	.	.
36	rs4906372	14	104265663	C	A	0.3827	8.58e-11	-6.49	1.752e-09	0.01797	0.869	1.18e-05	9.12872e-05	intronic	PPP1R13B	.	.	.
36	rs8020234	14	104266344	G	A	0.3777	1.691e-10	6.387	6.519e-09	0.02787	0.9071	9.594e-06	7.7398e-05	intronic	PPP1R13B	.	.	.
36	rs4900597	14	104266664	C	T	0.3032	4.775e-13	7.232	8.383e-08	0.03104	0.0979	2.05e-07	3.54944e-05	intronic	PPP1R13B	.	.	.
36	rs12880368	14	104267290	C	T	0.3777	2.256e-10	6.343	7.07e-09	0.02816	0.9105	9.243e-06	7.7341e-05	intronic	PPP1R13B	.	.	.
36	rs12880233	14	104267333	G	A	0.3827	2.404e-10	-6.333	2.427e-09	0.01793	0.8843	1.176e-05	9.12473e-05	intronic	PPP1R13B	.	.	.
36	rs12880413	14	104267407	G	A	0.3827	2.346e-10	-6.337	2.317e-09	0.0179	0.8837	1.173e-05	9.1199e-05	intronic	PPP1R13B	.	.	.
36	rs11623546	14	104269098	G	A	0.3827	2.433e-10	-6.331	2.318e-09	0.01833	0.8888	1.166e-05	9.11822e-05	intronic	PPP1R13B	.	.	.
36	rs4906373	14	104269808	G	A	0.3827	2.234e-10	-6.344	2.398e-09	0.01709	0.8781	1.235e-05	9.1679e-05	intronic	PPP1R13B	.	.	.
36	rs55824307	14	104271207	C	T	0.3827	2.369e-10	6.335	2.204e-09	0.01832	0.8876	1.167e-05	9.10039e-05	intronic	PPP1R13B	.	.	.
36	rs66953418	14	104271470	G	A	0.3032	1.727e-13	7.368	1.567e-08	0.03113	0.09948	2.136e-07	3.53924e-05	intronic	PPP1R13B	.	.	.
36	rs66676135	14	104271504	G	A	0.3032	2.784e-13	7.304	4.748e-08	0.02914	0.09851	2.255e-07	3.53924e-05	intronic	PPP1R13B	.	.	.
36	rs4906376	14	104272165	C	A	0.3032	5.337e-13	-7.216	3.448e-08	0.03082	0.09589	2.008e-07	3.53452e-05	intronic	PPP1R13B	.	.	.
36	rs12879501	14	104272634	G	T	0.3827	5.474e-11	6.557	2.494e-09	0.01851	0.89	1.73e-05	8.44695e-05	intronic	PPP1R13B	.	.	.
36	rs2368560	14	104273311	C	T	0.3777	8.171e-10	6.142	6.163e-09	0.02784	0.9331	2.369e-05	7.70832e-05	intronic	PPP1R13B	.	.	.
36	rs12885509	14	104273325	C	T	0.3032	3.091e-13	-7.29	3.915e-08	0.03895	0.0951	1.922e-07	3.53924e-05	intronic	PPP1R13B	.	.	.
36	rs12886363	14	104273786	C	T	0.3777	1.988e-10	-6.362	7.733e-09	0.02291	0.9304	8.812e-06	7.71401e-05	intronic	PPP1R13B	.	.	.
36	rs12885018	14	104273812	G	A	0.3827	3.548e-10	-6.273	1.931e-09	0.01607	0.8865	1.479e-05	9.10395e-05	intronic	PPP1R13B	.	.	.
36	rs12891175	14	104274166	C	T	0.3837	3.393e-10	-6.28	2.425e-09	0.01819	0.8461	1.204e-05	9.10249e-05	intronic	PPP1R13B	.	.	.
36	rs12889993	14	104274294	G	A	0.3837	3.398e-10	-6.279	2.269e-09	0.01832	0.8536	1.193e-05	9.10039e-05	intronic	PPP1R13B	.	.	.
36	rs12880821	14	104276049	C	T	0.3787	1.795e-10	6.378	7.372e-09	0.02297	0.9107	8.598e-06	7.70708e-05	intronic	PPP1R13B	.	.	.
36	rs35085624	14	104276896	G	T	0.3042	4.961e-13	7.226	2.935e-08	0.03095	0.09363	2.16e-07	3.53981e-05	intronic	PPP1R13B	.	.	.
36	rs8013637	14	104277958	G	A	0.3777	1.281e-10	6.429	8.648e-09	0.02323	0.8777	7.913e-06	7.70158e-05	intronic	PPP1R13B	.	.	.
36	rs4906377	14	104278856	G	A	0.3042	2.728e-13	7.307	3.433e-08	0.03078	0.09409	2.229e-07	3.53712e-05	intronic	PPP1R13B	.	.	.
36	rs8005594	14	104279889	C	T	0.3847	8.798e-11	-6.486	2.945e-09	0.01796	0.814	1.204e-05	9.08636e-05	intronic	PPP1R13B	.	.	.
36	rs8011109	14	104279974	G	A	0.3837	8.062e-11	6.499	1.808e-09	0.01807	0.8436	1.218e-05	9.08636e-05	intronic	PPP1R13B	.	.	.
36	rs2887282	14	104280734	C	T	0.3837	7.598e-11	-6.508	1.952e-09	0.01796	0.8434	1.044e-05	9.0849e-05	intronic	PPP1R13B	.	.	.
36	rs4900598	14	104281541	C	T	0.3847	6.146e-11	-6.54	2.01e-09	0.02067	0.8267	9.691e-06	9.08218e-05	intronic	PPP1R13B	.	.	.
36	rs8018062	14	104281954	C	T	0.3837	5.534e-11	6.556	2.043e-09	0.01956	0.8183	9.274e-06	9.07946e-05	intronic	PPP1R13B	.	.	.
36	rs4900599	14	104283444	G	T	0.3042	2.347e-13	7.327	3.028e-08	0.02997	0.09558	2.622e-07	3.53517e-05	intronic	PPP1R13B	.	.	.
36	rs4906378	14	104283445	C	T	0.3042	2.289e-13	7.331	2.997e-08	0.02982	0.09558	2.556e-07	3.53492e-05	intronic	PPP1R13B	.	.	.
36	rs17791722	14	104286210	C	T	0.3052	2.462e-13	7.321	2.606e-08	0.03033	0.0948	2.411e-07	3.56164e-05	intronic	PPP1R13B	.	.	.
36	rs2223937	14	104286380	G	A	0.3847	8.605e-11	-6.49	1.833e-09	0.01874	0.8541	1.178e-05	9.07591e-05	intronic	PPP1R13B	.	.	.
36	rs8021682	14	104289005	C	T	0.3827	9.83e-11	6.47	2.137e-09	0.02015	0.9225	1.195e-05	9.00389e-05	intronic	PPP1R13B	.	.	.
36	rs12893623	14	104290813	G	A	0.3042	2.752e-13	-7.306	2.048e-08	0.03561	0.09081	2.8e-07	3.7228e-05	intronic	PPP1R13B	.	.	.
36	rs4900600	14	104291839	G	A	0.3837	8.301e-11	-6.495	2.352e-09	0.02004	0.8539	1.304e-05	9.00803e-05	intronic	PPP1R13B	.	.	.
36	rs12891399	14	104293533	C	T	0.3042	8.967e-13	-7.146	5.754e-08	0.03227	0.07551	5.239e-07	3.48698e-05	intronic	PPP1R13B	.	.	.
36	rs12890430	14	104293534	G	A	0.3042	9.301e-13	7.14	6.265e-08	0.03275	0.07531	5.053e-07	3.48698e-05	intronic	PPP1R13B	.	.	.
36	rs7159810	14	104294117	G	T	0.3837	6.193e-11	-6.539	1.987e-09	0.01833	0.8335	1.034e-05	0.000102731	intronic	PPP1R13B	.	.	.
36	rs1475007	14	104297147	G	A	0.3837	2.16e-10	-6.349	3.333e-09	0.018	0.752	1.04e-05	8.2124e-05	intronic	PPP1R13B	.	.	.
36	rs8003653	14	104298836	G	A	0.3837	7.907e-11	-6.502	2.844e-09	0.01897	0.8464	1.239e-05	8.66383e-05	intronic	PPP1R13B	.	.	.
36	rs11160765	14	104299730	C	T	0.3837	1.439e-10	-6.412	2.947e-09	0.01896	0.8389	1.336e-05	8.93285e-05	intronic	PPP1R13B	.	.	.
36	rs12588797	14	104300020	C	T	0.3042	3.222e-13	-7.285	3.235e-08	0.03378	0.06289	1.998e-07	3.25694e-05	intronic	PPP1R13B	.	.	.
36	rs8005225	14	104300151	C	T	0.3837	7.198e-11	-6.516	2.747e-09	0.01906	0.8457	1.079e-05	8.62502e-05	intronic	PPP1R13B	.	.	.
36	rs12880167	14	104300829	C	T	0.3847	9.761e-11	6.471	2.228e-09	0.0187	0.7515	9.255e-06	8.62422e-05	intronic	PPP1R13B	.	.	.
36	rs8017200	14	104302883	G	A	0.3032	4.653e-10	6.23	1.05e-07	0.03508	0.07775	0.001079	3.43273e-05	intronic	PPP1R13B	.	.	.
36	rs28533661	14	104305794	G	A	0.3837	7.064e-13	-7.178	2.908e-09	0.01773	0.3654	5.585e-05	8.24062e-05	intronic	PPP1R13B	.	.	.
36	rs1040813	14	104306696	C	T	0.3837	3.673e-11	-6.617	2.758e-09	0.01797	0.6476	1.068e-05	8.14292e-05	intronic	PPP1R13B	.	.	.
36	rs8005536	14	104307553	C	T	0.3847	8.315e-11	-6.495	2.578e-09	0.01683	0.6264	1.177e-05	8.23171e-05	intronic	PPP1R13B	.	.	.
36	rs12879529	14	104307554	G	A	0.3052	5.865e-13	7.204	4.093e-08	0.03135	0.05375	2.652e-07	3.43503e-05	intronic	PPP1R13B	.	.	.
36	rs8011137	14	104308920	G	A	0.3837	3.862e-11	6.609	2.779e-09	0.01831	0.661	9.971e-06	8.30654e-05	intronic	PPP1R13B	.	.	.
36	rs1187417	14	104310025	C	T	0.3042	5.771e-13	7.206	3.428e-08	0.03215	0.05774	7.769e-07	3.25807e-05	intronic	PPP1R13B	.	.	.
36	rs1187416	14	104311465	G	A	0.3837	5.098e-11	-6.568	3.011e-09	0.01708	0.6533	9.142e-06	8.13598e-05	intronic	PPP1R13B	.	.	.
36	rs10083370	14	104314182	G	A	0.3827	2.935e-11	-6.65	2.413e-09	0.1058	0.6566	5.089e-06	7.91116e-05	ncRNA_intronic	PPP1R13B-DT	.	.	.
36	rs4906379	14	104315491	G	A	0.3042	1.625e-13	7.376	3.482e-08	0.2281	0.0446	1.27e-07	3.30864e-05	ncRNA_intronic	PPP1R13B-DT	.	.	.
36	rs12434686	14	104316033	C	T	0.3807	1.803e-10	-6.377	7.229e-09	0.1263	0.6406	7.886e-06	7.91316e-05	ncRNA_intronic	PPP1R13B-DT	.	.	.
36	rs7141473	14	104316055	C	A	0.3807	1.771e-10	6.38	7.238e-09	0.1363	0.6344	7.793e-06	7.91626e-05	ncRNA_intronic	PPP1R13B-DT	.	.	.
36	rs28698555	14	104316486	C	A	0.3827	3.555e-11	-6.622	4.741e-09	0.1013	0.5929	6.648e-06	7.93159e-05	ncRNA_intronic	PPP1R13B-DT	.	.	.
36	rs28612442	14	104316619	C	A	0.3827	3.665e-11	-6.617	4.588e-09	0.1029	0.5938	7.065e-06	7.92465e-05	ncRNA_intronic	PPP1R13B-DT	.	.	.
36	rs11160767	14	104316733	G	A	0.3827	1.59e-11	-6.739	6.503e-09	0.1009	0.6034	6.112e-06	7.92374e-05	ncRNA_intronic	PPP1R13B-DT	.	.	.
36	rs10873539	14	104317045	C	T	0.3827	1.016e-10	-6.465	3.905e-09	0.1032	0.6021	7.191e-06	7.82222e-05	ncRNA_intronic	PPP1R13B-DT	.	.	.
36	rs12890822	14	104318041	C	T	0.3022	3.879e-13	7.26	4.542e-08	0.04039	0.04518	1.863e-07	3.27273e-05	ncRNA_intronic	PPP1R13B-DT	.	.	.
36	rs12892186	14	104318787	C	T	0.3757	1.209e-10	6.438	1.088e-08	0.03312	0.6088	7.317e-06	6.64293e-05	ncRNA_intronic	PPP1R13B-DT	.	.	.
36	rs4606645	14	104319718	G	A	0.3817	1.076e-09	-6.098	6.173e-09	0.0927	0.6259	0.001774	7.83881e-05	ncRNA_intronic	PPP1R13B-DT	.	.	.
36	rs12878678	14	104319730	C	T	0.3807	5.556e-11	-6.555	3.429e-09	0.01776	0.5981	6.801e-06	7.8251e-05	ncRNA_intronic	PPP1R13B-DT	.	.	.
36	rs12892189	14	104319989	C	A	0.3082	1.346e-13	7.402	1.032e-07	0.05687	0.06957	1.476e-07	1.13708e-05	ncRNA_intronic	PPP1R13B-DT	.	.	.
36	rs3861678	14	104322026	G	A	0.3022	1.531e-14	7.685	7.339e-08	0.2203	0.03066	8.203e-08	3.3279e-05	ncRNA_intronic	ENSG00000258534;PPP1R13B-DT	.	.	.
36	rs6576006	14	104322394	C	A	0.3022	3.104e-13	7.29	4.72e-08	0.03558	0.04252	1.462e-07	3.40879e-05	ncRNA_intronic	ENSG00000258534;PPP1R13B-DT	.	.	.
36	rs6576007	14	104323777	G	T	0.3022	8.177e-17	-8.329	5.199e-08	0.2398	0.06509	1.977e-06	3.41798e-05	ncRNA_exonic	PPP1R13B-DT	.	.	.	y
36	rs6576008	14	104324183	G	A	0.3022	1.047e-14	7.733	4.535e-08	0.2263	0.03944	2.71e-07	3.48642e-05	ncRNA_exonic	PPP1R13B-DT	.	.	.
36	rs55696130	14	104341864	G	A	0.3976	1.975e-08	5.614	0.0002467	0.2061	0.06692	2.699e-05	0.000667621	ncRNA_intronic	ENSG00000258534;ENSG00000287346	.	.	.
36	rs10135198	14	104344391	C	T	0.3986	8.009e-12	-6.838	2.775e-08	0.9342	0.04063	7.08e-05	0.000679079	ncRNA_intronic	ENSG00000258534;ENSG00000287346	.	.	.	y
36	rs10438242	14	104345075	C	T	0.3986	9.372e-11	-6.477	2.981e-08	0.9339	0.05438	8.347e-05	0.000711263	ncRNA_intronic	ENSG00000258534;ENSG00000287346	.	.	.
36	rs10438243	14	104345822	G	A	0.3976	1.894e-10	6.37	4.635e-08	0.9894	0.06935	0.0002285	0.000793707	ncRNA_exonic	ENSG00000287346	.	.	.
36	rs10438244	14	104346185	C	T	0.3907	1.249e-10	6.433	1.732e-08	0.2198	0.05964	0.0002311	0.000792173	ncRNA_exonic	ENSG00000287346	.	.	.
36	rs6576010	14	104349602	G	A	0.3956	4.085e-10	6.251	1.96e-08	0.2171	0.07135	9.731e-05	0.000782618	intergenic	ENSG00000287346;ATP5MJ	dist=2884;dist=29023	.	.
36	rs881056	14	104354225	G	A	0.3917	2.262e-09	-5.978	4.684e-09	0.1606	0.06583	0.0001149	0.00154764	intergenic	ENSG00000287346;ATP5MJ	dist=7507;dist=24400	.	.
36	rs881057	14	104354258	G	T	0.3917	1.336e-10	6.423	5.283e-09	0.1632	0.06576	0.0001184	0.00155039	intergenic	ENSG00000287346;ATP5MJ	dist=7540;dist=24367	.	.
36	rs10139856	14	104354505	C	T	0.3917	8.792e-10	6.13	3.981e-09	0.1564	0.06031	0.0001587	0.00144804	intergenic	ENSG00000287346;ATP5MJ	dist=7787;dist=24120	.	.
36	rs761985	14	104355252	G	T	0.3917	6.528e-09	-5.803	3.535e-09	0.1588	0.06323	0.0001091	0.0019143	intergenic	ENSG00000287346;ATP5MJ	dist=8534;dist=23373	.	.
36	rs2019064	14	104355391	C	A	0.3867	1.315e-10	6.425	6.528e-09	0.179	0.06045	0.0001102	0.00159423	intergenic	ENSG00000287346;ATP5MJ	dist=8673;dist=23234	.	.
36	rs8008020	14	104355883	C	T	0.3877	4.056e-10	6.252	1.345e-09	0.2201	0.04708	0.0001029	0.00859568	intergenic	ENSG00000287346;ATP5MJ	dist=9165;dist=22742	.	.
36	rs4144027	14	104357638	C	T	0.3817	2.703e-10	-6.315	7.115e-08	0.1175	0.07415	6.198e-05	0.00027824	intergenic	ENSG00000287346;ATP5MJ	dist=10920;dist=20987	.	.
36	rs4900601	14	104358076	C	T	0.3817	4.444e-10	6.238	1.372e-07	0.1049	0.0801	9.548e-05	0.000339938	intergenic	ENSG00000287346;ATP5MJ	dist=11358;dist=20549	.	.
36	rs35924317	14	104359696	C	T	0.3817	1.761e-10	6.381	7.086e-08	0.1352	0.06669	9.087e-05	0.000353273	intergenic	ENSG00000287346;ATP5MJ	dist=12978;dist=18929	.	.
36	rs12879686	14	104360741	C	T	0.3817	1.728e-10	6.384	9.564e-08	0.1304	0.07213	0.0001128	0.00041944	intergenic	ENSG00000287346;ATP5MJ	dist=14023;dist=17884	.	.
36	rs71417884	14	104361667	C	T	0.3817	3.262e-10	-6.286	1.082e-07	0.1452	0.04343	0.0001363	0.000406537	intergenic	ENSG00000287346;ATP5MJ	dist=14949;dist=16958	.	.
36	rs71417885	14	104361681	G	A	0.3817	1.37e-10	6.419	6.613e-08	0.1336	0.04077	0.0001194	0.000406219	intergenic	ENSG00000287346;ATP5MJ	dist=14963;dist=16944	.	.
36	rs72712857	14	104362673	C	T	0.3807	8.415e-11	-6.493	2.048e-07	0.1883	0.04106	0.0001221	0.000304404	intergenic	ENSG00000287346;ATP5MJ	dist=15955;dist=15952	.	.
37	rs62000222	15	47615845	C	T	0.3638	2.752e-11	6.659	0.02807	0.649	0.007446	2.482e-05	1.87271e-07	intronic	SEMA6D	.	.	.
37	rs6493272	15	47616380	C	T	0.3489	1.55e-09	-6.039	0.02365	0.7462	0.02194	0.0001161	2.3638e-07	intronic	SEMA6D	.	.	.
37	rs7167304	15	47618314	C	T	0.3638	1.539e-11	-6.744	0.03076	0.609	0.005954	1.361e-05	1.65383e-07	intronic	SEMA6D	.	.	.
37	rs10851452	15	47618940	C	T	0.3638	1.582e-11	6.74	0.02794	0.6188	0.00563	1.688e-05	1.7172e-07	intronic	SEMA6D	.	.	.
37	rs11632739	15	47621252	C	A	0.3638	1.928e-11	-6.711	0.02811	0.6394	0.005294	2.365e-05	1.72699e-07	intronic	SEMA6D	.	.	.
37	rs1027460	15	47622837	C	A	0.3638	1.628e-11	6.736	0.02992	0.6407	0.005592	1.593e-05	1.71791e-07	intronic	SEMA6D	.	.	.
37	rs494065	15	47631875	G	A	0.3638	2.303e-11	-6.685	0.02504	0.6396	0.00514	2.26e-05	1.71858e-07	intronic	SEMA6D	.	.	.
37	rs499580	15	47632455	G	A	0.3638	8.08e-11	6.499	0.02632	0.6429	0.005201	2.407e-05	1.73273e-07	intronic	SEMA6D	.	.	.
37	rs623549	15	47634000	C	T	0.3638	8.65e-11	-6.489	0.0264	0.6628	0.005345	2.497e-05	1.71862e-07	intronic	SEMA6D	.	.	.
37	rs16959276	15	47634272	G	A	0.1551	9.079e-09	5.747	2.836e-05	0.4415	0.004784	0.01419	0.00364956	intronic	SEMA6D	.	.	.
37	rs535072	15	47636912	C	T	0.3638	7.536e-11	-6.51	0.02692	0.6094	0.006342	1.585e-05	1.70451e-07	intronic	SEMA6D	.	.	.
37	rs684499	15	47637081	G	A	0.3638	6.514e-11	-6.531	0.02663	0.6364	0.005544	1.575e-05	1.72449e-07	intronic	SEMA6D	.	.	.
37	rs684920	15	47637158	C	A	0.3638	2.837e-11	6.655	0.02631	0.6455	0.005788	1.636e-05	1.72457e-07	intronic	SEMA6D	.	.	.
37	rs685291	15	47637221	G	A	0.3638	2.973e-11	6.648	0.02632	0.65	0.006006	1.634e-05	1.72457e-07	intronic	SEMA6D	.	.	.
37	rs589497	15	47637624	C	T	0.3638	2.517e-11	-6.672	0.02469	0.659	0.00545	1.637e-05	1.72457e-07	intronic	SEMA6D	.	.	.
37	rs565085	15	47637842	G	A	0.3489	8.268e-10	6.14	0.02109	0.7063	0.02191	9.445e-05	2.39502e-07	intronic	SEMA6D	.	.	.
37	rs590777	15	47637888	G	A	0.3638	2.865e-11	-6.653	0.02478	0.6577	0.005816	1.828e-05	1.63316e-07	intronic	SEMA6D	.	.	.
37	rs590869	15	47637953	G	A	0.3638	7.335e-11	-6.514	0.02478	0.6577	0.00591	1.799e-05	1.45355e-07	intronic	SEMA6D	.	.	.
37	rs590898	15	47637971	G	A	0.3638	7.123e-11	6.518	0.02445	0.6577	0.006152	1.636e-05	1.45663e-07	intronic	SEMA6D	.	.	.
37	rs569842	15	47638382	G	A	0.3489	9.434e-10	6.119	0.02117	0.7046	0.02465	9.218e-05	2.37301e-07	intronic	SEMA6D	.	.	.
37	rs593094	15	47638438	G	T	0.3638	7.655e-11	-6.507	0.02443	0.6076	0.006242	1.629e-05	1.72508e-07	intronic	SEMA6D	.	.	.
37	rs6493273	15	47638551	C	T	0.3638	1.583e-10	-6.397	0.02632	0.7268	0.009816	2.03e-05	1.7189e-07	intronic	SEMA6D	.	.	.
37	rs606602	15	47639132	G	A	0.3638	4.828e-11	-6.576	0.02408	0.5983	0.005531	1.624e-05	1.49858e-07	intronic	SEMA6D	.	.	.
37	rs606997	15	47639215	C	T	0.3648	6.246e-11	-6.538	0.02415	0.6	0.005508	2.116e-05	1.71894e-07	intronic	SEMA6D	.	.	.
37	rs488732	15	47639240	C	T	0.3648	6.71e-11	6.527	0.02444	0.5995	0.006022	1.993e-05	1.71894e-07	intronic	SEMA6D	.	.	.
37	rs607473	15	47639333	G	A	0.3638	3.417e-08	-5.519	0.02259	0.6004	0.01098	0.1809	1.725e-07	intronic	SEMA6D	.	.	.
37	rs489692	15	47639354	C	T	0.3638	6.563e-11	-6.53	0.02407	0.592	0.006709	1.646e-05	1.72504e-07	intronic	SEMA6D	.	.	.
37	rs621423	15	47640115	G	A	0.3638	4.945e-14	7.533	1.65e-05	0.5733	0.006347	1.927e-05	1.71305e-07	intronic	SEMA6D	.	.	.
37	rs518222	15	47640224	C	T	0.3638	2.912e-14	7.602	1.442e-05	0.5765	0.006217	1.133e-05	1.7394e-07	intronic	SEMA6D	.	.	.
37	rs578458	15	47640787	C	T	0.3638	1.031e-13	7.437	1.183e-05	0.5949	0.006016	1.868e-05	1.65295e-07	intronic	SEMA6D	.	.	.
37	rs12908163	15	47641522	C	T	0.3638	1.111e-14	7.726	7.224e-06	0.5924	0.006192	1.905e-05	1.71997e-07	intronic	SEMA6D	.	.	.	y
37	rs648585	15	47641688	G	T	0.3638	2.035e-13	7.347	7.116e-06	0.5899	0.005884	1.885e-05	1.72612e-07	intronic	SEMA6D	.	.	.
37	rs649483	15	47641899	G	A	0.3638	2.445e-13	7.322	8.971e-06	0.5898	0.005599	1.979e-05	1.72612e-07	intronic	SEMA6D	.	.	.
37	rs499491	15	47642034	G	A	0.3648	2.199e-13	7.336	8.256e-06	0.5463	0.005825	1.93e-05	1.72492e-07	intronic	SEMA6D	.	.	.
37	rs4611398	15	47642480	C	T	0.3638	2.134e-14	7.642	7.602e-06	0.5586	0.005533	1.995e-05	1.72473e-07	intronic	SEMA6D	.	.	.
37	rs1486898	15	47642503	C	T	0.1551	3.869e-08	5.497	1.536e-05	0.09776	0.005186	0.01189	0.00375249	intronic	SEMA6D	.	.	.
37	rs4270118	15	47642581	C	T	0.3638	2.217e-14	7.637	8.276e-06	0.5586	0.005462	1.977e-05	1.71854e-07	intronic	SEMA6D	.	.	.
37	rs4516168	15	47642618	G	A	0.3489	2.75e-12	6.99	4.821e-06	0.6237	0.02386	0.0001097	2.36499e-07	intronic	SEMA6D	.	.	.
37	rs4611399	15	47642735	C	T	0.3638	2.607e-14	7.616	9.511e-06	0.5549	0.005567	2.06e-05	1.72477e-07	intronic	SEMA6D	.	.	.
37	rs1486899	15	47642763	G	A	0.3638	2.469e-14	7.623	9.586e-06	0.5549	0.005409	2e-05	1.72477e-07	intronic	SEMA6D	.	.	.
37	rs1486900	15	47642886	G	T	0.1551	2.141e-08	5.6	1.257e-05	0.1015	0.005559	0.01265	0.00375267	intronic	SEMA6D	.	.	.
37	rs1486901	15	47642993	G	A	0.3489	1.209e-10	6.438	4.907e-06	0.2827	0.02523	0.0001098	2.36499e-07	intronic	SEMA6D	.	.	.
37	rs531595	15	47643253	G	A	0.3638	1.191e-12	7.106	1.034e-05	0.2495	0.005927	2.012e-05	1.72477e-07	intronic	SEMA6D	.	.	.
37	rs557899	15	47643795	C	A	0.3489	1.431e-10	6.413	5.824e-06	0.2818	0.02635	0.000116	2.37285e-07	intronic	SEMA6D	.	.	.
37	rs653298	15	47644409	G	T	0.3638	8.063e-12	6.837	9.469e-06	0.2528	0.005736	1.979e-05	1.51558e-07	intronic	SEMA6D	.	.	.
37	rs653749	15	47644528	G	A	0.3638	1.005e-11	-6.806	1.172e-05	0.2525	0.005944	1.99e-05	1.72651e-07	intronic	SEMA6D	.	.	.
37	rs665751	15	47644963	C	T	0.3628	1.323e-14	7.704	1.153e-05	0.5752	0.005153	2.068e-05	1.72651e-07	intronic	SEMA6D	.	.	.
37	rs73403005	15	47645174	G	A	0.1551	4.183e-08	-5.483	4.761e-06	0.1358	0.005817	0.01578	0.00386848	intronic	SEMA6D	.	.	.
37	rs1496919	15	47645491	G	A	0.3638	3.589e-12	-6.952	1.102e-05	0.2853	0.005245	1.983e-05	1.72223e-07	intronic	SEMA6D	.	.	.
37	rs16959322	15	47645660	C	A	0.1551	2.758e-08	5.556	1.031e-05	0.12	0.005137	0.01269	0.00375223	intronic	SEMA6D	.	.	.
37	rs1390876	15	47645789	G	A	0.3638	1.097e-13	7.429	1.171e-05	0.5602	0.006076	2.012e-05	1.72631e-07	intronic	SEMA6D	.	.	.
37	rs1390877	15	47645892	C	T	0.3489	3.899e-11	6.608	5.033e-06	0.3155	0.02348	0.000108	2.38046e-07	intronic	SEMA6D	.	.	.
37	rs955686	15	47645956	C	T	0.3638	8.281e-14	7.466	1.089e-05	0.5602	0.005064	2.01e-05	1.72445e-07	intronic	SEMA6D	.	.	.
37	rs955685	15	47646032	G	A	0.3638	8.226e-14	-7.467	1.145e-05	0.5611	0.004816	2.063e-05	1.7185e-07	intronic	SEMA6D	.	.	.
37	rs590247	15	47647560	C	T	0.3559	2.01e-10	-6.361	2.508e-05	0.286	0.02144	9.487e-05	2.80098e-07	intronic	SEMA6D	.	.	.
37	rs591143	15	47647755	C	T	0.3708	1.463e-10	-6.409	0.05382	0.715	0.004934	1.591e-05	2.02442e-07	intronic	SEMA6D	.	.	.
37	rs281274	15	47659445	C	T	0.3628	5.544e-12	-6.891	1.472e-05	0.2659	0.0323	1.794e-05	3.10899e-08	ncRNA_intronic	ENSG00000259221	.	.	.
37	rs281280	15	47661369	G	A	0.3618	2.49e-11	-6.674	8.882e-06	0.267	0.02896	2.074e-05	3.10899e-08	ncRNA_intronic	ENSG00000259221	.	.	.
37	rs281258	15	47672201	C	T	0.3638	4.246e-12	-6.929	7.53e-06	0.2966	0.01992	2.529e-05	3.07971e-08	ncRNA_intronic	ENSG00000259221	.	.	.
37	rs281259	15	47672312	C	T	0.3638	3.1e-12	-6.973	6.854e-06	0.2963	0.0204	1.606e-05	3.06577e-08	ncRNA_intronic	ENSG00000259221	.	.	.
37	rs281260	15	47673928	C	T	0.3638	3.55e-12	-6.954	4.895e-06	0.2984	0.02078	2.893e-05	2.64911e-08	ncRNA_intronic	ENSG00000259221	.	.	.
37	rs175979	15	47674812	G	A	0.3638	5.442e-13	7.214	2.17e-06	0.29	0.01988	1.895e-05	1.97843e-08	ncRNA_intronic	ENSG00000259221	.	.	.
37	rs281264	15	47675569	G	A	0.3439	2.928e-10	-6.303	1.223e-05	0.2842	0.01041	7.196e-05	1.95862e-08	ncRNA_intronic	ENSG00000259221	.	.	.
37	rs35534970	15	47675585	G	A	0.2068	3.182e-11	6.638	4.133e-06	0.2189	0.01417	0.0004638	1.69212e-08	ncRNA_intronic	ENSG00000259221	.	.	.
37	rs281265	15	47675602	C	A	0.3439	3.381e-10	-6.28	1.262e-05	0.2844	0.01044	9.012e-05	1.95686e-08	ncRNA_intronic	ENSG00000259221	.	.	.
37	rs12910916	15	47675655	C	T	0.2068	4.804e-11	6.577	4.765e-06	0.2173	0.01436	0.0004576	1.05363e-08	ncRNA_intronic	ENSG00000259221	.	.	.
37	rs7174904	15	47676110	C	T	0.2068	3.275e-11	6.634	4.419e-06	0.2211	0.01311	0.0004486	1.89544e-08	ncRNA_intronic	ENSG00000259221	.	.	.
37	rs7175414	15	47676200	G	A	0.2068	3.662e-11	6.617	4.596e-06	0.2195	0.01288	0.0005339	1.89535e-08	ncRNA_intronic	ENSG00000259221	.	.	.
37	rs7174964	15	47676228	C	A	0.2068	3.193e-11	-6.637	4.532e-06	0.2195	0.01293	0.000466	1.72179e-08	ncRNA_intronic	ENSG00000259221	.	.	.
37	rs6493274	15	47676489	C	A	0.2068	2.989e-11	-6.647	4.368e-06	0.2194	0.01277	0.0004404	1.90029e-08	ncRNA_intronic	ENSG00000259221	.	.	.
37	rs8040191	15	47676716	C	T	0.2068	4.074e-11	6.601	5.388e-06	0.2188	0.01395	0.0004591	2.11252e-08	ncRNA_intronic	ENSG00000259221	.	.	.
37	rs8040226	15	47676830	G	A	0.2068	4.496e-11	-6.587	5.632e-06	0.2196	0.01358	0.0005899	1.91113e-08	ncRNA_intronic	ENSG00000259221	.	.	.
37	rs8041603	15	47676855	C	T	0.2068	4.309e-11	-6.593	5.547e-06	0.2202	0.01301	0.0005952	1.91113e-08	ncRNA_intronic	ENSG00000259221	.	.	.
37	rs2433018	15	47677596	G	A	0.3111	4.265e-11	-6.595	0.0001201	0.2801	0.05049	0.0001802	9.35233e-09	ncRNA_intronic	ENSG00000259221	.	.	.
37	rs7166534	15	47678132	C	T	0.2068	4.067e-11	-6.602	5.873e-06	0.2186	0.01247	0.0005664	1.91113e-08	ncRNA_intronic	ENSG00000259221	.	.	.
37	rs4485292	15	47678898	G	A	0.2068	2.099e-11	6.699	6.274e-06	0.2252	0.01274	0.0006589	1.91113e-08	ncRNA_intronic	ENSG00000259221	.	.	.
37	rs12904595	15	47679524	C	T	0.2068	9.793e-12	-6.81	2.525e-06	0.233	0.01291	0.0006269	1.91113e-08	ncRNA_intronic	ENSG00000259221	.	.	.
37	rs2132661	15	47679726	G	A	0.2068	9.059e-12	-6.821	2.198e-06	0.2329	0.0129	0.0006273	1.91113e-08	ncRNA_intronic	ENSG00000259221	.	.	.
37	rs2132660	15	47679807	G	A	0.2068	9.004e-12	-6.822	2.222e-06	0.2315	0.0129	0.0006279	1.91113e-08	ncRNA_intronic	ENSG00000259221	.	.	.	y
37	rs8032333	15	47680567	G	A	0.2068	1.574e-11	-6.741	2.852e-06	0.2127	0.013	0.0005789	1.90673e-08	ncRNA_intronic	ENSG00000259221	.	.	.
37	rs35473814	15	47680662	G	A	0.2068	2.267e-11	6.688	2.92e-06	0.2643	0.01297	0.000581	1.90042e-08	ncRNA_intronic	ENSG00000259221	.	.	.
37	rs34794623	15	47680801	C	A	0.2068	1.105e-11	6.792	2.919e-06	0.2643	0.01291	0.0005822	1.8978e-08	ncRNA_intronic	ENSG00000259221	.	.	.
37	rs35175834	15	47680815	G	A	0.2068	1.039e-11	6.801	2.913e-06	0.2643	0.0129	0.0005372	1.89644e-08	ncRNA_intronic	ENSG00000259221	.	.	.
37	rs281286	15	47681250	C	T	0.3479	1.838e-11	-6.718	1.321e-05	0.2954	0.01581	4.249e-05	1.76104e-07	ncRNA_intronic	ENSG00000259221	.	.	.
37	rs8034190	15	47681367	G	A	0.2028	4.775e-11	6.578	7.936e-07	0.2574	0.01465	0.001877	1.90287e-08	ncRNA_intronic	ENSG00000259221	.	.	.
37	rs8033799	15	47681384	C	A	0.2028	6.337e-11	-6.536	7.503e-07	0.291	0.01444	0.001099	1.90279e-08	ncRNA_intronic	ENSG00000259221	.	.	.
37	rs12910487	15	47681390	C	T	0.2028	5.499e-11	6.557	8.109e-07	0.2574	0.01453	0.001118	1.90279e-08	ncRNA_intronic	ENSG00000259221	.	.	.
37	rs281287	15	47681552	G	A	0.3559	1.642e-11	-6.735	6.294e-06	0.2848	0.009344	4.411e-05	8.69581e-08	ncRNA_intronic	ENSG00000259221	.	.	.
37	rs281289	15	47682079	G	A	0.3479	4.254e-11	-6.595	1.447e-05	0.2985	0.01455	5.52e-05	1.75906e-07	ncRNA_intronic	ENSG00000259221	.	.	.
37	rs281291	15	47682428	G	A	0.3479	4.785e-11	-6.577	1.508e-05	0.309	0.0146	5.804e-05	1.758e-07	ncRNA_intronic	ENSG00000259221	.	.	.
37	rs281293	15	47683333	G	A	0.3489	1.367e-10	6.42	1.211e-05	0.3056	0.01807	5.626e-05	1.71333e-07	ncRNA_intronic	ENSG00000259221	.	.	.
37	rs4404005	15	47684196	C	T	0.3479	7.41e-11	6.512	1.03e-05	0.2982	0.01279	4.883e-05	1.63912e-07	ncRNA_intronic	ENSG00000259221	.	.	.
37	rs12907546	15	47684280	G	A	0.2068	4.714e-11	6.58	3.958e-06	0.2196	0.01116	0.0006161	1.74502e-08	ncRNA_intronic	ENSG00000259221	.	.	.
37	rs4497626	15	47684508	G	A	0.3479	3.343e-12	-6.962	1.839e-05	0.2949	0.01138	4.957e-05	1.64505e-07	ncRNA_intronic	ENSG00000259221	.	.	.
37	rs4338738	15	47684530	G	A	0.3479	3.233e-12	6.967	1.678e-05	0.298	0.0116	4.86e-05	1.63347e-07	ncRNA_intronic	ENSG00000259221	.	.	.
37	rs4511474	15	47684680	G	A	0.3479	3.482e-12	6.957	1.482e-05	0.3085	0.01181	5.36e-05	1.63279e-07	ncRNA_intronic	ENSG00000259221	.	.	.
37	rs59321834	15	47684725	G	A	0.3479	1.471e-09	6.048	1.143e-05	0.3182	0.01512	0.09725	1.62821e-07	ncRNA_intronic	ENSG00000259221	.	.	.
37	rs1025142	15	47684932	C	A	0.3479	2.04e-11	-6.703	1.651e-05	0.2969	0.0117	8.453e-05	1.6131e-07	ncRNA_intronic	ENSG00000259221	.	.	.
37	rs34488670	15	47684936	C	T	0.2068	1.595e-11	-6.739	2.648e-06	0.2327	0.01041	0.001157	1.73524e-08	ncRNA_intronic	ENSG00000259221	.	.	.
37	rs281296	15	47685010	G	A	0.3559	7.985e-12	6.839	3.649e-06	0.2863	0.009217	4.669e-05	7.72129e-08	ncRNA_intronic	ENSG00000259221	.	.	.
37	rs1025143	15	47685059	C	T	0.3559	7.456e-13	-7.171	3.752e-06	0.2778	0.00746	4.997e-05	7.78341e-08	ncRNA_intronic	ENSG00000259221	.	.	.
37	rs1025144	15	47685080	G	A	0.3479	7.159e-11	-6.517	1.307e-05	0.3017	0.01229	6.33e-05	1.61187e-07	ncRNA_intronic	ENSG00000259221	.	.	.
38	rs12232639	18	26570703	G	A	0.3052	3.288e-08	-5.525	0.09209	0.1925	0.01304	8.11e-07	0.00133764	intergenic	ENSG00000265994;RNU6-408P	dist=201159;dist=57881	.	.	y
39	rs16992771	19	5046070	C	T	0.3469	4.118e-08	-5.486	0.0001824	0.006526	0.002138	0.03778	0.043378	intronic	KDM4B	.	.	.
39	rs2613766	19	5066995	C	T	0.4483	2.123e-08	5.602	3.177e-06	0.01474	0.002422	0.05653	0.0344882	intronic	KDM4B	.	.	.	y
40	rs516246	19	49206172	C	T	0.4414	2.21e-08	5.595	9.938e-10	0.002336	0.01053	0.7467	0.0844209	intronic	FUT2	.	.	.
40	rs492602	19	49206417	G	A	0.4414	2.51e-08	-5.573	8.084e-10	0.002489	0.01042	0.734	0.0731055	exonic	FUT2	.	synonymous SNV	FUT2:ENST00000391876.5_1:exon2:c.A204G:p.A68A,FUT2:ENST00000425340.3_3:exon2:c.A204G:p.A68A
40	rs681343	19	49206462	C	T	0.4404	2.516e-08	5.572	1.102e-09	0.002617	0.008621	0.7383	0.073731	exonic	FUT2	.	synonymous SNV	FUT2:ENST00000391876.5_1:exon2:c.C249T:p.Y83Y,FUT2:ENST00000425340.3_3:exon2:c.C249T:p.Y83Y
40	rs601338	19	49206674	G	A	0.4414	4.085e-08	5.487	1.71e-09	0.002904	0.01167	0.7521	0.0697574	exonic	FUT2	.	stopgain	FUT2:ENST00000391876.5_1:exon2:c.G461A:p.W154X,FUT2:ENST00000425340.3_3:exon2:c.G461A:p.W154X
40	rs485073	19	49207255	G	A	0.4692	2.44e-08	-5.577	4.981e-09	0.001798	0.008297	0.6183	0.117926	UTR3	FUT2	ENST00000425340.3_3:c.*10A>G;ENST00000391876.5_1:c.*10A>G	.	.
40	rs603985	19	49207257	C	T	0.4692	2.819e-08	-5.552	4.103e-09	0.001816	0.008791	0.6694	0.117892	UTR3	FUT2	ENST00000425340.3_3:c.*12T>C;ENST00000391876.5_1:c.*12T>C	.	.
40	rs2638280	19	49209318	G	A	0.4702	7.045e-09	5.79	1.452e-08	0.001843	0.01491	0.7526	0.104293	downstream	FUT2	dist=110	.	.
40	rs2548458	19	49209325	C	T	0.4702	3.683e-09	5.898	8.91e-09	0.001521	0.01491	0.758	0.115568	downstream	FUT2	dist=117	.	.
40	rs479486	19	49229323	G	A	0.493	2.801e-08	5.553	2.524e-09	0.00188	0.009014	0.998	0.0428776	intronic	RASIP1	.	.	.
40	rs418464	19	49239026	C	T	0.4602	1.789e-08	-5.631	1.986e-09	0.0004011	0.002748	0.8719	0.0536673	intronic	RASIP1	.	.	.
40	rs1231281	19	49239200	G	A	0.4583	2.247e-09	5.979	1.726e-09	0.0007259	0.002477	0.8603	0.047203	intronic	RASIP1	.	.	.	y
40	rs380743	19	49241014	G	A	0.4583	8.215e-09	5.764	3.186e-09	0.0005063	0.004847	0.9644	0.0736326	intronic	RASIP1	.	.	.
40	rs427248	19	49241015	C	T	0.4583	8.43e-09	5.76	3.602e-09	0.0005033	0.004975	0.9587	0.0718671	intronic	RASIP1	.	.	.
40	rs973579	19	49241976	G	A	0.4602	1.21e-08	-5.698	1.705e-09	0.0005966	0.002824	0.8986	0.0516095	intronic	RASIP1	.	.	.

## Sheet: S3.AA.sig.SNPs
Locus	rsID	chr	pos	non_Effect_Allele	Effect_Allele	1KG.AFR.MAF	Meta.P	Meta.beta	AUD.P	OUD.P	CUD.P	TUD.P	Func.ensGene	Gene.ensGene	GeneDetail.ensGene	ExonicFunc.ensGene	AAChange.ensGene	independent
1	rs16871560	5	3269938	C	T	0.3064	2.492e-09	-5.962	1.628e-05	0.3321	0.001124	0.0004388	intergenic	LINC01377;LINC01019	dist=88337;dist=147328	.	.	y

## Sheet: S4.LA.sig.SNPs
Locus	rsID	chr	pos	non_Effect_Allele	Effect_Allele	1KG.AMR.MAF	Meta.P	Meta.beta	AUD.P	OUD.P	Func.ensGene	Gene.ensGene	GeneDetail.ensGene	ExonicFunc.ensGene	AAChange.ensGene	Independent
1	rs1229984	4	100239319	C	T	0.05764	3.551e-08	-5.512	5.812e-17	0.0940119	exonic	ADH1B	.	synonymous SNV	ADH1B:ENST00000305046.13_6:exon3:c.A143A:p.H48H,ADH1B:ENST00000625860.2_5:exon3:c.A23A:p.H8H,ADH1B:ENST00000506651.5_4:exon4:c.A23A:p.H8H	y
2	rs540090452	6	21362610	G	A	0.01729	2.344e-08	5.584	0.01774	3.19254e-08	intergenic	ENSG00000227089;ENSG00000286368	dist=7083;dist=7311	.	.	y
2	rs73377013	6	22200119	C	T	0.01009	7.865e-09	5.771	0.002677	8.0387e-08	ncRNA_intronic	CASC15	.	.	.	y
2	rs73736884	6	22211769	G	T	0.01153	2.355e-08	-5.584	0.0005818	1.2132e-06	ncRNA_intronic	CASC15	.	.	.
3	rs114451688	6	24394166	C	T	0.01153	4.639e-08	-5.465	0.03573	2.79801e-08	intergenic	RNU6-391P;MRS2	dist=28184;dist=8970	.	.
3	rs115133207	6	24394925	C	T	0.01153	3.976e-08	5.492	0.03877	2.03284e-08	intergenic	RNU6-391P;MRS2	dist=28943;dist=8211	.	.	y
3	rs115031116	6	24394968	C	A	0.01153	4.475e-08	5.471	0.03573	2.67169e-08	intergenic	RNU6-391P;MRS2	dist=28986;dist=8168	.	.
3	rs75488772	6	24395236	C	T	0.01153	4.845e-08	-5.457	0.03653	2.86195e-08	intergenic	RNU6-391P;MRS2	dist=29254;dist=7900	.	.

## Sheet: S5.AA.EA.sig.SNPs
Locus	rsID	chr	pos	non_Effect_Allele	Effect_allele	1KG.EUR.MAF	1KG.AFR.MAF	Meta.P	Meta.beta	AA.AUD.P	AA.OUD.P	AA.CUD.P	AA.TUD.P	EA.AUD.P	EA.OUD.P	EA.CUD.P	EA.TUD.P	Finngen.SUD.P	Func.ensGene	Gene.ensGene	GeneDetail.ensGene	ExonicFunc.ensGene	AAChange.ensGene	Independent
1	rs12729364	1	66415035	G	A	0.2714	0.1036	2.488e-08	5.574	0.1303	0.4883	0.1914	0.3069	0.01844	0.01184	0.0009761	0.01933	0.00404036	intronic	PDE4B	.	.	.
1	rs6691929	1	66435953	G	A	0.2893	0.1808	5.913e-10	6.193	0.5329	0.8714	0.9046	0.4504	3.247e-08	0.02408	0.00448	0.03058	0.000208238	intronic	PDE4B	.	.	.
1	rs1937441	1	66437733	G	A	0.2883	0.1808	2.335e-09	5.973	0.5611	0.867	0.83	0.4424	2.684e-08	0.02483	0.006729	0.03988	0.000220049	intronic	PDE4B	.	.	.
1	rs1937436	1	66441329	G	A	0.2883	0.1823	1.51e-09	-6.043	0.5785	0.9377	0.8609	0.4363	1.907e-08	0.024	0.007204	0.04166	0.000218801	intronic	PDE4B	.	.	.
1	rs12564578	1	66445516	G	A	0.2883	0.1808	4.926e-10	-6.221	0.5611	0.9053	0.8467	0.4362	1.588e-08	0.02433	0.007144	0.04773	0.000219099	intronic	PDE4B	.	.	.	y
2	rs7517355	1	73784077	G	A	0.4215	0.5265	5.05e-11	6.569	0.007307	0.1926	0.03225	0.3998	1.154e-06	0.009779	0.01213	0.01134	0.00679235	ncRNA_intronic	LINC01360	.	.	.
2	rs2340398	1	73788694	C	T	0.4215	0.5265	4.398e-11	6.59	0.00806	0.1794	0.0297	0.4313	1.075e-06	0.009229	0.01204	0.01095	0.00678907	ncRNA_intronic	LINC01360	.	.	.
2	rs11210209	1	73793245	G	A	0.4215	0.5287	3.849e-11	-6.61	0.01118	0.1719	0.04028	0.3622	8.89e-07	0.009326	0.01166	0.01132	0.00677407	ncRNA_intronic	LINC01360	.	.	.
2	rs1885246	1	73793499	C	T	0.4215	0.4599	4.278e-11	6.594	0.05496	0.0628	0.09463	0.684	1.071e-06	0.007765	0.01027	0.01125	0.00700761	ncRNA_intronic	LINC01360	.	.	.
2	rs1885247	1	73793630	G	A	0.4215	0.4418	2.251e-11	6.689	0.03996	0.04193	0.03359	0.8663	1.22e-06	0.007693	0.01198	0.01142	0.00678907	ncRNA_intronic	LINC01360	.	.	.
2	rs1923206	1	73799968	G	T	0.4215	0.534	2.72e-11	-6.661	0.01306	0.173	0.04625	0.377	9.203e-07	0.009711	0.01233	0.01082	0.00673023	ncRNA_intronic	LINC01360	.	.	.
2	rs1120979	1	73804712	C	T	0.4215	0.447	1.488e-10	-6.407	0.0531	0.04327	0.03267	0.907	4.633e-07	0.007906	0.02804	0.1229	0.0067911	ncRNA_intronic	LINC01360	.	.	.
2	rs1120981	1	73805179	C	T	0.4215	0.447	2.442e-11	-6.677	0.05367	0.04279	0.03244	0.895	1.014e-06	0.007906	0.01164	0.01052	0.00679141	ncRNA_intronic	LINC01360	.	.	.
2	rs6689226	1	73806923	C	T	0.4225	0.5318	2.899e-11	6.652	0.01056	0.1986	0.0339	0.4307	9.418e-07	0.009464	0.01216	0.0117	0.00679016	ncRNA_intronic	LINC01360	.	.	.
2	rs2208565	1	73810229	G	A	0.4215	0.5333	1.858e-11	-6.717	0.01284	0.1821	0.04166	0.3775	8.396e-07	0.007966	0.01028	0.01086	0.00679219	ncRNA_intronic	LINC01360	.	.	.
2	rs1951361	1	73811954	G	A	0.4215	0.4705	2.73e-11	-6.66	0.04862	0.1135	0.05563	0.7262	9.747e-07	0.005852	0.01074	0.009412	0.00679157	ncRNA_intronic	LINC01360	.	.	.
2	rs1923211	1	73814908	C	T	0.4215	0.5287	1.616e-11	6.737	0.01168	0.1865	0.03607	0.3704	7.439e-07	0.00774	0.01034	0.009868	0.00674373	ncRNA_intronic	LINC01360	.	.	.
2	rs1923212	1	73814973	C	A	0.4215	0.5287	1.522e-11	6.746	0.01155	0.1985	0.0373	0.3601	7.447e-07	0.007733	0.01017	0.009872	0.00672853	ncRNA_intronic	LINC01360	.	.	.
2	rs6668602	1	73817816	G	A	0.4215	0.534	1.849e-11	-6.717	0.01322	0.1882	0.04519	0.3733	7.387e-07	0.007952	0.01007	0.009858	0.00706757	ncRNA_intronic	LINC01360	.	.	.
2	rs10493516	1	73818516	G	A	0.4215	0.5287	1.679e-11	6.732	0.01165	0.1886	0.04202	0.3587	6.927e-07	0.007752	0.01053	0.009777	0.00706155	ncRNA_intronic	LINC01360	.	.	.
2	rs2180946	1	73819848	G	A	0.4215	0.5189	1.882e-11	-6.715	0.02219	0.1653	0.0413	0.4295	6.994e-07	0.007493	0.009556	0.009826	0.00705862	ncRNA_intronic	LINC01360	.	.	.
2	rs2340399	1	73821093	C	T	0.4215	0.5121	1.745e-11	6.726	0.01627	0.191	0.03045	0.4751	7.251e-07	0.007293	0.009558	0.009485	0.00705879	downstream	LINC01360	dist=159	.	.
2	rs2340400	1	73821281	C	T	0.4235	0.5552	4.348e-11	6.592	0.01677	0.2259	0.1149	0.5413	7.166e-07	0.00528	0.009429	0.0195	0.00790205	downstream	LINC01360	dist=347	.	.
2	rs6655995	1	73821577	C	A	0.4215	0.5121	1.748e-11	-6.726	0.01654	0.191	0.0302	0.4738	8.125e-07	0.007148	0.009092	0.009564	0.00705407	downstream	LINC01360	dist=643	.	.
2	rs6673702	1	73821779	G	T	0.4215	0.5174	2.057e-11	6.702	0.01931	0.1913	0.03535	0.4868	7.312e-07	0.007399	0.009903	0.009498	0.00705407	downstream	LINC01360	dist=845	.	.
2	rs10890034	1	73824279	G	A	0.4215	0.5234	1.257e-11	-6.774	0.01586	0.1126	0.04973	0.4544	6.975e-07	0.00779	0.009413	0.009866	0.00734311	intergenic	LINC01360;LINC02238	dist=3345;dist=276620	.	.
2	rs6681595	1	73827012	G	T	0.4215	0.5136	1.59e-11	-6.739	0.01903	0.1751	0.0381	0.4177	6.345e-07	0.007177	0.00936	0.009677	0.00705326	intergenic	LINC01360;LINC02238	dist=6078;dist=273887	.	.
2	rs10890035	1	73828271	G	A	0.4215	0.4266	1.756e-11	6.725	0.06677	0.06163	0.02271	0.9968	9.018e-07	0.005801	0.00997	0.009114	0.00705326	intergenic	LINC01360;LINC02238	dist=7337;dist=272628	.	.
2	rs1923216	1	73829128	C	T	0.4235	0.5643	3.438e-11	-6.626	0.01611	0.1556	0.1517	0.5436	6.989e-07	0.005152	0.009748	0.01825	0.00863436	intergenic	LINC01360;LINC02238	dist=8194;dist=271771	.	.
2	rs7415137	1	73829928	G	A	0.4215	0.5136	1.586e-11	6.74	0.02007	0.165	0.03935	0.4185	6.771e-07	0.007221	0.009403	0.009368	0.00705505	intergenic	LINC01360;LINC02238	dist=8994;dist=270971	.	.
2	rs10890036	1	73830081	C	T	0.4215	0.5144	1.693e-11	6.73	0.02191	0.168	0.03949	0.4178	6.948e-07	0.007222	0.009404	0.009368	0.00705505	intergenic	LINC01360;LINC02238	dist=9147;dist=270818	.	.
2	rs10749821	1	73833914	C	T	0.4215	0.5113	1.456e-11	6.752	0.01559	0.1915	0.03349	0.4736	6.469e-07	0.007216	0.009671	0.009081	0.00704709	intergenic	LINC01360;LINC02238	dist=12980;dist=266985	.	.
2	rs11210215	1	73834346	C	T	0.4215	0.5121	1.506e-11	6.747	0.0173	0.1931	0.03481	0.4622	6.557e-07	0.007216	0.009672	0.008862	0.00704693	intergenic	LINC01360;LINC02238	dist=13412;dist=266553	.	.
2	rs2340401	1	73835726	C	T	0.4215	0.4289	1.608e-11	6.738	0.08151	0.05463	0.03094	0.9197	7.086e-07	0.005742	0.01067	0.008507	0.00702571	intergenic	LINC01360;LINC02238	dist=14792;dist=265173	.	.
2	rs2340403	1	73835777	C	T	0.4215	0.5227	1.24e-11	-6.775	0.02295	0.1126	0.03946	0.42	5.595e-07	0.00708	0.01011	0.009591	0.00702846	intergenic	LINC01360;LINC02238	dist=14843;dist=265122	.	.	y
2	rs12128161	1	73837417	C	A	0.4235	0.497	4.421e-11	-6.589	0.1053	0.06062	0.1327	0.8633	6.351e-07	0.004359	0.01175	0.01621	0.00859231	intergenic	LINC01360;LINC02238	dist=16483;dist=263482	.	.
2	rs12128235	1	73837608	C	A	0.4215	0.4569	1.559e-11	-6.742	0.1103	0.03985	0.05045	0.7102	6.797e-07	0.005846	0.01055	0.00895	0.00708158	intergenic	LINC01360;LINC02238	dist=16674;dist=263291	.	.
2	rs1923223	1	73839564	C	T	0.4215	0.444	4.076e-11	6.601	0.1116	0.09432	0.01902	0.772	5.725e-07	0.006258	0.01059	0.009595	0.00699439	intergenic	LINC01360;LINC02238	dist=18630;dist=261335	.	.
2	rs1923224	1	73839921	C	T	0.4215	0.4546	3.053e-11	6.644	0.08926	0.04988	0.04625	0.778	5.916e-07	0.006311	0.01088	0.009829	0.00699439	intergenic	LINC01360;LINC02238	dist=18987;dist=260978	.	.
2	rs7554968	1	73840843	C	T	0.4215	0.4387	3.048e-11	6.644	0.1098	0.05864	0.02678	0.8134	5.106e-07	0.006009	0.01034	0.01015	0.00699455	intergenic	LINC01360;LINC02238	dist=19909;dist=260056	.	.
2	rs11210216	1	73842480	G	A	0.4165	0.4539	4.876e-11	6.575	0.1099	0.06091	0.03139	0.7803	4.3e-07	0.005783	0.01168	0.01222	0.00838745	intergenic	LINC01360;LINC02238	dist=21546;dist=258419	.	.
2	rs7544965	1	73842685	C	T	0.4165	0.4274	3.897e-11	-6.608	0.0729	0.06687	0.02566	0.9683	4.606e-07	0.005794	0.01158	0.01173	0.00838745	intergenic	LINC01360;LINC02238	dist=21751;dist=258214	.	.
2	rs7516608	1	73843213	G	T	0.4165	0.4274	4.152e-11	6.599	0.07354	0.07166	0.02566	0.9675	4.676e-07	0.005831	0.01154	0.01185	0.00838764	intergenic	LINC01360;LINC02238	dist=22279;dist=257686	.	.
2	rs10890037	1	73845254	G	A	0.4165	0.444	3.677e-11	6.617	0.1222	0.09532	0.02029	0.7655	4.39e-07	0.006128	0.01177	0.01131	0.00838784	intergenic	LINC01360;LINC02238	dist=24320;dist=255645	.	.
2	rs10736419	1	73845941	C	T	0.4165	0.4531	5.225e-11	6.564	0.1094	0.06027	0.02988	0.7798	4.401e-07	0.005854	0.0122	0.01235	0.00838803	intergenic	LINC01360;LINC02238	dist=25007;dist=254958	.	.
2	rs11210217	1	73846542	G	A	0.4165	0.4539	3.706e-11	6.615	0.07037	0.03526	0.04819	0.7738	4.483e-07	0.005955	0.01354	0.01225	0.00838803	intergenic	LINC01360;LINC02238	dist=25608;dist=254357	.	.
2	rs7515828	1	73848331	C	T	0.4304	0.5174	1.275e-11	6.771	0.1265	0.01507	0.1272	0.8505	8.602e-08	0.001907	0.02173	0.0222	0.0100647	intergenic	LINC01360;LINC02238	dist=27397;dist=252568	.	.
2	rs7546987	1	73848505	C	T	0.4314	0.5174	5.172e-11	-6.566	0.1176	0.01556	0.129	0.8462	9.978e-08	0.001625	0.02804	0.02945	0.0126229	intergenic	LINC01360;LINC02238	dist=27571;dist=252394	.	.
2	rs7547059	1	73848537	C	A	0.4364	0.5174	4.259e-11	-6.595	0.1281	0.01753	0.1208	0.8803	5.467e-08	0.001485	0.03351	0.03499	0.0140663	intergenic	LINC01360;LINC02238	dist=27603;dist=252362	.	.
2	rs12135094	1	73848944	C	T	0.4354	0.5197	9.044e-11	-6.482	0.157	0.01417	0.1287	0.8558	4.593e-08	0.00147	0.1573	0.05611	0.0140579	intergenic	LINC01360;LINC02238	dist=28010;dist=251955	.	.
2	rs12120214	1	73848985	G	A	0.4354	0.5197	3.976e-11	-6.605	0.159	0.01428	0.1301	0.8486	5.018e-08	0.001513	0.03206	0.02847	0.0140579	intergenic	LINC01360;LINC02238	dist=28051;dist=251914	.	.
2	rs12127629	1	73848987	C	A	0.4354	0.5197	3.985e-11	6.605	0.1591	0.01428	0.1301	0.8488	5.034e-08	0.001513	0.03206	0.02848	0.0140579	intergenic	LINC01360;LINC02238	dist=28053;dist=251912	.	.
2	rs11210219	1	73849016	G	A	0.4354	0.5197	4.052e-11	-6.602	0.1579	0.01464	0.1301	0.8492	5.103e-08	0.001517	0.03206	0.0285	0.0140579	intergenic	LINC01360;LINC02238	dist=28082;dist=251883	.	.
2	rs10789370	1	73849297	G	A	0.4354	0.5197	3.129e-11	-6.64	0.1598	0.01453	0.129	0.8592	4.389e-08	0.00149	0.03551	0.03423	0.0140576	intergenic	LINC01360;LINC02238	dist=28363;dist=251602	.	.
2	rs11210220	1	73849655	G	T	0.4354	0.5197	3.389e-11	6.629	0.1601	0.01471	0.1287	0.8589	5.221e-08	0.001534	0.03451	0.03441	0.0140676	intergenic	LINC01360;LINC02238	dist=28721;dist=251244	.	.
2	rs11210221	1	73849673	C	T	0.4354	0.5197	4.176e-11	6.598	0.1552	0.01696	0.1238	0.8746	5.115e-08	0.001897	0.03504	0.034	0.0140288	intergenic	LINC01360;LINC02238	dist=28739;dist=251226	.	.
2	rs11210222	1	73849687	C	T	0.4354	0.5197	3.299e-11	6.633	0.1595	0.01471	0.1314	0.8709	4.941e-08	0.001536	0.03423	0.03436	0.0140288	intergenic	LINC01360;LINC02238	dist=28753;dist=251212	.	.
2	rs6671002	1	73851752	G	A	0.4354	0.4818	5.582e-11	6.555	0.1677	0.0176	0.09344	0.9306	4.619e-08	0.001421	0.03436	0.03763	0.0140614	intergenic	LINC01360;LINC02238	dist=30818;dist=249147	.	.
2	rs6671203	1	73851936	G	A	0.4354	0.5197	4.467e-11	6.588	0.1602	0.0152	0.1528	0.8706	4.946e-08	0.001544	0.03167	0.03506	0.0140647	intergenic	LINC01360;LINC02238	dist=31002;dist=248963	.	.
2	rs6673919	1	73852090	C	T	0.4354	0.5189	3.547e-11	6.622	0.1694	0.01621	0.1533	0.8604	5.359e-08	0.001481	0.03465	0.03416	0.0130455	intergenic	LINC01360;LINC02238	dist=31156;dist=248809	.	.
2	rs11210225	1	73852585	G	A	0.4354	0.5204	6.526e-11	-6.531	0.1462	0.01978	0.1403	0.8918	5.645e-08	0.00148	0.03486	0.03458	0.0140624	intergenic	LINC01360;LINC02238	dist=31651;dist=248314	.	.
2	rs1923230	1	73852765	C	T	0.4354	0.5197	5.545e-11	6.556	0.1597	0.01928	0.15	0.8804	5.512e-08	0.001487	0.03486	0.03392	0.0140624	intergenic	LINC01360;LINC02238	dist=31831;dist=248134	.	.
2	rs1923231	1	73852939	C	T	0.4354	0.5197	5.654e-11	6.553	0.1571	0.0194	0.1494	0.8825	5.586e-08	0.00153	0.03486	0.03394	0.0140343	intergenic	LINC01360;LINC02238	dist=32005;dist=247960	.	.
2	rs1923233	1	73853460	C	T	0.4354	0.5197	5.694e-11	-6.552	0.1618	0.01917	0.1297	0.889	6.164e-08	0.001488	0.03479	0.03398	0.0140634	intergenic	LINC01360;LINC02238	dist=32526;dist=247439	.	.
2	rs1923234	1	73853481	G	A	0.4354	0.5197	5.663e-11	-6.552	0.1592	0.01917	0.1296	0.8893	6.198e-08	0.001488	0.03485	0.03398	0.0140634	intergenic	LINC01360;LINC02238	dist=32547;dist=247418	.	.
2	rs1923236	1	73853826	C	T	0.4354	0.5197	5.396e-11	6.56	0.1619	0.01932	0.1286	0.8476	5.914e-08	0.001493	0.03481	0.03348	0.014064	intergenic	LINC01360;LINC02238	dist=32892;dist=247073	.	.
2	rs12044079	1	73854147	C	T	0.4354	0.5189	4.006e-11	-6.604	0.166	0.01927	0.1159	0.8816	6.155e-08	0.0009177	0.03541	0.03368	0.0140657	intergenic	LINC01360;LINC02238	dist=33213;dist=246752	.	.
2	rs11210226	1	73854284	G	A	0.4354	0.5197	4.204e-11	6.597	0.157	0.01959	0.1276	0.8975	6.017e-08	0.0009242	0.03658	0.03401	0.0140657	intergenic	LINC01360;LINC02238	dist=33350;dist=246615	.	.
2	rs11210227	1	73855015	C	A	0.4344	0.5197	4.41e-11	-6.59	0.1594	0.01849	0.1277	0.9064	5.918e-08	0.001075	0.03599	0.03307	0.0141991	intergenic	LINC01360;LINC02238	dist=34081;dist=245884	.	.
2	rs1338645	1	73855051	G	A	0.4344	0.5197	4.472e-11	-6.588	0.1615	0.01849	0.1277	0.9065	6.189e-08	0.001075	0.03599	0.03286	0.0140637	intergenic	LINC01360;LINC02238	dist=34117;dist=245848	.	.
2	rs34547319	1	73855495	G	T	0.4354	0.5197	4.074e-11	6.601	0.1607	0.01955	0.1276	0.8996	6.002e-08	0.0009193	0.0356	0.0337	0.0140624	intergenic	LINC01360;LINC02238	dist=34561;dist=245404	.	.
2	rs55994666	1	73856091	C	A	0.4354	0.5197	4.031e-11	6.603	0.1537	0.01897	0.1273	0.9	6.318e-08	0.0009365	0.03402	0.03412	0.0146636	intergenic	LINC01360;LINC02238	dist=35157;dist=244808	.	.
2	rs6701544	1	73856471	C	T	0.4354	0.5189	4.156e-11	6.598	0.1802	0.01777	0.1404	0.8787	6.593e-08	0.0008865	0.035	0.03343	0.0140627	intergenic	LINC01360;LINC02238	dist=35537;dist=244428	.	.
2	rs6704376	1	73856841	C	T	0.4354	0.5197	4.159e-11	6.598	0.1592	0.0202	0.1276	0.9025	6.109e-08	0.0009535	0.035	0.03347	0.0140624	intergenic	LINC01360;LINC02238	dist=35907;dist=244058	.	.
2	rs6704461	1	73856933	C	T	0.4354	0.5197	1.116e-10	6.45	0.1612	0.01944	0.1276	0.903	6.074e-08	0.0008548	0.03509	0.03352	0.0140627	intergenic	LINC01360;LINC02238	dist=35999;dist=243966	.	.
2	rs6689493	1	73857058	C	T	0.4344	0.5197	2.944e-11	-6.649	0.156	0.02035	0.1275	0.9033	5.26e-08	0.0009959	0.03486	0.03338	0.0140627	intergenic	LINC01360;LINC02238	dist=36124;dist=243841	.	.
2	rs1984201	1	73857097	C	T	0.4354	0.5197	2.664e-11	6.664	0.1573	0.02064	0.1225	0.9101	5.236e-08	0.0009289	0.03511	0.03136	0.0140627	intergenic	LINC01360;LINC02238	dist=36163;dist=243802	.	.
2	rs1856410	1	73857494	G	A	0.4354	0.5197	2.707e-11	6.662	0.1478	0.02048	0.1276	0.9038	5.215e-08	0.0009173	0.03511	0.03347	0.014031	intergenic	LINC01360;LINC02238	dist=36560;dist=243405	.	.
2	rs1338654	1	73857724	G	T	0.4354	0.5197	2.391e-11	-6.68	0.1468	0.01965	0.1229	0.9056	4.869e-08	0.0008953	0.03528	0.03498	0.0125722	intergenic	LINC01360;LINC02238	dist=36790;dist=243175	.	.
2	rs5015579	1	73857839	G	T	0.4344	0.5197	3.811e-11	-6.611	0.1388	0.01964	0.1187	0.9036	4.65e-08	0.0009308	0.03706	0.03294	0.0128136	intergenic	LINC01360;LINC02238	dist=36905;dist=243060	.	.
2	rs5015578	1	73857844	G	A	0.4344	0.5197	3.783e-11	6.612	0.1374	0.01973	0.1187	0.9037	4.422e-08	0.0009603	0.03693	0.03295	0.0128136	intergenic	LINC01360;LINC02238	dist=36910;dist=243055	.	.
2	rs11809026	1	73858039	C	T	0.4354	0.5197	2.095e-11	-6.699	0.1496	0.01953	0.1276	0.9046	4.589e-08	0.0009196	0.03522	0.03367	0.011144	intergenic	LINC01360;LINC02238	dist=37105;dist=242860	.	.
2	rs11805813	1	73858079	G	A	0.4354	0.5197	2.315e-11	6.685	0.1496	0.01955	0.1276	0.9047	4.379e-08	0.0009198	0.03538	0.03364	0.0128136	intergenic	LINC01360;LINC02238	dist=37145;dist=242820	.	.
2	rs11805871	1	73858463	G	A	0.4354	0.5197	3.13e-11	6.64	0.1466	0.01955	0.1276	0.9059	3.136e-08	0.0009167	0.0343	0.03364	0.0128133	intergenic	LINC01360;LINC02238	dist=37529;dist=242436	.	.
2	rs11809098	1	73858561	C	T	0.4354	0.5197	2.993e-11	-6.647	0.1472	0.02031	0.1276	0.9059	2.96e-08	0.0008402	0.03488	0.0337	0.0128159	intergenic	LINC01360;LINC02238	dist=37627;dist=242338	.	.
2	rs11809486	1	73858941	C	T	0.4354	0.5182	4.807e-11	-6.577	0.1304	0.01925	0.1217	0.9024	5.698e-08	0.0009372	0.03461	0.03358	0.0140861	intergenic	LINC01360;LINC02238	dist=38007;dist=241958	.	.
2	rs11210228	1	73859290	G	T	0.4334	0.5182	1.732e-10	6.383	0.143	0.01911	0.1117	0.8875	2.977e-08	0.0009078	0.07623	0.2347	0.0148916	intergenic	LINC01360;LINC02238	dist=38356;dist=241609	.	.
2	rs11804814	1	73859292	C	T	0.4334	0.5182	3.049e-11	6.644	0.1431	0.01911	0.1117	0.8876	2.967e-08	0.0009078	0.07624	0.2343	0.0144331	intergenic	LINC01360;LINC02238	dist=38358;dist=241607	.	.
2	rs10890039	1	73859300	G	A	0.4334	0.5182	4.624e-11	-6.583	0.1446	0.01888	0.1095	0.8879	4.342e-08	0.000919	0.03388	0.03037	0.0144378	intergenic	LINC01360;LINC02238	dist=38366;dist=241599	.	.
2	rs6696623	1	73859367	C	T	0.4344	0.5197	4.475e-11	-6.587	0.1411	0.01978	0.1229	0.9114	5.012e-08	0.0009271	0.03529	0.03286	0.0154821	intergenic	LINC01360;LINC02238	dist=38433;dist=241532	.	.
2	rs11210229	1	73860028	G	A	0.4354	0.5197	7.033e-11	6.52	0.1355	0.01734	0.1048	0.9143	6.409e-08	0.0009209	0.03729	0.04286	0.0153236	intergenic	LINC01360;LINC02238	dist=39094;dist=240871	.	.
2	rs1923238	1	73860311	C	A	0.4354	0.5197	9.121e-11	6.481	0.1433	0.01887	0.1048	0.9168	5.941e-08	0.0009306	0.03948	0.04921	0.0153883	intergenic	LINC01360;LINC02238	dist=39377;dist=240588	.	.
2	rs12031120	1	73860821	G	A	0.4354	0.5197	2.023e-11	-6.704	0.1354	0.01666	0.1047	0.9161	1.175e-08	0.0008591	0.08031	0.2958	0.0138989	intergenic	LINC01360;LINC02238	dist=39887;dist=240078	.	.
2	rs1338651	1	73861924	C	A	0.4354	0.5234	4.575e-11	-6.584	0.1159	0.01665	0.08634	0.8718	5.333e-08	0.0008415	0.04063	0.0378	0.0139056	intergenic	LINC01360;LINC02238	dist=40990;dist=238975	.	.
2	rs10159196	1	73863269	C	T	0.4354	0.5234	6.017e-11	-6.543	0.1352	0.01798	0.08634	0.8735	5.271e-08	0.0009412	0.04041	0.03818	0.0151269	intergenic	LINC01360;LINC02238	dist=42335;dist=237630	.	.
2	rs1885249	1	73865740	G	A	0.4354	0.5091	4.5e-11	6.587	0.197	0.009689	0.04879	0.908	5.332e-08	0.001007	0.04182	0.03864	0.0137316	intergenic	LINC01360;LINC02238	dist=44806;dist=235159	.	.
2	rs1416268	1	73866272	C	T	0.4354	0.5091	4.687e-11	6.581	0.1973	0.009784	0.04391	0.9097	5.52e-08	0.001005	0.04147	0.04058	0.0137316	intergenic	LINC01360;LINC02238	dist=45338;dist=234627	.	.
2	rs1416269	1	73866598	G	A	0.4354	0.5091	4.524e-11	6.586	0.2028	0.009771	0.04391	0.911	4.879e-08	0.001008	0.04143	0.04059	0.0137312	intergenic	LINC01360;LINC02238	dist=45664;dist=234301	.	.
2	rs12035848	1	73870901	G	A	0.4354	0.5946	1.098e-10	-6.453	0.007504	0.04016	0.1286	0.4984	5.609e-08	0.001237	0.03998	0.04252	0.0137142	intergenic	LINC01360;LINC02238	dist=49967;dist=229998	.	.
2	rs12043387	1	73871205	G	A	0.4354	0.5946	1.609e-11	6.738	0.007348	0.04031	0.1276	0.5127	5.605e-08	0.00124	0.04085	0.04225	0.0151471	intergenic	LINC01360;LINC02238	dist=50271;dist=229694	.	.
2	rs1475064	1	73882478	G	A	0.4354	0.5946	2.013e-11	6.705	0.006903	0.041	0.1636	0.5219	2.822e-08	0.001178	0.03627	0.03761	0.0150966	intergenic	LINC01360;LINC02238	dist=61544;dist=218421	.	.
2	rs12731986	1	73884838	C	T	0.4354	0.5946	1.863e-10	-6.372	0.4961	0.03984	0.1177	0.5088	4.673e-07	0.001182	0.03367	0.03805	0.0148505	intergenic	LINC01360;LINC02238	dist=63904;dist=216061	.	.
3	rs6726012	2	22431291	G	T	0.4592	0.3517	6.499e-09	5.803	0.4668	0.3538	0.1276	0.1407	0.4368	0.08297	0.0006059	5.19e-07	0.0301856	ncRNA_intronic	ENSG00000228999	.	.	.
3	rs12616418	2	22435519	C	T	0.4662	0.3517	3.497e-09	-5.906	0.3782	0.4218	0.1238	0.1327	0.3703	0.08685	0.001494	2.575e-07	0.0331291	ncRNA_intronic	ENSG00000228999	.	.	.
3	rs10193722	2	22439514	C	A	0.4632	0.3495	1.598e-09	-6.034	0.3029	0.394	0.102	0.1693	0.3421	0.1015	0.002093	2.183e-07	0.0248525	ncRNA_intronic	ENSG00000228999	.	.	.	y
3	rs11124322	2	22442392	G	A	0.4672	0.3472	1.849e-09	6.011	0.3901	0.3987	0.09298	0.178	0.3486	0.1134	0.003163	2.501e-07	0.0270097	ncRNA_intronic	ENSG00000228999	.	.	.
3	rs4557006	2	22443840	G	A	0.4652	0.3464	2.876e-09	5.939	0.4916	0.3466	0.09294	0.1962	0.3733	0.1198	0.001637	1.566e-07	0.030418	ncRNA_intronic	ENSG00000228999	.	.	.
3	rs4321395	2	22444221	G	A	0.4642	0.3464	3.76e-09	5.894	0.4434	0.3379	0.09179	0.1888	0.4023	0.1135	0.001761	2.575e-07	0.0271888	ncRNA_intronic	ENSG00000228999	.	.	.
3	rs4330131	2	22445880	G	A	0.4642	0.3457	5.245e-09	5.839	0.4341	0.3398	0.08126	0.1804	0.4356	0.1218	0.001961	3.233e-07	0.0275835	ncRNA_intronic	ENSG00000228999	.	.	.
3	rs13387284	2	22448133	G	A	0.4612	0.348	1.576e-08	5.653	0.4182	0.358	0.08325	0.2145	0.4439	0.1472	0.002929	2.57e-07	0.0221009	ncRNA_intronic	ENSG00000228999	.	.	.
3	rs4258826	2	22455419	G	A	0.4652	0.4213	2.554e-08	-5.57	0.04969	0.01145	0.2827	0.3803	0.332	0.2808	0.002684	4.762e-07	0.027264	ncRNA_intronic	ENSG00000228999	.	.	.
3	rs10865093	2	22459372	C	T	0.4602	0.3495	8.963e-09	-5.749	0.03637	0.3329	0.1024	0.193	0.4582	0.1652	0.001941	3.24e-07	0.0321907	ncRNA_intronic	ENSG00000228999	.	.	.
3	rs4073951	2	22463471	C	T	0.4592	0.351	6.594e-09	5.801	0.4513	0.3636	0.1161	0.221	0.4135	0.1758	0.001526	5.418e-07	0.0281449	ncRNA_intronic	ENSG00000228999	.	.	.
3	rs11124367	2	22515351	C	T	0.4861	0.0651	1.097e-09	-6.095	0.2107	0.001968	0.8249	0.8943	0.5316	0.1276	6.195e-06	2.321e-07	0.0973868	ncRNA_intronic	ENSG00000228999	.	.	.	y
3	rs12373752	2	22515568	G	A	0.4861	0.0643	1.179e-09	-6.083	0.2162	0.002173	0.8376	0.9018	0.5401	0.1226	6.154e-06	2.47e-07	0.097672	ncRNA_intronic	ENSG00000228999	.	.	.
3	rs11674333	2	22517989	G	A	0.4861	0.0643	2.027e-09	5.996	0.2219	0.002134	0.8688	0.902	0.5586	0.1209	7.832e-06	2.578e-07	0.0947982	ncRNA_intronic	ENSG00000228999	.	.	.
3	rs12615053	2	22526880	G	T	0.4861	0.0643	3.632e-09	5.9	0.3901	0.002129	0.8321	0.895	0.491	0.1177	6.043e-06	4.477e-07	0.0941066	ncRNA_intronic	ENSG00000228999	.	.	.
4	rs2220152	2	22834065	C	T	0.3191	0.3396	4.389e-08	5.474	0.4579	0.0325	0.8867	0.8308	0.04165	0.4306	9.316e-05	0.0002941	0.00657976	intergenic	LINC01884;RN7SKP27	dist=62397;dist=250359	.	.
4	rs4524148	2	22834908	C	T	0.3191	0.3396	3.991e-08	-5.491	0.4179	0.03297	0.8174	0.8226	0.04742	0.4229	8.906e-05	0.0003081	0.00687369	intergenic	LINC01884;RN7SKP27	dist=63240;dist=249516	.	.
4	rs1881558	2	22835072	C	T	0.3191	0.3396	3.874e-08	5.496	0.4191	0.03257	0.806	0.8196	0.04579	0.4254	8.837e-05	0.0003112	0.00687591	intergenic	LINC01884;RN7SKP27	dist=63404;dist=249352	.	.
4	rs4665510	2	22838110	C	T	0.3191	0.3374	3.555e-08	-5.512	0.3494	0.03868	0.8078	0.796	0.05008	0.4396	0.000107	0.0002671	0.00691067	intergenic	LINC01884;RN7SKP27	dist=66442;dist=246314	.	.
4	rs4665511	2	22838139	G	A	0.3191	0.3374	3.53e-08	5.513	0.3504	0.03893	0.8078	0.7956	0.04901	0.4466	0.0001069	0.0002586	0.0069113	intergenic	LINC01884;RN7SKP27	dist=66471;dist=246285	.	.
4	rs11685129	2	22838710	C	T	0.3191	0.3374	3.094e-08	5.536	0.356	0.03919	0.8076	0.7913	0.04933	0.4243	9.974e-05	0.0002454	0.0069215	intergenic	LINC01884;RN7SKP27	dist=67042;dist=245714	.	.
4	rs1881557	2	22839670	G	A	0.3191	0.3381	2.67e-08	5.562	0.3458	0.03879	0.709	0.7823	0.04781	0.4364	9.999e-05	0.0002476	0.00693378	intergenic	LINC01884;RN7SKP27	dist=68002;dist=244754	.	.
4	rs6720574	2	22844229	C	T	0.3181	0.3359	1.063e-09	6.1	0.4143	0.06528	0.5597	0.6533	0.03936	0.4222	1.301e-05	0.0002997	0.00936289	intergenic	LINC01884;RN7SKP27	dist=72561;dist=240195	.	.
4	rs13012903	2	22888130	G	A	0.3728	0.5219	2.93e-10	6.302	0.6215	0.7986	0.09316	0.2211	0.03019	0.1419	1.205e-06	0.002105	0.00334927	intergenic	LINC01884;RN7SKP27	dist=116462;dist=196294	.	.	y
5	rs4953152	2	45170153	G	A	0.3082	0.3722	3.488e-09	5.907	0.2082	0.5546	0.709	0.03183	1.85e-12	0.9859	0.3186	0.0008728	0.00160653	intronic	SIX3	.	.	.	y
6	rs11309539	2	58025739	TA	T	0.3748	0.2549	2.455e-08	5.576	0.4524	0.5744	0.3235	0.783	7.044e-12	0.6536	0.7749	0.1388	0.00813786	.	.	.	.	.	y
7	rs4858830	3	48734002	C	T	0.2227	0.1392	2.145e-08	5.6	0.9672	0.9633	0.1484	0.1111	3.789e-05	0.005039	0.06562	0.05256	0.000138153	intronic	IP6K2	.	.	.
7	rs6442129	3	48735256	C	T	0.2227	0.1392	1.86e-08	5.625	0.9664	0.9765	0.1417	0.1111	3.811e-05	0.004794	0.06498	0.05345	0.000138153	intronic	IP6K2	.	.	.
7	rs9882443	3	48749064	G	A	0.2157	0.0998	6.435e-09	-5.805	0.9651	0.7528	0.3083	0.02566	2.55e-05	0.005056	0.04472	0.05043	0.000139136	intronic	IP6K2	.	.	.
7	rs4858800	3	48755820	G	A	0.2227	0.1377	1.142e-08	5.708	0.7545	0.9003	0.1352	0.1106	3.199e-05	0.005618	0.06605	0.0486	0.000122809	intergenic	IP6K2;PRKAR2A	dist=1109;dist=28199	.	.
7	rs10865953	3	48759562	C	T	0.2237	0.1399	9.11e-09	-5.747	0.929	0.9223	0.3253	0.1154	3.462e-05	0.005425	0.0595	0.03734	0.000128375	intergenic	IP6K2;PRKAR2A	dist=4851;dist=24457	.	.
7	rs6766238	3	48801929	G	A	0.2187	0.1014	2.898e-09	-5.937	0.1296	0.922	0.9012	0.3444	5.304e-05	0.004734	0.04661	0.02106	9.5284e-05	intronic	PRKAR2A	.	.	.
7	rs9859473	3	48837182	C	T	0.2187	0.0991	2.324e-09	5.973	0.06686	0.9093	0.9322	0.371	8.362e-05	0.004224	0.04155	0.01969	9.15082e-05	intronic	PRKAR2A	.	.	.
7	rs7611628	3	48838364	C	T	0.2187	0.1006	2.225e-09	5.98	0.06582	0.8963	0.9179	0.3463	8.485e-05	0.004488	0.04074	0.01926	9.15166e-05	intronic	PRKAR2A	.	.	.
7	rs9879978	3	48846600	G	T	0.2197	0.1014	1.937e-09	6.003	0.06536	0.8903	0.9187	0.3364	7.462e-05	0.004112	0.04108	0.01945	9.15082e-05	intronic	PRKAR2A	.	.	.
7	rs4974088	3	48898749	C	T	0.2177	0.0098	4.295e-09	5.872	0.9572	0.534	0.4958	0.1774	0.0001037	0.006686	0.04547	0.01836	9.65873e-05	intronic	SLC25A20	.	.	.
7	rs7611358	3	48927856	C	T	0.2197	0.1014	6.333e-10	-6.182	0.07058	0.9652	0.9287	0.3824	0.0001037	0.00485	0.05496	0.01785	0.000100693	intronic	SLC25A20	.	.	.
7	rs7621226	3	48928759	C	T	0.2197	0.1021	5.593e-10	6.201	0.06566	0.9613	0.9632	0.381	0.0001011	0.004807	0.05229	0.01752	0.000100693	intronic	SLC25A20	.	.	.
7	rs12715430	3	48942855	C	A	0.2197	0.0991	1.887e-09	6.007	0.06543	0.8976	0.8864	0.4074	8.682e-05	0.004562	0.0405	0.01731	9.86984e-05	intergenic	SLC25A20;ARIH2OS	dist=6518;dist=12360	.	.
7	rs11707968	3	48953349	C	T	0.2197	0.0991	1.567e-09	-6.037	0.06703	0.8819	0.8945	0.4042	8.468e-05	0.004707	0.03644	0.01481	0.000110459	intergenic	SLC25A20;ARIH2OS	dist=17012;dist=1866	.	.
7	rs9284886	3	48960572	G	A	0.2197	0.0998	2.688e-08	5.561	0.05911	0.9511	0.8709	0.4067	0.0001071	0.0047	0.04333	0.1554	0.000120973	intronic	ARIH2	.	.	.
7	rs7653408	3	48972351	C	A	0.2197	0.0991	1.969e-09	6	0.06625	0.8877	0.8998	0.4158	7.774e-05	0.004779	0.04325	0.01524	0.000120083	intronic	ARIH2	.	.	.
7	rs9864243	3	48982732	G	A	0.2197	0.1036	1.597e-09	-6.034	0.06973	0.9336	0.8576	0.4527	8.422e-05	0.005016	0.03619	0.01821	0.000115958	intronic	ARIH2	.	.	.
7	rs6446204	3	49034879	C	T	0.2167	0.0098	3.048e-09	5.929	0.7418	0.5106	0.5056	0.1777	0.0001236	0.006648	0.05014	0.01587	8.37375e-05	intronic	P4HTM	.	.	.
7	rs4974081	3	49070499	C	T	0.2197	0.0976	2.327e-09	-5.973	0.0802	0.8826	0.9403	0.2825	0.0001399	0.004492	0.02989	0.01502	7.77106e-05	intronic	ENSG00000290315;QRICH1	.	.	.
7	rs6787808	3	49079105	C	T	0.2197	0.0976	2.192e-09	5.983	0.08179	0.8822	0.9464	0.291	0.000167	0.004466	0.02696	0.01373	7.75408e-05	intronic	ENSG00000290315;QRICH1	.	.	.
7	rs4955426	3	49143438	C	A	0.1998	0.0091	1.755e-09	-6.019	0.8413	0.3831	0.8789	0.1698	0.0002618	0.007575	0.02418	0.03263	3.89296e-06	intergenic	QARS1;USP19	dist=1247;dist=2041	.	.
7	rs9865051	3	49166069	C	T	0.2087	0.1006	1.842e-09	-6.011	0.1722	0.6842	0.9172	0.2567	0.0004732	0.005958	0.01883	0.03543	4.00433e-06	intronic	LAMB2	.	.	.
7	rs6778080	3	49317338	C	T	0.2435	0.2912	1.073e-10	6.456	0.4414	0.3815	0.7453	0.1656	5.639e-06	0.005628	0.02796	0.074	7.69768e-07	intronic	USP4	.	.	.
7	rs4955440	3	49388633	C	T	0.2316	0.2821	3.532e-10	6.273	0.2687	0.8109	0.6019	0.09605	3.097e-06	0.00766	0.01123	0.08839	8.66423e-06	intergenic	USP4;GPX1	dist=11147;dist=5974	.	.
7	rs11720657	3	49392620	G	A	0.2316	0.2897	1.715e-10	6.385	0.2398	0.9022	0.5801	0.0773	2.64e-06	0.007681	0.012	0.09254	8.05137e-06	intergenic	USP4;GPX1	dist=15134;dist=1987	.	.
7	rs3448	3	49396751	C	T	0.2316	0.2814	5.95e-10	6.192	0.2175	0.8009	0.9399	0.2529	2.738e-06	0.00758	0.01257	0.08171	8.41938e-06	UTR3	RHOA	ENST00000422781.6_6:c.*1048G>A;ENST00000678200.1_2:c.*891G>A;ENST00000454011.7_6:c.*1079G>A;ENST00000678921.2_5:c.*3172G>A;ENST00000676712.2_5:c.*891G>A;ENST00000418115.6_6:c.*891G>A	.	.
7	rs6446262	3	49401153	C	T	0.2316	0.1021	4.595e-11	6.584	0.3497	0.4468	0.8594	0.6112	3.445e-06	0.008226	0.01391	0.08425	7.9704e-06	intronic	ENSG00000290318;RHOA	.	.	.
7	rs11130190	3	49402137	C	T	0.2316	0.2821	2.128e-10	6.352	0.2517	0.8116	0.6183	0.1065	2.733e-06	0.007654	0.01332	0.08425	7.95738e-06	intronic	ENSG00000290318;RHOA	.	.	.
7	rs9812360	3	49402351	C	T	0.2316	0.1021	4.089e-11	6.601	0.3495	0.4468	0.8594	0.6112	3.438e-06	0.008151	0.01314	0.08115	7.94859e-06	intronic	ENSG00000290318;RHOA	.	.	.	y
7	rs4955413	3	49410066	C	A	0.2316	0.2821	2.277e-10	6.341	0.2398	0.8073	0.6142	0.1062	2.76e-06	0.007672	0.01475	0.08468	7.93725e-06	intronic	ENSG00000290318;RHOA	.	.	.
7	rs9842132	3	49427933	G	A	0.2316	0.2821	2.291e-10	6.34	0.2689	0.708	0.6049	0.1064	2.717e-06	0.008004	0.01255	0.08484	1.28053e-05	intronic	ENSG00000290318;RHOA	.	.	.
7	rs9861027	3	49436584	C	T	0.2316	0.2821	1.694e-10	6.387	0.2673	0.7047	0.6049	0.1063	3.242e-06	0.007911	0.01167	0.07977	7.92903e-06	intronic	ENSG00000290318;RHOA	.	.	.
7	rs7648995	3	49438803	C	T	0.2316	0.2821	1.907e-10	6.369	0.2415	0.7047	0.6049	0.1063	3.456e-06	0.007911	0.01276	0.0841	7.92903e-06	intronic	ENSG00000290318;RHOA	.	.	.
7	rs2140270	3	49439440	G	A	0.2316	0.2821	1.832e-10	-6.375	0.2338	0.7047	0.6078	0.1063	3.471e-06	0.007911	0.01245	0.08416	7.92903e-06	intronic	ENSG00000290318;RHOA	.	.	.
7	rs62259947	3	49439924	C	T	0.2316	0.1021	2.947e-10	-6.302	0.2851	0.3867	0.8867	0.6135	4.318e-06	0.008446	0.01211	0.08194	7.92903e-06	intronic	ENSG00000290318;RHOA	.	.	.
7	rs13061396	3	49444904	C	T	0.2326	0.413	7.317e-10	6.159	0.3517	0.9841	0.4472	0.68	3.162e-06	0.01059	0.007498	0.6605	7.89423e-06	intronic	ENSG00000290318;RHOA	.	.	.
7	rs73088137	3	49448423	G	A	0.2316	0.1014	3.369e-10	6.281	0.3127	0.3792	0.8868	0.6142	4.728e-06	0.008285	0.01252	0.08405	7.89369e-06	intronic	ENSG00000290318;RHOA	.	.	.
7	rs7620024	3	49451691	G	A	0.2316	0.2829	6.271e-10	6.183	0.2285	0.7033	0.5925	0.1246	3.832e-06	0.00813	0.01219	0.08544	7.89369e-06	intronic	TCTA	.	.	.
7	rs8897	3	49460407	C	T	0.2316	0.2844	2.671e-10	6.317	0.2655	0.7703	0.6249	0.1134	4.72e-06	0.008405	0.0113	0.08743	7.89369e-06	UTR3	NICN1	ENST00000273598.8_7:c.*1859G>A;ENST00000615713.4_6:c.*1203G>A	.	.
7	rs6446275	3	49466871	G	A	0.2316	0.2829	4.333e-10	-6.242	0.2194	0.6931	0.593	0.1093	4.395e-06	0.007966	0.01118	0.09173	7.89369e-06	upstream	ENSG00000283189;NICN1	dist=112	.	.
7	rs62259933	3	49469703	G	A	0.2316	0.2821	3.03e-10	6.297	0.2296	0.6621	0.6624	0.1235	6.143e-06	0.007975	0.01068	0.09375	7.89369e-06	intergenic	NICN1;DAG1	dist=2944;dist=36443	.	.
7	rs9654010	3	49480908	C	T	0.2316	0.2829	2.896e-10	-6.304	0.249	0.6855	0.5798	0.1107	7.034e-06	0.007874	0.01102	0.09374	7.47498e-06	intergenic	NICN1;DAG1	dist=14149;dist=25238	.	.
7	rs138084484	3	49483193	C	T	0.2306	0.1014	7.8e-10	6.149	0.4433	0.3502	0.9357	0.7044	5.019e-06	0.007651	0.0101	0.08751	7.47498e-06	intergenic	NICN1;DAG1	dist=16434;dist=22953	.	.
7	rs113741748	3	49490780	G	A	0.2316	0.2829	1.19e-10	6.441	0.2679	0.6879	0.5706	0.1115	6.886e-06	0.007594	0.007992	0.09399	7.09643e-06	intergenic	NICN1;DAG1	dist=24021;dist=15366	.	.
7	rs9860055	3	49506900	C	T	0.2316	0.2829	1.764e-10	6.381	0.2487	0.6912	0.5687	0.1125	4.074e-06	0.007553	0.009679	0.09302	9.95291e-06	intronic	DAG1	.	.	.
7	rs7613491	3	49508976	C	T	0.2316	0.1029	2.077e-09	-5.992	0.3704	0.3928	0.8534	0.6492	5.318e-06	0.008912	0.01244	0.09315	1.00136e-05	intronic	DAG1	.	.	.
7	rs7647973	3	49510931	G	A	0.2336	0.1006	6.863e-10	6.169	0.3535	0.3854	0.8595	0.6593	8.156e-06	0.008679	0.01445	0.09242	9.97424e-06	intronic	DAG1	.	.	.
7	rs7355800	3	49516519	C	T	0.2316	0.2829	3.212e-10	6.288	0.2659	0.6912	0.5675	0.11	6.987e-06	0.008581	0.01074	0.0962	1.11988e-05	intronic	DAG1	.	.	.
7	rs62261183	3	49522458	C	T	0.2316	0.2829	1.564e-09	6.038	0.2633	0.6921	0.5765	0.1088	7.509e-06	0.008614	0.01162	0.09627	9.32932e-06	intronic	DAG1	.	.	.
7	rs74471041	3	49542543	G	T	0.2316	0.2829	1.871e-10	-6.372	0.2311	0.6162	0.5674	0.109	1.472e-05	0.007238	0.009631	0.1002	9.41348e-06	intronic	DAG1	.	.	.
7	rs7644148	3	49545241	G	A	0.2316	0.2829	7.503e-10	6.155	0.2332	0.6859	0.5732	0.109	1.59e-05	0.008434	0.01011	0.09999	9.41348e-06	intronic	DAG1	.	.	.
7	rs9871024	3	49554241	C	T	0.2316	0.2829	3.96e-08	-5.493	0.2358	0.6672	0.5745	0.1201	0.01081	0.008673	0.008726	0.09883	9.39377e-06	intronic	DAG1	.	.	.
7	rs13322887	3	49555583	G	A	0.2316	0.2829	3.939e-08	5.494	0.2369	0.6791	0.5811	0.1201	0.01024	0.008786	0.008758	0.09769	9.39312e-06	intronic	DAG1	.	.	.
7	rs12583	3	49571462	G	T	0.2316	0.2829	4.001e-08	5.491	0.2151	0.682	0.5817	0.1204	0.1726	0.008952	0.008483	0.09461	9.56709e-06	UTR3	DAG1	ENST00000469139.2_6:c.*830G>T;ENST00000452317.6_12:c.*830G>T;ENST00000430636.2_6:c.*830G>T;ENST00000466701.2_5:c.*830G>T;ENST00000496474.2_5:c.*830G>T;ENST00000308775.7_5:c.*830G>T;ENST00000673708.1_2:c.*830G>T	.	.
7	rs4855838	3	49579876	G	A	0.2316	0.2837	3.745e-08	5.502	0.2126	0.6619	0.6485	0.119	0.01151	0.00995	0.008408	0.09135	9.28988e-06	intergenic	DAG1;BSN-DT	dist=6825;dist=6863	.	.
7	rs4855837	3	49582677	C	T	0.2316	0.2829	4.147e-08	5.484	0.2308	0.6772	0.6502	0.1184	0.01148	0.00967	0.009098	0.09041	9.28988e-06	intergenic	DAG1;BSN-DT	dist=9626;dist=4062	.	.
7	rs11130204	3	49584243	G	A	0.2326	0.2829	4.118e-08	5.486	0.1877	0.6613	0.6191	0.1201	0.1897	0.0101	0.008239	0.09285	9.28881e-06	intergenic	DAG1;BSN-DT	dist=11192;dist=2496	.	.
7	rs2312462	3	49601255	C	T	0.2316	0.2837	4.786e-08	5.459	0.1654	0.6763	0.8872	0.1127	0.181	0.00974	0.008262	0.08897	9.76922e-06	intronic	BSN	.	.	.
7	rs6797299	3	49609794	G	T	0.1481	0.2821	4.728e-08	-5.461	0.06309	0.9201	0.6358	0.1537	0.001006	0.1201	0.0006219	0.08348	0.000633826	intronic	BSN	.	.	.
7	rs11130207	3	49611666	G	T	0.1471	0.2821	1.143e-08	5.708	0.06076	0.9421	0.6178	0.1595	0.0009277	0.1404	0.000266	0.4438	0.000658522	intronic	BSN	.	.	.	y
7	rs11130208	3	49615624	G	T	0.1471	0.2821	4.174e-08	-5.483	0.05989	0.9444	0.6133	0.1606	0.0006269	0.1401	0.0005693	0.08451	0.000634205	intronic	BSN	.	.	.
7	rs6446284	3	49616997	G	A	0.1471	0.2821	4.367e-08	5.475	0.06079	0.9444	0.6133	0.161	0.0006966	0.1399	0.0005901	0.08522	0.000575785	intronic	BSN	.	.	.
7	rs9869120	3	49624065	C	T	0.1471	0.2821	2.935e-08	5.545	0.0508	0.8583	0.5744	0.1631	0.0007922	0.1499	0.0006214	0.08549	0.000612435	intronic	BSN	.	.	.
7	rs1491983	3	49639803	G	T	0.1461	0.3336	2.804e-08	-5.553	0.1539	0.5819	0.8269	0.6084	0.0005349	0.1466	0.0004035	0.08556	0.000501545	intronic	BSN	.	.	.
7	rs4241405	3	49642027	C	T	0.1461	0.2867	1.684e-08	-5.642	0.1028	0.7929	0.5445	0.1708	0.0004891	0.1478	0.0003288	0.08867	0.000501083	intronic	BSN	.	.	.
7	rs12637313	3	49645458	G	A	0.1461	0.2867	2.055e-08	5.607	0.1025	0.7093	0.5399	0.1718	0.0005746	0.1472	0.0003335	0.08927	0.00050158	intronic	BSN	.	.	.
7	rs11721148	3	49646669	G	A	0.1461	0.3298	3.443e-08	-5.517	0.2146	0.5873	0.8255	0.6324	0.0007004	0.1497	0.0003642	0.09026	0.000500207	intronic	BSN	.	.	.
7	rs2029591	3	49646981	C	T	0.1461	0.2867	2.164e-08	5.598	0.1042	0.7093	0.5401	0.1729	0.0006425	0.1481	0.0003207	0.08896	0.000500069	intronic	BSN	.	.	.
7	rs6446286	3	49681704	G	A	0.166	0.2905	2.4e-08	5.58	0.1311	0.7522	0.5549	0.1935	0.0009215	0.2441	0.0002546	0.145	0.000887401	intronic	BSN	.	.	.
8	rs1248850	3	84887559	C	T	0.496	0.6717	1.809e-08	5.629	0.8871	0.3502	0.694	0.8955	1.053e-05	0.005456	0.0481	0.1182	0.00075638	ncRNA_intronic	LINC00971	.	.	.
8	rs421983	3	84892866	C	T	0.494	0.5756	4.494e-09	5.865	0.9251	0.3227	0.5609	0.4257	7.375e-06	0.005249	0.04475	0.08893	0.000786285	ncRNA_intronic	LINC00971	.	.	.
8	rs1694933	3	84951716	C	A	0.4901	0.6664	2.021e-09	-5.996	0.297	0.7844	0.06711	0.1348	7.01e-06	0.004629	0.04783	0.1166	0.000912389	intergenic	LINC02025;AC132660.1	dist=9189;dist=3114	.	.	y
9	rs6824152	4	46915161	C	T	0.4642	0.5363	4.112e-08	-5.486	0.2839	0.5392	0.04891	0.06694	2.793e-07	0.00685	0.8178	0.3267	0.000710003	intergenic	COX7B2;GABRA4	dist=3899;dist=5756	.	.	y
10	rs71627581	5	43161351	G	A	0.1193	0.003	2.231e-11	-6.69	0.1182	0.432	0.5676	0.2056	2.987e-06	0.5127	0.02414	5.031e-05	0.000958429	exonic	ZNF131	.	synonymous SNV	ZNF131:ENST00000509634.5_3:exon4:c.G372A:p.R124R,ZNF131:ENST00000306938.8_3:exon5:c.G372A:p.R124R,ZNF131:ENST00000505606.6_3:exon5:c.G372A:p.R124R,ZNF131:ENST00000509156.5_3:exon5:c.G372A:p.R124R,ZNF131:ENST00000682664.1_1:exon5:c.G372A:p.R124R	y
11	rs6929812	6	27384520	C	T	0.4274	0.6044	3.207e-08	-5.53	0.1099	0.7277	0.6793	0.9551	0.01145	1.405e-06	0.01189	0.2583	0.011386	intergenic	ENSG00000271755;ZNF184	dist=9777;dist=34002	.	.	y
12	rs17685	7	75616105	G	A	0.2893	0.1702	1.784e-08	-5.632	0.5241	0.6923	0.8889	0.5769	2.896e-06	5.712e-05	0.00873	0.03732	0.427716	UTR3	POR	ENST00000706544.1_1:c.*306G>A;ENST00000461988.6_5:c.*306G>A;ENST00000706545.1_1:c.*306G>A;ENST00000706546.1_1:c.*306G>A;ENST00000706547.1_1:c.*306G>A;ENST00000394893.5_2:c.*542G>A;ENST00000475509.2_2:c.*306G>A;ENST00000439269.1_1:c.*306G>A	.	.	y
13	rs7779476	7	114023285	C	A	0.4423	0.8782	2.353e-08	-5.584	0.5611	0.1946	0.9918	0.8933	0.02403	0.138	4.039e-05	0.05618	0.000120254	intronic	FOXP2	.	.	.	y
13	rs2189012	7	114211912	G	A	0.3757	0.1278	9.974e-09	5.731	0.4672	0.7354	0.05109	0.9758	0.07483	0.9654	2.099e-06	0.005825	0.0268269	intronic	FOXP2	.	.	.	y
14	rs4444109	11	112854309	G	T	0.2962	0.1936	6.622e-10	6.175	0.03748	0.08611	0.1965	0.227	2.942e-05	1.177e-05	0.0573	0.03443	0.129707	intronic	NCAM1	.	.	.	y
14	rs12577005	11	112923802	C	A	0.4622	0.2027	3.031e-08	5.54	0.4059	0.1917	0.855	0.571	2.738e-05	0.0001628	0.1506	0.02513	0.0897202	intronic	NCAM1	.	.	.	y
14	rs12360992	11	113262900	C	A	0.4682	0.9592	4.782e-13	7.231	0.002608	0.974	0.2242	0.8132	0.001581	0.0001799	0.03997	0.006436	6.77174e-07	intronic	ANKK1	.	.	.
14	rs35023999	11	113266411	C	A	0.496	0.9607	4.366e-13	7.244	0.003102	0.7244	0.3235	0.7003	3.191e-06	0.0004972	0.00845	0.01786	4.03962e-07	intronic	ANKK1	.	.	.
14	rs10891547	11	113267218	C	A	0.499	0.9607	3.377e-13	-7.278	0.003502	0.6971	0.3431	0.7267	4.899e-06	0.0003761	0.01108	0.01706	3.8249e-07	intronic	ANKK1	.	.	.
14	rs10891548	11	113267259	G	A	0.499	0.9607	4.013e-13	-7.255	0.00363	0.7478	0.343	0.7271	5.045e-06	0.0003783	0.01109	0.01768	3.8249e-07	intronic	ANKK1	.	.	.
14	rs11604671	11	113268059	G	A	0.499	0.9607	2.532e-13	-7.317	0.004006	0.8925	0.3603	0.7346	7.135e-06	0.0004168	0.00984	0.01447	3.7436e-07	exonic	ANKK1	.	nonsynonymous SNV	ANKK1:ENST00000303941.4_3:exon6:c.G952A:p.G318R
14	rs2734849	11	113270160	G	A	0.496	0.8956	2.137e-13	7.34	0.01411	0.5434	0.4188	0.2338	7.035e-06	0.0003804	0.007148	0.03549	3.596e-07	exonic	ANKK1	.	synonymous SNV	ANKK1:ENST00000303941.4_3:exon8:c.A1469A:p.H490H
14	rs12363125	11	113285916	C	T	0.3877	0.9062	1.04e-14	-7.734	0.003182	0.9096	0.06479	0.3548	1.904e-07	3.003e-05	0.01146	0.004523	1.86496e-07	intronic	DRD2	.	.	.
14	rs2734839	11	113286490	C	T	0.3867	0.6657	3.59e-15	-7.868	0.03921	0.5558	0.3373	0.7168	3.175e-07	3.9e-05	0.01034	0.004776	1.69664e-07	intronic	DRD2	.	.	.
14	rs2734838	11	113286501	G	A	0.3877	0.8525	1.764e-16	8.237	0.001376	0.4645	0.09618	0.3379	1.927e-07	2.789e-05	0.01266	0.004574	1.69422e-07	intronic	DRD2	.	.	.
14	rs2734837	11	113286829	C	T	0.3867	0.6657	4.335e-15	-7.845	0.04639	0.5358	0.3961	0.7098	3.064e-07	3.888e-05	0.01046	0.005314	1.69652e-07	intronic	DRD2	.	.	.
14	rs1107162	11	113289037	G	A	0.3877	0.8502	3.297e-16	-8.162	0.00108	0.4411	0.06446	0.3598	2.348e-07	2.82e-05	0.01376	0.005049	1.69602e-07	intronic	DRD2	.	.	.
14	rs2734835	11	113291343	G	T	0.3867	0.9107	2.073e-15	7.937	0.003752	0.8653	0.1053	0.3301	4.099e-07	3.985e-05	0.01267	0.004631	1.33829e-07	intronic	DRD2	.	.	.
14	rs1800498	11	113291588	G	A	0.3867	0.8525	7.334e-16	-8.065	0.000774	0.4519	0.07331	0.379	4.245e-07	3.058e-05	0.01354	0.005134	1.01018e-07	intronic	DRD2	.	.	.
14	rs2734833	11	113292920	G	A	0.3867	0.7708	2.966e-14	-7.6	0.1578	0.4123	0.2131	0.6988	5.375e-07	3.1e-05	0.01216	0.003758	2.30861e-07	intronic	DRD2	.	.	.
14	rs2734832	11	113293501	G	A	0.3867	0.9002	3.823e-16	8.144	0.0007693	0.6726	0.06505	0.3498	3.733e-07	3.465e-05	0.01187	0.003796	1.02419e-07	intronic	DRD2	.	.	.
14	rs2734831	11	113293596	G	T	0.3867	0.8979	3.24e-16	8.164	0.0004844	0.6914	0.05368	0.3085	3.804e-07	3.466e-05	0.01241	0.003779	1.02407e-07	intronic	DRD2	.	.	.
14	rs11608185	11	113294976	C	T	0.3877	0.8427	6.139e-16	8.087	0.01611	0.3076	0.04623	0.274	4.712e-07	2.962e-05	0.01298	0.004506	9.84283e-08	intronic	DRD2	.	.	.
14	rs1076563	11	113295909	C	A	0.3877	0.8449	3.822e-16	8.144	0.0001755	0.3282	0.04223	0.2907	4.275e-07	3.468e-05	0.01282	0.006769	1.31883e-07	intronic	DRD2	.	.	.
14	rs1116313	11	113296107	G	A	0.3877	0.8434	1.044e-16	8.3	0.0001663	0.2766	0.0469	0.2668	4.699e-07	3.407e-05	0.01242	0.004721	1.30608e-07	intronic	DRD2	.	.	.	y
14	rs12798900	11	113298996	G	T	0.3946	0.9145	2.451e-15	-7.916	0.002388	0.8085	0.09864	0.3674	2.864e-07	5.281e-05	0.02075	0.002446	8.4155e-07	intronic	DRD2	.	.	.
14	rs7131627	11	113299829	G	A	0.3946	0.8449	1.012e-15	-8.025	0.0008951	0.5194	0.2801	0.4552	4.18e-07	7.058e-05	0.02219	0.002536	8.61271e-07	intronic	DRD2	.	.	.
14	rs7131440	11	113299910	C	T	0.3946	0.8449	9.386e-16	-8.035	0.0009254	0.519	0.2787	0.4516	4.27e-07	7.071e-05	0.02199	0.002314	8.6149e-07	intronic	DRD2	.	.	.
14	rs7131465	11	113300022	C	A	0.3946	0.8449	1.123e-15	8.013	0.0008918	0.5154	0.2914	0.4493	3.905e-07	6.922e-05	0.02309	0.002509	8.63615e-07	intronic	DRD2	.	.	.
14	rs7131681	11	113300052	C	T	0.3946	0.8442	1.03e-15	-8.023	0.000855	0.5164	0.3004	0.4437	4.028e-07	7.278e-05	0.02189	0.002342	8.61549e-07	intronic	DRD2	.	.	.
14	rs11214605	11	113300601	C	T	0.3946	0.9145	1.848e-14	-7.661	0.003166	0.8577	0.0767	0.3677	3.461e-07	5.752e-05	0.02454	0.002371	8.61331e-07	intronic	DRD2	.	.	.
14	rs12800853	11	113302514	C	T	0.3946	0.9312	4.045e-14	-7.56	0.008475	0.8406	0.08265	0.2361	1.73e-07	8.588e-05	0.01688	0.002216	7.21373e-07	intronic	DRD2	.	.	.
14	rs7122246	11	113304457	G	A	0.3867	0.9304	1.373e-14	-7.699	0.01041	0.9185	0.09943	0.221	1.344e-06	0.0001262	0.01424	0.004635	1.23883e-07	intronic	DRD2	.	.	.
14	rs12364051	11	113305314	G	A	0.3847	0.8283	3.341e-15	7.877	0.001157	0.4607	0.4958	0.4883	1.004e-06	0.0001032	0.01478	0.004301	1.27295e-07	intronic	DRD2	.	.	.
14	rs7934649	11	113372671	C	T	0.3588	0.1596	6.278e-13	7.194	0.06822	0.9202	0.349	0.7182	1.189e-12	0.006873	0.1797	2.877e-05	0.00531312	intergenic	DRD2;TMPRSS5	dist=26551;dist=185598	.	.	y
14	rs6589379	11	113374567	G	T	0.3588	0.1596	2.155e-12	7.024	0.08543	0.915	0.3488	0.7116	1.008e-12	0.006844	0.1733	2.689e-05	0.00532476	intergenic	DRD2;TMPRSS5	dist=28447;dist=183702	.	.
14	rs17532157	11	113516770	G	T	0.1004	0.0076	3.409e-08	5.519	0.1216	0.1804	0.5255	0.3942	1.525e-05	0.002251	0.02145	0.4124	0.00182873	intergenic	DRD2;TMPRSS5	dist=170650;dist=41499	.	.
14	rs17532479	11	113522981	C	T	0.1014	0.0076	1.105e-08	-5.714	0.1289	0.171	0.4817	0.4365	1.517e-05	0.002271	0.02954	0.3542	0.00175788	intergenic	DRD2;TMPRSS5	dist=176861;dist=35288	.	.
14	rs111614192	11	113525585	G	A	0.1034	0.0477	6.443e-09	5.805	0.8138	0.1879	0.6568	0.06901	1.241e-05	0.002301	0.02977	0.401	0.00171431	intergenic	DRD2;TMPRSS5	dist=179465;dist=32684	.	.	y
14	rs17611093	11	113548309	C	T	0.1014	0.0076	9.162e-09	-5.746	0.09073	0.171	0.5449	0.4365	1.675e-05	0.002032	0.02641	0.4346	0.0014973	intergenic	DRD2;TMPRSS5	dist=202189;dist=9960	.	.
14	rs11604887	11	113602809	C	T	0.08847	0.0061	4.704e-08	-5.462	0.151	0.1198	0.5627	0.3731	0.0001934	0.00413	0.01857	0.5333	0.000780962	intergenic	TMPRSS5;ZW10	dist=25714;dist=1100	.	.
15	rs4245042	11	121517510	C	T	0.4344	0.0499	4.48e-08	5.471	0.434	0.3821	0.1805	0.04159	4.93e-06	0.02624	0.005981	0.135	0.0438662	intergenic	SORL1;ENSG00000286044	dist=13038;dist=27459	.	.	y
16	rs12888002	14	104238647	C	T	0.3042	0.0219	5.823e-11	-6.548	0.9855	0.2961	0.8782	0.1311	0.0001115	0.285	0.07012	5.607e-07	4.42059e-05	intronic	PPP1R13B	.	.	.
16	rs12893623	14	104290813	G	A	0.3042	0.1407	2.442e-15	-7.917	0.9209	0.09727	0.2881	0.9549	2.048e-08	0.03561	0.09081	2.8e-07	3.7228e-05	intronic	PPP1R13B	.	.	.	y
16	rs12588797	14	104300020	C	T	0.3042	0.1392	5.288e-14	-7.525	0.1893	0.09314	0.414	0.9907	3.235e-08	0.03378	0.06289	1.998e-07	3.25694e-05	intronic	PPP1R13B	.	.	.
16	rs8017200	14	104302883	G	A	0.3032	0.1384	5.61e-10	6.201	0.2551	0.08657	0.4786	0.8841	1.05e-07	0.03508	0.07775	0.001079	3.43273e-05	intronic	PPP1R13B	.	.	.
16	rs12879529	14	104307554	G	A	0.3052	0.1362	7.75e-14	7.474	0.1692	0.08321	0.3833	0.9645	4.093e-08	0.03135	0.05375	2.652e-07	3.43503e-05	intronic	PPP1R13B	.	.	.
16	rs1187417	14	104310025	C	T	0.3042	0.1399	2.793e-15	7.9	0.1012	0.08643	0.3946	0.9615	3.428e-08	0.03215	0.05774	7.769e-07	3.25807e-05	intronic	PPP1R13B	.	.	.
16	rs4906379	14	104315491	G	A	0.3042	0.1362	6.034e-15	7.803	0.1488	0.8848	0.4059	0.936	3.482e-08	0.2281	0.0446	1.27e-07	3.30864e-05	ncRNA_intronic	PPP1R13B-DT	.	.	.
16	rs6576006	14	104322394	C	A	0.3022	0.1362	8.896e-15	7.754	0.1353	0.08247	0.5242	0.9044	4.72e-08	0.03558	0.04252	1.462e-07	3.40879e-05	ncRNA_intronic	ENSG00000258534;PPP1R13B-DT	.	.	.
16	rs6576007	14	104323777	G	T	0.3022	0.1384	6.907e-14	-7.49	0.1364	0.9624	0.5372	0.9212	5.199e-08	0.2398	0.06509	1.977e-06	3.41798e-05	ncRNA_exonic	PPP1R13B-DT	.	.	.
16	rs10438244	14	104346185	C	T	0.3907	0.0809	4.746e-10	6.227	0.8785	0.3984	0.417	0.2881	1.732e-08	0.2198	0.05964	0.0002311	0.000792173	ncRNA_exonic	ENSG00000287346	.	.	.
16	rs6576010	14	104349602	G	A	0.3956	0.2239	5.242e-11	6.564	0.08491	0.0851	0.6109	0.8518	1.96e-08	0.2171	0.07135	9.731e-05	0.000782618	intergenic	ENSG00000287346;ATP5MJ	dist=2884;dist=29023	.	.
16	rs881056	14	104354225	G	A	0.3917	0.0726	9.743e-11	-6.471	0.8594	0.62	0.4944	0.3187	4.684e-09	0.1606	0.06583	0.0001149	0.00154764	intergenic	ENSG00000287346;ATP5MJ	dist=7507;dist=24400	.	.
16	rs881057	14	104354258	G	T	0.3917	0.0719	1.016e-10	6.465	0.8442	0.6063	0.4948	0.3188	5.283e-09	0.1632	0.06576	0.0001184	0.00155039	intergenic	ENSG00000287346;ATP5MJ	dist=7540;dist=24367	.	.
16	rs761985	14	104355252	G	T	0.3917	0.0726	1.008e-10	-6.466	0.8369	0.571	0.461	0.3276	3.535e-09	0.1588	0.06323	0.0001091	0.0019143	intergenic	ENSG00000287346;ATP5MJ	dist=8534;dist=23373	.	.
16	rs2019064	14	104355391	C	A	0.3867	0.0499	1.508e-09	6.043	0.9611	0.1606	0.887	0.2694	6.528e-09	0.179	0.06045	0.0001102	0.00159423	intergenic	ENSG00000287346;ATP5MJ	dist=8673;dist=23234	.	.
16	rs4900601	14	104358076	C	T	0.3817	0.1604	1.845e-11	6.718	0.5475	0.01562	0.3349	0.3299	1.372e-07	0.1049	0.0801	9.548e-05	0.000339938	intergenic	ENSG00000287346;ATP5MJ	dist=11358;dist=20549	.	.	y
16	rs35924317	14	104359696	C	T	0.3817	0.0492	5.578e-11	6.555	0.9988	0.1378	0.6912	0.176	7.086e-08	0.1352	0.06669	9.087e-05	0.000353273	intergenic	ENSG00000287346;ATP5MJ	dist=12978;dist=18929	.	.
17	rs1486898	15	47642503	C	T	0.1551	0.3336	1.869e-08	5.624	0.6515	0.3794	0.5731	0.2218	1.536e-05	0.09776	0.005186	0.01189	0.00375249	intronic	SEMA6D	.	.	.
17	rs1486900	15	47642886	G	T	0.1551	0.3343	7.112e-09	5.788	0.6259	0.3687	0.5305	0.2051	1.257e-05	0.1015	0.005559	0.01265	0.00375267	intronic	SEMA6D	.	.	.
17	rs1486901	15	47642993	G	A	0.3489	0.9289	1.853e-10	6.373	0.3731	0.7245	0.001221	0.5993	4.907e-06	0.2827	0.02523	0.0001098	2.36499e-07	intronic	SEMA6D	.	.	.
17	rs531595	15	47643253	G	A	0.3638	0.9297	8.309e-12	6.833	0.5701	0.6365	0.001788	0.5853	1.034e-05	0.2495	0.005927	2.012e-05	1.72477e-07	intronic	SEMA6D	.	.	.
17	rs557899	15	47643795	C	A	0.3489	0.9289	6.678e-11	6.528	0.382	0.7261	0.001221	0.5375	5.824e-06	0.2818	0.02635	0.000116	2.37285e-07	intronic	SEMA6D	.	.	.
17	rs653298	15	47644409	G	T	0.3638	0.9297	1.394e-12	7.085	0.5521	0.6373	0.001788	0.5854	9.469e-06	0.2528	0.005736	1.979e-05	1.51558e-07	intronic	SEMA6D	.	.	.
17	rs653749	15	47644528	G	A	0.3638	0.9289	1.722e-12	-7.055	0.5885	0.64	0.001814	0.5659	1.172e-05	0.2525	0.005944	1.99e-05	1.72651e-07	intronic	SEMA6D	.	.	.
17	rs665751	15	47644963	C	T	0.3628	0.9297	7.525e-13	7.17	0.5742	0.6601	0.002162	0.5862	1.153e-05	0.5752	0.005153	2.068e-05	1.72651e-07	intronic	SEMA6D	.	.	.
17	rs1496919	15	47645491	G	A	0.3638	0.9289	2.157e-13	-7.339	0.6198	0.6646	0.001895	0.5852	1.102e-05	0.2853	0.005245	1.983e-05	1.72223e-07	intronic	SEMA6D	.	.	.
17	rs16959322	15	47645660	C	A	0.1551	0.3328	1.304e-08	5.686	0.6554	0.3727	0.5237	0.2033	1.031e-05	0.12	0.005137	0.01269	0.00375223	intronic	SEMA6D	.	.	.
17	rs1390876	15	47645789	G	A	0.3638	0.9289	1.858e-13	7.359	0.6215	0.6572	0.001803	0.5842	1.171e-05	0.5602	0.006076	2.012e-05	1.72631e-07	intronic	SEMA6D	.	.	.
17	rs1390877	15	47645892	C	T	0.3489	0.9281	2.5e-11	6.673	0.415	0.7428	0.001232	0.5973	5.033e-06	0.3155	0.02348	0.000108	2.38046e-07	intronic	SEMA6D	.	.	.
17	rs955686	15	47645956	C	T	0.3638	0.9289	1.471e-13	7.39	0.63	0.6572	0.001888	0.5833	1.089e-05	0.5602	0.005064	2.01e-05	1.72445e-07	intronic	SEMA6D	.	.	.
17	rs955685	15	47646032	G	A	0.3638	0.9289	1.271e-13	-7.409	0.6098	0.6571	0.001889	0.5828	1.145e-05	0.5611	0.004816	2.063e-05	1.7185e-07	intronic	SEMA6D	.	.	.
17	rs590247	15	47647560	C	T	0.3559	0.9281	2.16e-11	-6.695	0.3735	0.8854	0.0008478	0.6809	2.508e-05	0.286	0.02144	9.487e-05	2.80098e-07	intronic	SEMA6D	.	.	.
17	rs591143	15	47647755	C	T	0.3708	0.9289	9.131e-11	-6.481	0.5721	0.803	0.002844	0.6493	0.05382	0.715	0.004934	1.591e-05	2.02442e-07	intronic	SEMA6D	.	.	.
17	rs281274	15	47659445	C	T	0.3628	0.944	7.812e-13	-7.164	0.09208	0.5783	0.006012	0.6419	1.472e-05	0.2659	0.0323	1.794e-05	3.10899e-08	ncRNA_intronic	ENSG00000259221	.	.	.
17	rs281280	15	47661369	G	A	0.3618	0.9448	1.021e-12	-7.128	0.0733	0.559	0.005274	0.7004	8.882e-06	0.267	0.02896	2.074e-05	3.10899e-08	ncRNA_intronic	ENSG00000259221	.	.	.
17	rs281258	15	47672201	C	T	0.3638	0.941	2.627e-13	-7.312	0.03801	0.3674	0.005507	0.5828	7.53e-06	0.2966	0.01992	2.529e-05	3.07971e-08	ncRNA_intronic	ENSG00000259221	.	.	.
17	rs281259	15	47672312	C	T	0.3638	0.941	5.449e-14	-7.521	0.03796	0.3674	0.005509	0.5825	6.854e-06	0.2963	0.0204	1.606e-05	3.06577e-08	ncRNA_intronic	ENSG00000259221	.	.	.
17	rs281260	15	47673928	C	T	0.3638	0.941	6.253e-14	-7.503	0.03698	0.3629	0.005339	0.6179	4.895e-06	0.2984	0.02078	2.893e-05	2.64911e-08	ncRNA_intronic	ENSG00000259221	.	.	.
17	rs175979	15	47674812	G	A	0.3638	0.941	1.581e-14	7.681	0.03483	0.3714	0.004581	0.6565	2.17e-06	0.29	0.01988	1.895e-05	1.97843e-08	ncRNA_intronic	ENSG00000259221	.	.	.	y
17	rs281264	15	47675569	G	A	0.3439	0.9327	1.224e-12	-7.103	0.05309	0.2324	0.03288	0.8146	1.223e-05	0.2842	0.01041	7.196e-05	1.95862e-08	ncRNA_intronic	ENSG00000259221	.	.	.
17	rs35534970	15	47675585	G	A	0.2068	0.2632	1.645e-11	6.735	0.5163	0.7608	0.7451	0.6287	4.133e-06	0.2189	0.01417	0.0004638	1.69212e-08	ncRNA_intronic	ENSG00000259221	.	.	.
17	rs281265	15	47675602	C	A	0.3439	0.9327	2.709e-14	-7.612	0.05548	0.2325	0.0329	0.8145	1.262e-05	0.2844	0.01044	9.012e-05	1.95686e-08	ncRNA_intronic	ENSG00000259221	.	.	.
17	rs12910916	15	47675655	C	T	0.2068	0.2632	7.79e-11	6.505	0.518	0.766	0.7455	0.6278	4.765e-06	0.2173	0.01436	0.0004576	1.05363e-08	ncRNA_intronic	ENSG00000259221	.	.	.
17	rs7174904	15	47676110	C	T	0.2068	0.264	6.14e-11	6.54	0.5376	0.7852	0.7725	0.636	4.419e-06	0.2211	0.01311	0.0004486	1.89544e-08	ncRNA_intronic	ENSG00000259221	.	.	.
17	rs7175414	15	47676200	G	A	0.2068	0.264	7.015e-11	6.52	0.5385	0.7858	0.8185	0.635	4.596e-06	0.2195	0.01288	0.0005339	1.89535e-08	ncRNA_intronic	ENSG00000259221	.	.	.
17	rs7174964	15	47676228	C	A	0.2068	0.264	6.166e-11	-6.54	0.5385	0.7858	0.8185	0.6346	4.532e-06	0.2195	0.01293	0.000466	1.72179e-08	ncRNA_intronic	ENSG00000259221	.	.	.
17	rs6493274	15	47676489	C	A	0.2068	0.264	1.793e-11	-6.722	0.5442	0.7844	0.8266	0.636	4.368e-06	0.2194	0.01277	0.0004404	1.90029e-08	ncRNA_intronic	ENSG00000259221	.	.	.
17	rs8040191	15	47676716	C	T	0.2068	0.2648	4.773e-11	6.578	0.5423	0.7842	0.8899	0.6092	5.388e-06	0.2188	0.01395	0.0004591	2.11252e-08	ncRNA_intronic	ENSG00000259221	.	.	.
17	rs8040226	15	47676830	G	A	0.2068	0.2648	4.527e-11	-6.586	0.5753	0.7611	0.8652	0.6176	5.632e-06	0.2196	0.01358	0.0005899	1.91113e-08	ncRNA_intronic	ENSG00000259221	.	.	.
17	rs8041603	15	47676855	C	T	0.2068	0.264	2.599e-11	-6.668	0.5722	0.7722	0.8203	0.6191	5.547e-06	0.2202	0.01301	0.0005952	1.91113e-08	ncRNA_intronic	ENSG00000259221	.	.	.
17	rs2433018	15	47677596	G	A	0.3111	0.9054	2.905e-10	-6.304	0.8257	0.9047	0.1773	0.5898	0.0001201	0.2801	0.05049	0.0001802	9.35233e-09	ncRNA_intronic	ENSG00000259221	.	.	.
17	rs7166534	15	47678132	C	T	0.2068	0.264	6.555e-11	-6.53	0.6067	0.7841	0.8008	0.6264	5.873e-06	0.2186	0.01247	0.0005664	1.91113e-08	ncRNA_intronic	ENSG00000259221	.	.	.
17	rs4485292	15	47678898	G	A	0.2068	0.264	7.657e-11	6.507	0.6694	0.7826	0.7967	0.6455	6.274e-06	0.2252	0.01274	0.0006589	1.91113e-08	ncRNA_intronic	ENSG00000259221	.	.	.
17	rs12904595	15	47679524	C	T	0.2068	0.264	7.958e-11	-6.501	0.5679	0.8139	0.7986	0.666	2.525e-06	0.233	0.01291	0.0006269	1.91113e-08	ncRNA_intronic	ENSG00000259221	.	.	.
17	rs2132661	15	47679726	G	A	0.2068	0.264	9.059e-11	-6.482	0.5654	0.7678	0.7978	0.674	2.198e-06	0.2329	0.0129	0.0006273	1.91113e-08	ncRNA_intronic	ENSG00000259221	.	.	.
17	rs2132660	15	47679807	G	A	0.2068	0.264	8.963e-11	-6.483	0.5755	0.7564	0.7978	0.6684	2.222e-06	0.2315	0.0129	0.0006279	1.91113e-08	ncRNA_intronic	ENSG00000259221	.	.	.
17	rs8032333	15	47680567	G	A	0.2068	0.264	2.533e-11	-6.671	0.4706	0.7857	0.8135	0.6698	2.852e-06	0.2127	0.013	0.0005789	1.90673e-08	ncRNA_intronic	ENSG00000259221	.	.	.
17	rs35473814	15	47680662	G	A	0.2068	0.264	2.218e-11	6.691	0.4366	0.7412	0.8148	0.6695	2.92e-06	0.2643	0.01297	0.000581	1.90042e-08	ncRNA_intronic	ENSG00000259221	.	.	.
17	rs34794623	15	47680801	C	A	0.2068	0.264	2.32e-11	6.684	0.4635	0.7422	0.8092	0.6689	2.919e-06	0.2643	0.01291	0.0005822	1.8978e-08	ncRNA_intronic	ENSG00000259221	.	.	.
17	rs35175834	15	47680815	G	A	0.2068	0.264	1.632e-11	6.736	0.4568	0.742	0.8095	0.6692	2.913e-06	0.2643	0.0129	0.0005372	1.89644e-08	ncRNA_intronic	ENSG00000259221	.	.	.	y
17	rs281286	15	47681250	C	T	0.3479	0.9153	7.125e-12	-6.855	0.1288	0.1132	0.005557	0.5152	1.321e-05	0.2954	0.01581	4.249e-05	1.76104e-07	ncRNA_intronic	ENSG00000259221	.	.	.
17	rs281287	15	47681552	G	A	0.3559	0.9327	1.37e-12	-7.087	0.06296	0.1461	0.0202	0.8128	6.294e-06	0.2848	0.009344	4.411e-05	8.69581e-08	ncRNA_intronic	ENSG00000259221	.	.	.
17	rs281289	15	47682079	G	A	0.3479	0.9289	1.098e-12	-7.118	0.09829	0.1408	0.02437	0.6585	1.447e-05	0.2985	0.01455	5.52e-05	1.75906e-07	ncRNA_intronic	ENSG00000259221	.	.	.
17	rs281291	15	47682428	G	A	0.3479	0.9289	1.29e-12	-7.095	0.09828	0.1558	0.02437	0.6046	1.508e-05	0.309	0.0146	5.804e-05	1.758e-07	ncRNA_intronic	ENSG00000259221	.	.	.
17	rs281293	15	47683333	G	A	0.3489	0.9289	1.519e-11	6.746	0.1034	0.1542	0.02624	0.7005	1.211e-05	0.3056	0.01807	5.626e-05	1.71333e-07	ncRNA_intronic	ENSG00000259221	.	.	.
17	rs34488670	15	47684936	C	T	0.2068	0.2587	5.306e-11	-6.562	0.9919	0.7165	0.7444	0.6342	2.648e-06	0.2327	0.01041	0.001157	1.73524e-08	ncRNA_intronic	ENSG00000259221	.	.	.
17	rs281296	15	47685010	G	A	0.3559	0.9327	6.284e-13	7.194	0.06134	0.152	0.02235	0.8277	3.649e-06	0.2863	0.009217	4.669e-05	7.72129e-08	ncRNA_intronic	ENSG00000259221	.	.	.
18	rs77354823	18	26578748	C	T	0.2942	0.1263	3.3e-08	-5.525	0.2074	0.43	0.9842	0.6802	0.06871	0.2219	0.03243	2.392e-06	0.00103949	intergenic	ENSG00000265994;RNU6-408P	dist=209204;dist=49836	.	.	y
19	rs2613765	19	5066330	G	A	0.4483	0.2436	1.166e-08	-5.705	0.02506	0.1694	0.578	0.4062	4.551e-06	0.6543	0.001733	0.06535	0.0371809	intronic	KDM4B	.	.	.	y
20	rs62128800	19	10667750	C	T	0.499	0.7526	7.636e-09	5.776	0.0005613	0.169	0.4112	0.209	0.003369	0.3145	0.07902	0.0001639	0.000490817	intronic	KRI1	.	.	.	y
20	rs2002538	19	10669824	G	A	0.5	0.1785	2.916e-08	-5.546	0.001112	0.4542	0.8863	0.3206	0.003675	0.3366	0.09089	0.0001103	0.000414085	intronic	KRI1	.	.	.
20	rs3745250	19	10670794	G	A	0.5	0.1778	1.837e-08	-5.627	0.001449	0.4412	0.8734	0.304	0.003958	0.3447	0.08059	0.0001041	0.000379324	intronic	KRI1	.	.	.

## Sheet: S6.EA.LA.sig.SNPs
Locus	rsID	chr	pos	non_Effect_Allele	Effect_Allele	1KGEUR.MAF	1KG.AMR.MAF	Meta.P	Meta.beta	EA.AUD.P	EA.OUD.P	EA.CUD.P	EA.TUD.P	Finngen.SUD.P	HIS.AUD.P	HIS.OUD.P	Func.ensGene	Gene.ensGene	GeneDetail.ensGene	ExonicFunc.ensGene	AAChange.ensGene	Independent
1	rs4233254	1	29168054	C	T	0.2932	0.3545	2.661e-08	5.562	0.01066	0.008249	0.01034	0.0841	5.2453e-06	0.4692	0.983572	intronic	OPRD1	.	.	.	y
1	rs4654323	1	29168957	G	T	0.2932	0.3545	4.356e-08	5.476	0.01298	0.006388	0.01408	0.08802	4.89384e-06	0.4369	0.977578	intronic	OPRD1	.	.	.
2	rs6588169	1	66335318	C	T	0.1759	0.0821	6.647e-09	5.8	0.0003328	0.01147	0.003532	0.06044	0.00153169	0.3398	0.270403	intronic	PDE4B	.	.	.	y
2	rs12759822	1	66341355	G	A	0.1819	0.1484	3.835e-08	5.498	0.001687	0.01328	0.01008	0.004145	0.00312536	0.3167	0.43908	intronic	PDE4B	.	.	.
2	rs4071565	1	66349959	C	T	0.1819	0.1455	3.503e-08	-5.514	0.0004078	0.01758	0.002949	0.05847	0.00315341	0.5066	0.391389	intronic	PDE4B	.	.	.
2	rs28842268	1	66398861	G	A	0.2435	0.1326	6.812e-09	-5.795	0.07433	0.003614	8.561e-05	0.004082	0.000751484	0.2339	0.465092	intronic	PDE4B	.	.	.
2	rs7550837	1	66407396	G	A	0.2624	0.1888	7.482e-12	6.848	3.828e-08	0.01172	0.000504	0.008994	0.00179875	0.2968	0.121016	intronic	PDE4B	.	.	.
2	rs12088813	1	66407700	C	A	0.2624	0.1888	5.32e-12	6.897	4.577e-08	0.01155	0.0004868	0.007873	0.00124386	0.2968	0.119417	intronic	PDE4B	.	.	.
2	rs4255359	1	66408019	G	A	0.2435	0.1326	4.236e-13	-7.248	1.925e-07	0.008236	0.0001422	0.003276	0.00070089	0.1401	0.465297	intronic	PDE4B	.	.	.
2	rs12730848	1	66408646	C	T	0.2634	0.1888	2.335e-12	-7.013	3.175e-08	0.01188	0.0004603	0.009309	0.00157645	0.2913	0.114727	intronic	PDE4B	.	.	.
2	rs17417915	1	66421606	C	A	0.2893	0.3285	3.489e-12	6.956	9.104e-09	0.02228	0.003577	0.02892	0.000210722	0.8967	0.00863049	intronic	PDE4B	.	.	.
2	rs61799396	1	66422444	C	T	0.2475	0.1326	3.223e-13	-7.285	1.396e-07	0.006179	0.0001578	0.00854	0.000723136	0.1066	0.478337	intronic	PDE4B	.	.	.	y
2	rs78353223	1	66422459	C	A	0.2475	0.1326	3.397e-13	-7.278	1.509e-07	0.00627	0.0001537	0.008603	0.000724369	0.1106	0.47761	intronic	PDE4B	.	.	.
2	rs35698460	1	66424749	C	T	0.2475	0.1326	2.355e-12	7.012	1.011e-07	0.006276	0.0001776	0.007272	0.00072242	0.115	0.460114	intronic	PDE4B	.	.	.
2	rs7551853	1	66425253	C	A	0.2475	0.1326	2.404e-12	-7.009	1.079e-07	0.00625	0.0001724	0.007441	0.000722171	0.113	0.460114	intronic	PDE4B	.	.	.
2	rs10789205	1	66426100	C	T	0.3569	0.3948	9.448e-10	-6.118	2.705e-06	0.106	0.0005433	0.06701	8.16206e-05	0.9258	0.106018	intronic	PDE4B	.	.	.
2	rs12760902	1	66426251	C	T	0.2893	0.33	4.285e-12	-6.927	1.042e-08	0.02257	0.004008	0.03128	0.000210547	0.846	0.00791724	intronic	PDE4B	.	.	.
2	rs4638095	1	66426350	G	A	0.3569	0.3948	1.108e-09	-6.093	2.749e-06	0.1218	0.0004996	0.07036	8.33144e-05	0.9258	0.101482	intronic	PDE4B	.	.	.
2	rs12743648	1	66428502	G	T	0.2475	0.1326	3.95e-13	-7.257	5.892e-08	0.006157	0.0001881	0.007662	0.000723769	0.1164	0.460114	intronic	PDE4B	.	.	.
2	rs12062815	1	66428569	G	A	0.3559	0.3919	1.213e-10	6.438	1.72e-06	0.09565	0.0005215	0.06338	8.33336e-05	0.9684	0.103587	intronic	PDE4B	.	.	.
2	rs7513141	1	66432913	G	A	0.3579	0.3948	3.184e-10	6.29	3.747e-06	0.1198	0.0004563	0.07048	8.33125e-05	0.9191	0.0835789	intronic	PDE4B	.	.	.
2	rs2186123	1	66435842	G	A	0.3569	0.3948	3.01e-10	6.298	4.96e-06	0.1226	0.0005153	0.07311	8.42093e-05	0.9122	0.0845252	intronic	PDE4B	.	.	.
2	rs6691929	1	66435953	G	A	0.2893	0.3401	6.961e-12	6.858	3.247e-08	0.02408	0.00448	0.03058	0.000208238	0.9076	0.0104016	intronic	PDE4B	.	.	.
2	rs2503207	1	66438655	G	A	0.3569	0.3991	1.939e-09	6.003	7.522e-06	0.1246	0.0008433	0.104	8.88608e-05	0.7123	0.11541	intronic	PDE4B	.	.	.
2	rs1937439	1	66439127	C	A	0.2883	0.33	3.213e-09	5.92	1.378e-08	0.02403	0.005513	0.0378	0.00022007	0.7479	0.0073621	intronic	PDE4B	.	.	.
2	rs2310819	1	66440096	C	T	0.4692	0.5764	3.92e-11	6.607	2.539e-09	0.02104	1.78e-05	0.1051	1.0492e-06	0.9472	0.347941	intronic	PDE4B	.	.	.	y
2	rs1937436	1	66441329	G	A	0.2883	0.3401	1.168e-10	-6.443	1.907e-08	0.024	0.007204	0.04166	0.000218801	0.8248	0.0108212	intronic	PDE4B	.	.	.
2	rs12738832	1	66441357	C	T	0.2465	0.1326	1.776e-12	7.051	1.309e-07	0.006715	0.0004333	0.0097	0.000751606	0.1077	0.366874	intronic	PDE4B	.	.	.
2	rs1937434	1	66441795	G	T	0.3569	0.4006	9.168e-10	6.123	6.584e-06	0.1245	0.0008979	0.1107	8.83527e-05	0.7735	0.114814	intronic	PDE4B	.	.	.
2	rs61799435	1	66441965	C	T	0.2465	0.1326	3.714e-12	-6.948	8.523e-08	0.006592	0.0004243	0.009186	0.000751606	0.1167	0.418048	intronic	PDE4B	.	.	.
2	rs2503201	1	66442025	C	T	0.3569	0.3963	9.709e-10	-6.114	8.692e-06	0.1248	0.0008625	0.108	8.83527e-05	0.7967	0.102142	intronic	PDE4B	.	.	.
2	rs10889591	1	66442338	C	T	0.3569	0.3963	9.858e-10	6.112	9.443e-06	0.1248	0.0008507	0.1072	8.83548e-05	0.7835	0.102103	intronic	PDE4B	.	.	.
2	rs12564578	1	66445516	G	A	0.2883	0.3401	1.342e-11	-6.764	1.588e-08	0.02433	0.007144	0.04773	0.000219099	0.8564	0.012469	intronic	PDE4B	.	.	.
2	rs1937457	1	66446787	C	T	0.2883	0.3401	9.482e-11	-6.475	1.844e-08	0.02433	0.006887	0.05281	0.000219099	0.8824	0.0125237	intronic	PDE4B	.	.	.
2	rs12732753	1	66449249	C	A	0.2465	0.1326	5.122e-09	5.843	0.06104	0.007573	0.0003557	0.009332	0.000751969	0.1229	0.435906	intronic	PDE4B	.	.	.
3	rs7517355	1	73784077	G	A	0.4215	0.5994	3.043e-09	5.929	1.154e-06	0.009779	0.01213	0.01134	0.00679235	0.9912	0.201584	ncRNA_intronic	LINC01360	.	.	.
3	rs2340398	1	73788694	C	T	0.4215	0.6009	2.651e-09	5.952	1.075e-06	0.009229	0.01204	0.01095	0.00678907	0.9766	0.194915	ncRNA_intronic	LINC01360	.	.	.
3	rs2340400	1	73821281	C	T	0.4235	0.6052	8.188e-10	6.141	7.166e-07	0.00528	0.009429	0.0195	0.00790205	0.9214	0.266026	downstream	LINC01360	dist=347	.	.
3	rs6655995	1	73821577	C	A	0.4215	0.5965	5.307e-10	-6.21	8.125e-07	0.007148	0.009092	0.009564	0.00705407	0.9286	0.248735	downstream	LINC01360	dist=643	.	.
3	rs1923216	1	73829128	C	T	0.4235	0.6066	7.37e-10	-6.158	6.989e-07	0.005152	0.009748	0.01825	0.00863436	0.8679	0.228455	intergenic	LINC01360;LINC02238	dist=8194;dist=271771	.	.
3	rs2340403	1	73835777	C	T	0.4215	0.5994	4.896e-10	-6.222	5.595e-07	0.00708	0.01011	0.009591	0.00702846	0.9936	0.228457	intergenic	LINC01360;LINC02238	dist=14843;dist=265122	.	.	y
3	rs6671002	1	73851752	G	A	0.4354	0.6081	1.424e-09	6.053	4.619e-08	0.001421	0.03436	0.03763	0.0140614	0.9928	0.276962	intergenic	LINC01360;LINC02238	dist=30818;dist=249147	.	.
3	rs12035848	1	73870901	G	A	0.4354	0.621	1.351e-09	-6.061	5.609e-08	0.001237	0.03998	0.04252	0.0137142	0.9619	0.159769	intergenic	LINC01360;LINC02238	dist=49967;dist=229998	.	.
3	rs12043387	1	73871205	G	A	0.4354	0.621	1.079e-09	6.097	5.605e-08	0.00124	0.04085	0.04225	0.0151471	0.9619	0.159856	intergenic	LINC01360;LINC02238	dist=50271;dist=229694	.	.
3	rs1475064	1	73882478	G	A	0.4354	0.621	7.275e-10	6.16	2.822e-08	0.001178	0.03627	0.03761	0.0150966	0.9603	0.170888	intergenic	LINC01360;LINC02238	dist=61544;dist=218421	.	.
4	rs472140	2	45139904	C	T	0.4205	0.196	4.355e-11	6.591	3.186e-14	0.149	0.3781	0.0005048	0.00202582	0.3063	0.405967	intergenic	AC067957.1;LINC01833	dist=130635;dist=8312	.	.	y
5	rs10171707	2	101258214	G	A	0.3221	0.2666	1.603e-08	5.65	0.0004408	0.004131	0.09925	0.0004624	0.0355099	0.9996	0.017027	downstream	ENSG00000287832	dist=692	.	.	y
5	rs6542983	2	101294092	C	T	0.3091	0.2464	2.88e-08	5.549	0.001649	0.5886	0.05425	0.0002955	0.0198185	0.6092	0.00513174	intergenic	LINC01868;ENSG00000228488	dist=1592;dist=44591	.	.
6	rs35942385	2	144208523	G	T	0.3569	0.2435	6.939e-09	-5.792	2.161e-07	4.213e-06	0.9499	0.6511	4.71683e-06	0.02444	0.3389	ncRNA_intronic	ENSG00000228655	.	.	.	y
6	rs13411140	2	144215811	C	T	0.3579	0.2478	9.462e-09	-5.74	1.739e-07	4.508e-06	0.8967	0.7091	5.37057e-06	0.03437	0.348908	ncRNA_intronic	ENSG00000228655	.	.	.
6	rs13024996	2	144225215	C	A	0.3588	0.2435	1.419e-08	-5.671	1.26e-07	6.018e-06	0.9155	0.7177	2.39712e-05	0.02254	0.361501	ncRNA_intronic	ENSG00000228655	.	.	.
6	rs4273169	2	144231309	G	A	0.3588	0.2435	1.301e-08	-5.686	1.999e-07	1.241e-05	0.8831	0.8256	2.25845e-05	0.02085	0.326379	ncRNA_intronic	ENSG00000228655	.	.	.
6	rs28684621	2	144231584	G	T	0.3608	0.2435	1.348e-08	5.68	2.004e-07	1.134e-05	0.8758	0.8332	2.29208e-05	0.02071	0.331044	ncRNA_intronic	ENSG00000228655	.	.	.
6	rs10048736	2	144239303	G	A	0.3598	0.2522	3.707e-08	-5.504	5.661e-07	1.295e-05	0.9948	0.6209	0.000120637	0.03017	0.280448	ncRNA_intronic	ENSG00000228655	.	.	.
7	rs6806356	3	48727636	G	A	0.2247	0.1542	1.845e-08	-5.626	0.0001159	0.005964	0.06354	0.05567	0.000136254	0.5732	0.286649	intronic	IP6K2	.	.	.
7	rs4858830	3	48734002	C	T	0.2227	0.1542	1.337e-08	5.681	3.789e-05	0.005039	0.06562	0.05256	0.000138153	0.5604	0.31742	intronic	IP6K2	.	.	.
7	rs4858800	3	48755820	G	A	0.2227	0.1542	1.428e-08	5.67	3.199e-05	0.005618	0.06605	0.0486	0.000122809	0.6804	0.295685	intergenic	IP6K2;PRKAR2A	dist=1109;dist=28199	.	.
7	rs10865953	3	48759562	C	T	0.2237	0.1542	1.739e-08	-5.636	3.462e-05	0.005425	0.0595	0.03734	0.000128375	0.628	0.309268	intergenic	IP6K2;PRKAR2A	dist=4851;dist=24457	.	.
7	rs9848268	3	48762271	C	T	0.2157	0.1268	2.319e-08	-5.586	3.138e-05	0.009851	0.06142	0.02789	0.000171862	0.8134	0.521112	intergenic	IP6K2;PRKAR2A	dist=7560;dist=21748	.	.
7	rs6796790	3	48780317	G	A	0.2197	0.1657	5.855e-09	-5.821	6.36e-05	0.005242	0.0734	0.01967	9.23592e-05	0.4033	0.634953	intergenic	IP6K2;PRKAR2A	dist=25606;dist=3702	.	.
7	rs6442131	3	48782573	C	A	0.2197	0.1657	3.957e-09	-5.886	6.02e-05	0.005275	0.06893	0.01948	9.64384e-05	0.407	0.642345	intergenic	IP6K2;PRKAR2A	dist=27862;dist=1446	.	.
7	rs6766238	3	48801929	G	A	0.2187	0.1398	1.62e-09	-6.032	5.304e-05	0.004734	0.04661	0.02106	9.5284e-05	0.4912	0.464329	intronic	PRKAR2A	.	.	.
7	rs7429596	3	48808531	C	T	0.2167	0.1268	6.376e-09	5.807	5.397e-05	0.007502	0.05232	0.02095	9.09138e-05	0.7933	0.666165	intronic	PRKAR2A	.	.	.
7	rs9859473	3	48837182	C	T	0.2187	0.1398	8.097e-09	5.766	8.362e-05	0.004224	0.04155	0.01969	9.15082e-05	0.4288	0.476592	intronic	PRKAR2A	.	.	.
7	rs7639370	3	48837917	C	T	0.2187	0.1369	4.094e-09	-5.88	4.444e-05	0.005729	0.04561	0.02105	9.97424e-05	0.6723	0.586022	intronic	PRKAR2A	.	.	.
7	rs7611628	3	48838364	C	T	0.2187	0.1398	8.194e-09	5.764	8.485e-05	0.004488	0.04074	0.01926	9.15166e-05	0.4288	0.47572	intronic	PRKAR2A	.	.	.
7	rs9879978	3	48846600	G	T	0.2197	0.1398	1.121e-09	6.091	7.462e-05	0.004112	0.04108	0.01945	9.15082e-05	0.4578	0.472869	intronic	PRKAR2A	.	.	.
7	rs9284885	3	48883100	C	A	0.2207	0.1643	6.472e-09	5.804	9.137e-05	0.004789	0.06502	0.01799	9.15082e-05	0.4092	0.751703	intronic	PRKAR2A	.	.	.
7	rs4974088	3	48898749	C	T	0.2177	0.1268	3.033e-08	5.54	0.0001037	0.006686	0.04547	0.01836	9.65873e-05	0.815	0.68545	intronic	SLC25A20	.	.	.
7	rs7611358	3	48927856	C	T	0.2197	0.1398	5.316e-09	-5.837	0.0001037	0.00485	0.05496	0.01785	0.000100693	0.4791	0.482593	intronic	SLC25A20	.	.	.
7	rs7621226	3	48928759	C	T	0.2197	0.1398	4.527e-09	5.864	0.0001011	0.004807	0.05229	0.01752	0.000100693	0.4791	0.430321	intronic	SLC25A20	.	.	.
7	rs12715430	3	48942855	C	A	0.2197	0.1398	2.264e-09	5.978	8.682e-05	0.004562	0.0405	0.01731	9.86984e-05	0.4905	0.45913	intergenic	SLC25A20;ARIH2OS	dist=6518;dist=12360	.	.
7	rs11707968	3	48953349	C	T	0.2197	0.1398	1.905e-09	-6.006	8.468e-05	0.004707	0.03644	0.01481	0.000110459	0.4905	0.464314	intergenic	SLC25A20;ARIH2OS	dist=17012;dist=1866	.	.
7	rs9284886	3	48960572	G	A	0.2197	0.1398	1.532e-08	5.658	0.0001071	0.0047	0.04333	0.1554	0.000120973	0.4948	0.45498	intronic	ARIH2	.	.	.
7	rs7653408	3	48972351	C	A	0.2197	0.1398	1.96e-09	6.001	7.774e-05	0.004779	0.04325	0.01524	0.000120083	0.4923	0.457478	intronic	ARIH2	.	.	.
7	rs9864243	3	48982732	G	A	0.2197	0.1398	1.899e-09	-6.006	8.422e-05	0.005016	0.03619	0.01821	0.000115958	0.4891	0.420532	intronic	ARIH2	.	.	.
7	rs7372883	3	48991255	G	A	0.2197	0.1398	1.821e-09	-6.013	8.58e-05	0.005102	0.03215	0.01538	0.000109999	0.4891	0.425841	intronic	ARIH2	.	.	.
7	rs7434187	3	49032967	C	T	0.2167	0.1311	4.55e-09	-5.863	0.0001159	0.005257	0.04242	0.0141	8.53513e-05	0.9683	0.509633	intronic	P4HTM	.	.	.
7	rs6446204	3	49034879	C	T	0.2167	0.1268	1.042e-08	5.724	0.0001236	0.006648	0.05014	0.01587	8.37375e-05	0.7285	0.663737	intronic	P4HTM	.	.	.
7	rs6772452	3	49040462	G	A	0.2207	0.1686	7.053e-09	5.79	0.0001783	0.006655	0.02794	0.01851	8.03286e-05	0.7834	0.847971	intronic	P4HTM	.	.	.
7	rs6414614	3	49061328	C	T	0.2167	0.1268	1.481e-08	5.664	0.000152	0.006867	0.04612	0.01429	7.75408e-05	0.7024	0.689037	downstream	ENSG00000290315;IMPDH2;NDUFAF3	dist=430	.	.
7	rs4974081	3	49070499	C	T	0.2197	0.1398	5.701e-09	-5.825	0.0001399	0.004492	0.02989	0.01502	7.77106e-05	0.5085	0.411088	intronic	ENSG00000290315;QRICH1	.	.	.
7	rs9810318	3	49076071	C	T	0.2167	0.1268	1.363e-08	5.678	0.0002889	0.006607	0.04168	0.01486	7.77463e-05	0.8041	0.695915	intronic	ENSG00000290315;QRICH1	.	.	.
7	rs6787808	3	49079105	C	T	0.2197	0.1398	5.276e-09	5.838	0.000167	0.004466	0.02696	0.01373	7.75408e-05	0.511	0.411107	intronic	ENSG00000290315;QRICH1	.	.	.
7	rs6798112	3	49093377	G	A	0.2197	0.1398	4.601e-09	5.861	0.0001369	0.004477	0.02577	0.01396	7.7539e-05	0.5159	0.411107	intronic	ENSG00000290315;QRICH1	.	.	.
7	rs13099075	3	49100305	C	T	0.2197	0.1398	5.102e-09	5.844	0.0001407	0.004474	0.02758	0.01413	7.95097e-05	0.5159	0.411116	intronic	ENSG00000290315;QRICH1	.	.	.
7	rs4955416	3	49108428	C	T	0.2207	0.1643	8.317e-09	5.762	0.0001262	0.004629	0.03466	0.01613	7.43789e-05	0.4021	0.683111	intronic	ENSG00000290315;QRICH1	.	.	.
7	rs11130181	3	49109919	G	A	0.2256	0.1729	1.242e-08	-5.694	0.0001787	0.004533	0.04351	0.01715	8.687e-05	0.5069	0.489161	intronic	ENSG00000290315;QRICH1	.	.	.
7	rs4955426	3	49143438	C	A	0.1998	0.1239	1.849e-09	-6.011	0.0002618	0.007575	0.02418	0.03263	3.89296e-06	0.9602	0.668232	intergenic	QARS1;USP19	dist=1247;dist=2041	.	.
7	rs4955411	3	49145304	G	A	0.2028	0.1599	8.533e-10	6.135	0.0002298	0.00575	0.01836	0.0312	2.95216e-06	0.3492	0.62711	downstream	USP19	dist=175	.	.
7	rs4292260	3	49148890	C	T	0.2028	0.1599	1.067e-09	6.099	0.0002641	0.006208	0.01814	0.03175	3.43827e-06	0.3447	0.632264	intronic	USP19	.	.	.
7	rs9865051	3	49166069	C	T	0.2087	0.147	3.921e-09	-5.888	0.0004732	0.005958	0.01883	0.03543	4.00433e-06	0.5354	0.261788	intronic	LAMB2	.	.	.
7	rs9586	3	49213637	C	T	0.2068	0.1931	1.031e-08	-5.726	0.0003194	0.03424	0.02582	0.214	2.66588e-07	0.9933	0.314505	UTR3	KLHDC8B	ENST00000332780.4_3:c.*403T>C	.	.
7	rs9834003	3	49216472	C	T	0.2445	0.2089	5.765e-10	6.197	1.235e-05	0.0058	0.04151	0.07703	1.06091e-06	0.7768	0.468531	intronic	C3orf84	.	.	.
7	rs4955421	3	49218888	G	A	0.2445	0.2075	5.947e-10	-6.192	1.349e-05	0.005354	0.04128	0.08287	1.0293e-06	0.7949	0.449374	intronic	C3orf84	.	.	.
7	rs4955423	3	49220448	G	A	0.2445	0.2089	4.914e-10	-6.222	1.427e-05	0.005221	0.1815	0.07854	1.01468e-06	0.7392	0.508452	intronic	C3orf84	.	.	.
7	rs7432077	3	49222904	C	T	0.2445	0.2089	4.91e-10	6.222	1.428e-05	0.005327	0.04449	0.07533	9.89532e-07	0.7486	0.485316	intronic	C3orf84	.	.	.
7	rs6446256	3	49224210	G	A	0.2445	0.2089	6.877e-10	6.169	1.4e-05	0.005154	0.04478	0.07705	9.74496e-07	0.8463	0.550103	intronic	C3orf84	.	.	.
7	rs7429661	3	49228800	G	A	0.2435	0.1801	3.783e-10	-6.263	2.335e-05	0.004496	0.03756	0.07747	9.24656e-07	0.9553	0.270575	intronic	C3orf84	.	.	.
7	rs11130183	3	49228946	G	A	0.2445	0.2089	6.87e-10	6.169	1.552e-05	0.005301	0.04524	0.0787	9.97333e-07	0.7799	0.488421	intronic	C3orf84	.	.	.
7	rs6808036	3	49236439	G	T	0.2445	0.2089	4.739e-10	6.227	1.533e-05	0.005047	0.04353	0.07544	8.67042e-07	0.6286	0.443556	UTR5	IHO1	ENST00000296449.9_2:c.-12775G>T;ENST00000438782.5_2:c.-12775G>T	.	.
7	rs13091206	3	49238718	G	A	0.2038	0.1225	2.199e-08	5.596	0.0001845	0.009782	0.0111	0.572	3.76843e-06	0.7253	0.728071	intronic	IHO1	.	.	.
7	rs4955439	3	49245645	G	T	0.2435	0.1816	4.406e-10	6.239	1.955e-05	0.004419	0.03456	0.08497	8.34507e-07	0.8276	0.256837	intronic	IHO1	.	.	.
7	rs9867285	3	49249381	G	A	0.2435	0.1816	4.268e-10	6.244	2.037e-05	0.004462	0.03621	0.07635	8.27237e-07	0.8012	0.271376	intronic	IHO1	.	.	.
7	rs6446257	3	49253492	C	T	0.2435	0.1816	5.19e-10	-6.213	1.993e-05	0.005316	0.03734	0.07431	8.20163e-07	0.8107	0.303723	intronic	IHO1	.	.	.
7	rs6803264	3	49254427	C	T	0.2028	0.1225	1.762e-09	6.018	0.0002801	0.01094	0.01436	0.02715	3.59038e-06	0.6621	0.789701	intronic	IHO1	.	.	.
7	rs2082923	3	49255172	C	T	0.2445	0.2089	6.378e-10	6.181	1.442e-05	0.005539	0.04158	0.07554	8.16094e-07	0.6623	0.51578	intronic	IHO1	.	.	.
7	rs2099526	3	49269758	G	T	0.2435	0.2089	4.929e-10	-6.221	1.337e-05	0.00601	0.03615	0.06965	8.18333e-07	0.6217	0.510624	intronic	IHO1	.	.	.
7	rs7619016	3	49272589	C	T	0.2425	0.1816	2.652e-10	-6.318	2.595e-05	0.004822	0.03155	0.06831	8.11652e-07	0.6821	0.229419	intronic	IHO1	.	.	.
7	rs11130186	3	49275828	G	A	0.2435	0.2104	3.538e-10	6.273	1.098e-05	0.005386	0.03333	0.07089	6.77033e-07	0.6709	0.497304	intronic	IHO1	.	.	.
7	rs10154992	3	49276077	C	T	0.2435	0.2089	3.57e-10	-6.272	1.132e-05	0.005444	0.03317	0.06688	7.96416e-07	0.6528	0.493782	intronic	IHO1	.	.	.
7	rs12637346	3	49284513	G	A	0.2435	0.2089	3.964e-10	6.255	1.165e-05	0.005625	0.03159	0.06994	9.63629e-07	0.6425	0.486068	intronic	IHO1	.	.	.
7	rs4955443	3	49286618	G	T	0.2435	0.2089	4.101e-10	6.25	1.232e-05	0.005826	0.03316	0.06978	8.12793e-07	0.5977	0.511343	intronic	IHO1	.	.	.
7	rs7626076	3	49298139	G	A	0.2425	0.1816	2.027e-10	-6.359	1.123e-05	0.005268	0.03382	0.06005	8.10924e-07	0.7365	0.304439	ncRNA_exonic	ENSG00000225399	.	.	.
7	rs4955417	3	49298205	C	T	0.2435	0.2118	2.883e-10	6.305	9.279e-06	0.005923	0.03615	0.08094	8.02029e-07	0.671	0.430926	ncRNA_exonic	ENSG00000225399	.	.	.
7	rs11130187	3	49307872	C	T	0.2445	0.2089	2.159e-10	6.35	8.343e-06	0.005779	0.03152	0.06719	8.03138e-07	0.6634	0.548557	UTR3	C3orf62	ENST00000343010.8_9:c.*741G>A	.	.
7	rs6809851	3	49309787	C	A	0.2435	0.1844	2.658e-09	-5.951	1.103e-05	0.005756	0.06649	0.07272	1.52908e-06	0.9185	0.36888	intronic	C3orf62	.	.	.
7	rs6778080	3	49317338	C	T	0.2435	0.2017	2.539e-10	6.325	5.639e-06	0.005628	0.02796	0.074	7.69768e-07	0.7569	0.51833	intronic	USP4	.	.	.
7	rs11710434	3	49346130	C	T	0.2306	0.2017	2.341e-10	6.337	2.442e-06	0.009514	0.01266	0.1249	8.55323e-06	0.5328	0.39952	intronic	USP4	.	.	.
7	rs11720542	3	49357427	G	A	0.2306	0.2017	2.939e-10	6.302	3.005e-06	0.009011	0.01353	0.1351	8.34776e-06	0.5172	0.41631	intronic	USP4	.	.	.
7	rs13088309	3	49368317	G	A	0.2336	0.2032	3.565e-10	6.272	2.981e-06	0.008267	0.009997	0.07141	8.67501e-06	0.5774	0.483001	intronic	USP4	.	.	.
7	rs6809204	3	49369383	C	T	0.2336	0.1772	1.699e-10	-6.386	2.677e-06	0.008956	0.01441	0.08592	3.01502e-06	0.6178	0.347685	intronic	USP4	.	.	.	y
7	rs4955430	3	49378088	G	A	0.2336	0.2017	5.304e-10	-6.21	2.367e-06	0.008315	0.01151	0.08454	8.70522e-06	0.5908	0.48272	upstream	USP4	dist=602	.	.
7	rs6784203	3	49381678	C	T	0.2336	0.1772	2.854e-10	-6.307	2.941e-06	0.008897	0.01443	0.08455	8.84851e-06	0.5813	0.347816	intergenic	USP4;GPX1	dist=4192;dist=12929	.	.
7	rs4955424	3	49383078	G	A	0.2326	0.1772	2.481e-10	6.328	3.224e-06	0.008665	0.01243	0.1431	8.39383e-06	0.6043	0.346601	intergenic	USP4;GPX1	dist=5592;dist=11529	.	.
7	rs4955425	3	49383178	G	A	0.2336	0.1772	3.075e-10	6.295	2.874e-06	0.009499	0.01507	0.08565	8.4155e-06	0.5922	0.348646	intergenic	USP4;GPX1	dist=5692;dist=11429	.	.
7	rs4955440	3	49388633	C	T	0.2316	0.1988	4.289e-10	6.243	3.097e-06	0.00766	0.01123	0.08839	8.66423e-06	0.7607	0.666378	intergenic	USP4;GPX1	dist=11147;dist=5974	.	.
7	rs11720657	3	49392620	G	A	0.2316	0.1988	4.097e-10	6.25	2.64e-06	0.007681	0.012	0.09254	8.05137e-06	0.6499	0.693308	intergenic	USP4;GPX1	dist=15134;dist=1987	.	.
7	rs6790105	3	49393409	C	T	0.2326	0.2104	1.076e-09	-6.098	3.607e-06	0.008802	0.01273	0.09359	8.04359e-06	0.648	0.681851	intergenic	USP4;GPX1	dist=15923;dist=1198	.	.
7	rs3448	3	49396751	C	T	0.2316	0.1988	3.267e-10	6.286	2.738e-06	0.00758	0.01257	0.08171	8.41938e-06	0.7473	0.667897	UTR3	RHOA	ENST00000422781.6_6:c.*1048G>A;ENST00000678200.1_2:c.*891G>A;ENST00000454011.7_6:c.*1079G>A;ENST00000678921.2_5:c.*3172G>A;ENST00000676712.2_5:c.*891G>A;ENST00000418115.6_6:c.*891G>A	.	.
7	rs974495	3	49400482	C	T	0.2326	0.2104	2.13e-09	5.988	4.676e-06	0.008738	0.01337	0.09227	7.75497e-06	0.663	0.68364	intronic	ENSG00000290318;RHOA	.	.	.
7	rs6446262	3	49401153	C	T	0.2316	0.1744	5.203e-10	6.213	3.445e-06	0.008226	0.01391	0.08425	7.9704e-06	0.786	0.504157	intronic	ENSG00000290318;RHOA	.	.	.
7	rs11130190	3	49402137	C	T	0.2316	0.1988	3.451e-10	6.277	2.733e-06	0.007654	0.01332	0.08425	7.95738e-06	0.724	0.667273	intronic	ENSG00000290318;RHOA	.	.	.
7	rs9812360	3	49402351	C	T	0.2316	0.1744	4.669e-10	6.23	3.438e-06	0.008151	0.01314	0.08115	7.94859e-06	0.786	0.504157	intronic	ENSG00000290318;RHOA	.	.	.
7	rs4955413	3	49410066	C	A	0.2316	0.1988	3.922e-10	6.257	2.76e-06	0.007672	0.01475	0.08468	7.93725e-06	0.7458	0.666296	intronic	ENSG00000290318;RHOA	.	.	.
7	rs6769744	3	49412015	C	T	0.2326	0.2104	4.443e-10	-6.238	3.742e-06	0.008927	0.01498	0.08732	7.93725e-06	0.6966	0.685784	intronic	ENSG00000290318;RHOA	.	.	.
7	rs6775069	3	49412496	G	A	0.2326	0.2104	4.769e-10	6.227	3.736e-06	0.009521	0.01517	0.08733	7.93725e-06	0.6949	0.689479	intronic	ENSG00000290318;RHOA	.	.	.
7	rs9842132	3	49427933	G	A	0.2316	0.1988	6.264e-10	6.184	2.717e-06	0.008004	0.01255	0.08484	1.28053e-05	0.744	0.686179	intronic	ENSG00000290318;RHOA	.	.	.
7	rs62259944	3	49430883	G	A	0.2316	0.1671	1.763e-09	6.018	2.8e-06	0.009427	0.01386	0.1049	1.02127e-05	0.8765	0.618425	intronic	ENSG00000290318;RHOA	.	.	.
7	rs10155014	3	49432321	C	T	0.2326	0.2104	6.665e-10	-6.174	4.353e-06	0.01066	0.01258	0.08813	1.02117e-05	0.7245	0.683262	intronic	ENSG00000290318;RHOA	.	.	.
7	rs9861027	3	49436584	C	T	0.2316	0.1988	4.89e-10	6.223	3.242e-06	0.007911	0.01167	0.07977	7.92903e-06	0.8096	0.685814	intronic	ENSG00000290318;RHOA	.	.	.
7	rs7648995	3	49438803	C	T	0.2316	0.1988	2.152e-10	6.35	3.456e-06	0.007911	0.01276	0.0841	7.92903e-06	0.8097	0.685814	intronic	ENSG00000290318;RHOA	.	.	.
7	rs2140270	3	49439440	G	A	0.2316	0.1988	2.105e-10	-6.353	3.471e-06	0.007911	0.01245	0.08416	7.92903e-06	0.8097	0.685814	intronic	ENSG00000290318;RHOA	.	.	.
7	rs62259947	3	49439924	C	T	0.2316	0.1744	1.581e-09	-6.036	4.318e-06	0.008446	0.01211	0.08194	7.92903e-06	0.8614	0.52895	intronic	ENSG00000290318;RHOA	.	.	.
7	rs13096474	3	49443081	C	T	0.2326	0.2104	4.238e-10	6.245	3.092e-06	0.01067	0.01325	0.08837	7.85398e-06	0.715	0.684231	intronic	ENSG00000290318;RHOA	.	.	.
7	rs13061396	3	49444904	C	T	0.2326	0.2104	7.413e-10	6.157	3.162e-06	0.01059	0.007498	0.6605	7.89423e-06	0.8297	0.709631	intronic	ENSG00000290318;RHOA	.	.	.
7	rs940045	3	49449638	G	A	0.2326	0.2104	8.425e-10	-6.137	5.48e-06	0.01089	0.01303	0.08708	7.89423e-06	0.7172	0.683398	intronic	RHOA	.	.	.
7	rs7620024	3	49451691	G	A	0.2316	0.1988	4.651e-10	6.23	3.832e-06	0.00813	0.01219	0.08544	7.89369e-06	0.9058	0.685522	intronic	TCTA	.	.	.
7	rs1464569	3	49460350	G	A	0.2326	0.2075	5.361e-10	6.208	6.303e-06	0.01069	0.01198	0.07627	7.98656e-06	0.6784	0.641252	UTR3	NICN1	ENST00000273598.8_7:c.*1916C>T	.	.
7	rs8897	3	49460407	C	T	0.2316	0.1974	6.814e-10	6.17	4.72e-06	0.008405	0.0113	0.08743	7.89369e-06	0.7963	0.712086	UTR3	NICN1	ENST00000273598.8_7:c.*1859G>A;ENST00000615713.4_6:c.*1203G>A	.	.
7	rs6446275	3	49466871	G	A	0.2316	0.1988	6.433e-10	-6.179	4.395e-06	0.007966	0.01118	0.09173	7.89369e-06	0.8092	0.684747	upstream	ENSG00000283189;NICN1	dist=112	.	.
7	rs62259933	3	49469703	G	A	0.2316	0.1988	5.355e-10	6.208	6.143e-06	0.007975	0.01068	0.09375	7.89369e-06	0.8354	0.669461	intergenic	NICN1;DAG1	dist=2944;dist=36443	.	.
7	rs9654010	3	49480908	C	T	0.2316	0.1988	2.353e-09	-5.971	7.034e-06	0.007874	0.01102	0.09374	7.47498e-06	0.9017	0.684584	intergenic	NICN1;DAG1	dist=14149;dist=25238	.	.
7	rs57273516	3	49483074	G	A	0.2326	0.2104	2.104e-09	5.99	1.018e-05	0.01082	0.00893	0.09678	7.47257e-06	0.8379	0.680126	intergenic	NICN1;DAG1	dist=16315;dist=23072	.	.
7	rs138084484	3	49483193	C	T	0.2306	0.1744	1.287e-09	6.069	5.019e-06	0.007651	0.0101	0.08751	7.47498e-06	0.8101	0.505518	intergenic	NICN1;DAG1	dist=16434;dist=22953	.	.
7	rs11923032	3	49484992	C	T	0.2326	0.2104	6.495e-09	5.803	9.831e-06	0.01071	0.008269	0.0948	5.67401e-06	0.8082	0.634162	intergenic	NICN1;DAG1	dist=18233;dist=21154	.	.
7	rs4855869	3	49488984	C	T	0.2326	0.2104	1.385e-09	6.057	6.372e-06	0.01039	0.00416	0.6731	7.47257e-06	0.8426	0.68026	intergenic	NICN1;DAG1	dist=22225;dist=17162	.	.
7	rs113741748	3	49490780	G	A	0.2316	0.1988	2.326e-10	6.338	6.886e-06	0.007594	0.007992	0.09399	7.09643e-06	0.8365	0.684844	intergenic	NICN1;DAG1	dist=24021;dist=15366	.	.
7	rs2329025	3	49496263	G	A	0.2326	0.2118	7.468e-09	-5.78	6.653e-06	0.01038	0.01118	0.09551	7.09267e-06	0.7472	0.680396	intergenic	NICN1;DAG1	dist=29504;dist=9883	.	.
7	rs9860055	3	49506900	C	T	0.2316	0.1988	1.186e-09	6.082	4.074e-06	0.007553	0.009679	0.09302	9.95291e-06	0.8983	0.675157	intronic	DAG1	.	.	.
7	rs7613491	3	49508976	C	T	0.2316	0.1744	1.689e-09	-6.025	5.318e-06	0.008912	0.01244	0.09315	1.00136e-05	0.929	0.530292	intronic	DAG1	.	.	.
7	rs7647973	3	49510931	G	A	0.2336	0.1744	9.351e-09	5.742	8.156e-06	0.008679	0.01445	0.09242	9.97424e-06	0.8945	0.532825	intronic	DAG1	.	.	.
7	rs9809237	3	49516350	G	A	0.2326	0.2104	8.153e-10	-6.142	7.834e-06	0.01214	0.01055	0.09748	8.92791e-06	0.9451	0.671207	intronic	DAG1	.	.	.
7	rs7355800	3	49516519	C	T	0.2316	0.1988	6.513e-10	6.177	6.987e-06	0.008581	0.01074	0.0962	1.11988e-05	0.9796	0.684755	intronic	DAG1	.	.	.
7	rs62261183	3	49522458	C	T	0.2316	0.1988	8.36e-10	6.138	7.509e-06	0.008614	0.01162	0.09627	9.32932e-06	0.9693	0.684614	intronic	DAG1	.	.	.
7	rs74471041	3	49542543	G	T	0.2316	0.1988	1.773e-09	-6.017	1.472e-05	0.007238	0.009631	0.1002	9.41348e-06	0.9732	0.722881	intronic	DAG1	.	.	.
7	rs3905330	3	49550774	G	A	0.2326	0.2104	2.161e-09	5.985	1.763e-05	0.01143	0.008986	0.106	9.39399e-06	0.8684	0.669777	intronic	DAG1	.	.	.
8	rs10511087	3	85439136	G	A	0.3787	0.4409	1.915e-08	5.62	1.247e-08	0.006685	0.001278	0.1435	0.791486	0.9616	0.337139	intronic	CADM2	.	.	.
8	rs12637791	3	85525323	G	T	0.3519	0.2637	4.718e-08	5.462	5.51e-09	0.001194	0.0001422	0.5097	0.719126	0.3043	0.895305	intronic	CADM2	.	.	.
8	rs726610	3	85551403	C	T	0.3489	0.2406	3.46e-08	-5.516	8.425e-09	0.002146	0.0001184	0.5258	0.738504	0.2592	0.603695	intronic	CADM2	.	.	.
8	rs4637303	3	85552787	C	T	0.3519	0.2637	2.563e-08	-5.569	1.142e-08	0.001125	0.0001474	0.5353	0.748094	0.2895	0.913822	intronic	CADM2	.	.	.
8	rs12629607	3	85583608	C	T	0.3489	0.2406	1.991e-08	5.613	7.89e-09	0.002127	0.0002126	0.5315	0.735988	0.228	0.59112	intronic	CADM2	.	.	.
8	rs6807666	3	85594428	C	A	0.3519	0.2695	3.547e-08	5.512	1.45e-08	0.0009685	0.0001713	0.5275	0.745283	0.5077	0.998358	intronic	CADM2	.	.	.
8	rs2326319	3	85597135	G	A	0.3519	0.2695	2.571e-08	-5.568	1.234e-08	0.001062	0.0001598	0.6631	0.736923	0.5146	0.985361	intronic	CADM2	.	.	.
8	rs6549035	3	85599067	C	T	0.3519	0.2695	2.079e-08	5.605	1.38e-08	0.001049	0.0001689	0.555	0.767535	0.5085	0.968506	intronic	CADM2	.	.	.
8	rs62253967	3	85599588	G	A	0.3519	0.2695	3.578e-08	-5.511	1.443e-08	0.001059	0.0001823	0.5354	0.767535	0.5126	0.99044	intronic	CADM2	.	.	.
8	rs62253968	3	85599601	C	T	0.3519	0.2695	3.574e-08	5.511	1.439e-08	0.001059	0.0001823	0.5354	0.767535	0.5126	0.99044	intronic	CADM2	.	.	.
8	rs2029134	3	85603262	G	T	0.3519	0.2695	3.125e-08	5.534	1.461e-08	0.001049	0.0001951	0.5682	0.737091	0.5204	0.985085	intronic	CADM2	.	.	.
8	rs7618494	3	85603309	G	A	0.3519	0.2637	2.199e-08	5.596	1.315e-08	0.001231	0.0001589	0.5167	0.734744	0.2832	0.868085	intronic	CADM2	.	.	.
8	rs7640828	3	85603371	G	A	0.3519	0.2695	3.089e-08	-5.536	1.352e-08	0.001058	0.0002009	0.5684	0.734632	0.5204	0.985085	intronic	CADM2	.	.	.
8	rs7652683	3	85603462	C	T	0.3489	0.2406	1.272e-08	5.69	6.361e-09	0.002214	0.0001323	0.5135	0.725139	0.2454	0.570274	intronic	CADM2	.	.	.
8	rs7652808	3	85603643	G	T	0.3489	0.2406	1.259e-08	5.692	6.743e-09	0.002209	0.000142	0.4918	0.725371	0.2454	0.570274	intronic	CADM2	.	.	.	y
8	rs60541362	3	85610855	G	A	0.3519	0.2695	3.054e-08	5.538	1.653e-08	0.001019	0.0002162	0.4669	0.712947	0.5421	0.989855	intronic	CADM2	.	.	.
8	rs1551042	3	85630551	C	A	0.3509	0.268	2.629e-08	5.565	1.06e-08	0.00148	0.0001896	0.4655	0.67482	0.3916	0.997318	intronic	CADM2	.	.	.
9	rs13126505	4	102865304	G	A	0.06163	0.0331	6.494e-09	-5.804	1.065e-17	0.05145	0.5632	0.1551	0.21593	0.1893	0.034333	intronic	BANK1	.	.	.
9	rs13109404	4	102896591	G	T	0.06163	0.0331	1.968e-09	6	1.246e-18	0.04994	0.5964	0.1182	0.157047	0.2418	0.0312587	intronic	BANK1	.	.	.	y
10	rs72678864	4	112422145	G	A	0.1521	0.0591	5.212e-09	-5.84	0.0002111	3.475e-05	0.1057	0.0003855	0.138885	0.2209	0.890389	intergenic	ENSG00000288692;ENSG00000248656	dist=114755;dist=15128	.	.	y
10	rs11729080	4	112503872	G	A	0.1521	0.0576	1.963e-08	-5.615	0.0001454	1.973e-05	0.1213	0.0003277	0.131946	0.2647	0.826135	ncRNA_intronic	ENSG00000248656	.	.	.
11	rs2073526	6	26374658	G	A	0.4115	0.5317	1.044e-08	-5.723	0.04361	0.005105	0.0007247	0.1126	0.000115438	0.1641	0.0399182	intronic	BTN3A2	.	.	.
11	rs1614887	6	26393021	G	A	0.4215	0.4971	7.234e-09	-5.785	0.01955	0.001472	0.001677	0.0646	3.49994e-05	0.07718	0.367766	exonic	BTN2A2	.	synonymous SNV	BTN2A2:ENST00000482536.5_1:exon6:c.G768A:p.S256S,BTN2A2:ENST00000352867.6_1:exon7:c.G1050A:p.S350S,BTN2A2:ENST00000356709.9_3:exon8:c.G1398A:p.S466S,BTN2A2:ENST00000416795.6_1:exon8:c.G1398A:p.S466S
11	rs1796520	6	26410800	C	T	0.4384	0.5187	6.626e-11	-6.529	0.03252	0.004397	7.608e-06	0.03487	3.26686e-05	0.01917	0.202778	intronic	BTN3A1	.	.	.	y
11	rs742090	6	26415637	C	A	0.4384	0.5187	1.51e-10	6.404	0.03289	0.004336	8.692e-06	0.05115	6.09916e-05	0.01649	0.214304	downstream	BTN3A1	dist=201	.	.
11	rs1796521	6	26421392	C	T	0.4374	0.5144	7.953e-11	6.501	0.03105	0.004293	9.786e-06	0.04759	3.73491e-05	0.03442	0.172767	upstream	BTN2A3P	dist=233	.	.
11	rs1796522	6	26422260	G	A	0.4374	0.5187	5.417e-10	-6.207	0.03962	0.004065	1.034e-05	0.05568	3.60131e-05	0.01656	0.228914	ncRNA_intronic	BTN2A3P	.	.	.
11	rs1624440	6	26433329	G	A	0.4384	0.5187	3.445e-10	-6.277	0.03768	0.003967	9.053e-06	0.03935	4.01772e-05	0.01912	0.210563	downstream	BTN2A3P	dist=718	.	.
11	rs9295689	6	26455811	C	T	0.4513	0.5288	3.039e-08	-5.539	0.05229	0.001995	0.01012	0.0442	0.000355091	0.01849	0.0906805	intergenic	BTN3A3;BTN2A1	dist=2168;dist=2321	.	.
11	rs3734540	6	26463321	C	A	0.4523	0.5317	7.761e-11	-6.505	0.03529	0.003565	1.79e-06	0.03677	0.00033693	0.02276	0.101231	intronic	BTN2A1	.	.	.
11	rs1977198	6	26466225	C	A	0.4851	0.5476	1.655e-08	-5.645	0.1991	0.003571	0.0001216	0.09232	0.000577298	0.02707	0.182924	intronic	BTN2A1	.	.	.
11	rs1407045	6	26476155	G	A	0.4513	0.5317	8.925e-11	-6.484	0.03505	0.003689	3.683e-06	0.06758	0.000295345	0.008312	0.129945	intronic	BTN2A1	.	.	.
11	rs12525684	6	26483910	C	A	0.4503	0.5331	2.104e-10	-6.354	0.02743	0.003415	3.108e-06	0.09411	0.000302496	0.008982	0.1206	intergenic	BTN2A1;BTN1A1	dist=7061;dist=16621	.	.
11	rs3757151	6	26498165	C	T	0.4423	0.5893	3.871e-08	5.497	0.01757	0.1124	1.675e-05	0.2547	0.000271119	0.1105	0.108531	intergenic	BTN2A1;BTN1A1	dist=21316;dist=2366	.	.
11	rs9467773	6	26498426	G	A	0.4423	0.5893	4.244e-08	-5.48	0.01713	0.09315	1.459e-05	0.2217	0.000268318	0.1136	0.0998064	intergenic	BTN2A1;BTN1A1	dist=21577;dist=2105	.	.
11	rs6926629	6	26499903	C	T	0.4423	0.5893	1.341e-08	-5.681	0.01568	0.09048	1.586e-05	0.2287	0.000273659	0.1128	0.113342	upstream	BTN1A1	dist=628	.	.
11	rs6903973	6	26499942	C	A	0.4423	0.5893	1.409e-08	5.672	0.01663	0.09145	2.15e-05	0.2103	0.000255488	0.1058	0.107358	upstream	BTN1A1	dist=589	.	.
11	rs1321479	6	26501897	C	T	0.4423	0.5879	1.699e-08	-5.64	0.01542	0.1014	1.735e-05	0.2529	0.000308397	0.09813	0.0879497	exonic	BTN1A1	.	synonymous SNV	BTN1A1:ENST00000244513.10_1:exon2:c.T159T:p.S53S,BTN1A1:ENST00000684113.1_1:exon3:c.T159T:p.S53S
11	rs9461259	6	26504835	C	A	0.4423	0.5879	1.451e-08	5.667	0.01628	0.09975	1.525e-05	0.2324	0.000277991	0.09465	0.105548	intronic	BTN1A1	.	.	.
11	rs9467774	6	26505036	C	A	0.4423	0.5879	1.245e-08	5.693	0.01535	0.1003	1.489e-05	0.2274	0.000270134	0.09543	0.0919099	intronic	BTN1A1	.	.	.
11	rs3736781	6	26505362	G	A	0.4423	0.5879	4.122e-08	5.486	0.0181	0.09718	1.328e-05	0.2123	0.00027006	0.09735	0.104913	exonic	BTN1A1	.	nonsynonymous SNV	BTN1A1:ENST00000244513.10_1:exon3:c.G637A:p.A213T,BTN1A1:ENST00000684113.1_1:exon4:c.G637A:p.A213T
11	rs3736782	6	26505403	C	A	0.4423	0.5879	1.486e-08	5.663	0.01586	0.0978	1.558e-05	0.2513	0.000270327	0.09282	0.0973186	exonic	BTN1A1	.	synonymous SNV	BTN1A1:ENST00000244513.10_1:exon3:c.C678A:p.G226G,BTN1A1:ENST00000684113.1_1:exon4:c.C678A:p.G226G
11	rs2208331	6	26507319	G	A	0.4423	0.5879	1.201e-08	-5.7	0.0154	0.1007	1.455e-05	0.2262	0.000270134	0.08744	0.0914507	intronic	BTN1A1	.	.	.
11	rs1056667	6	26510564	C	T	0.4423	0.5879	1.594e-08	-5.651	0.01566	0.09974	1.408e-05	0.2557	0.000298669	0.08561	0.0907044	UTR3	BTN1A1	ENST00000684113.1_1:c.*1162C>T;ENST00000244513.10_1:c.*1162C>T	.	.
11	rs1056668	6	26510605	C	T	0.4225	0.5086	1.095e-09	6.095	0.05133	0.01507	2.388e-05	0.0767	0.000262633	0.01699	0.0515611	UTR3	BTN1A1	ENST00000684113.1_1:c.*1203C>T;ENST00000244513.10_1:c.*1203C>T	.	.
11	rs9467775	6	26513435	G	A	0.4423	0.5879	3.395e-08	5.52	0.01554	0.09621	1.29e-05	0.2253	0.000236581	0.08444	0.0988162	intergenic	BTN1A1;RNU6-502P	dist=2782;dist=6144	.	.
11	rs9393729	6	26514166	C	T	0.4423	0.5879	3.709e-08	5.504	0.01534	0.09723	1.324e-05	0.2417	0.00023544	0.08923	0.0919495	intergenic	BTN1A1;RNU6-502P	dist=3513;dist=5413	.	.
11	rs9379887	6	26518662	G	A	0.4423	0.5879	3.281e-08	-5.526	0.01533	0.09745	1.25e-05	0.2176	0.000254144	0.08923	0.0919308	downstream	RNU6-502P	dist=917	.	.
11	rs4713006	6	26519872	G	A	0.4423	0.5879	3.338e-08	-5.523	0.01538	0.09754	1.246e-05	0.2172	0.000253916	0.08923	0.0967884	upstream	RNU6-502P	dist=186	.	.
11	rs6925703	6	26521589	G	A	0.4423	0.5879	3.28e-08	5.526	0.01564	0.09647	1.275e-05	0.2165	0.000235955	0.08444	0.103047	upstream	HCG11	dist=348	.	.
11	rs6910930	6	26524061	G	A	0.4423	0.5879	3.801e-08	5.5	0.01594	0.09982	1.166e-05	0.2423	0.000245008	0.08923	0.0944758	ncRNA_exonic	HCG11	.	.	.
11	rs6910899	6	26524339	G	A	0.4423	0.5879	3.666e-08	-5.506	0.01578	0.09982	1.167e-05	0.237	0.00024503	0.08923	0.0944758	ncRNA_exonic	HCG11	.	.	.
11	rs9461267	6	26525455	G	T	0.4423	0.5879	3.5e-08	-5.514	0.01577	0.1001	1.149e-05	0.2367	0.000227091	0.08893	0.094552	ncRNA_exonic	HCG11	.	.	.
11	rs35355150	6	26526039	G	A	0.4354	0.5216	4.561e-09	5.862	0.0241	0.02159	1.689e-05	0.1282	0.000321292	0.01543	0.0515842	ncRNA_exonic	HCG11	.	.	.
11	rs9295695	6	26528250	C	T	0.4414	0.5865	8.748e-09	-5.753	0.01419	0.09966	1.145e-05	0.2432	0.000213088	0.07757	0.0818634	downstream	HCG11	dist=618	.	.
11	rs9393731	6	26529374	C	T	0.4423	0.5879	9.317e-09	5.743	0.01377	0.1006	1.153e-05	0.2394	0.00022046	0.08548	0.0944261	intergenic	HCG11;HMGN4	dist=1742;dist=9220	.	.
11	rs9393732	6	26530898	G	A	0.4423	0.5879	3.296e-08	5.525	0.01363	0.1002	1.114e-05	0.2432	0.000239591	0.09199	0.0945764	intergenic	HCG11;HMGN4	dist=3266;dist=7696	.	.
11	rs9358954	6	26531178	G	A	0.4433	0.5879	9.719e-09	-5.736	0.01381	0.1082	1.105e-05	0.2339	0.000220475	0.08776	0.095649	intergenic	HCG11;HMGN4	dist=3546;dist=7416	.	.
11	rs9467776	6	26531954	C	T	0.4433	0.5879	2.976e-08	5.543	0.01376	0.1012	1.096e-05	0.2329	0.000218348	0.09113	0.0927393	intergenic	HCG11;HMGN4	dist=4322;dist=6640	.	.
11	rs1321480	6	26532742	G	A	0.4433	0.5879	3.533e-08	-5.513	0.01431	0.09868	1.113e-05	0.2597	0.000220496	0.08955	0.0974966	intergenic	HCG11;HMGN4	dist=5110;dist=5852	.	.
11	rs10946835	6	26533757	C	T	0.4423	0.5879	2.882e-08	5.548	0.01355	0.09898	1.142e-05	0.2264	0.000219553	0.09008	0.0974966	intergenic	HCG11;HMGN4	dist=6125;dist=4837	.	.
11	rs9467777	6	26534616	C	A	0.4423	0.5879	2.922e-08	5.546	0.01377	0.0981	1.116e-05	0.2281	0.000220501	0.0944	0.0977088	intergenic	HCG11;HMGN4	dist=6984;dist=3978	.	.
11	rs9467778	6	26534743	C	T	0.4423	0.5879	2.942e-08	-5.545	0.0139	0.09752	1.122e-05	0.228	0.00022046	0.09043	0.101387	intergenic	HCG11;HMGN4	dist=7111;dist=3851	.	.
11	rs2393670	6	26535541	G	A	0.4423	0.5879	2.986e-08	-5.542	0.01415	0.09684	1.118e-05	0.2306	0.000219584	0.09043	0.10077	intergenic	HCG11;HMGN4	dist=7909;dist=3053	.	.
11	rs4713008	6	26538268	C	T	0.4423	0.5879	2.845e-08	-5.551	0.01311	0.0993	1.073e-05	0.2135	0.000220511	0.1151	0.113833	upstream	HMGN4	dist=326	.	.
11	rs6932865	6	26540166	C	A	0.4423	0.5879	2.959e-08	5.544	0.01337	0.09509	1.102e-05	0.2351	0.000220526	0.09482	0.107967	intronic	HMGN4	.	.	.
11	rs6933176	6	26540178	G	A	0.4423	0.5879	2.954e-08	5.544	0.01336	0.09509	1.102e-05	0.2349	0.000220526	0.09482	0.107967	intronic	HMGN4	.	.	.
11	rs6913398	6	26540593	G	T	0.4423	0.5879	9.445e-09	-5.74	0.01363	0.09811	1.121e-05	0.2387	0.000218363	0.09482	0.107788	intronic	HMGN4	.	.	.
11	rs10946837	6	26540844	G	A	0.4354	0.5202	4.041e-09	5.883	0.02284	0.02182	1.607e-05	0.1259	0.00031209	0.01338	0.0528089	intronic	HMGN4	.	.	.
11	rs9467782	6	26542773	G	A	0.4423	0.5879	8.101e-09	5.766	0.01079	0.09965	1.193e-05	0.2269	0.00023663	0.09507	0.111155	intronic	HMGN4	.	.	.
11	rs9467783	6	26542894	C	T	0.4423	0.5879	1.553e-08	5.656	0.002272	0.1	1.166e-05	0.2089	0.000220445	0.09507	0.111183	intronic	HMGN4	.	.	.
11	rs9461270	6	26544110	G	A	0.4423	0.5879	8.756e-09	-5.753	0.01033	0.0859	2.385e-05	0.2134	0.000220445	0.09507	0.11234	intronic	HMGN4	.	.	.
11	rs4871	6	26545632	G	A	0.4423	0.5879	6.964e-09	5.792	0.01161	0.09401	1.109e-05	0.2187	0.000210296	0.09507	0.114482	exonic	HMGN4	.	synonymous SNV	HMGN4:ENST00000377575.3_3:exon2:c.G198A:p.G66G
11	rs4573	6	26546808	C	T	0.4235	0.5072	2.451e-09	-5.965	0.03607	0.01413	2.117e-05	0.07434	0.000220029	0.01845	0.0551976	UTR3	HMGN4	ENST00000377575.3_3:c.*1101C>T	.	.
11	rs1884947	6	26553273	G	T	0.4165	0.4625	5.194e-09	5.841	0.04411	0.01303	1.68e-05	0.09019	0.00209392	0.02124	0.201345	intergenic	HMGN4;ENSG00000284607	dist=6112;dist=16279	.	.
11	rs9467791	6	26562486	G	A	0.4354	0.5432	4.882e-08	5.456	0.01327	0.09699	1.156e-05	0.2151	0.001892	0.1094	0.35246	intergenic	HMGN4;ENSG00000284607	dist=15325;dist=7066	.	.
12	rs10946940	6	27560587	G	A	0.3579	0.3991	3.621e-08	-5.508	0.005962	0.0001653	0.003487	0.06126	0.0555687	0.3143	0.440237	intergenic	ENSG00000285703;RNU6-471P	dist=73373;dist=3604	.	.	y
12	rs6456799	6	27573536	G	A	0.3559	0.389	4.147e-08	-5.484	0.007327	0.0002006	0.003124	0.05552	0.0530127	0.3651	0.475605	intergenic	RNU6-471P;TRNAI6	dist=9240;dist=25652	.	.
12	rs7772027	6	27682914	G	T	0.2366	0.2594	4.18e-08	-5.483	0.02335	6.167e-05	0.05565	0.09737	0.00114628	0.8685	0.0184178	intergenic	LINC01012;ENSG00000287252	dist=1429;dist=42281	.	.
12	rs2394000	6	27686991	G	A	0.2366	0.2622	4.783e-08	5.459	0.02235	6.149e-05	0.05509	0.09703	0.00112702	0.8403	0.0382182	intergenic	LINC01012;ENSG00000287252	dist=5506;dist=38204	.	.
12	rs2056925	6	27690905	G	A	0.2505	0.2781	2.863e-08	5.55	0.02499	5.89e-05	0.06154	0.09797	0.00093644	0.9914	0.00569375	intergenic	LINC01012;ENSG00000287252	dist=9420;dist=34290	.	.
12	rs6902689	6	27709441	C	T	0.2485	0.2853	3.486e-08	-5.515	0.02898	2.986e-05	0.06003	0.1166	0.00139309	0.7745	0.0107844	intergenic	LINC01012;ENSG00000287252	dist=27956;dist=15754	.	.
12	rs6914924	6	27711530	C	T	0.2485	0.2867	4.108e-08	-5.486	0.03261	3.56e-05	0.0603	0.107	0.00137851	0.7509	0.0143522	intergenic	LINC01012;ENSG00000287252	dist=30045;dist=13665	.	.
12	rs6930992	6	27712120	C	A	0.2495	0.2867	4.115e-08	5.486	0.03374	3.546e-05	0.06013	0.1041	0.00137965	0.7509	0.0146397	intergenic	LINC01012;ENSG00000287252	dist=30635;dist=13075	.	.
12	rs6901520	6	27714575	G	T	0.2495	0.2867	4.618e-08	-5.465	0.03351	3.472e-05	0.06402	0.1061	0.00149741	0.7528	0.0142726	intergenic	LINC01012;ENSG00000287252	dist=33090;dist=10620	.	.
12	rs4713121	6	27722064	C	T	0.2366	0.2709	2.439e-08	5.578	0.002935	2.754e-05	0.07138	0.2608	0.00209764	0.9707	0.00795273	intergenic	LINC01012;ENSG00000287252	dist=40579;dist=3131	.	.	y
12	rs7776351	6	27726731	C	T	0.2485	0.2882	3.87e-08	-5.497	0.01114	2.77e-05	0.08349	0.1398	0.00155543	0.8392	0.0266861	ncRNA_intronic	ENSG00000287252	.	.	.
12	rs7773070	6	27728827	C	T	0.2485	0.2882	4.766e-08	5.46	0.01626	2.997e-05	0.08568	0.1153	0.00164771	0.8601	0.0270057	ncRNA_exonic	ENSG00000287252	.	.	.
13	rs3815455	7	75611756	C	T	0.3032	0.2781	8.125e-09	-5.766	8.58e-06	0.0003676	0.01422	0.07902	0.181638	0.004729	0.492491	intronic	POR	.	.	.
13	rs41301394	7	75612803	C	T	0.2932	0.2709	7.641e-09	-5.776	3.688e-06	0.0003449	0.0135	0.04094	0.261453	0.01401	0.673767	intronic	POR	.	.	.
13	rs1057868	7	75615006	C	T	0.2952	0.2795	2.155e-08	-5.599	3.938e-06	0.0003962	0.01877	0.04871	0.195393	0.002969	0.525812	exonic	POR	.	nonsynonymous SNV	POR:ENST00000439269.1_1:exon7:c.C722T:p.A241V,POR:ENST00000706544.1_1:exon12:c.C1409T:p.A470V,POR:ENST00000394893.5_2:exon13:c.C1499T:p.A500V,POR:ENST00000461988.6_5:exon13:c.C1499T:p.A500V,POR:ENST00000475509.2_2:exon13:c.C1283T:p.A428V,POR:ENST00000706545.1_1:exon14:c.C1508T:p.A503V,POR:ENST00000706546.1_1:exon14:c.C1508T:p.A503V,POR:ENST00000706547.1_1:exon15:c.C1508T:p.A503V
13	rs17685	7	75616105	G	A	0.2893	0.2075	1.379e-08	-5.676	2.896e-06	5.712e-05	0.00873	0.03732	0.427716	0.01446	0.937332	UTR3	POR	ENST00000706544.1_1:c.*306G>A;ENST00000461988.6_5:c.*306G>A;ENST00000706545.1_1:c.*306G>A;ENST00000706546.1_1:c.*306G>A;ENST00000706547.1_1:c.*306G>A;ENST00000394893.5_2:c.*542G>A;ENST00000475509.2_2:c.*306G>A;ENST00000439269.1_1:c.*306G>A	.	.
13	rs8565	7	75630274	C	T	0.2873	0.3329	2.381e-09	-5.969	5.545e-05	3.76e-05	0.003036	0.04126	0.231029	0.01857	0.629784	exonic	STYXL1	.	synonymous SNV	STYXL1:ENST00000340062.9_5:exon6:c.A456A:p.Q152Q,STYXL1:ENST00000360591.7_5:exon6:c.A456A:p.Q152Q,STYXL1:ENST00000248600.5_4:exon8:c.A744A:p.Q248Q,STYXL1:ENST00000359697.8_6:exon8:c.A744A:p.Q248Q,STYXL1:ENST00000431581.5_4:exon8:c.A744A:p.Q248Q,STYXL1:ENST00000451157.1_4:exon8:c.A744A:p.Q248Q	y
13	rs3823882	7	75631913	C	T	0.2873	0.3329	3.597e-09	-5.902	5.495e-05	3.685e-05	0.003386	0.03956	0.244649	0.01744	0.633902	intronic	STYXL1	.	.	.
13	rs6978677	7	75636240	C	T	0.2873	0.3343	1.779e-08	-5.632	5.618e-05	3.751e-05	0.003432	0.04658	0.236346	0.01751	0.661815	intronic	STYXL1	.	.	.
14	rs2140619	7	114007270	G	A	0.4473	0.4971	2.651e-08	5.563	0.0002962	0.02171	0.0002319	0.3894	0.000413657	0.7877	0.113451	intronic	FOXP2	.	.	.	y
14	rs2396726	7	114021410	C	T	0.4423	0.5562	2.02e-08	-5.61	0.02024	0.1264	2.776e-05	0.0489	0.000120182	0.4649	0.714617	intronic	FOXP2	.	.	.
14	rs1989903	7	114137940	G	A	0.4771	0.3991	3.081e-12	-6.974	0.002233	0.06887	3.1e-08	0.002542	9.29544e-05	0.8891	0.26114	intronic	FOXP2	.	.	.	y
14	rs2189012	7	114211912	G	A	0.3757	0.2349	4.031e-08	5.49	0.07483	0.9654	2.099e-06	0.005825	0.0268269	0.4	0.164138	intronic	FOXP2	.	.	.
15	rs11772832	7	135073047	C	T	0.3966	0.4179	4.686e-09	-5.858	5.426e-05	1.529e-05	0.02223	0.7272	6.21298e-05	0.09315	0.647398	UTR3	CNOT4	ENST00000428680.6_6:c.*499G>A;ENST00000315544.6_6:c.*499G>A;ENST00000707064.1_1:c.*499G>A	.	.
15	rs3812281	7	135082751	C	T	0.3966	0.4207	1.837e-09	-6.012	8.472e-05	1.529e-05	0.01969	0.6826	5.99239e-05	0.1169	0.659447	intronic	CNOT4	.	.	.
15	rs2718167	7	135093445	C	T	0.3956	0.4207	3.457e-09	-5.908	5.615e-05	2.161e-05	0.007809	0.7015	6.30217e-05	0.09602	0.659317	intronic	CNOT4	.	.	.
15	rs2551778	7	135099649	C	T	0.3956	0.4193	2.803e-09	-5.943	5.661e-05	2.561e-05	0.009898	0.7471	6.52589e-05	0.08029	0.585724	intronic	CNOT4	.	.	.
15	rs2551777	7	135100476	C	T	0.3956	0.4193	1.238e-09	-6.075	4.809e-05	2.855e-05	0.008951	0.7583	6.25173e-05	0.07684	0.584902	intronic	CNOT4	.	.	.	y
15	rs2696880	7	135115138	G	A	0.3976	0.4193	3.876e-09	-5.889	5.818e-05	3.076e-05	0.01025	0.7558	7.65755e-05	0.1024	0.579463	intronic	CNOT4	.	.	.
15	rs2551774	7	135119417	G	A	0.3976	0.4207	7.365e-09	5.782	7.629e-05	3.426e-05	0.009858	0.809	5.72493e-05	0.1103	0.534917	intronic	CNOT4	.	.	.
15	rs2696881	7	135119831	C	T	0.3966	0.4207	1.996e-09	-5.998	6.562e-05	2.745e-05	0.00993	0.7507	6.61302e-05	0.1295	0.617897	intronic	CNOT4	.	.	.
15	rs2551773	7	135120196	G	A	0.3936	0.4193	2.478e-09	5.963	7.377e-05	3.013e-05	0.01042	0.7927	0.000126189	0.1057	0.58112	intronic	CNOT4	.	.	.
15	rs2551767	7	135139011	C	T	0.3966	0.4323	3.102e-09	-5.926	3.868e-05	1.995e-05	0.02702	0.6841	9.13335e-05	0.0529	0.792398	intronic	CNOT4	.	.	.
15	rs2551765	7	135142459	C	T	0.4046	0.4236	1.365e-08	-5.678	7.332e-05	7.44e-05	0.04197	0.6912	9.80054e-05	0.05312	0.630453	intronic	CNOT4	.	.	.
15	rs1559535	7	135143971	G	A	0.4046	0.4236	2.182e-08	-5.597	0.000169	7.459e-05	0.04532	0.675	8.90656e-05	0.07257	0.600027	intronic	CNOT4	.	.	.
15	rs2696884	7	135144662	C	T	0.3956	0.4179	5.003e-09	5.847	4.697e-05	2.468e-05	0.02897	0.7763	8.92689e-05	0.09877	0.599123	intronic	CNOT4	.	.	.
16	rs398715	9	17076686	C	T	0.2137	0.1859	1.833e-08	-5.627	5.023e-05	0.002593	0.001237	0.04533	0.128978	0.3388	0.671632	ncRNA_intronic	ENSG00000237153	.	.	.
16	rs405039	9	17076950	C	A	0.2137	0.1859	7.547e-09	5.778	5.469e-05	0.002594	0.001059	0.03503	0.134359	0.3374	0.659222	ncRNA_intronic	ENSG00000237153	.	.	.	y
17	rs2492051	9	127840721	C	T	0.3082	0.2075	4.636e-08	-5.465	0.1086	3.361e-07	0.04681	0.007201	0.0712377	0.9846	0.037266	intronic	SCAI	.	.	.
17	rs620529	9	127843943	C	A	0.3091	0.2075	3.872e-08	-5.497	0.5086	3.157e-07	0.04054	0.007075	0.0711967	0.9875	0.0372673	intronic	SCAI	.	.	.
17	rs591014	9	127843944	C	A	0.3091	0.2075	3.96e-08	-5.493	0.5167	3.157e-07	0.04054	0.007085	0.0711967	0.9875	0.0372673	intronic	SCAI	.	.	.
17	rs10986566	9	127873473	G	A	0.3082	0.2075	1.061e-10	-6.458	0.001078	1.292e-07	0.03823	0.005636	0.0692612	0.9441	0.043185	intronic	SCAI	.	.	.	y
17	rs7033815	9	127880264	G	T	0.3082	0.2075	2.537e-09	-5.959	0.001051	1.345e-07	0.03846	0.008069	0.0749514	0.8757	0.0432758	intronic	SCAI	.	.	.
17	rs6478694	9	127881004	G	A	0.3082	0.2061	2.407e-09	-5.968	0.001034	1.354e-07	0.03726	0.007979	0.0749514	0.8721	0.0431825	intronic	SCAI	.	.	.
17	rs35935349	9	127886094	C	T	0.3082	0.2075	1.174e-09	-6.084	0.000842	1.38e-07	0.03456	0.0073	0.0670857	0.8774	0.043182	intronic	SCAI	.	.	.
17	rs10819036	9	127890913	C	T	0.3082	0.2075	5.177e-10	6.214	0.0006361	1.395e-07	0.0426	0.007369	0.0749514	0.8458	0.043182	intronic	SCAI	.	.	.
17	rs4838249	9	127911031	G	A	0.3101	0.2089	1.271e-09	6.071	0.0003842	1.526e-07	0.03505	0.01024	0.0729306	0.9907	0.0453985	UTR3	PPP6C	ENST00000373547.9_5:c.*921C>T;ENST00000415905.5_4:c.*921C>T;ENST00000451402.5_4:c.*921C>T	.	.
17	rs7867749	9	127915210	C	T	0.3091	0.2017	1.141e-09	6.088	0.0003976	1.701e-07	0.0362	0.009158	0.073296	0.8815	0.0383054	intronic	PPP6C	.	.	.
17	rs4837011	9	127923014	G	T	0.3091	0.2089	3.068e-09	-5.928	0.0003493	1.575e-07	0.03589	0.1772	0.0729659	0.9683	0.043718	intronic	PPP6C	.	.	.
17	rs10986598	9	127926190	G	T	0.3091	0.2089	8.421e-10	-6.137	0.0003568	1.582e-07	0.02754	0.008245	0.078206	0.9961	0.0456495	intronic	PPP6C	.	.	.
17	rs4838252	9	127927268	G	A	0.3091	0.2089	1.197e-09	-6.081	0.0003418	1.585e-07	0.02724	0.008251	0.0745933	0.9966	0.0432741	intronic	PPP6C	.	.	.
17	rs10986600	9	127928735	C	T	0.3091	0.2089	1.261e-09	6.072	0.0004086	1.598e-07	0.0265	0.007942	0.0745933	0.9893	0.0434206	intronic	PPP6C	.	.	.
17	rs12380566	9	127929132	C	T	0.3082	0.2104	7.715e-10	-6.151	0.0004148	1.538e-07	0.02692	0.007448	0.0745933	0.994	0.0434911	intronic	PPP6C	.	.	.
17	rs420768	9	127959540	G	A	0.3101	0.2104	5.385e-10	6.207	0.0006236	1.581e-07	0.02983	0.00953	0.0794273	0.9838	0.0297634	intergenic	PPP6C;RABEPK	dist=7322;dist=3281	.	.
17	rs864882	9	127968109	C	T	0.3091	0.2032	9.668e-10	-6.115	0.0002897	2.345e-07	0.03516	0.01042	0.0728299	0.8787	0.0282904	intronic	RABEPK	.	.	.
17	rs500438	9	127970845	C	T	0.3171	0.2464	1.031e-09	-6.105	0.001137	1.94e-07	0.04775	0.01143	0.0806065	0.7793	0.0272359	intronic	RABEPK	.	.	.
18	rs1591660	10	110500212	C	T	0.2276	0.3184	3.503e-08	-5.514	4.699e-10	0.0002419	0.1708	0.5101	0.360954	0.3674	0.00221858	ncRNA_intronic	LINC02661	.	.	.	y
18	rs7894797	10	110503289	C	T	0.2276	0.3184	3.68e-08	5.506	4.502e-10	0.0002552	0.1742	0.5224	0.360557	0.3331	0.00222995	ncRNA_intronic	LINC02661	.	.	.
18	rs7083647	10	110515254	C	T	0.2296	0.3256	4.448e-08	-5.472	3.404e-10	0.0004939	0.154	0.523	0.344199	0.4335	0.00261482	ncRNA_intronic	LINC02661	.	.	.
18	rs7085695	10	110518474	C	T	0.2296	0.3256	4.996e-08	5.451	4.864e-10	0.0004278	0.1621	0.5194	0.349784	0.4319	0.00265649	ncRNA_intronic	LINC02661	.	.	.
18	rs6584898	10	110562799	G	A	0.2366	0.3372	4.608e-08	5.466	3.513e-10	0.0002221	0.1473	0.6431	0.318376	0.2787	0.0072147	ncRNA_intronic	LINC02661	.	.	.
19	rs4444109	11	112854309	G	T	0.2962	0.4236	1.785e-08	5.632	2.942e-05	1.177e-05	0.0573	0.03443	0.129707	0.2427	0.198299	intronic	NCAM1	.	.	.	y
19	rs4466874	11	112861434	C	T	0.4344	0.5029	6.74e-13	-7.185	4.223e-06	4.309e-07	0.001003	0.007351	0.0142797	0.3263	0.332826	intronic	NCAM1	.	.	.
19	rs4479020	11	112861443	G	A	0.4344	0.5043	3.655e-13	7.268	4.004e-06	3.824e-07	0.001038	0.00752	0.0142797	0.3025	0.296523	intronic	NCAM1	.	.	.
19	rs7115165	11	112862587	C	T	0.4344	0.5029	1.194e-12	-7.106	4.843e-06	4.204e-07	0.0009593	0.00728	0.0142797	0.3479	0.334685	intronic	NCAM1	.	.	.
19	rs7108081	11	112865115	G	A	0.4344	0.5029	1.891e-12	-7.042	5.804e-06	3.96e-07	0.0007895	0.007206	0.0142771	0.3121	0.334835	intronic	NCAM1	.	.	.
19	rs4381397	11	112866269	C	T	0.4344	0.5029	1.979e-12	-7.036	5.101e-06	4.245e-07	0.0008461	0.007343	0.0142801	0.3192	0.334658	intronic	NCAM1	.	.	.
19	rs4144892	11	112866456	C	T	0.4344	0.5029	1.833e-12	7.047	5.867e-06	3.745e-07	0.0008461	0.006629	0.0133021	0.3192	0.369347	intronic	NCAM1	.	.	.
19	rs1940702	11	112867061	G	A	0.4354	0.5029	1.954e-12	-7.038	5.354e-06	4.123e-07	0.0008365	0.007174	0.0142781	0.3236	0.334685	intronic	NCAM1	.	.	.
19	rs10891487	11	112869054	G	A	0.4364	0.5029	3.369e-13	7.279	4.756e-06	4.013e-07	0.0007719	0.007542	0.0142764	0.283	0.333889	intronic	NCAM1	.	.	.
19	rs1940701	11	112869404	C	T	0.4344	0.5029	4.127e-13	-7.251	3.268e-06	2.24e-07	0.001001	0.00767	0.0142781	0.3133	0.326303	intronic	NCAM1	.	.	.
19	rs723599	11	112872305	G	A	0.4344	0.5029	3.731e-13	-7.265	5.888e-06	3.958e-07	0.0007939	0.007005	0.0143288	0.3051	0.331155	intronic	NCAM1	.	.	.
19	rs7127930	11	112874645	C	A	0.4344	0.5029	1.861e-13	7.358	3.766e-06	4.275e-07	0.000838	0.00675	0.0143285	0.2903	0.330901	intronic	NCAM1	.	.	.
19	rs1940697	11	112876886	G	A	0.4344	0.5029	8.121e-13	7.159	6.158e-06	4.28e-07	0.0007707	0.006436	0.0143285	0.2174	0.331117	intronic	NCAM1	.	.	.
19	rs9919670	11	112877304	G	A	0.4354	0.5101	2.346e-13	7.327	5.213e-06	5.407e-07	0.0009909	0.006453	0.0143219	0.3727	0.331049	intronic	NCAM1	.	.	.
19	rs9919557	11	112877408	C	T	0.4344	0.5043	1.155e-12	-7.111	4.696e-06	4.437e-07	0.0007041	0.006899	0.0143285	0.2329	0.330918	intronic	NCAM1	.	.	.
19	rs7118907	11	112878254	C	A	0.4344	0.5043	1.11e-13	7.427	3.513e-06	3.834e-07	0.0008585	0.006779	0.0143285	0.2393	0.296414	intronic	NCAM1	.	.	.	y
19	rs7113596	11	112883761	C	A	0.4344	0.5029	2.097e-12	7.028	5.652e-06	4.551e-07	0.0007933	0.006707	0.0143285	0.2949	0.325693	intronic	NCAM1	.	.	.
20	rs10891544	11	113256152	C	A	0.4781	0.6945	3.012e-08	-5.541	0.004028	0.9409	0.0382	0.01608	2.49638e-06	0.6372	0.701538	intergenic	TTC12;ANKK1	dist=1886;dist=2349	.	.
20	rs11214594	11	113259332	G	A	0.4712	0.6902	2.084e-09	-5.991	0.001675	0.0002751	0.05503	0.004839	1.15157e-06	0.7939	0.370522	intronic	ANKK1	.	.	.
20	rs11214595	11	113259658	G	T	0.4712	0.6902	1.834e-09	-6.012	0.001752	0.0002725	0.05451	0.005413	6.96803e-07	0.7884	0.370614	intronic	ANKK1	.	.	.
20	rs17600713	11	113259947	G	A	0.4702	0.6902	1.922e-09	-6.004	0.00162	0.00027	0.0527	0.006037	6.99665e-07	0.7978	0.396605	intronic	ANKK1	.	.	.
20	rs34601878	11	113260898	G	A	0.4712	0.6902	4.677e-10	-6.23	0.001628	0.0002046	0.03925	0.005388	6.93346e-07	0.7441	0.370614	intronic	ANKK1	.	.	.
20	rs12360992	11	113262900	C	A	0.4682	0.6873	1.097e-09	6.095	0.001581	0.0001799	0.03997	0.006436	6.77174e-07	0.685	0.283224	intronic	ANKK1	.	.	.
20	rs35023999	11	113266411	C	A	0.496	0.6988	3.778e-13	7.263	3.191e-06	0.0004972	0.00845	0.01786	4.03962e-07	0.5057	0.170679	intronic	ANKK1	.	.	.
20	rs10891547	11	113267218	C	A	0.499	0.6974	1.953e-12	-7.038	4.899e-06	0.0003761	0.01108	0.01706	3.8249e-07	0.5177	0.160146	intronic	ANKK1	.	.	.
20	rs10891548	11	113267259	G	A	0.499	0.6974	2.146e-12	-7.025	5.045e-06	0.0003783	0.01109	0.01768	3.8249e-07	0.5177	0.172512	intronic	ANKK1	.	.	.
20	rs11604671	11	113268059	G	A	0.499	0.6974	2.011e-12	-7.034	7.135e-06	0.0004168	0.00984	0.01447	3.7436e-07	0.5316	0.167097	exonic	ANKK1	.	nonsynonymous SNV	ANKK1:ENST00000303941.4_3:exon6:c.G952A:p.G318R
20	rs2734849	11	113270160	G	A	0.496	0.6902	2.375e-12	7.01	7.035e-06	0.0003804	0.007148	0.03549	3.596e-07	0.3514	0.114097	exonic	ANKK1	.	synonymous SNV	ANKK1:ENST00000303941.4_3:exon8:c.A1469A:p.H490H
20	rs10891549	11	113278447	C	T	0.4543	0.67	1.405e-13	7.396	2.315e-06	5.024e-05	0.03269	0.008086	7.0749e-07	0.5191	0.103793	ncRNA_intronic	ENSG00000256757	.	.	.
20	rs1554929	11	113278764	C	T	0.4573	0.6801	3.84e-13	-7.261	2.902e-06	7.398e-05	0.03905	0.006822	7.86013e-07	0.5943	0.224739	ncRNA_intronic	ENSG00000256757	.	.	.
20	rs11214603	11	113279922	G	A	0.4563	0.6787	1.749e-13	-7.367	2.155e-06	4.926e-05	0.0337	0.007598	7.59259e-07	0.6318	0.152743	ncRNA_intronic	ENSG00000256757	.	.	.
20	rs6277	11	113283459	G	A	0.4563	0.6744	3.008e-13	-7.294	1.088e-06	4.558e-05	0.06524	0.007326	7.7931e-07	0.4987	0.133997	exonic	DRD2	.	synonymous SNV	DRD2:ENST00000346454.7_7:exon6:c.C870C:p.P290P,DRD2:ENST00000542968.5_8:exon6:c.C957C:p.P319P,DRD2:ENST00000544518.5_4:exon6:c.C954C:p.P318P,DRD2:ENST00000362072.8_10:exon7:c.C957C:p.P319P,DRD2:ENST00000538967.5_4:exon7:c.C963C:p.P321P
20	rs12363125	11	113285916	C	T	0.3877	0.6282	6.709e-16	-8.076	1.904e-07	3.003e-05	0.01146	0.004523	1.86496e-07	0.1747	0.103822	intronic	DRD2	.	.	.	y
20	rs2734839	11	113286490	C	T	0.3867	0.611	1.07e-15	-8.019	3.175e-07	3.9e-05	0.01034	0.004776	1.69664e-07	0.2067	0.109269	intronic	DRD2	.	.	.
20	rs2734838	11	113286501	G	A	0.3877	0.6239	9.354e-16	8.035	1.927e-07	2.789e-05	0.01266	0.004574	1.69422e-07	0.2368	0.142554	intronic	DRD2	.	.	.
20	rs2734837	11	113286829	C	T	0.3867	0.611	1.167e-15	-8.008	3.064e-07	3.888e-05	0.01046	0.005314	1.69652e-07	0.1508	0.108253	intronic	DRD2	.	.	.
20	rs1107162	11	113289037	G	A	0.3877	0.6239	1.084e-15	-8.017	2.348e-07	2.82e-05	0.01376	0.005049	1.69602e-07	0.1613	0.141839	intronic	DRD2	.	.	.
20	rs2734835	11	113291343	G	T	0.3867	0.6268	1.308e-15	7.994	4.099e-07	3.985e-05	0.01267	0.004631	1.33829e-07	0.1018	0.132751	intronic	DRD2	.	.	.
20	rs1800498	11	113291588	G	A	0.3867	0.6225	1.465e-15	-7.98	4.245e-07	3.058e-05	0.01354	0.005134	1.01018e-07	0.1607	0.155382	intronic	DRD2	.	.	.
20	rs2734833	11	113292920	G	A	0.3867	0.6182	1.176e-15	-8.007	5.375e-07	3.1e-05	0.01216	0.003758	2.30861e-07	0.1336	0.110288	intronic	DRD2	.	.	.
20	rs2734832	11	113293501	G	A	0.3867	0.6268	6.888e-16	8.072	3.733e-07	3.465e-05	0.01187	0.003796	1.02419e-07	0.1077	0.141377	intronic	DRD2	.	.	.
20	rs2734831	11	113293596	G	T	0.3867	0.6254	7.284e-16	8.066	3.804e-07	3.466e-05	0.01241	0.003779	1.02407e-07	0.1068	0.140211	intronic	DRD2	.	.	.
20	rs11608185	11	113294976	C	T	0.3877	0.6225	1.429e-15	7.983	4.712e-07	2.962e-05	0.01298	0.004506	9.84283e-08	0.1763	0.183045	intronic	DRD2	.	.	.
20	rs1076563	11	113295909	C	A	0.3877	0.6239	2.159e-15	7.932	4.275e-07	3.468e-05	0.01282	0.006769	1.31883e-07	0.1863	0.154182	intronic	DRD2	.	.	.
20	rs1116313	11	113296107	G	A	0.3877	0.6239	1.415e-15	7.984	4.699e-07	3.407e-05	0.01242	0.004721	1.30608e-07	0.1753	0.145297	intronic	DRD2	.	.	.
20	rs12798900	11	113298996	G	T	0.3946	0.6311	6.194e-15	-7.8	2.864e-07	5.281e-05	0.02075	0.002446	8.4155e-07	0.1086	0.111902	intronic	DRD2	.	.	.
20	rs7131627	11	113299829	G	A	0.3946	0.6268	3.379e-15	-7.876	4.18e-07	7.058e-05	0.02219	0.002536	8.61271e-07	0.1254	0.0742926	intronic	DRD2	.	.	.
20	rs7131440	11	113299910	C	T	0.3946	0.6268	3.118e-15	-7.886	4.27e-07	7.071e-05	0.02199	0.002314	8.6149e-07	0.1255	0.0747111	intronic	DRD2	.	.	.
20	rs7131465	11	113300022	C	A	0.3946	0.6268	4.581e-15	7.838	3.905e-07	6.922e-05	0.02309	0.002509	8.63615e-07	0.124	0.0762612	intronic	DRD2	.	.	.
20	rs7131681	11	113300052	C	T	0.3946	0.6268	4.233e-15	-7.848	4.028e-07	7.278e-05	0.02189	0.002342	8.61549e-07	0.1252	0.0758232	intronic	DRD2	.	.	.
20	rs11214605	11	113300601	C	T	0.3946	0.6311	4.333e-15	-7.845	3.461e-07	5.752e-05	0.02454	0.002371	8.61331e-07	0.1045	0.109481	intronic	DRD2	.	.	.
20	rs12800853	11	113302514	C	T	0.3946	0.634	1.249e-15	-7.999	1.73e-07	8.588e-05	0.01688	0.002216	7.21373e-07	0.09219	0.189376	intronic	DRD2	.	.	.
20	rs4938017	11	113303929	C	T	0.3857	0.6095	9.833e-16	8.029	1.044e-06	5.812e-05	0.0143	0.005162	1.18187e-07	0.1103	0.180824	intronic	DRD2	.	.	.
20	rs7122246	11	113304457	G	A	0.3867	0.6311	4.392e-15	-7.843	1.344e-06	0.0001262	0.01424	0.004635	1.23883e-07	0.0939	0.168994	intronic	DRD2	.	.	.
20	rs12364051	11	113305314	G	A	0.3847	0.6225	7.743e-15	7.772	1.004e-06	0.0001032	0.01478	0.004301	1.27295e-07	0.1106	0.0864321	intronic	DRD2	.	.	.
20	rs4587762	11	113306893	G	A	0.3857	0.6297	5.935e-15	-7.805	9.864e-07	0.0001012	0.02423	0.006738	7.75622e-08	0.1213	0.147057	intronic	DRD2	.	.	.
20	rs4245150	11	113364647	G	T	0.3618	0.3012	2.348e-13	7.327	1.83e-13	0.003769	0.1367	0.0001207	0.00417475	0.02428	0.115634	intergenic	DRD2;TMPRSS5	dist=18527;dist=193622	.	.
20	rs17602038	11	113364691	C	T	0.3618	0.2954	1.469e-13	7.39	1.059e-13	0.003434	0.1353	4.744e-05	0.00420233	0.01976	0.0827573	intergenic	DRD2;TMPRSS5	dist=18571;dist=193578	.	.
20	rs4938021	11	113364803	C	T	0.3618	0.3012	9.551e-14	7.447	1.096e-13	0.003586	0.1381	4.732e-05	0.00371706	0.02428	0.12627	intergenic	DRD2;TMPRSS5	dist=18683;dist=193466	.	.
20	rs4936275	11	113365084	C	T	0.3618	0.3012	9.35e-14	7.45	1.081e-13	0.003611	0.1375	4.663e-05	0.00371826	0.02428	0.124833	intergenic	DRD2;TMPRSS5	dist=18964;dist=193185	.	.
20	rs61902811	11	113370758	G	A	0.3588	0.2867	1.157e-13	-7.422	1.202e-12	0.005943	0.1795	3.066e-05	0.00531569	0.01381	0.109602	intergenic	DRD2;TMPRSS5	dist=24638;dist=187511	.	.
20	rs7934649	11	113372671	C	T	0.3588	0.2939	1.686e-13	7.372	1.189e-12	0.006873	0.1797	2.877e-05	0.00531312	0.01569	0.176992	intergenic	DRD2;TMPRSS5	dist=26551;dist=185598	.	.
20	rs6589379	11	113374567	G	T	0.3588	0.2939	1.429e-13	7.394	1.008e-12	0.006844	0.1733	2.689e-05	0.00532476	0.0165	0.177384	intergenic	DRD2;TMPRSS5	dist=28447;dist=183702	.	.
20	rs4938023	11	113374847	G	T	0.3588	0.2925	2.661e-13	-7.311	1.272e-12	0.007073	0.1709	2.997e-05	0.00532427	0.01885	0.162261	intergenic	DRD2;TMPRSS5	dist=28727;dist=183422	.	.
20	rs7111031	11	113377488	C	A	0.3588	0.2925	1.426e-13	7.394	1.683e-12	0.007146	0.1654	3.509e-05	0.00501256	0.01894	0.162345	intergenic	DRD2;TMPRSS5	dist=31368;dist=180781	.	.
20	rs6589381	11	113378952	C	A	0.4145	0.3991	3.375e-09	-5.912	1.643e-07	0.01139	0.4263	0.0004722	0.0172096	0.008109	0.210744	intergenic	DRD2;TMPRSS5	dist=32832;dist=179317	.	.
20	rs7949802	11	113381832	C	T	0.4155	0.3991	5.581e-09	-5.829	1.28e-07	0.01017	0.432	0.0003319	0.0174329	0.007798	0.210319	intergenic	DRD2;TMPRSS5	dist=35712;dist=176437	.	.
20	rs4479021	11	113383394	G	A	0.4155	0.3905	2.619e-09	-5.954	1.34e-07	0.01154	0.4171	0.0004213	0.0176567	0.006567	0.196895	intergenic	DRD2;TMPRSS5	dist=37274;dist=174875	.	.
20	rs7107293	11	113384111	G	A	0.4155	0.3847	2.704e-09	-5.949	1.212e-07	0.01182	0.4246	0.0004693	0.0161763	0.005486	0.219426	intergenic	DRD2;TMPRSS5	dist=37991;dist=174158	.	.
20	rs4534613	11	113386043	C	A	0.4155	0.389	1.948e-09	6.002	1.663e-07	0.01129	0.409	0.0005213	0.0161317	0.01095	0.199587	intergenic	DRD2;TMPRSS5	dist=39923;dist=172226	.	.	y
20	rs35738585	11	113386347	G	T	0.4155	0.389	2.306e-09	5.975	1.818e-07	0.01197	0.4158	0.0005467	0.0161399	0.01183	0.200296	intergenic	DRD2;TMPRSS5	dist=40227;dist=171922	.	.
20	rs34216353	11	113386391	C	T	0.4155	0.389	2.295e-09	-5.975	1.82e-07	0.01197	0.4157	0.0005427	0.016131	0.01186	0.200229	intergenic	DRD2;TMPRSS5	dist=40271;dist=171878	.	.
20	rs4245154	11	113388674	G	A	0.4155	0.389	3.63e-09	5.9	2.011e-07	0.006916	0.3254	0.0007335	0.0161083	0.01746	0.256313	intergenic	DRD2;TMPRSS5	dist=42554;dist=169595	.	.
20	rs2514218	11	113392994	C	T	0.3519	0.2853	2.259e-14	-7.635	7.588e-12	0.001636	0.08041	0.0001422	0.00252744	0.01292	0.144843	intergenic	DRD2;TMPRSS5	dist=46874;dist=165275	.	.
20	rs12420205	11	113394035	C	T	0.3091	0.2968	3.161e-15	7.884	2.405e-10	0.004208	0.006428	0.0002525	0.00338673	0.03755	0.139978	intergenic	DRD2;TMPRSS5	dist=47915;dist=164234	.	.	y
20	rs4936277	11	113431960	G	A	0.4225	0.4323	3.881e-16	8.142	7.672e-12	0.005734	0.05144	0.0004639	1.75327e-05	0.000436	0.135035	intergenic	DRD2;TMPRSS5	dist=85840;dist=126309	.	.	y
20	rs7125588	11	113436072	G	A	0.4085	0.4193	2.341e-15	7.922	1.045e-13	0.002683	0.0534	0.0008884	6.03601e-06	0.0008877	0.137914	intergenic	DRD2;TMPRSS5	dist=89952;dist=122197	.	.
20	rs7933981	11	113438068	G	A	0.4085	0.4222	4.479e-16	-8.125	8.911e-14	0.001314	0.04204	0.0009882	6.90431e-06	0.0006164	0.12433	intergenic	DRD2;TMPRSS5	dist=91948;dist=120201	.	.
20	rs61687445	11	113438092	C	A	0.4095	0.4222	3.919e-16	-8.141	7.742e-14	0.001336	0.03818	0.00102	6.02102e-06	0.0008254	0.135089	intergenic	DRD2;TMPRSS5	dist=91972;dist=120177	.	.
20	rs7101666	11	113442336	C	T	0.499	0.4957	1.832e-13	-7.361	8.897e-09	0.02397	0.0323	0.001194	4.12401e-05	0.001142	0.207292	intergenic	DRD2;TMPRSS5	dist=96216;dist=115933	.	.
20	rs6589386	11	113443753	C	T	0.4085	0.4207	4.848e-16	-8.115	5.882e-14	0.001428	0.04526	0.000774	6.05397e-06	0.0006101	0.101486	intergenic	DRD2;TMPRSS5	dist=97633;dist=114516	.	.
20	rs73004038	11	113475283	G	A	0.09841	0.1009	2.728e-09	5.947	2.008e-06	0.004051	0.0273	0.253	0.00400562	0.01317	0.0609122	intergenic	DRD2;TMPRSS5	dist=129163;dist=82986	.	.	y
20	rs17603387	11	113477587	C	T	0.09841	0.1023	3.427e-09	-5.91	1.691e-06	0.004234	0.02898	0.2401	0.00400544	0.01432	0.0609563	intergenic	DRD2;TMPRSS5	dist=131467;dist=80682	.	.
20	rs55751957	11	113485326	G	T	0.09841	0.1023	2.963e-09	5.934	1.653e-06	0.004337	0.03207	0.2398	0.0040035	0.0103	0.0609563	intergenic	DRD2;TMPRSS5	dist=139206;dist=72943	.	.
20	rs56080111	11	113503067	C	T	0.0994	0.0937	1.245e-08	5.693	3.148e-06	0.003871	0.0371	0.2765	0.00438925	0.01907	0.0681852	intergenic	DRD2;TMPRSS5	dist=156947;dist=55202	.	.
20	rs17531898	11	113507087	C	T	0.09841	0.0893	1.26e-08	-5.691	3.212e-06	0.00387	0.02203	0.3079	0.00421667	0.02387	0.0521057	intergenic	DRD2;TMPRSS5	dist=160967;dist=51182	.	.
20	rs61904979	11	113508088	G	A	0.09841	0.0879	9.034e-09	5.748	2.793e-06	0.003795	0.02102	0.349	0.00405313	0.02124	0.0515027	intergenic	DRD2;TMPRSS5	dist=161968;dist=50181	.	.
20	rs61904980	11	113508204	C	T	0.0994	0.0922	9.136e-09	-5.746	2.567e-06	0.003473	0.02308	0.3478	0.00404436	0.01982	0.057699	intergenic	DRD2;TMPRSS5	dist=162084;dist=50065	.	.
20	rs61904981	11	113508292	G	T	0.09841	0.0879	6.794e-09	-5.796	2.624e-06	0.003847	0.02255	0.3564	0.00403962	0.02124	0.0517948	intergenic	DRD2;TMPRSS5	dist=162172;dist=49977	.	.
20	rs61904982	11	113508452	C	T	0.0994	0.0922	9.112e-09	5.746	2.518e-06	0.003469	0.02363	0.3455	0.00400793	0.01982	0.057699	intergenic	DRD2;TMPRSS5	dist=162332;dist=49817	.	.
20	rs61904983	11	113511327	C	A	0.0994	0.0908	2.182e-08	-5.597	3.598e-06	0.002948	0.0268	0.4209	0.00204894	0.02191	0.0550002	intergenic	DRD2;TMPRSS5	dist=165207;dist=46942	.	.
20	rs55637702	11	113516211	C	T	0.1014	0.0937	1.799e-08	-5.63	1.548e-05	0.002295	0.02135	0.4149	0.00185421	0.02485	0.0527811	intergenic	DRD2;TMPRSS5	dist=170091;dist=42058	.	.
20	rs17532157	11	113516770	G	T	0.1004	0.0937	5.346e-09	5.836	1.525e-05	0.002251	0.02145	0.4124	0.00182873	0.02657	0.0527811	intergenic	DRD2;TMPRSS5	dist=170650;dist=41499	.	.
20	rs61904986	11	113517002	C	T	0.1004	0.0937	5.545e-09	-5.83	1.647e-05	0.002308	0.02241	0.3996	0.00179432	0.02657	0.0526685	intergenic	DRD2;TMPRSS5	dist=170882;dist=41267	.	.
20	rs17532254	11	113518935	G	A	0.1014	0.0937	5.085e-09	-5.844	1.188e-05	0.002181	0.02679	0.4015	0.00166694	0.02401	0.0529279	intergenic	DRD2;TMPRSS5	dist=172815;dist=39334	.	.
20	rs61904989	11	113519463	C	T	0.1014	0.0937	1.833e-08	5.627	1.12e-05	0.006187	0.0268	0.3962	0.00175792	0.02618	0.0504094	intergenic	DRD2;TMPRSS5	dist=173343;dist=38806	.	.
20	rs11606711	11	113519920	G	A	0.1014	0.0937	1.126e-08	5.711	1.067e-05	0.002181	0.02777	0.3701	0.00175792	0.03259	0.0529279	intergenic	DRD2;TMPRSS5	dist=173800;dist=38349	.	.
20	rs11606734	11	113520060	G	A	0.1014	0.0937	1.247e-08	5.693	1.041e-05	0.002178	0.02748	0.3964	0.00175792	0.03542	0.0529279	intergenic	DRD2;TMPRSS5	dist=173940;dist=38209	.	.
20	rs11602504	11	113520122	G	A	0.1014	0.0937	1.22e-08	-5.697	1.026e-05	0.002173	0.02774	0.3906	0.00175792	0.03555	0.0529279	intergenic	DRD2;TMPRSS5	dist=174002;dist=38147	.	.
20	rs61904990	11	113520959	C	T	0.1014	0.0951	1.142e-08	5.708	1.182e-05	0.002287	0.02751	0.4008	0.00175784	0.05404	0.0525352	intergenic	DRD2;TMPRSS5	dist=174839;dist=37310	.	.
20	rs17532375	11	113521607	G	A	0.1014	0.0937	1.435e-08	5.669	1.215e-05	0.002133	0.02974	0.3971	0.00175784	0.03506	0.0529279	intergenic	DRD2;TMPRSS5	dist=175487;dist=36662	.	.
20	rs61904991	11	113521667	G	A	0.1014	0.0937	1.416e-08	5.671	1.21e-05	0.002133	0.02974	0.3942	0.00175784	0.03506	0.0529279	intergenic	DRD2;TMPRSS5	dist=175547;dist=36602	.	.
20	rs11601729	11	113522020	C	T	0.1014	0.0937	1.446e-08	-5.668	1.32e-05	0.002133	0.02944	0.3941	0.00175784	0.03319	0.0529279	intergenic	DRD2;TMPRSS5	dist=175900;dist=36249	.	.
20	rs17610915	11	113522590	C	T	0.1014	0.0937	1.343e-08	-5.68	1.186e-05	0.002133	0.02939	0.3943	0.00171167	0.03241	0.0529279	intergenic	DRD2;TMPRSS5	dist=176470;dist=35679	.	.
20	rs61904993	11	113522952	C	A	0.1014	0.0937	1.055e-08	5.722	1.508e-05	0.002271	0.02954	0.3548	0.00175788	0.03294	0.0568649	intergenic	DRD2;TMPRSS5	dist=176832;dist=35317	.	.
20	rs17532479	11	113522981	C	T	0.1014	0.0937	1.055e-08	-5.722	1.517e-05	0.002271	0.02954	0.3542	0.00175788	0.03294	0.0568649	intergenic	DRD2;TMPRSS5	dist=176861;dist=35288	.	.
20	rs61904994	11	113523054	G	T	0.1014	0.0937	1.39e-08	-5.675	1.144e-05	0.002271	0.02954	0.3863	0.00175788	0.03176	0.0568649	intergenic	DRD2;TMPRSS5	dist=176934;dist=35215	.	.
20	rs11600717	11	113523862	G	A	0.1014	0.0937	1.369e-08	5.677	1.099e-05	0.002271	0.03013	0.385	0.0017576	0.03017	0.0568649	intergenic	DRD2;TMPRSS5	dist=177742;dist=34407	.	.
20	rs11602934	11	113524147	C	T	0.1014	0.0937	1.741e-08	-5.636	1.101e-05	0.003197	0.0306	0.3874	0.00175748	0.03017	0.0531628	intergenic	DRD2;TMPRSS5	dist=178027;dist=34122	.	.
20	rs11604889	11	113524197	G	A	0.1014	0.0937	1.713e-08	-5.639	1.076e-05	0.003197	0.0306	0.3861	0.00175748	0.03017	0.0531628	intergenic	DRD2;TMPRSS5	dist=178077;dist=34072	.	.
20	rs11600745	11	113524206	C	T	0.1014	0.0937	1.85e-08	5.625	1.142e-05	0.003197	0.03085	0.3962	0.00175748	0.03017	0.0531628	intergenic	DRD2;TMPRSS5	dist=178086;dist=34063	.	.
20	rs61904996	11	113524462	G	A	0.1004	0.0937	7.242e-09	-5.785	1.037e-05	0.002311	0.03268	0.3424	0.00175756	0.02822	0.0580401	intergenic	DRD2;TMPRSS5	dist=178342;dist=33807	.	.
20	rs61904997	11	113524465	C	T	0.1004	0.0937	7.603e-09	5.777	1.119e-05	0.002311	0.03268	0.3447	0.00175756	0.02822	0.0580401	intergenic	DRD2;TMPRSS5	dist=178345;dist=33804	.	.
20	rs61904998	11	113524487	C	T	0.1004	0.0937	9.592e-09	-5.738	9.656e-06	0.002311	0.03073	0.3775	0.00175756	0.0283	0.0580401	intergenic	DRD2;TMPRSS5	dist=178367;dist=33782	.	.
20	rs61904999	11	113524722	G	A	0.1014	0.0937	1.516e-08	-5.66	1.354e-05	0.002229	0.03057	0.3866	0.00175756	0.02872	0.0568649	intergenic	DRD2;TMPRSS5	dist=178602;dist=33547	.	.
20	rs111365410	11	113524787	C	A	0.1014	0.0937	1.519e-08	5.659	1.36e-05	0.002229	0.0306	0.3867	0.00175756	0.02849	0.0568649	intergenic	DRD2;TMPRSS5	dist=178667;dist=33482	.	.
20	rs73004093	11	113525169	C	T	0.1014	0.0937	1.404e-08	5.673	1.186e-05	0.002229	0.03061	0.3869	0.00175756	0.02659	0.0568649	intergenic	DRD2;TMPRSS5	dist=179049;dist=33100	.	.
20	rs73004095	11	113525268	C	T	0.1014	0.0937	1.356e-08	5.679	1.18e-05	0.002225	0.03037	0.3872	0.00175756	0.02659	0.0527908	intergenic	DRD2;TMPRSS5	dist=179148;dist=33001	.	.
20	rs111614192	11	113525585	G	A	0.1034	0.0994	9.226e-09	5.744	1.241e-05	0.002301	0.02977	0.401	0.00171431	0.01196	0.049419	intergenic	DRD2;TMPRSS5	dist=179465;dist=32684	.	.
20	rs113959352	11	113525629	C	T	0.1014	0.0937	1.002e-08	-5.73	1.176e-05	0.002229	0.0301	0.3867	0.00175756	0.02304	0.0568649	intergenic	DRD2;TMPRSS5	dist=179509;dist=32640	.	.
20	rs112771260	11	113525659	G	A	0.1014	0.0937	1.017e-08	-5.728	1.19e-05	0.002229	0.0301	0.3907	0.00174735	0.02263	0.0568649	intergenic	DRD2;TMPRSS5	dist=179539;dist=32610	.	.
20	rs61905000	11	113525762	C	T	0.1014	0.0937	9.086e-09	-5.747	1.171e-05	0.002229	0.02877	0.375	0.00175958	0.02279	0.0568649	intergenic	DRD2;TMPRSS5	dist=179642;dist=32507	.	.
20	rs61905001	11	113525917	C	T	0.1014	0.0937	9.904e-09	5.732	1.154e-05	0.002229	0.03043	0.3874	0.00175756	0.02114	0.0568649	intergenic	DRD2;TMPRSS5	dist=179797;dist=32352	.	.
20	rs11601890	11	113526148	C	T	0.1014	0.0937	9.856e-09	5.733	1.182e-05	0.002227	0.03043	0.3875	0.00171132	0.02114	0.0568326	intergenic	DRD2;TMPRSS5	dist=180028;dist=32121	.	.
20	rs11607594	11	113526551	C	T	0.1014	0.0937	1.326e-08	5.683	1.21e-05	0.002218	0.02971	0.424	0.00175691	0.01968	0.0568649	intergenic	DRD2;TMPRSS5	dist=180431;dist=31718	.	.
20	rs73004098	11	113526612	G	A	0.1014	0.0937	2.284e-08	5.589	1.377e-05	0.002018	0.02926	0.3444	0.00175691	0.01968	0.0569052	intergenic	DRD2;TMPRSS5	dist=180492;dist=31657	.	.
20	rs73004100	11	113526650	G	A	0.1014	0.0937	2.13e-08	5.601	1.444e-05	0.002218	0.02949	0.3006	0.00175691	0.02309	0.0568649	intergenic	DRD2;TMPRSS5	dist=180530;dist=31619	.	.
20	rs11607622	11	113526665	C	T	0.1014	0.0937	2.688e-08	5.561	1.371e-05	0.002218	0.02949	0.3603	0.00176088	0.02309	0.0568649	intergenic	DRD2;TMPRSS5	dist=180545;dist=31604	.	.
20	rs11603529	11	113527066	G	A	0.1014	0.0937	1.138e-08	-5.709	1.196e-05	0.002221	0.03066	0.4119	0.00175707	0.02309	0.0568649	intergenic	DRD2;TMPRSS5	dist=180946;dist=31203	.	.
20	rs11603532	11	113527096	G	A	0.1014	0.0937	1.157e-08	-5.706	1.214e-05	0.002221	0.03088	0.4134	0.00175707	0.02262	0.0568649	intergenic	DRD2;TMPRSS5	dist=180976;dist=31173	.	.
20	rs11607747	11	113527201	G	A	0.1014	0.0937	1.213e-08	5.698	1.41e-05	0.002225	0.03081	0.4068	0.00175707	0.02262	0.0568649	intergenic	DRD2;TMPRSS5	dist=181081;dist=31068	.	.
20	rs11608194	11	113527502	G	A	0.1014	0.0937	1.209e-08	5.698	1.402e-05	0.002222	0.0308	0.407	0.00175707	0.02262	0.0568326	intergenic	DRD2;TMPRSS5	dist=181382;dist=30767	.	.
20	rs11602079	11	113527535	C	T	0.1014	0.0937	5.176e-09	-5.841	3.186e-05	0.002174	0.04423	0.7258	0.00175707	0.03413	0.0568649	intergenic	DRD2;TMPRSS5	dist=181415;dist=30734	.	.
20	rs11603480	11	113533737	G	A	0.1034	0.0994	1.15e-08	5.707	1.479e-05	0.002106	0.02877	0.4296	0.0017576	0.01698	0.0507068	intergenic	DRD2;TMPRSS5	dist=187617;dist=24532	.	.
20	rs73005905	11	113534413	C	T	0.1014	0.0937	1.177e-08	-5.703	1.363e-05	0.002238	0.02926	0.4089	0.0017576	0.02567	0.0569567	intergenic	DRD2;TMPRSS5	dist=188293;dist=23856	.	.
20	rs61905027	11	113534482	C	T	0.1014	0.0937	1.176e-08	5.703	1.374e-05	0.002241	0.0291	0.4089	0.0017576	0.02567	0.0569567	intergenic	DRD2;TMPRSS5	dist=188362;dist=23787	.	.
20	rs61905028	11	113534541	C	T	0.1014	0.0937	1.177e-08	-5.703	1.378e-05	0.002241	0.0291	0.4089	0.0017576	0.02567	0.0568649	intergenic	DRD2;TMPRSS5	dist=188421;dist=23728	.	.
20	rs73005911	11	113535187	C	T	0.1014	0.0937	1.103e-08	-5.714	1.301e-05	0.002241	0.02892	0.4089	0.00167263	0.02567	0.0568649	intergenic	DRD2;TMPRSS5	dist=189067;dist=23082	.	.
20	rs73005913	11	113535220	G	A	0.1014	0.0937	1.142e-08	5.708	1.315e-05	0.002241	0.02891	0.4089	0.0017576	0.02567	0.0568649	intergenic	DRD2;TMPRSS5	dist=189100;dist=23049	.	.
20	rs61905029	11	113535515	C	A	0.1014	0.0951	1.118e-08	5.712	1.289e-05	0.002241	0.02848	0.4089	0.0017576	0.02612	0.0568649	intergenic	DRD2;TMPRSS5	dist=189395;dist=22754	.	.
20	rs61905030	11	113535683	G	A	0.1014	0.0937	1.093e-08	-5.716	1.24e-05	0.002239	0.02858	0.4091	0.0017576	0.02522	0.0568326	intergenic	DRD2;TMPRSS5	dist=189563;dist=22586	.	.
20	rs61905031	11	113536664	C	T	0.1014	0.0937	1.113e-08	5.713	1.293e-05	0.002241	0.02859	0.4089	0.0017555	0.02483	0.0568649	intergenic	DRD2;TMPRSS5	dist=190544;dist=21605	.	.
20	rs11606746	11	113537310	G	A	0.1024	0.0937	1.027e-08	-5.726	1.372e-05	0.002536	0.02782	0.4117	0.00175736	0.02462	0.0551257	intergenic	DRD2;TMPRSS5	dist=191190;dist=20959	.	.
20	rs55820082	11	113537972	G	A	0.1014	0.0937	9.509e-09	5.739	1.34e-05	0.002244	0.02802	0.4113	0.00176145	0.02497	0.0568649	intergenic	DRD2;TMPRSS5	dist=191852;dist=20297	.	.
20	rs56137735	11	113538253	G	T	0.1014	0.0937	1.087e-08	5.716	1.271e-05	0.002244	0.02805	0.4095	0.00175655	0.02497	0.0568649	intergenic	DRD2;TMPRSS5	dist=192133;dist=20016	.	.
20	rs55779036	11	113538828	G	A	0.1014	0.0937	9.558e-09	5.738	1.123e-05	0.002204	0.027	0.4089	0.0017561	0.02439	0.0554978	intergenic	DRD2;TMPRSS5	dist=192708;dist=19441	.	.
20	rs61905034	11	113539183	G	A	0.1014	0.0937	9.258e-09	-5.744	1.099e-05	0.002193	0.027	0.407	0.00175368	0.02409	0.0543797	intergenic	DRD2;TMPRSS5	dist=193063;dist=19086	.	.
20	rs35391416	11	113539373	G	A	0.1014	0.0937	9.469e-09	-5.74	1.097e-05	0.002186	0.02697	0.4098	0.00175453	0.02409	0.0568649	intergenic	DRD2;TMPRSS5	dist=193253;dist=18896	.	.
20	rs55786643	11	113539588	C	T	0.1014	0.0937	8.033e-09	-5.768	1.074e-05	0.002186	0.02706	0.4134	0.00175061	0.02409	0.0568649	intergenic	DRD2;TMPRSS5	dist=193468;dist=18681	.	.
20	rs61905037	11	113540096	C	T	0.1014	0.0937	7.768e-09	-5.773	1.1e-05	0.002186	0.02702	0.4042	0.00174643	0.0234	0.0568649	intergenic	DRD2;TMPRSS5	dist=193976;dist=18173	.	.
20	rs34469764	11	113540263	G	A	0.1014	0.0937	8.666e-09	5.755	1.118e-05	0.002183	0.02743	0.3742	0.00174647	0.0234	0.0568326	intergenic	DRD2;TMPRSS5	dist=194143;dist=18006	.	.
20	rs34531299	11	113540329	G	A	0.1014	0.0937	7.37e-09	-5.782	1.076e-05	0.002183	0.02685	0.4004	0.00169555	0.0234	0.0568326	intergenic	DRD2;TMPRSS5	dist=194209;dist=17940	.	.
20	rs1355202	11	113541021	C	T	0.1014	0.0937	9.58e-09	5.738	1.086e-05	0.002183	0.02698	0.4076	0.00174056	0.02443	0.0568326	intergenic	DRD2;TMPRSS5	dist=194901;dist=17248	.	.
20	rs2363550	11	113541255	G	A	0.1014	0.0937	9.905e-09	-5.732	1.121e-05	0.002183	0.02696	0.4093	0.00173988	0.02443	0.0568326	intergenic	DRD2;TMPRSS5	dist=195135;dist=17014	.	.
20	rs11605078	11	113541994	C	T	0.1014	0.0937	9.594e-09	5.738	1.086e-05	0.002175	0.02615	0.4135	0.00173604	0.02461	0.0568326	intergenic	DRD2;TMPRSS5	dist=195874;dist=16275	.	.
20	rs11605119	11	113542109	G	A	0.1014	0.0937	1.062e-08	5.72	1.239e-05	0.002175	0.02616	0.4229	0.00173029	0.02478	0.0568326	intergenic	DRD2;TMPRSS5	dist=195989;dist=16160	.	.
20	rs11605096	11	113542110	C	A	0.1014	0.0937	1.064e-08	5.72	1.242e-05	0.002175	0.02616	0.4229	0.00173029	0.02478	0.0568326	intergenic	DRD2;TMPRSS5	dist=195990;dist=16159	.	.
20	rs11600908	11	113542171	G	A	0.1014	0.0937	9.665e-09	-5.737	1.046e-05	0.002183	0.02616	0.4235	0.00172978	0.02478	0.0543484	intergenic	DRD2;TMPRSS5	dist=196051;dist=16098	.	.
20	rs61903061	11	113542672	C	T	0.1014	0.0937	2.604e-08	-5.566	1.259e-05	0.002123	0.02425	0.3837	0.00167525	0.02465	0.0602967	intergenic	DRD2;TMPRSS5	dist=196552;dist=15597	.	.
20	rs112991785	11	113542962	C	T	0.1014	0.0937	2.707e-08	5.559	1.71e-05	0.002076	0.04299	0.6185	0.00157725	0.02465	0.0602967	intergenic	DRD2;TMPRSS5	dist=196842;dist=15307	.	.
20	rs11606211	11	113543533	C	A	0.1014	0.0937	9.691e-09	5.736	1.594e-05	0.002027	0.02747	0.4423	0.00150834	0.02465	0.0568326	intergenic	DRD2;TMPRSS5	dist=197413;dist=14736	.	.
20	rs11606336	11	113544156	G	A	0.1014	0.0937	8.076e-09	5.767	1.442e-05	0.002023	0.02419	0.4434	0.00150574	0.02387	0.0568326	intergenic	DRD2;TMPRSS5	dist=198036;dist=14113	.	.
20	rs73005986	11	113544459	G	A	0.1014	0.0937	9.303e-09	5.743	1.54e-05	0.002026	0.02673	0.4456	0.00150591	0.02373	0.0568326	intergenic	DRD2;TMPRSS5	dist=198339;dist=13810	.	.
20	rs61903063	11	113545247	G	A	0.1004	0.0937	9.657e-09	5.737	1.456e-05	0.001981	0.025	0.4382	0.00150352	0.02446	0.057084	intergenic	DRD2;TMPRSS5	dist=199127;dist=13022	.	.
20	rs61903064	11	113545266	C	T	0.1004	0.0937	9.689e-09	5.736	1.463e-05	0.001989	0.02499	0.4383	0.00150262	0.02446	0.0568326	intergenic	DRD2;TMPRSS5	dist=199146;dist=13003	.	.
20	rs61903065	11	113545486	C	T	0.1004	0.0937	9.637e-09	5.737	1.454e-05	0.001989	0.02481	0.4395	0.00150335	0.02446	0.0568326	intergenic	DRD2;TMPRSS5	dist=199366;dist=12783	.	.
20	rs73005988	11	113545881	C	T	0.1004	0.0937	9.66e-09	5.737	1.479e-05	0.001989	0.02464	0.4396	0.00150373	0.02446	0.0568326	intergenic	DRD2;TMPRSS5	dist=199761;dist=12388	.	.
20	rs73005989	11	113546032	C	T	0.1004	0.0937	8.587e-09	5.757	1.52e-05	0.00206	0.02506	0.4369	0.00150269	0.02471	0.0577484	intergenic	DRD2;TMPRSS5	dist=199912;dist=12237	.	.
20	rs11607704	11	113548049	C	T	0.1014	0.0937	1.083e-08	-5.717	1.739e-05	0.002032	0.02574	0.4348	0.00149931	0.02386	0.0568326	intergenic	DRD2;TMPRSS5	dist=201929;dist=10220	.	.
20	rs17611093	11	113548309	C	T	0.1014	0.0937	9.132e-09	-5.746	1.675e-05	0.002032	0.02641	0.4346	0.0014973	0.02294	0.0568326	intergenic	DRD2;TMPRSS5	dist=202189;dist=9960	.	.
20	rs17611127	11	113548674	C	T	0.1014	0.0937	8.293e-09	-5.762	1.393e-05	0.002031	0.02643	0.4338	0.00149768	0.02294	0.0568326	intergenic	DRD2;TMPRSS5	dist=202554;dist=9595	.	.
20	rs61903067	11	113551209	G	A	0.1014	0.0937	3.656e-08	5.507	1.577e-05	0.002261	0.0268	0.4385	0.0014184	0.02246	0.0612209	intergenic	DRD2;TMPRSS5	dist=205089;dist=7060	.	.
20	rs11602210	11	113552457	C	T	0.1014	0.0922	3.757e-08	-5.502	1.708e-05	0.002289	0.02672	0.443	0.00139261	0.02223	0.0576522	intergenic	DRD2;TMPRSS5	dist=206337;dist=5812	.	.
20	rs61903075	11	113552469	G	A	0.1014	0.0922	4.049e-08	5.489	2.089e-05	0.002246	0.02643	0.4393	0.00139107	0.02223	0.0604973	intergenic	DRD2;TMPRSS5	dist=206349;dist=5800	.	.
20	rs11604194	11	113553049	C	A	0.1014	0.0922	3.78e-08	-5.501	1.692e-05	0.002329	0.02744	0.4377	0.00137543	0.02223	0.0576522	intergenic	DRD2;TMPRSS5	dist=206929;dist=5220	.	.
20	rs61903076	11	113553233	G	A	0.1014	0.0922	3.27e-08	-5.526	1.691e-05	0.001908	0.02742	0.4377	0.00137019	0.02223	0.0552325	intergenic	DRD2;TMPRSS5	dist=207113;dist=5036	.	.
20	rs61903077	11	113553296	C	A	0.1014	0.0922	3.786e-08	5.501	1.7e-05	0.002286	0.02745	0.4377	0.00136468	0.02223	0.0604973	intergenic	DRD2;TMPRSS5	dist=207176;dist=4973	.	.
20	rs61903078	11	113555502	G	A	0.1014	0.0922	3.852e-08	5.497	1.597e-05	0.00233	0.02692	0.4717	0.00124971	0.02223	0.0576522	intergenic	DRD2;TMPRSS5	dist=209382;dist=2767	.	.
20	rs11606035	11	113555925	G	A	0.1014	0.0922	3.812e-08	-5.499	1.624e-05	0.00233	0.02664	0.4708	0.00123208	0.02253	0.0576522	intergenic	DRD2;TMPRSS5	dist=209805;dist=2344	.	.
20	rs45533243	11	113557206	G	A	0.1014	0.0922	3.61e-08	5.509	1.58e-05	0.002287	0.0256	0.4747	0.00118563	0.02253	0.0604973	intergenic	DRD2;TMPRSS5	dist=211086;dist=1063	.	.
20	rs7106500	11	113559939	G	A	0.08946	0.0778	1.052e-08	5.722	4.232e-05	0.002405	0.01597	0.487	0.000700003	0.0191	0.135593	intronic	TMPRSS5	.	.	.
20	rs11607690	11	113561727	G	A	0.08946	0.0764	1.349e-08	5.68	4.815e-05	0.002702	0.0156	0.4897	0.000648515	0.02292	0.120655	intronic	TMPRSS5	.	.	.
20	rs11600570	11	113564012	G	A	0.09046	0.0735	1.699e-08	5.64	5.632e-05	0.003086	0.01622	0.5286	0.000734159	0.02857	0.100635	intronic	TMPRSS5	.	.	.
20	rs11601425	11	113570385	C	T	0.09046	0.0764	2.758e-08	5.556	6.607e-05	0.003208	0.01704	0.5211	0.000663285	0.02238	0.106485	exonic	TMPRSS5	.	nonsynonymous SNV	TMPRSS5:ENST00000538955.5_4:exon2:c.G5A:p.R2Q,TMPRSS5:ENST00000544476.1_4:exon2:c.G5A:p.R2Q,TMPRSS5:ENST00000299882.11_10:exon3:c.G137A:p.R46Q,TMPRSS5:ENST00000544634.5_4:exon3:c.G137A:p.R46Q,TMPRSS5:ENST00000545579.6_5:exon3:c.G110A:p.R37Q
20	rs61903082	11	113574270	G	A	0.09046	0.0764	2.389e-08	-5.581	8.506e-05	0.002905	0.01671	0.5143	0.000670749	0.02238	0.139135	intronic	TMPRSS5	.	.	.
20	rs45618134	11	113578393	G	A	0.09046	0.0749	2.554e-08	-5.57	0.0001087	0.003458	0.01523	0.5063	0.000675943	0.02508	0.106424	intergenic	TMPRSS5;ZW10	dist=1298;dist=25516	.	.
21	rs647905	11	121534938	C	T	0.4423	0.4496	5.141e-10	6.215	1.845e-07	0.05052	0.00606	0.08301	0.000486004	0.5135	0.0450871	intergenic	SORL1;ENSG00000286044	dist=30466;dist=10031	.	.	y
21	rs1783835	11	121542923	G	A	0.4473	0.3963	5.401e-09	-5.834	2.24e-09	0.1173	0.007198	0.2215	0.00163294	0.1052	0.31735	intergenic	SORL1;ENSG00000286044	dist=38451;dist=2046	.	.
22	rs4900595	14	104258054	G	A	0.3847	0.4121	1.523e-10	-6.403	1.678e-08	0.01836	0.8242	1.717e-05	0.000103633	0.7016	0.0223249	intronic	PPP1R13B	.	.	.
22	rs34813623	14	104263294	G	A	0.3837	0.4121	5.453e-11	-6.558	8.807e-09	0.0182	0.8385	1.888e-05	9.16474e-05	0.6517	0.0224062	intronic	PPP1R13B	.	.	.
22	rs7147171	14	104264857	G	A	0.3837	0.4121	1.861e-11	6.717	1.791e-09	0.01834	0.8393	1.15e-05	9.166e-05	0.4963	0.0224913	intronic	PPP1R13B	.	.	.
22	rs4906372	14	104265663	C	A	0.3827	0.4121	2.027e-11	-6.704	1.752e-09	0.01797	0.869	1.18e-05	9.12872e-05	0.5188	0.0224371	intronic	PPP1R13B	.	.	.
22	rs8020234	14	104266344	G	A	0.3777	0.4006	2.968e-11	6.648	6.519e-09	0.02787	0.9071	9.594e-06	7.7398e-05	0.643	0.00938374	intronic	PPP1R13B	.	.	.
22	rs12880368	14	104267290	C	T	0.3777	0.3977	3.299e-11	6.633	7.07e-09	0.02816	0.9105	9.243e-06	7.7341e-05	0.5982	0.00723884	intronic	PPP1R13B	.	.	.
22	rs12880233	14	104267333	G	A	0.3827	0.4121	5.149e-11	-6.567	2.427e-09	0.01793	0.8843	1.176e-05	9.12473e-05	0.4359	0.0208373	intronic	PPP1R13B	.	.	.
22	rs12880413	14	104267407	G	A	0.3827	0.4121	5.009e-11	-6.571	2.317e-09	0.0179	0.8837	1.173e-05	9.1199e-05	0.4388	0.0204978	intronic	PPP1R13B	.	.	.
22	rs11623546	14	104269098	G	A	0.3827	0.4107	5.421e-11	-6.559	2.318e-09	0.01833	0.8888	1.166e-05	9.11822e-05	0.4381	0.0233413	intronic	PPP1R13B	.	.	.
22	rs4906373	14	104269808	G	A	0.3827	0.4121	5.365e-11	-6.56	2.398e-09	0.01709	0.8781	1.235e-05	9.1679e-05	0.3879	0.0277444	intronic	PPP1R13B	.	.	.
22	rs55824307	14	104271207	C	T	0.3827	0.4107	5.298e-11	6.562	2.204e-09	0.01832	0.8876	1.167e-05	9.10039e-05	0.4423	0.0233252	intronic	PPP1R13B	.	.	.
22	rs12879501	14	104272634	G	T	0.3827	0.4107	1.553e-11	6.743	2.494e-09	0.01851	0.89	1.73e-05	8.44695e-05	0.4423	0.0233437	intronic	PPP1R13B	.	.	.
22	rs2368560	14	104273311	C	T	0.3777	0.3991	1.694e-10	6.387	6.163e-09	0.02784	0.9331	2.369e-05	7.70832e-05	0.5702	0.00984275	intronic	PPP1R13B	.	.	.
22	rs12885509	14	104273325	C	T	0.3032	0.3199	9.049e-14	-7.454	3.915e-08	0.03895	0.0951	1.922e-07	3.53924e-05	0.8657	0.0198356	intronic	PPP1R13B	.	.	.	y
22	rs12886363	14	104273786	C	T	0.3777	0.389	4.665e-11	-6.581	7.733e-09	0.02291	0.9304	8.812e-06	7.71401e-05	0.5762	0.0185394	intronic	PPP1R13B	.	.	.
22	rs12885018	14	104273812	G	A	0.3827	0.4107	8.768e-11	-6.487	1.931e-09	0.01607	0.8865	1.479e-05	9.10395e-05	0.4484	0.0260066	intronic	PPP1R13B	.	.	.
22	rs12891175	14	104274166	C	T	0.3837	0.4121	8.006e-11	-6.5	2.425e-09	0.01819	0.8461	1.204e-05	9.10249e-05	0.4536	0.0222729	intronic	PPP1R13B	.	.	.
22	rs12889993	14	104274294	G	A	0.3837	0.4107	8.072e-11	-6.499	2.269e-09	0.01832	0.8536	1.193e-05	9.10039e-05	0.4423	0.0234827	intronic	PPP1R13B	.	.	.
22	rs12880821	14	104276049	C	T	0.3787	0.3876	4.261e-11	6.595	7.372e-09	0.02297	0.9107	8.598e-06	7.70708e-05	0.5684	0.019659	intronic	PPP1R13B	.	.	.
22	rs8013637	14	104277958	G	A	0.3777	0.3862	2.886e-11	6.652	8.648e-09	0.02323	0.8777	7.913e-06	7.70158e-05	0.6208	0.0216908	intronic	PPP1R13B	.	.	.
22	rs8005594	14	104279889	C	T	0.3847	0.4121	1.923e-11	-6.712	2.945e-09	0.01796	0.814	1.204e-05	9.08636e-05	0.4364	0.0222781	intronic	PPP1R13B	.	.	.
22	rs8011109	14	104279974	G	A	0.3837	0.4121	2.648e-11	6.665	1.808e-09	0.01807	0.8436	1.218e-05	9.08636e-05	0.4438	0.0223369	intronic	PPP1R13B	.	.	.
22	rs2887282	14	104280734	C	T	0.3837	0.4121	1.628e-11	-6.736	1.952e-09	0.01796	0.8434	1.044e-05	9.0849e-05	0.4197	0.0221632	intronic	PPP1R13B	.	.	.
22	rs4900598	14	104281541	C	T	0.3847	0.4121	1.156e-11	-6.786	2.01e-09	0.02067	0.8267	9.691e-06	9.08218e-05	0.4178	0.0223792	intronic	PPP1R13B	.	.	.
22	rs8018062	14	104281954	C	T	0.3837	0.4092	1.026e-11	6.803	2.043e-09	0.01956	0.8183	9.274e-06	9.07946e-05	0.4583	0.0192709	intronic	PPP1R13B	.	.	.
22	rs2223937	14	104286380	G	A	0.3847	0.4092	1.938e-11	-6.711	1.833e-09	0.01874	0.8541	1.178e-05	9.07591e-05	0.527	0.0190638	intronic	PPP1R13B	.	.	.
22	rs8021682	14	104289005	C	T	0.3827	0.4063	2.048e-11	6.703	2.137e-09	0.02015	0.9225	1.195e-05	9.00389e-05	0.5666	0.019828	intronic	PPP1R13B	.	.	.
22	rs4900600	14	104291839	G	A	0.3837	0.4078	1.55e-11	-6.743	2.352e-09	0.02004	0.8539	1.304e-05	9.00803e-05	0.4918	0.0176007	intronic	PPP1R13B	.	.	.
22	rs7159810	14	104294117	G	T	0.3837	0.4107	1.154e-11	-6.786	1.987e-09	0.01833	0.8335	1.034e-05	0.000102731	0.4427	0.0203309	intronic	PPP1R13B	.	.	.
22	rs1475007	14	104297147	G	A	0.3837	0.4107	4.087e-11	-6.601	3.333e-09	0.018	0.752	1.04e-05	8.2124e-05	0.4651	0.0191972	intronic	PPP1R13B	.	.	.
22	rs8003653	14	104298836	G	A	0.3837	0.4121	1.896e-11	-6.714	2.844e-09	0.01897	0.8464	1.239e-05	8.66383e-05	0.465	0.0198102	intronic	PPP1R13B	.	.	.
22	rs11160765	14	104299730	C	T	0.3837	0.4121	2.365e-11	-6.681	2.947e-09	0.01896	0.8389	1.336e-05	8.93285e-05	0.4595	0.0198102	intronic	PPP1R13B	.	.	.
22	rs8005225	14	104300151	C	T	0.3837	0.4121	1.727e-11	-6.727	2.747e-09	0.01906	0.8457	1.079e-05	8.62502e-05	0.4632	0.0199698	intronic	PPP1R13B	.	.	.
22	rs12880167	14	104300829	C	T	0.3847	0.4107	2.678e-11	6.663	2.228e-09	0.0187	0.7515	9.255e-06	8.62422e-05	0.466	0.0216397	intronic	PPP1R13B	.	.	.
22	rs28533661	14	104305794	G	A	0.3837	0.4121	2.379e-13	-7.326	2.908e-09	0.01773	0.3654	5.585e-05	8.24062e-05	0.4797	0.0181214	intronic	PPP1R13B	.	.	.
22	rs1040813	14	104306696	C	T	0.3837	0.4121	7.793e-12	-6.842	2.758e-09	0.01797	0.6476	1.068e-05	8.14292e-05	0.4785	0.0195846	intronic	PPP1R13B	.	.	.
22	rs8005536	14	104307553	C	T	0.3847	0.4121	2.848e-11	-6.654	2.578e-09	0.01683	0.6264	1.177e-05	8.23171e-05	0.4831	0.0194098	intronic	PPP1R13B	.	.	.
22	rs8011137	14	104308920	G	A	0.3837	0.4121	8.33e-12	6.833	2.779e-09	0.01831	0.661	9.971e-06	8.30654e-05	0.4999	0.0193798	intronic	PPP1R13B	.	.	.
22	rs1187416	14	104311465	G	A	0.3837	0.4107	7.944e-12	-6.84	3.011e-09	0.01708	0.6533	9.142e-06	8.13598e-05	0.5779	0.0198791	intronic	PPP1R13B	.	.	.
22	rs12892186	14	104318787	C	T	0.3757	0.3991	1.865e-11	6.716	1.088e-08	0.03312	0.6088	7.317e-06	6.64293e-05	0.599	0.0068737	ncRNA_intronic	PPP1R13B-DT	.	.	.
22	rs12878678	14	104319730	C	T	0.3807	0.4107	1.494e-11	-6.748	3.429e-09	0.01776	0.5981	6.801e-06	7.8251e-05	0.4896	0.013897	ncRNA_intronic	PPP1R13B-DT	.	.	.
22	rs10135198	14	104344391	C	T	0.3986	0.3689	2.614e-12	-6.997	2.775e-08	0.9342	0.04063	7.08e-05	0.000679079	0.8515	0.0374082	ncRNA_intronic	ENSG00000258534;ENSG00000287346	.	.	.	y
22	rs10438242	14	104345075	C	T	0.3986	0.3689	2.583e-11	-6.669	2.981e-08	0.9339	0.05438	8.347e-05	0.000711263	0.8085	0.0374943	ncRNA_intronic	ENSG00000258534;ENSG00000287346	.	.	.
22	rs6576010	14	104349602	G	A	0.3956	0.3516	1.446e-10	6.411	1.96e-08	0.2171	0.07135	9.731e-05	0.000782618	0.9962	0.0347691	intergenic	ENSG00000287346;ATP5MJ	dist=2884;dist=29023	.	.
22	rs4900601	14	104358076	C	T	0.3817	0.3329	1.457e-10	6.41	1.372e-07	0.1049	0.0801	9.548e-05	0.000339938	0.6644	0.0527145	intergenic	ENSG00000287346;ATP5MJ	dist=11358;dist=20549	.	.
22	rs71417884	14	104361667	C	T	0.3817	0.3429	1.173e-10	-6.443	1.082e-07	0.1452	0.04343	0.0001363	0.000406537	0.6933	0.0508465	intergenic	ENSG00000287346;ATP5MJ	dist=14949;dist=16958	.	.
22	rs72712857	14	104362673	C	T	0.3807	0.3444	2.774e-11	-6.658	2.048e-07	0.1883	0.04106	0.0001221	0.000304404	0.5342	0.049166	intergenic	ENSG00000287346;ATP5MJ	dist=15955;dist=15952	.	.
23	rs1486901	15	47642993	G	A	0.3489	0.4683	1.155e-10	6.445	4.907e-06	0.2827	0.02523	0.0001098	2.36499e-07	0.7859	0.373049	intronic	SEMA6D	.	.	.
23	rs531595	15	47643253	G	A	0.3638	0.4769	2.059e-12	7.03	1.034e-05	0.2495	0.005927	2.012e-05	1.72477e-07	0.6079	0.434136	intronic	SEMA6D	.	.	.
23	rs653298	15	47644409	G	T	0.3638	0.4769	8.765e-12	6.825	9.469e-06	0.2528	0.005736	1.979e-05	1.51558e-07	0.6527	0.438776	intronic	SEMA6D	.	.	.
23	rs653749	15	47644528	G	A	0.3638	0.4769	1.877e-11	-6.715	1.172e-05	0.2525	0.005944	1.99e-05	1.72651e-07	0.6997	0.436565	intronic	SEMA6D	.	.	.
23	rs665751	15	47644963	C	T	0.3628	0.4769	1.418e-14	7.695	1.153e-05	0.5752	0.005153	2.068e-05	1.72651e-07	0.7452	0.430448	intronic	SEMA6D	.	.	.	y
23	rs1496919	15	47645491	G	A	0.3638	0.4769	2.496e-12	-7.004	1.102e-05	0.2853	0.005245	1.983e-05	1.72223e-07	0.7303	0.413885	intronic	SEMA6D	.	.	.
23	rs1390876	15	47645789	G	A	0.3638	0.4769	1.079e-13	7.431	1.171e-05	0.5602	0.006076	2.012e-05	1.72631e-07	0.6699	0.422393	intronic	SEMA6D	.	.	.
23	rs1390877	15	47645892	C	T	0.3489	0.4683	4.233e-11	6.596	5.033e-06	0.3155	0.02348	0.000108	2.38046e-07	0.8629	0.374091	intronic	SEMA6D	.	.	.
23	rs955686	15	47645956	C	T	0.3638	0.4769	5.84e-14	7.512	1.089e-05	0.5602	0.005064	2.01e-05	1.72445e-07	0.6392	0.422393	intronic	SEMA6D	.	.	.
23	rs955685	15	47646032	G	A	0.3638	0.4769	1.083e-13	-7.43	1.145e-05	0.5611	0.004816	2.063e-05	1.7185e-07	0.6128	0.422393	intronic	SEMA6D	.	.	.
23	rs590247	15	47647560	C	T	0.3559	0.4697	3.46e-10	-6.277	2.508e-05	0.286	0.02144	9.487e-05	2.80098e-07	0.9362	0.507733	intronic	SEMA6D	.	.	.
23	rs591143	15	47647755	C	T	0.3708	0.4784	3.202e-10	-6.289	0.05382	0.715	0.004934	1.591e-05	2.02442e-07	0.697	0.581511	intronic	SEMA6D	.	.	.
23	rs281274	15	47659445	C	T	0.3628	0.464	1.001e-11	-6.806	1.472e-05	0.2659	0.0323	1.794e-05	3.10899e-08	0.7019	0.582887	ncRNA_intronic	ENSG00000259221	.	.	.
23	rs281280	15	47661369	G	A	0.3618	0.464	3.394e-11	-6.628	8.882e-06	0.267	0.02896	2.074e-05	3.10899e-08	0.6955	0.60213	ncRNA_intronic	ENSG00000259221	.	.	.
23	rs281258	15	47672201	C	T	0.3638	0.4683	4.308e-12	-6.927	7.53e-06	0.2966	0.01992	2.529e-05	3.07971e-08	0.7062	0.56301	ncRNA_intronic	ENSG00000259221	.	.	.
23	rs281259	15	47672312	C	T	0.3638	0.4683	3.115e-12	-6.972	6.854e-06	0.2963	0.0204	1.606e-05	3.06577e-08	0.6882	0.56301	ncRNA_intronic	ENSG00000259221	.	.	.
23	rs281260	15	47673928	C	T	0.3638	0.4683	3.65e-12	-6.95	4.895e-06	0.2984	0.02078	2.893e-05	2.64911e-08	0.7114	0.567149	ncRNA_intronic	ENSG00000259221	.	.	.
23	rs175979	15	47674812	G	A	0.3638	0.4683	1.245e-12	7.1	2.17e-06	0.29	0.01988	1.895e-05	1.97843e-08	0.7174	0.562895	ncRNA_intronic	ENSG00000259221	.	.	.
23	rs281264	15	47675569	G	A	0.3439	0.4597	3.889e-10	-6.258	1.223e-05	0.2842	0.01041	7.196e-05	1.95862e-08	0.7061	0.374038	ncRNA_intronic	ENSG00000259221	.	.	.
23	rs281265	15	47675602	C	A	0.3439	0.4597	4.458e-10	-6.237	1.262e-05	0.2844	0.01044	9.012e-05	1.95686e-08	0.7029	0.374038	ncRNA_intronic	ENSG00000259221	.	.	.
23	rs7175414	15	47676200	G	A	0.2068	0.2233	2.554e-11	6.67	4.596e-06	0.2195	0.01288	0.0005339	1.89535e-08	0.05122	0.835893	ncRNA_intronic	ENSG00000259221	.	.	.
23	rs7174964	15	47676228	C	A	0.2068	0.2233	2.211e-11	-6.691	4.532e-06	0.2195	0.01293	0.000466	1.72179e-08	0.04931	0.835893	ncRNA_intronic	ENSG00000259221	.	.	.
23	rs6493274	15	47676489	C	A	0.2068	0.2233	2.224e-11	-6.691	4.368e-06	0.2194	0.01277	0.0004404	1.90029e-08	0.04931	0.836204	ncRNA_intronic	ENSG00000259221	.	.	.
23	rs8040191	15	47676716	C	T	0.2068	0.2233	2.814e-11	6.656	5.388e-06	0.2188	0.01395	0.0004591	2.11252e-08	0.04927	0.836534	ncRNA_intronic	ENSG00000259221	.	.	.
23	rs8040226	15	47676830	G	A	0.2068	0.2233	3.358e-11	-6.63	5.632e-06	0.2196	0.01358	0.0005899	1.91113e-08	0.05122	0.837062	ncRNA_intronic	ENSG00000259221	.	.	.
23	rs8041603	15	47676855	C	T	0.2068	0.2233	3.225e-11	-6.636	5.547e-06	0.2202	0.01301	0.0005952	1.91113e-08	0.05076	0.840079	ncRNA_intronic	ENSG00000259221	.	.	.
23	rs2433018	15	47677596	G	A	0.3111	0.4438	3.866e-11	-6.609	0.0001201	0.2801	0.05049	0.0001802	9.35233e-09	0.7961	0.401332	ncRNA_intronic	ENSG00000259221	.	.	.
23	rs7166534	15	47678132	C	T	0.2068	0.2233	3.03e-11	-6.645	5.873e-06	0.2186	0.01247	0.0005664	1.91113e-08	0.05046	0.836421	ncRNA_intronic	ENSG00000259221	.	.	.
23	rs4485292	15	47678898	G	A	0.2068	0.2233	1.49e-11	6.749	6.274e-06	0.2252	0.01274	0.0006589	1.91113e-08	0.04634	0.834696	ncRNA_intronic	ENSG00000259221	.	.	.
23	rs12904595	15	47679524	C	T	0.2068	0.2233	6.117e-12	-6.877	2.525e-06	0.233	0.01291	0.0006269	1.91113e-08	0.04251	0.839348	ncRNA_intronic	ENSG00000259221	.	.	.
23	rs2132661	15	47679726	G	A	0.2068	0.2233	5.853e-12	-6.883	2.198e-06	0.2329	0.0129	0.0006273	1.91113e-08	0.04204	0.838137	ncRNA_intronic	ENSG00000259221	.	.	.	y
23	rs2132660	15	47679807	G	A	0.2068	0.2233	5.869e-12	-6.883	2.222e-06	0.2315	0.0129	0.0006279	1.91113e-08	0.04234	0.844067	ncRNA_intronic	ENSG00000259221	.	.	.
23	rs8032333	15	47680567	G	A	0.2068	0.2233	7.936e-12	-6.84	2.852e-06	0.2127	0.013	0.0005789	1.90673e-08	0.04531	0.791168	ncRNA_intronic	ENSG00000259221	.	.	.
23	rs35473814	15	47680662	G	A	0.2068	0.2233	1.199e-11	6.78	2.92e-06	0.2643	0.01297	0.000581	1.90042e-08	0.04284	0.843537	ncRNA_intronic	ENSG00000259221	.	.	.
23	rs34794623	15	47680801	C	A	0.2068	0.2233	7.837e-12	6.841	2.919e-06	0.2643	0.01291	0.0005822	1.8978e-08	0.04082	0.843537	ncRNA_intronic	ENSG00000259221	.	.	.
23	rs35175834	15	47680815	G	A	0.2068	0.2233	7.409e-12	6.85	2.913e-06	0.2643	0.0129	0.0005372	1.89644e-08	0.04169	0.842576	ncRNA_intronic	ENSG00000259221	.	.	.
23	rs281286	15	47681250	C	T	0.3479	0.4568	1.815e-11	-6.72	1.321e-05	0.2954	0.01581	4.249e-05	1.76104e-07	0.7336	0.363343	ncRNA_intronic	ENSG00000259221	.	.	.
23	rs8034190	15	47681367	G	A	0.2028	0.2233	3.517e-11	6.623	7.936e-07	0.2574	0.01465	0.001877	1.90287e-08	0.04007	0.870533	ncRNA_intronic	ENSG00000259221	.	.	.
23	rs8033799	15	47681384	C	A	0.2028	0.2233	4.124e-11	-6.6	7.503e-07	0.291	0.01444	0.001099	1.90279e-08	0.0402	0.854473	ncRNA_intronic	ENSG00000259221	.	.	.
23	rs12910487	15	47681390	C	T	0.2028	0.2248	3.639e-11	6.618	8.109e-07	0.2574	0.01453	0.001118	1.90279e-08	0.03974	0.870533	ncRNA_intronic	ENSG00000259221	.	.	.
23	rs281287	15	47681552	G	A	0.3559	0.4597	1.609e-11	-6.738	6.294e-06	0.2848	0.009344	4.411e-05	8.69581e-08	0.6485	0.384301	ncRNA_intronic	ENSG00000259221	.	.	.
23	rs281293	15	47683333	G	A	0.3489	0.4582	1.18e-10	6.442	1.211e-05	0.3056	0.01807	5.626e-05	1.71333e-07	0.6908	0.376748	ncRNA_intronic	ENSG00000259221	.	.	.
23	rs4404005	15	47684196	C	T	0.3479	0.4553	6.871e-11	6.523	1.03e-05	0.2982	0.01279	4.883e-05	1.63912e-07	0.737	0.39521	ncRNA_intronic	ENSG00000259221	.	.	.
23	rs12907546	15	47684280	G	A	0.2068	0.2233	3.344e-11	6.631	3.958e-06	0.2196	0.01116	0.0006161	1.74502e-08	0.04787	0.890398	ncRNA_intronic	ENSG00000259221	.	.	.
23	rs4497626	15	47684508	G	A	0.3479	0.4553	3.231e-12	-6.967	1.839e-05	0.2949	0.01138	4.957e-05	1.64505e-07	0.8284	0.398513	ncRNA_intronic	ENSG00000259221	.	.	.
23	rs4338738	15	47684530	G	A	0.3479	0.4553	3.126e-12	6.972	1.678e-05	0.298	0.0116	4.86e-05	1.63347e-07	0.8375	0.394456	ncRNA_intronic	ENSG00000259221	.	.	.
23	rs4511474	15	47684680	G	A	0.3479	0.4553	3.419e-12	6.959	1.482e-05	0.3085	0.01181	5.36e-05	1.63279e-07	0.8381	0.404198	ncRNA_intronic	ENSG00000259221	.	.	.
23	rs59321834	15	47684725	G	A	0.3479	0.4568	1.469e-09	6.048	1.143e-05	0.3182	0.01512	0.09725	1.62821e-07	0.8964	0.403565	ncRNA_intronic	ENSG00000259221	.	.	.
23	rs1025142	15	47684932	C	A	0.3479	0.4553	2.374e-11	-6.681	1.651e-05	0.2969	0.0117	8.453e-05	1.6131e-07	0.8851	0.401616	ncRNA_intronic	ENSG00000259221	.	.	.
23	rs34488670	15	47684936	C	T	0.2068	0.2233	8.927e-12	-6.823	2.648e-06	0.2327	0.01041	0.001157	1.73524e-08	0.03212	0.886102	ncRNA_intronic	ENSG00000259221	.	.	.
24	rs12979891	19	49227256	C	T	0.4791	0.2968	2.425e-08	5.579	3.14e-09	0.001421	0.02208	0.8276	0.0524977	0.1703	0.218898	intronic	RASIP1	.	.	.
24	rs11878908	19	49227443	C	T	0.4811	0.2968	1.649e-08	5.645	2.486e-09	0.001464	0.02091	0.8791	0.0524856	0.1852	0.248495	intronic	RASIP1	.	.	.
24	rs2287922	19	49232226	G	A	0.4791	0.2997	4.949e-08	5.453	3.448e-09	0.001705	0.02031	0.8815	0.0443609	0.2298	0.206931	exonic	RASIP1	.	nonsynonymous SNV	RASIP1:ENST00000222145.9_7:exon5:c.C1801T:p.R601C
24	rs418464	19	49239026	C	T	0.4602	0.2738	5.441e-09	-5.833	1.986e-09	0.0004011	0.002748	0.8719	0.0536673	0.2271	0.118234	intronic	RASIP1	.	.	.
24	rs1231281	19	49239200	G	A	0.4583	0.2738	1.075e-09	6.098	1.726e-09	0.0007259	0.002477	0.8603	0.047203	0.5074	0.169804	intronic	RASIP1	.	.	.	y
24	rs380743	19	49241014	G	A	0.4583	0.268	4.339e-09	5.871	3.186e-09	0.0005063	0.004847	0.9644	0.0736326	0.3729	0.143633	intronic	RASIP1	.	.	.
24	rs427248	19	49241015	C	T	0.4583	0.268	4.467e-09	5.866	3.602e-09	0.0005033	0.004975	0.9587	0.0718671	0.3729	0.143633	intronic	RASIP1	.	.	.
24	rs973579	19	49241976	G	A	0.4602	0.2738	4.283e-09	-5.873	1.705e-09	0.0005966	0.002824	0.8986	0.0516095	0.258	0.110358	intronic	RASIP1	.	.	.

## Sheet: S7.AA.EA.LA.sig.SNPs
Locus	rsID	chr	pos	non_Effect_Allele	Effect_Allele	1KG.EUR.MAF	1KG.AFR.MAF	1KG.AMR.MAF	Meta.P	Meta.beta	AA.AUD.P	AA.OUD.P	AA.CUD.P	AA.TUD.P	EA.OUD.P	EA.OUD.P	EA.CUD.P	EA.TUD.P	Finngen.SUD.P	HIS.AUD.P	HIS.OUD.P	Func.ensGene	Gene.ensGene	GeneDetail.ensGene	ExonicFunc.ensGene	AAChange.ensGene	Independent
1	rs6691929	1	66435953	G	A	0.2893	0.1808	0.3401	1.332e-10	6.424	0.5329	0.8714	0.9046	0.4504	3.247e-08	0.02408	0.00448	0.03058	0.000208238	0.9076	0.0104016	intronic	PDE4B	.	.	.
1	rs1937436	1	66441329	G	A	0.2883	0.1823	0.3401	7.042e-10	-6.165	0.5785	0.9377	0.8609	0.4363	1.907e-08	0.024	0.007204	0.04166	0.000218801	0.8248	0.0108212	intronic	PDE4B	.	.	.
1	rs12564578	1	66445516	G	A	0.2883	0.1808	0.3401	1.213e-10	-6.438	0.5611	0.9053	0.8467	0.4362	1.588e-08	0.02433	0.007144	0.04773	0.000219099	0.8564	0.012469	intronic	PDE4B	.	.	.	y
2	rs7517355	1	73784077	G	A	0.4215	0.5265	0.5994	6.035e-11	6.543	0.007307	0.1926	0.03225	0.3998	1.154e-06	0.009779	0.01213	0.01134	0.00679235	0.9912	0.201584	ncRNA_intronic	LINC01360	.	.	.
2	rs2340398	1	73788694	C	T	0.4215	0.5265	0.6009	5.147e-11	6.567	0.00806	0.1794	0.0297	0.4313	1.075e-06	0.009229	0.01204	0.01095	0.00678907	0.9766	0.194915	ncRNA_intronic	LINC01360	.	.	.
2	rs2340400	1	73821281	C	T	0.4235	0.5552	0.6052	9.457e-11	6.475	0.01677	0.2259	0.1149	0.5413	7.166e-07	0.00528	0.009429	0.0195	0.00790205	0.9214	0.266026	downstream	LINC01360	dist=347	.	.
2	rs6655995	1	73821577	C	A	0.4215	0.5121	0.5965	3.863e-11	-6.609	0.01654	0.191	0.0302	0.4738	8.125e-07	0.007148	0.009092	0.009564	0.00705407	0.9286	0.248735	downstream	LINC01360	dist=643	.	.
2	rs1923216	1	73829128	C	T	0.4235	0.5643	0.6066	6.111e-11	-6.541	0.01611	0.1556	0.1517	0.5436	6.989e-07	0.005152	0.009748	0.01825	0.00863436	0.8679	0.228455	intergenic	LINC01360;LINC02238	dist=8194;dist=271771	.	.
2	rs2340403	1	73835777	C	T	0.4215	0.5227	0.5994	2.814e-11	-6.656	0.02295	0.1126	0.03946	0.42	5.595e-07	0.00708	0.01011	0.009591	0.00702846	0.9936	0.228457	intergenic	LINC01360;LINC02238	dist=14843;dist=265122	.	.
2	rs6671002	1	73851752	G	A	0.4354	0.4818	0.6081	4.51e-11	6.586	0.1677	0.0176	0.09344	0.9306	4.619e-08	0.001421	0.03436	0.03763	0.0140614	0.9928	0.276962	intergenic	LINC01360;LINC02238	dist=30818;dist=249147	.	.
2	rs12035848	1	73870901	G	A	0.4354	0.5946	0.621	7.997e-11	-6.501	0.007504	0.04016	0.1286	0.4984	5.609e-08	0.001237	0.03998	0.04252	0.0137142	0.9619	0.159769	intergenic	LINC01360;LINC02238	dist=49967;dist=229998	.	.
2	rs12043387	1	73871205	G	A	0.4354	0.5946	0.621	2.67e-11	6.664	0.007348	0.04031	0.1276	0.5127	5.605e-08	0.00124	0.04085	0.04225	0.0151471	0.9619	0.159856	intergenic	LINC01360;LINC02238	dist=50271;dist=229694	.	.
2	rs1475064	1	73882478	G	A	0.4354	0.5946	0.621	1.537e-11	6.744	0.006903	0.041	0.1636	0.5219	2.822e-08	0.001178	0.03627	0.03761	0.0150966	0.9603	0.170888	intergenic	LINC01360;LINC02238	dist=61544;dist=218421	.	.	y
3	rs4858830	3	48734002	C	T	0.2227	0.1392	0.1542	1.307e-08	5.685	0.9672	0.9633	0.1484	0.1111	3.789e-05	0.005039	0.06562	0.05256	0.000138153	0.5604	0.31742	intronic	IP6K2	.	.	.
3	rs6442129	3	48735256	C	T	0.2227	0.1392	0.1542	1.062e-08	5.721	0.9664	0.9765	0.1417	0.1111	3.811e-05	0.004794	0.06498	0.05345	0.000138153	0.5452	0.32233	intronic	IP6K2	.	.	.
3	rs9882443	3	48749064	G	A	0.2157	0.0998	0.1369	6.343e-09	-5.807	0.9651	0.7528	0.3083	0.02566	2.55e-05	0.005056	0.04472	0.05043	0.000139136	0.9528	0.54104	intronic	IP6K2	.	.	.
3	rs4858800	3	48755820	G	A	0.2227	0.1377	0.1542	9.89e-09	5.733	0.7545	0.9003	0.1352	0.1106	3.199e-05	0.005618	0.06605	0.0486	0.000122809	0.6804	0.295685	intergenic	IP6K2;PRKAR2A	dist=1109;dist=28199	.	.
3	rs10865953	3	48759562	C	T	0.2237	0.1399	0.1542	7.308e-09	-5.784	0.929	0.9223	0.3253	0.1154	3.462e-05	0.005425	0.0595	0.03734	0.000128375	0.628	0.309268	intergenic	IP6K2;PRKAR2A	dist=4851;dist=24457	.	.
3	rs6766238	3	48801929	G	A	0.2187	0.1014	0.1398	2.212e-09	-5.981	0.1296	0.922	0.9012	0.3444	5.304e-05	0.004734	0.04661	0.02106	9.5284e-05	0.4912	0.464329	intronic	PRKAR2A	.	.	.
3	rs9859473	3	48837182	C	T	0.2187	0.0991	0.1398	1.777e-09	6.017	0.06686	0.9093	0.9322	0.371	8.362e-05	0.004224	0.04155	0.01969	9.15082e-05	0.4288	0.476592	intronic	PRKAR2A	.	.	.
3	rs7611628	3	48838364	C	T	0.2187	0.1006	0.1398	1.701e-09	6.024	0.06582	0.8963	0.9179	0.3463	8.485e-05	0.004488	0.04074	0.01926	9.15166e-05	0.4288	0.47572	intronic	PRKAR2A	.	.	.
3	rs9879978	3	48846600	G	T	0.2197	0.1014	0.1398	1.514e-09	6.043	0.06536	0.8903	0.9187	0.3364	7.462e-05	0.004112	0.04108	0.01945	9.15082e-05	0.4578	0.472869	intronic	PRKAR2A	.	.	.
3	rs4974088	3	48898749	C	T	0.2177	0.0098	0.1268	6.434e-09	5.805	0.9572	0.534	0.4958	0.1774	0.0001037	0.006686	0.04547	0.01836	9.65873e-05	0.815	0.68545	intronic	SLC25A20	.	.	.
3	rs7611358	3	48927856	C	T	0.2197	0.1014	0.1398	1.192e-09	-6.081	0.07058	0.9652	0.9287	0.3824	0.0001037	0.00485	0.05496	0.01785	0.000100693	0.4791	0.482593	intronic	SLC25A20	.	.	.
3	rs7621226	3	48928759	C	T	0.2197	0.1021	0.1398	9.888e-10	6.111	0.06566	0.9613	0.9632	0.381	0.0001011	0.004807	0.05229	0.01752	0.000100693	0.4791	0.430321	intronic	SLC25A20	.	.	.
3	rs12715430	3	48942855	C	A	0.2197	0.0991	0.1398	2.176e-09	5.984	0.06543	0.8976	0.8864	0.4074	8.682e-05	0.004562	0.0405	0.01731	9.86984e-05	0.4905	0.45913	intergenic	SLC25A20;ARIH2OS	dist=6518;dist=12360	.	.
3	rs11707968	3	48953349	C	T	0.2197	0.0991	0.1398	1.572e-09	-6.037	0.06703	0.8819	0.8945	0.4042	8.468e-05	0.004707	0.03644	0.01481	0.000110459	0.4905	0.464314	intergenic	SLC25A20;ARIH2OS	dist=17012;dist=1866	.	.
3	rs9284886	3	48960572	G	A	0.2197	0.0998	0.1398	1.622e-08	5.648	0.05911	0.9511	0.8709	0.4067	0.0001071	0.0047	0.04333	0.1554	0.000120973	0.4948	0.45498	intronic	ARIH2	.	.	.
3	rs7653408	3	48972351	C	A	0.2197	0.0991	0.1398	1.951e-09	6.002	0.06625	0.8877	0.8998	0.4158	7.774e-05	0.004779	0.04325	0.01524	0.000120083	0.4923	0.457478	intronic	ARIH2	.	.	.
3	rs9864243	3	48982732	G	A	0.2197	0.1036	0.1398	1.207e-09	-6.079	0.06973	0.9336	0.8576	0.4527	8.422e-05	0.005016	0.03619	0.01821	0.000115958	0.4891	0.420532	intronic	ARIH2	.	.	.
3	rs6446204	3	49034879	C	T	0.2167	0.0098	0.1268	3.421e-09	5.91	0.7418	0.5106	0.5056	0.1777	0.0001236	0.006648	0.05014	0.01587	8.37375e-05	0.7285	0.663737	intronic	P4HTM	.	.	.
3	rs4974081	3	49070499	C	T	0.2197	0.0976	0.1398	1.774e-09	-6.017	0.0802	0.8826	0.9403	0.2825	0.0001399	0.004492	0.02989	0.01502	7.77106e-05	0.5085	0.411088	intronic	ENSG00000290315;QRICH1	.	.	.
3	rs6787808	3	49079105	C	T	0.2197	0.0976	0.1398	2.259e-09	5.978	0.08179	0.8822	0.9464	0.291	0.000167	0.004466	0.02696	0.01373	7.75408e-05	0.511	0.411107	intronic	ENSG00000290315;QRICH1	.	.	.
3	rs4955426	3	49143438	C	A	0.1998	0.0091	0.1239	2.328e-09	-5.973	0.8413	0.3831	0.8789	0.1698	0.0002618	0.007575	0.02418	0.03263	3.89296e-06	0.9602	0.668232	intergenic	QARS1;USP19	dist=1247;dist=2041	.	.
3	rs9865051	3	49166069	C	T	0.2087	0.1006	0.147	1.274e-09	-6.071	0.1722	0.6842	0.9172	0.2567	0.0004732	0.005958	0.01883	0.03543	4.00433e-06	0.5354	0.261788	intronic	LAMB2	.	.	.
3	rs6778080	3	49317338	C	T	0.2435	0.2912	0.2017	1.507e-10	6.405	0.4414	0.3815	0.7453	0.1656	5.639e-06	0.005628	0.02796	0.074	7.69768e-07	0.7569	0.51833	intronic	USP4	.	.	.
3	rs4955440	3	49388633	C	T	0.2316	0.2821	0.1988	4.823e-10	6.225	0.2687	0.8109	0.6019	0.09605	3.097e-06	0.00766	0.01123	0.08839	8.66423e-06	0.7607	0.666378	intergenic	USP4;GPX1	dist=11147;dist=5974	.	.
3	rs11720657	3	49392620	G	A	0.2316	0.2897	0.1988	1.696e-10	6.387	0.2398	0.9022	0.5801	0.0773	2.64e-06	0.007681	0.012	0.09254	8.05137e-06	0.6499	0.693308	intergenic	USP4;GPX1	dist=15134;dist=1987	.	.
3	rs3448	3	49396751	C	T	0.2316	0.2814	0.1988	1.093e-09	6.095	0.2175	0.8009	0.9399	0.2529	2.738e-06	0.00758	0.01257	0.08171	8.41938e-06	0.7473	0.667897	UTR3	RHOA	ENST00000422781.6_6:c.*1048G>A;ENST00000678200.1_2:c.*891G>A;ENST00000454011.7_6:c.*1079G>A;ENST00000678921.2_5:c.*3172G>A;ENST00000676712.2_5:c.*891G>A;ENST00000418115.6_6:c.*891G>A	.	.
3	rs6446262	3	49401153	C	T	0.2316	0.1021	0.1744	1.302e-10	6.427	0.3497	0.4468	0.8594	0.6112	3.445e-06	0.008226	0.01391	0.08425	7.9704e-06	0.786	0.504157	intronic	ENSG00000290318;RHOA	.	.	.
3	rs11130190	3	49402137	C	T	0.2316	0.2821	0.1988	3.999e-10	6.254	0.2517	0.8116	0.6183	0.1065	2.733e-06	0.007654	0.01332	0.08425	7.95738e-06	0.724	0.667273	intronic	ENSG00000290318;RHOA	.	.	.
3	rs9812360	3	49402351	C	T	0.2316	0.1021	0.1744	1.167e-10	6.444	0.3495	0.4468	0.8594	0.6112	3.438e-06	0.008151	0.01314	0.08115	7.94859e-06	0.786	0.504157	intronic	ENSG00000290318;RHOA	.	.	.	y
3	rs4955413	3	49410066	C	A	0.2316	0.2821	0.1988	4.325e-10	6.242	0.2398	0.8073	0.6142	0.1062	2.76e-06	0.007672	0.01475	0.08468	7.93725e-06	0.7458	0.666296	intronic	ENSG00000290318;RHOA	.	.	.
3	rs9842132	3	49427933	G	A	0.2316	0.2821	0.1988	3.77e-10	6.263	0.2689	0.708	0.6049	0.1064	2.717e-06	0.008004	0.01255	0.08484	1.28053e-05	0.744	0.686179	intronic	ENSG00000290318;RHOA	.	.	.
3	rs9861027	3	49436584	C	T	0.2316	0.2821	0.1988	2.943e-10	6.302	0.2673	0.7047	0.6049	0.1063	3.242e-06	0.007911	0.01167	0.07977	7.92903e-06	0.8096	0.685814	intronic	ENSG00000290318;RHOA	.	.	.
3	rs7648995	3	49438803	C	T	0.2316	0.2821	0.1988	3.298e-10	6.284	0.2415	0.7047	0.6049	0.1063	3.456e-06	0.007911	0.01276	0.0841	7.92903e-06	0.8097	0.685814	intronic	ENSG00000290318;RHOA	.	.	.
3	rs2140270	3	49439440	G	A	0.2316	0.2821	0.1988	3.173e-10	-6.29	0.2338	0.7047	0.6078	0.1063	3.471e-06	0.007911	0.01245	0.08416	7.92903e-06	0.8097	0.685814	intronic	ENSG00000290318;RHOA	.	.	.
3	rs62259947	3	49439924	C	T	0.2316	0.1021	0.1744	3.384e-10	-6.28	0.2851	0.3867	0.8867	0.6135	4.318e-06	0.008446	0.01211	0.08194	7.92903e-06	0.8614	0.52895	intronic	ENSG00000290318;RHOA	.	.	.
3	rs13061396	3	49444904	C	T	0.2326	0.413	0.2104	7.894e-10	6.147	0.3517	0.9841	0.4472	0.68	3.162e-06	0.01059	0.007498	0.6605	7.89423e-06	0.8297	0.709631	intronic	ENSG00000290318;RHOA	.	.	.
3	rs7620024	3	49451691	G	A	0.2316	0.2829	0.1988	7.68e-10	6.151	0.2285	0.7033	0.5925	0.1246	3.832e-06	0.00813	0.01219	0.08544	7.89369e-06	0.9058	0.685522	intronic	TCTA	.	.	.
3	rs8897	3	49460407	C	T	0.2316	0.2844	0.1974	3.022e-10	6.298	0.2655	0.7703	0.6249	0.1134	4.72e-06	0.008405	0.0113	0.08743	7.89369e-06	0.7963	0.712086	UTR3	NICN1	ENST00000273598.8_7:c.*1859G>A;ENST00000615713.4_6:c.*1203G>A	.	.
3	rs6446275	3	49466871	G	A	0.2316	0.2829	0.1988	7.176e-10	-6.162	0.2194	0.6931	0.593	0.1093	4.395e-06	0.007966	0.01118	0.09173	7.89369e-06	0.8092	0.684747	upstream	ENSG00000283189;NICN1	dist=112	.	.
3	rs62259933	3	49469703	G	A	0.2316	0.2821	0.1988	4.278e-10	6.244	0.2296	0.6621	0.6624	0.1235	6.143e-06	0.007975	0.01068	0.09375	7.89369e-06	0.8354	0.669461	intergenic	NICN1;DAG1	dist=2944;dist=36443	.	.
3	rs9654010	3	49480908	C	T	0.2316	0.2829	0.1988	4.079e-10	-6.251	0.249	0.6855	0.5798	0.1107	7.034e-06	0.007874	0.01102	0.09374	7.47498e-06	0.9017	0.684584	intergenic	NICN1;DAG1	dist=14149;dist=25238	.	.
3	rs138084484	3	49483193	C	T	0.2306	0.1014	0.1744	1.113e-09	6.092	0.4433	0.3502	0.9357	0.7044	5.019e-06	0.007651	0.0101	0.08751	7.47498e-06	0.8101	0.505518	intergenic	NICN1;DAG1	dist=16434;dist=22953	.	.
3	rs113741748	3	49490780	G	A	0.2316	0.2829	0.1988	1.671e-10	6.389	0.2679	0.6879	0.5706	0.1115	6.886e-06	0.007594	0.007992	0.09399	7.09643e-06	0.8365	0.684844	intergenic	NICN1;DAG1	dist=24021;dist=15366	.	.
3	rs9860055	3	49506900	C	T	0.2316	0.2829	0.1988	3.209e-10	6.288	0.2487	0.6912	0.5687	0.1125	4.074e-06	0.007553	0.009679	0.09302	9.95291e-06	0.8983	0.675157	intronic	DAG1	.	.	.
3	rs7613491	3	49508976	C	T	0.2316	0.1029	0.1744	3.481e-09	-5.907	0.3704	0.3928	0.8534	0.6492	5.318e-06	0.008912	0.01244	0.09315	1.00136e-05	0.929	0.530292	intronic	DAG1	.	.	.
3	rs7647973	3	49510931	G	A	0.2336	0.1006	0.1744	7.928e-10	6.146	0.3535	0.3854	0.8595	0.6593	8.156e-06	0.008679	0.01445	0.09242	9.97424e-06	0.8945	0.532825	intronic	DAG1	.	.	.
3	rs7355800	3	49516519	C	T	0.2316	0.2829	0.1988	6.075e-10	6.188	0.2659	0.6912	0.5675	0.11	6.987e-06	0.008581	0.01074	0.0962	1.11988e-05	0.9796	0.684755	intronic	DAG1	.	.	.
3	rs62261183	3	49522458	C	T	0.2316	0.2829	0.1988	3.189e-09	5.922	0.2633	0.6921	0.5765	0.1088	7.509e-06	0.008614	0.01162	0.09627	9.32932e-06	0.9693	0.684614	intronic	DAG1	.	.	.
3	rs74471041	3	49542543	G	T	0.2316	0.2829	0.1988	3.951e-10	-6.256	0.2311	0.6162	0.5674	0.109	1.472e-05	0.007238	0.009631	0.1002	9.41348e-06	0.9732	0.722881	intronic	DAG1	.	.	.
3	rs9871024	3	49554241	C	T	0.2316	0.2829	0.1988	4.376e-08	-5.475	0.2358	0.6672	0.5745	0.1201	0.01081	0.008673	0.008726	0.09883	9.39377e-06	0.8554	0.684246	intronic	DAG1	.	.	.
3	rs13322887	3	49555583	G	A	0.2316	0.2829	0.1988	4.332e-08	5.477	0.2369	0.6791	0.5811	0.1201	0.01024	0.008786	0.008758	0.09769	9.39312e-06	0.8584	0.677683	intronic	DAG1	.	.	.
3	rs4855838	3	49579876	G	A	0.2316	0.2837	0.1988	4.083e-08	5.487	0.2126	0.6619	0.6485	0.119	0.01151	0.00995	0.008408	0.09135	9.28988e-06	0.7047	0.667458	intergenic	DAG1;BSN-DT	dist=6825;dist=6863	.	.
3	rs4855837	3	49582677	C	T	0.2316	0.2829	0.1988	4.45e-08	5.472	0.2308	0.6772	0.6502	0.1184	0.01148	0.00967	0.009098	0.09041	9.28988e-06	0.6986	0.657254	intergenic	DAG1;BSN-DT	dist=9626;dist=4062	.	.
3	rs11130204	3	49584243	G	A	0.2326	0.2829	0.1988	4.979e-08	5.452	0.1877	0.6613	0.6191	0.1201	0.1897	0.0101	0.008239	0.09285	9.28881e-06	0.6576	0.66584	intergenic	DAG1;BSN-DT	dist=11192;dist=2496	.	.
3	rs2312462	3	49601255	C	T	0.2316	0.2837	0.1988	4.71e-08	5.462	0.1654	0.6763	0.8872	0.1127	0.181	0.00974	0.008262	0.08897	9.76922e-06	0.624	0.661538	intronic	BSN	.	.	.
3	rs9869120	3	49624065	C	T	0.1471	0.2821	0.1311	3.422e-08	5.518	0.0508	0.8583	0.5744	0.1631	0.0007922	0.1499	0.0006214	0.08549	0.000612435	0.99	0.662544	intronic	BSN	.	.	.	y
3	rs6446286	3	49681704	G	A	0.166	0.2905	0.1398	3.665e-08	5.506	0.1311	0.7522	0.5549	0.1935	0.0009215	0.2441	0.0002546	0.145	0.000887401	0.7112	0.748794	intronic	BSN	.	.	.
4	rs6824152	4	46915161	C	T	0.4642	0.5363	0.4078	1.927e-08	-5.618	0.2839	0.5392	0.04891	0.06694	2.793e-07	0.00685	0.8178	0.3267	0.000710003	0.4037	0.215311	intergenic	COX7B2;GABRA4	dist=3899;dist=5756	.	.	y
5	rs17685	7	75616105	G	A	0.2893	0.1702	0.2075	9.5e-09	-5.739	0.5241	0.6923	0.8889	0.5769	2.896e-06	5.712e-05	0.00873	0.03732	0.427716	0.01446	0.937332	UTR3	POR	ENST00000706544.1_1:c.*306G>A;ENST00000461988.6_5:c.*306G>A;ENST00000706545.1_1:c.*306G>A;ENST00000706546.1_1:c.*306G>A;ENST00000706547.1_1:c.*306G>A;ENST00000394893.5_2:c.*542G>A;ENST00000475509.2_2:c.*306G>A;ENST00000439269.1_1:c.*306G>A	.	.	y
6	rs2189012	7	114211912	G	A	0.3757	0.1278	0.2349	5.257e-09	5.839	0.4672	0.7354	0.05109	0.9758	0.07483	0.9654	2.099e-06	0.005825	0.0268269	0.4	0.164138	intronic	FOXP2	.	.	.	y
7	rs4444109	11	112854309	G	T	0.2962	0.1936	0.4236	3.583e-10	6.271	0.03748	0.08611	0.1965	0.227	2.942e-05	1.177e-05	0.0573	0.03443	0.129707	0.2427	0.198299	intronic	NCAM1	.	.	.	y
8	rs12360992	11	113262900	C	A	0.4682	0.9592	0.6873	4.005e-13	7.255	0.002608	0.974	0.2242	0.8132	0.001581	0.0001799	0.03997	0.006436	6.77174e-07	0.685	0.283224	intronic	ANKK1	.	.	.
8	rs35023999	11	113266411	C	A	0.496	0.9607	0.6988	3.407e-13	7.277	0.003102	0.7244	0.3235	0.7003	3.191e-06	0.0004972	0.00845	0.01786	4.03962e-07	0.5057	0.170679	intronic	ANKK1	.	.	.
8	rs10891547	11	113267218	C	A	0.499	0.9607	0.6974	1.326e-13	-7.403	0.003502	0.6971	0.3431	0.7267	4.899e-06	0.0003761	0.01108	0.01706	3.8249e-07	0.5177	0.160146	intronic	ANKK1	.	.	.
8	rs10891548	11	113267259	G	A	0.499	0.9607	0.6974	1.637e-13	-7.375	0.00363	0.7478	0.343	0.7271	5.045e-06	0.0003783	0.01109	0.01768	3.8249e-07	0.5177	0.172512	intronic	ANKK1	.	.	.
8	rs11604671	11	113268059	G	A	0.499	0.9607	0.6974	1.929e-13	-7.354	0.004006	0.8925	0.3603	0.7346	7.135e-06	0.0004168	0.00984	0.01447	3.7436e-07	0.5316	0.167097	exonic	ANKK1	.	nonsynonymous SNV	ANKK1:ENST00000303941.4_3:exon6:c.G952A:p.G318R
8	rs2734849	11	113270160	G	A	0.496	0.8956	0.6902	6.239e-14	7.503	0.01411	0.5434	0.4188	0.2338	7.035e-06	0.0003804	0.007148	0.03549	3.596e-07	0.3514	0.114097	exonic	ANKK1	.	synonymous SNV	ANKK1:ENST00000303941.4_3:exon8:c.A1469A:p.H490H
8	rs12363125	11	113285916	C	T	0.3877	0.9062	0.6282	2.98e-15	-7.892	0.003182	0.9096	0.06479	0.3548	1.904e-07	3.003e-05	0.01146	0.004523	1.86496e-07	0.1747	0.103822	intronic	DRD2	.	.	.
8	rs2734839	11	113286490	C	T	0.3867	0.6657	0.611	1.971e-15	-7.943	0.03921	0.5558	0.3373	0.7168	3.175e-07	3.9e-05	0.01034	0.004776	1.69664e-07	0.2067	0.109269	intronic	DRD2	.	.	.
8	rs2734838	11	113286501	G	A	0.3877	0.8525	0.6239	4.947e-17	8.388	0.001376	0.4645	0.09618	0.3379	1.927e-07	2.789e-05	0.01266	0.004574	1.69422e-07	0.2368	0.142554	intronic	DRD2	.	.	.
8	rs2734837	11	113286829	C	T	0.3867	0.6657	0.611	2.115e-15	-7.934	0.04639	0.5358	0.3961	0.7098	3.064e-07	3.888e-05	0.01046	0.005314	1.69652e-07	0.1508	0.108253	intronic	DRD2	.	.	.
8	rs1107162	11	113289037	G	A	0.3877	0.8502	0.6239	1.139e-16	-8.289	0.00108	0.4411	0.06446	0.3598	2.348e-07	2.82e-05	0.01376	0.005049	1.69602e-07	0.1613	0.141839	intronic	DRD2	.	.	.
8	rs2734835	11	113291343	G	T	0.3867	0.9107	0.6268	5.896e-16	8.091	0.003752	0.8653	0.1053	0.3301	4.099e-07	3.985e-05	0.01267	0.004631	1.33829e-07	0.1018	0.132751	intronic	DRD2	.	.	.
8	rs1800498	11	113291588	G	A	0.3867	0.8525	0.6225	2.499e-16	-8.195	0.000774	0.4519	0.07331	0.379	4.245e-07	3.058e-05	0.01354	0.005134	1.01018e-07	0.1607	0.155382	intronic	DRD2	.	.	.
8	rs2734833	11	113292920	G	A	0.3867	0.7708	0.6182	1.84e-14	-7.661	0.1578	0.4123	0.2131	0.6988	5.375e-07	3.1e-05	0.01216	0.003758	2.30861e-07	0.1336	0.110288	intronic	DRD2	.	.	.
8	rs2734832	11	113293501	G	A	0.3867	0.9002	0.6268	1.149e-16	8.288	0.0007693	0.6726	0.06505	0.3498	3.733e-07	3.465e-05	0.01187	0.003796	1.02419e-07	0.1077	0.141377	intronic	DRD2	.	.	.
8	rs2734831	11	113293596	G	T	0.3867	0.8979	0.6254	9.68e-17	8.309	0.0004844	0.6914	0.05368	0.3085	3.804e-07	3.466e-05	0.01241	0.003779	1.02407e-07	0.1068	0.140211	intronic	DRD2	.	.	.
8	rs11608185	11	113294976	C	T	0.3877	0.8427	0.6225	2.507e-16	8.195	0.01611	0.3076	0.04623	0.274	4.712e-07	2.962e-05	0.01298	0.004506	9.84283e-08	0.1763	0.183045	intronic	DRD2	.	.	.
8	rs1076563	11	113295909	C	A	0.3877	0.8449	0.6239	2.177e-16	8.212	0.0001755	0.3282	0.04223	0.2907	4.275e-07	3.468e-05	0.01282	0.006769	1.31883e-07	0.1863	0.154182	intronic	DRD2	.	.	.
8	rs1116313	11	113296107	G	A	0.3877	0.8434	0.6239	2.389e-17	8.473	0.0001663	0.2766	0.0469	0.2668	4.699e-07	3.407e-05	0.01242	0.004721	1.30608e-07	0.1753	0.145297	intronic	DRD2	.	.	.	y
8	rs12798900	11	113298996	G	T	0.3946	0.9145	0.6311	4.639e-16	-8.121	0.002388	0.8085	0.09864	0.3674	2.864e-07	5.281e-05	0.02075	0.002446	8.4155e-07	0.1086	0.111902	intronic	DRD2	.	.	.
8	rs7131627	11	113299829	G	A	0.3946	0.8449	0.6268	1.959e-16	-8.225	0.0008951	0.5194	0.2801	0.4552	4.18e-07	7.058e-05	0.02219	0.002536	8.61271e-07	0.1254	0.0742926	intronic	DRD2	.	.	.
8	rs7131440	11	113299910	C	T	0.3946	0.8449	0.6268	1.822e-16	-8.233	0.0009254	0.519	0.2787	0.4516	4.27e-07	7.071e-05	0.02199	0.002314	8.6149e-07	0.1255	0.0747111	intronic	DRD2	.	.	.
8	rs7131465	11	113300022	C	A	0.3946	0.8449	0.6268	8.09e-16	8.053	0.0008918	0.5154	0.2914	0.4493	3.905e-07	6.922e-05	0.02309	0.002509	8.63615e-07	0.124	0.0762612	intronic	DRD2	.	.	.
8	rs7131681	11	113300052	C	T	0.3946	0.8442	0.6268	7.439e-16	-8.063	0.000855	0.5164	0.3004	0.4437	4.028e-07	7.278e-05	0.02189	0.002342	8.61549e-07	0.1252	0.0758232	intronic	DRD2	.	.	.
8	rs11214605	11	113300601	C	T	0.3946	0.9145	0.6311	3.562e-15	-7.869	0.003166	0.8577	0.0767	0.3677	3.461e-07	5.752e-05	0.02454	0.002371	8.61331e-07	0.1045	0.109481	intronic	DRD2	.	.	.
8	rs12800853	11	113302514	C	T	0.3946	0.9312	0.634	9.27e-15	-7.749	0.008475	0.8406	0.08265	0.2361	1.73e-07	8.588e-05	0.01688	0.002216	7.21373e-07	0.09219	0.189376	intronic	DRD2	.	.	.
8	rs7122246	11	113304457	G	A	0.3867	0.9304	0.6311	4.331e-15	-7.845	0.01041	0.9185	0.09943	0.221	1.344e-06	0.0001262	0.01424	0.004635	1.23883e-07	0.0939	0.168994	intronic	DRD2	.	.	.
8	rs12364051	11	113305314	G	A	0.3847	0.8283	0.6225	6.052e-16	8.088	0.001157	0.4607	0.4958	0.4883	1.004e-06	0.0001032	0.01478	0.004301	1.27295e-07	0.1106	0.0864321	intronic	DRD2	.	.	.
8	rs7934649	11	113372671	C	T	0.3588	0.1596	0.2939	1.132e-13	7.425	0.06822	0.9202	0.349	0.7182	1.189e-12	0.006873	0.1797	2.877e-05	0.00531312	0.01569	0.176992	intergenic	DRD2;TMPRSS5	dist=26551;dist=185598	.	.	y
8	rs6589379	11	113374567	G	T	0.3588	0.1596	0.2939	4.717e-13	7.233	0.08543	0.915	0.3488	0.7116	1.008e-12	0.006844	0.1733	2.689e-05	0.00532476	0.0165	0.177384	intergenic	DRD2;TMPRSS5	dist=28447;dist=183702	.	.
8	rs17532157	11	113516770	G	T	0.1004	0.0076	0.0937	8.183e-09	5.765	0.1216	0.1804	0.5255	0.3942	1.525e-05	0.002251	0.02145	0.4124	0.00182873	0.02657	0.0527811	intergenic	DRD2;TMPRSS5	dist=170650;dist=41499	.	.
8	rs17532479	11	113522981	C	T	0.1014	0.0076	0.0937	1.774e-09	-6.017	0.1289	0.171	0.4817	0.4365	1.517e-05	0.002271	0.02954	0.3542	0.00175788	0.03294	0.0568649	intergenic	DRD2;TMPRSS5	dist=176861;dist=35288	.	.
8	rs111614192	11	113525585	G	A	0.1034	0.0477	0.0994	6.967e-10	6.167	0.8138	0.1879	0.6568	0.06901	1.241e-05	0.002301	0.02977	0.401	0.00171431	0.01196	0.049419	intergenic	DRD2;TMPRSS5	dist=179465;dist=32684	.	.	y
8	rs17611093	11	113548309	C	T	0.1014	0.0076	0.0937	1.71e-09	-6.023	0.09073	0.171	0.5449	0.4365	1.675e-05	0.002032	0.02641	0.4346	0.0014973	0.02294	0.0568326	intergenic	DRD2;TMPRSS5	dist=202189;dist=9960	.	.
8	rs10891590	11	113586361	C	T	0.3648	0.0363	0.2435	1.847e-08	-5.626	0.07	0.7016	0.2719	0.6083	0.001208	0.06645	0.02331	0.1547	0.000260837	0.03066	0.087888	intergenic	TMPRSS5;ZW10	dist=9266;dist=17548	.	.	y
8	rs11604887	11	113602809	C	T	0.08847	0.0061	0.0764	9.233e-09	-5.744	0.151	0.1198	0.5627	0.3731	0.0001934	0.00413	0.01857	0.5333	0.000780962	0.02995	0.0972589	intergenic	TMPRSS5;ZW10	dist=25714;dist=1100	.	.
9	rs4245042	11	121517510	C	T	0.4344	0.0499	0.3934	1.239e-08	5.694	0.434	0.3821	0.1805	0.04159	4.93e-06	0.02624	0.005981	0.135	0.0438662	0.1802	0.109088	intergenic	SORL1;ENSG00000286044	dist=13038;dist=27459	.	.	y
10	rs6576010	14	104349602	G	A	0.3956	0.2239	0.3516	1.965e-11	6.709	0.08491	0.0851	0.6109	0.8518	1.96e-08	0.2171	0.07135	9.731e-05	0.000782618	0.9962	0.0347691	intergenic	ENSG00000287346;ATP5MJ	dist=2884;dist=29023	.	.
10	rs4900601	14	104358076	C	T	0.3817	0.1604	0.3329	1.092e-11	6.794	0.5475	0.01562	0.3349	0.3299	1.372e-07	0.1049	0.0801	9.548e-05	0.000339938	0.6644	0.0527145	intergenic	ENSG00000287346;ATP5MJ	dist=11358;dist=20549	.	.	y
11	rs1486901	15	47642993	G	A	0.3489	0.9289	0.4683	1.516e-10	6.404	0.3731	0.7245	0.001221	0.5993	4.907e-06	0.2827	0.02523	0.0001098	2.36499e-07	0.7859	0.373049	intronic	SEMA6D	.	.	.
11	rs531595	15	47643253	G	A	0.3638	0.9297	0.4769	6.501e-12	6.868	0.5701	0.6365	0.001788	0.5853	1.034e-05	0.2495	0.005927	2.012e-05	1.72477e-07	0.6079	0.434136	intronic	SEMA6D	.	.	.
11	rs653298	15	47644409	G	T	0.3638	0.9297	0.4769	1.075e-12	7.121	0.5521	0.6373	0.001788	0.5854	9.469e-06	0.2528	0.005736	1.979e-05	1.51558e-07	0.6527	0.438776	intronic	SEMA6D	.	.	.
11	rs653749	15	47644528	G	A	0.3638	0.9289	0.4769	1.329e-12	-7.091	0.5885	0.64	0.001814	0.5659	1.172e-05	0.2525	0.005944	1.99e-05	1.72651e-07	0.6997	0.436565	intronic	SEMA6D	.	.	.
11	rs665751	15	47644963	C	T	0.3628	0.9297	0.4769	5.544e-13	7.211	0.5742	0.6601	0.002162	0.5862	1.153e-05	0.5752	0.005153	2.068e-05	1.72651e-07	0.7452	0.430448	intronic	SEMA6D	.	.	.
11	rs1496919	15	47645491	G	A	0.3638	0.9289	0.4769	7.165e-13	-7.176	0.6198	0.6646	0.001895	0.5852	1.102e-05	0.2853	0.005245	1.983e-05	1.72223e-07	0.7303	0.413885	intronic	SEMA6D	.	.	.
11	rs1390876	15	47645789	G	A	0.3638	0.9289	0.4769	3.111e-13	7.29	0.6215	0.6572	0.001803	0.5842	1.171e-05	0.5602	0.006076	2.012e-05	1.72631e-07	0.6699	0.422393	intronic	SEMA6D	.	.	.
11	rs1390877	15	47645892	C	T	0.3489	0.9281	0.4683	2.28e-11	6.687	0.415	0.7428	0.001232	0.5973	5.033e-06	0.3155	0.02348	0.000108	2.38046e-07	0.8629	0.374091	intronic	SEMA6D	.	.	.
11	rs955686	15	47645956	C	T	0.3638	0.9289	0.4769	2.416e-13	7.323	0.63	0.6572	0.001888	0.5833	1.089e-05	0.5602	0.005064	2.01e-05	1.72445e-07	0.6392	0.422393	intronic	SEMA6D	.	.	.
11	rs955685	15	47646032	G	A	0.3638	0.9289	0.4769	2.408e-13	-7.324	0.6098	0.6571	0.001889	0.5828	1.145e-05	0.5611	0.004816	2.063e-05	1.7185e-07	0.6128	0.422393	intronic	SEMA6D	.	.	.
11	rs590247	15	47647560	C	T	0.3559	0.9281	0.4697	5.068e-11	-6.569	0.3735	0.8854	0.0008478	0.6809	2.508e-05	0.286	0.02144	9.487e-05	2.80098e-07	0.9362	0.507733	intronic	SEMA6D	.	.	.
11	rs591143	15	47647755	C	T	0.3708	0.9289	0.4784	3.726e-10	-6.265	0.5721	0.803	0.002844	0.6493	0.05382	0.715	0.004934	1.591e-05	2.02442e-07	0.697	0.581511	intronic	SEMA6D	.	.	.
11	rs281274	15	47659445	C	T	0.3628	0.944	0.464	1.317e-12	-7.093	0.09208	0.5783	0.006012	0.6419	1.472e-05	0.2659	0.0323	1.794e-05	3.10899e-08	0.7019	0.582887	ncRNA_intronic	ENSG00000259221	.	.	.
11	rs281280	15	47661369	G	A	0.3618	0.9448	0.464	2.403e-12	-7.009	0.0733	0.559	0.005274	0.7004	8.882e-06	0.267	0.02896	2.074e-05	3.10899e-08	0.6955	0.60213	ncRNA_intronic	ENSG00000259221	.	.	.
11	rs281258	15	47672201	C	T	0.3638	0.941	0.4683	4.136e-13	-7.251	0.03801	0.3674	0.005507	0.5828	7.53e-06	0.2966	0.01992	2.529e-05	3.07971e-08	0.7062	0.56301	ncRNA_intronic	ENSG00000259221	.	.	.
11	rs281259	15	47672312	C	T	0.3638	0.941	0.4683	6.581e-13	-7.188	0.03796	0.3674	0.005509	0.5825	6.854e-06	0.2963	0.0204	1.606e-05	3.06577e-08	0.6882	0.56301	ncRNA_intronic	ENSG00000259221	.	.	.
11	rs281260	15	47673928	C	T	0.3638	0.941	0.4683	9.275e-14	-7.451	0.03698	0.3629	0.005339	0.6179	4.895e-06	0.2984	0.02078	2.893e-05	2.64911e-08	0.7114	0.567149	ncRNA_intronic	ENSG00000259221	.	.	.
11	rs175979	15	47674812	G	A	0.3638	0.941	0.4683	1.428e-14	7.694	0.03483	0.3714	0.004581	0.6565	2.17e-06	0.29	0.01988	1.895e-05	1.97843e-08	0.7174	0.562895	ncRNA_intronic	ENSG00000259221	.	.	.	y
11	rs281264	15	47675569	G	A	0.3439	0.9327	0.4597	1.58e-12	-7.067	0.05309	0.2324	0.03288	0.8146	1.223e-05	0.2842	0.01041	7.196e-05	1.95862e-08	0.7061	0.374038	ncRNA_intronic	ENSG00000259221	.	.	.
11	rs281265	15	47675602	C	A	0.3439	0.9327	0.4597	2.388e-14	-7.628	0.05548	0.2325	0.0329	0.8145	1.262e-05	0.2844	0.01044	9.012e-05	1.95686e-08	0.7029	0.374038	ncRNA_intronic	ENSG00000259221	.	.	.
11	rs7175414	15	47676200	G	A	0.2068	0.264	0.2233	4.269e-11	6.594	0.5385	0.7858	0.8185	0.635	4.596e-06	0.2195	0.01288	0.0005339	1.89535e-08	0.05122	0.835893	ncRNA_intronic	ENSG00000259221	.	.	.
11	rs7174964	15	47676228	C	A	0.2068	0.264	0.2233	3.723e-11	-6.615	0.5385	0.7858	0.8185	0.6346	4.532e-06	0.2195	0.01293	0.000466	1.72179e-08	0.04931	0.835893	ncRNA_intronic	ENSG00000259221	.	.	.
11	rs6493274	15	47676489	C	A	0.2068	0.264	0.2233	1.249e-11	-6.774	0.5442	0.7844	0.8266	0.636	4.368e-06	0.2194	0.01277	0.0004404	1.90029e-08	0.04931	0.836204	ncRNA_intronic	ENSG00000259221	.	.	.
11	rs8040191	15	47676716	C	T	0.2068	0.2648	0.2233	3.12e-11	6.641	0.5423	0.7842	0.8899	0.6092	5.388e-06	0.2188	0.01395	0.0004591	2.11252e-08	0.04927	0.836534	ncRNA_intronic	ENSG00000259221	.	.	.
11	rs8040226	15	47676830	G	A	0.2068	0.2648	0.2233	2.577e-11	-6.669	0.5753	0.7611	0.8652	0.6176	5.632e-06	0.2196	0.01358	0.0005899	1.91113e-08	0.05122	0.837062	ncRNA_intronic	ENSG00000259221	.	.	.
11	rs8041603	15	47676855	C	T	0.2068	0.264	0.2233	1.823e-11	-6.72	0.5722	0.7722	0.8203	0.6191	5.547e-06	0.2202	0.01301	0.0005952	1.91113e-08	0.05076	0.840079	ncRNA_intronic	ENSG00000259221	.	.	.
11	rs2433018	15	47677596	G	A	0.3111	0.9054	0.4438	2.025e-10	-6.359	0.8257	0.9047	0.1773	0.5898	0.0001201	0.2801	0.05049	0.0001802	9.35233e-09	0.7961	0.401332	ncRNA_intronic	ENSG00000259221	.	.	.
11	rs7166534	15	47678132	C	T	0.2068	0.264	0.2233	6.767e-11	-6.526	0.6067	0.7841	0.8008	0.6264	5.873e-06	0.2186	0.01247	0.0005664	1.91113e-08	0.05046	0.836421	ncRNA_intronic	ENSG00000259221	.	.	.
11	rs4485292	15	47678898	G	A	0.2068	0.264	0.2233	4.909e-11	6.574	0.6694	0.7826	0.7967	0.6455	6.274e-06	0.2252	0.01274	0.0006589	1.91113e-08	0.04634	0.834696	ncRNA_intronic	ENSG00000259221	.	.	.
11	rs12904595	15	47679524	C	T	0.2068	0.264	0.2233	5.678e-11	-6.552	0.5679	0.8139	0.7986	0.666	2.525e-06	0.233	0.01291	0.0006269	1.91113e-08	0.04251	0.839348	ncRNA_intronic	ENSG00000259221	.	.	.
11	rs2132661	15	47679726	G	A	0.2068	0.264	0.2233	8.105e-11	-6.499	0.5654	0.7678	0.7978	0.674	2.198e-06	0.2329	0.0129	0.0006273	1.91113e-08	0.04204	0.838137	ncRNA_intronic	ENSG00000259221	.	.	.
11	rs2132660	15	47679807	G	A	0.2068	0.264	0.2233	4.198e-11	-6.597	0.5755	0.7564	0.7978	0.6684	2.222e-06	0.2315	0.0129	0.0006279	1.91113e-08	0.04234	0.844067	ncRNA_intronic	ENSG00000259221	.	.	.
11	rs8032333	15	47680567	G	A	0.2068	0.264	0.2233	2.496e-11	-6.674	0.4706	0.7857	0.8135	0.6698	2.852e-06	0.2127	0.013	0.0005789	1.90673e-08	0.04531	0.791168	ncRNA_intronic	ENSG00000259221	.	.	.
11	rs35473814	15	47680662	G	A	0.2068	0.264	0.2233	1.44e-11	6.754	0.4366	0.7412	0.8148	0.6695	2.92e-06	0.2643	0.01297	0.000581	1.90042e-08	0.04284	0.843537	ncRNA_intronic	ENSG00000259221	.	.	.
11	rs34794623	15	47680801	C	A	0.2068	0.264	0.2233	1.489e-11	6.749	0.4635	0.7422	0.8092	0.6689	2.919e-06	0.2643	0.01291	0.0005822	1.8978e-08	0.04082	0.843537	ncRNA_intronic	ENSG00000259221	.	.	.
11	rs35175834	15	47680815	G	A	0.2068	0.264	0.2233	1.106e-11	6.792	0.4568	0.742	0.8095	0.6692	2.913e-06	0.2643	0.0129	0.0005372	1.89644e-08	0.04169	0.842576	ncRNA_intronic	ENSG00000259221	.	.	.	y
11	rs281286	15	47681250	C	T	0.3479	0.9153	0.4568	6.991e-12	-6.858	0.1288	0.1132	0.005557	0.5152	1.321e-05	0.2954	0.01581	4.249e-05	1.76104e-07	0.7336	0.363343	ncRNA_intronic	ENSG00000259221	.	.	.
11	rs281287	15	47681552	G	A	0.3559	0.9327	0.4597	1.044e-12	-7.125	0.06296	0.1461	0.0202	0.8128	6.294e-06	0.2848	0.009344	4.411e-05	8.69581e-08	0.6485	0.384301	ncRNA_intronic	ENSG00000259221	.	.	.
11	rs281293	15	47683333	G	A	0.3489	0.9289	0.4582	1.456e-11	6.752	0.1034	0.1542	0.02624	0.7005	1.211e-05	0.3056	0.01807	5.626e-05	1.71333e-07	0.6908	0.376748	ncRNA_intronic	ENSG00000259221	.	.	.
11	rs34488670	15	47684936	C	T	0.2068	0.2587	0.2233	2.451e-11	-6.676	0.9919	0.7165	0.7444	0.6342	2.648e-06	0.2327	0.01041	0.001157	1.73524e-08	0.03212	0.886102	ncRNA_intronic	ENSG00000259221	.	.	.
12	rs77354823	18	26578748	C	T	0.2942	0.1263	0.2666	3.611e-08	-5.509	0.2074	0.43	0.9842	0.6802	0.06871	0.2219	0.03243	2.392e-06	0.00103949	0.8427	0.730322	intergenic	ENSG00000265994;RNU6-408P	dist=209204;dist=49836	.	.	y

## Sheet: S8.other.pr.changing.SNPs
rsID	chr	pos	non_effect_allele	effect_allele	meta.P	r2	IndSigSNP	nearestGene	func	ExonicFunc.ensGene	AAChange.ensGene	meta-analysis
rs61785974	1	28800380	C	A	1.926e-07	0.995211	rs4654363	PHACTR4	exonic	nonsynonymous SNV	PHACTR4:ENST00000373836.4_2:exon6:c.C1168A:p.L390I,PHACTR4:ENST00000373839.8_7:exon7:c.C1138A:p.L380I	EA
rs3736781	6	26505362	G	A	1.351e-07	0.641355	rs1796520	BTN1A1	exonic	nonsynonymous SNV	BTN1A1:ENST00000244513.10_1:exon3:c.G637A:p.A213T,BTN1A1:ENST00000684113.1_1:exon4:c.G637A:p.A213T	EA
rs1057868	7	75615006	C	T	7.345e-08	0.783973	rs6467958	POR	exonic	nonsynonymous SNV	POR:ENST00000439269.1_1:exon7:c.C722T:p.A241V,POR:ENST00000706544.1_1:exon12:c.C1409T:p.A470V,POR:ENST00000394893.5_2:exon13:c.C1499T:p.A500V,POR:ENST00000461988.6_5:exon13:c.C1499T:p.A500V,POR:ENST00000475509.2_2:exon13:c.C1283T:p.A428V,POR:ENST00000706545.1_1:exon14:c.C1508T:p.A503V,POR:ENST00000706546.1_1:exon14:c.C1508T:p.A503V,POR:ENST00000706547.1_1:exon15:c.C1508T:p.A503V	EA
rs6720	7	75677504	C	T	1.419e-07	0.817516	rs8565	MDH2	exonic	nonsynonymous SNV	MDH2:ENST00000315758.10_3:exon1:c.C26T:p.A9V,MDH2:ENST00000432020.2_1:exon1:c.C26T:p.A9V,MDH2:ENST00000461263.2_1:exon1:c.C26T:p.A9V	EA_LA
rs6720	7	75677504	C	T	1.499e-07	0.813967	rs6467958	MDH2	exonic	nonsynonymous SNV	MDH2:ENST00000315758.10_3:exon1:c.C26T:p.A9V,MDH2:ENST00000432020.2_1:exon1:c.C26T:p.A9V,MDH2:ENST00000461263.2_1:exon1:c.C26T:p.A9V	EA
rs589292	9	127818276	C	T	1.854e-06	0.98641	rs12380310	SCAI	exonic	nonsynonymous SNV	SCAI:ENST00000336505.11_6:exon3:c.G109A:p.A37T,SCAI:ENST00000373549.8_4:exon4:c.G178A:p.A60T	EA
rs7118900	11	113266821	G	A	1.624e-06	0.669372	rs7350522	ANKK1	exonic	nonsynonymous SNV	ANKK1:ENST00000303941.4_3:exon5:c.G715A:p.A239T	EA
rs1800497	11	113270828	G	A	1.085e-07	0.731795	rs7350522	ANKK1	exonic	nonsynonymous SNV	ANKK1:ENST00000303941.4_3:exon8:c.G2137A:p.E713K	EA
rs11601425	11	113570385	C	T	1.666e-07	0.801529	rs73004038	TMPRSS5	exonic	nonsynonymous SNV	TMPRSS5:ENST00000538955.5_4:exon2:c.G5A:p.R2Q,TMPRSS5:ENST00000544476.1_4:exon2:c.G5A:p.R2Q,TMPRSS5:ENST00000299882.11_10:exon3:c.G137A:p.R46Q,TMPRSS5:ENST00000544634.5_4:exon3:c.G137A:p.R46Q,TMPRSS5:ENST00000545579.6_5:exon3:c.G110A:p.R37Q	EA
rs602662	19	49206985	G	A	1.184e-07	0.622568	rs1231281	FUT2	exonic	nonsynonymous SNV	FUT2:ENST00000391876.5_1:exon2:c.G772A:p.G258S,FUT2:ENST00000425340.3_3:exon2:c.G772A:p.G258S	EA
rs2287922	19	49232226	G	A	1.3e-07	0.897612	rs1231281	RASIP1	exonic	nonsynonymous SNV	RASIP1:ENST00000222145.9_7:exon5:c.C1801T:p.R601C	EA

## Sheet: S9.EA.MAGMA
GENE	CHR	START	STOP	NSNPS	NPARAM	N	ZSTAT	P	sig
CTD-2134A5.4	14	104319702	104347448	17	5	1134712	7.9004	1.3901e-15	y
PDE4B	1	66257196	66841262	342	26	1140622	7.804	2.998e-15	y
DRD2	11	113279326	113347120	73	13	1313577	7.3233	1.2096e-13	y
PPP1R13B	14	104198531	104314912	106	5	1168435	7.2754	1.727e-13	y
NCAM1	11	112830968	113150158	175	19	1254477	7.2194	2.61e-13	y
ANKK1	11	113257500	113272138	27	7	1260965	7.0878	6.811e-13	y
SEMA6D	15	47475297	48067425	451	32	1219430	6.9051	2.5091e-12	y
RP11-73M18.6	14	104152912	104155464	3	3	1308629	6.9003	2.595e-12	y
KLC1	14	104094513	104181586	57	5	1277103	6.7702	6.4314e-12	y
FOXP2	7	113725545	114334827	201	23	1161618	6.7663	6.6047e-12	y
RP11-159N11.3	11	113275042	113283839	22	5	1302389	6.7469	7.5522e-12	y
XRCC3	14	104162945	104182841	11	2	1201736	6.7308	8.436e-12	y
ZFYVE21	14	104181066	104201005	7	3	1017969	6.6738	1.246e-11	y
RP11-73M18.7	14	104159896	104162507	3	2	1254550	6.3972	7.915e-11	y
USP4	3	49313576	49378486	17	4	1280920	6.2818	1.673e-10	y
RP11-3B7.1	3	49296517	49299749	3	2	1317211	6.2259	2.394e-10	y
C3orf62	3	49305028	49315665	2	1	1308230	6.2155	2.5584e-10	y
ZNF131	5	43120015	43177426	38	8	1134445	6.2052	2.731e-10	y
RHOA-IT1	3	49401577	49405439	4	3	1305763	6.1874	3.059e-10	y
BTN3A1	6	26401464	26416436	9	3	1278204	6.162	3.591e-10	y
NICN1	3	49458765	49467759	8	3	1285062	6.139	4.153e-10	y
TMEM120A	7	75615148	75624934	12	4	1266746	6.1324	4.327e-10	y
LINC01833	2	45147215	45167338	9	4	1085096	6.105	5.14e-10	y
CTNND1	11	57519714	57588018	36	9	1289360	6.0688	6.444e-10	y
DALRD3	3	49051920	49059684	3	2	1324011	6.0643	6.626e-10	y
GPX1	3	49393606	49397038	4	2	1277488	6.0118	9.176e-10	y
BTN2A1	6	26457131	26477849	14	7	1296793	6.0032	9.6743e-10	y
RABEPK	9	127961820	127997440	23	4	1171983	5.9647	1.2258e-09	y
RHOA	3	49395571	49450971	54	6	1277662	5.9254	1.5581e-09	y
TCTA	3	49448855	49454909	7	3	1333751	5.8825	2.0209e-09	y
WDR6	3	49043494	49054386	3	3	1289834	5.88	2.051e-09	y
AMT	3	49453210	49460987	9	3	1311306	5.856	2.3704e-09	y
ARIH2	3	48955268	49024815	22	5	1246491	5.8407	2.5986e-09	y
AC068490.1	2	22155139	22760194	233	22	1097974	5.8388	2.6292e-09	y
SCAI	9	127703886	127906807	122	12	1134089	5.774	3.8709e-09	y
BTN2A3P	6	26420624	26433611	8	4	1307335	5.7701	3.9608e-09	y
USP19	3	49144478	49159371	6	2	1277173	5.7121	5.5806e-09	y
PPP6C	9	127907851	127953218	47	5	1259058	5.6985	6.0433e-09	y
RUNX1T1	8	92966199	93116514	79	4	1038095	5.6932	6.2337e-09	y
LAMB2	3	49157546	49171551	4	3	1230426	5.6876	6.44e-09	y
SLC25A20	3	48893358	48937337	20	4	1288739	5.6718	7.067e-09	y
BTN1A1	6	26499530	26511653	10	1	1363462	5.6349	8.759e-09	y
RASIP1	19	49222841	49244867	13	2	1267358	5.6324	8.8865e-09	y
RP11-894P9.2	14	104018757	104029214	7	1	1185138	5.6277	9.129e-09	y
NDUFAF3	3	49056891	49061928	1	1	1287797	5.6214	9.469e-09	y
IMPDH2	3	49060757	49067859	1	1	1287797	5.6214	9.469e-09	y
P4HTM	3	49026321	49045586	7	2	1257539	5.5991	1.0774e-08	y
CNOT4	7	135045546	135195893	46	8	1173721	5.5599	1.35e-08	y
STYXL1	7	75624655	75678321	52	7	1304769	5.5005	1.8937e-08	y
PRKAR2A	3	48783018	48886307	27	5	1305748	5.4763	2.1719e-08	y
SMIM15-AS1	5	60456896	60528867	51	6	1292136	5.4707	2.241e-08	y
HCG11	6	26520936	26528632	7	1	1284244	5.4277	2.855e-08	y
SIX3	2	45167840	45174210	3	2	976054	5.4136	3.088e-08	y
DAG1	3	49505145	49574051	65	6	1263822	5.3812	3.6998e-08	y
CADM2	3	85007139	86124579	745	25	1250823	5.3433	4.563e-08	y
BAG5	14	104021881	104029994	7	1	1265417	5.282	6.3903e-08	y
KLHDC8B	3	49208030	49214919	6	2	1317660	5.2673	6.924e-08	y
FUT2	19	49198227	49210208	33	6	1280796	5.2568	7.3278e-08	y
POR	7	75543404	75617173	41	9	1258701	5.2482	7.6779e-08	y
HMGN4	6	26537593	26548161	10	1	1319173	5.2159	9.1452e-08	y
IP6K2	3	48724435	48755711	12	3	1282188	5.1725	1.1551e-07	y
QRICH1	3	49066139	49132796	20	5	1247770	5.1628	1.2166e-07	y
TTC12	11	113184304	113255266	52	10	1108982	5.1511	1.2945e-07	y
BTN2A2	6	26382323	26396102	12	6	1273514	5.1038	1.6644e-07	y
TMX2	11	57479064	57509445	18	3	1268655	5.0757	1.9304e-07	y
OPRD1	1	29137681	29198779	50	7	1313622	5.0689	2.0006e-07	y
SYNGAP1	6	33386841	33422466	9	5	1336065	5.0686	2.004e-07	y
BSN	3	49590909	49709982	70	10	1275710	5.0493	2.2177e-07	y
CREB3L1	11	46298212	46343959	19	8	1155901	5.0429	2.293e-07	y
KLB	4	39407549	39454153	5	2	1213551	5.0359	2.3779e-07	y
ARHGAP15	2	143847930	144526921	211	31	1190058	5.022	2.5568e-07	y
GS1-5L10.1	8	92987135	92990646	1	1	944423	4.9971	2.91e-07	y
CTB-129P6.11	19	45452300	45458264	3	2	997583	4.9329	4.051e-07	y
VRK2	2	58133763	58388055	29	14	1178863	4.932	4.0698e-07	y
IZUMO1	19	49243108	49251166	4	2	992458	4.9264	4.187e-07	y
RPS8	1	45240211	45245451	1	1	1288936	4.8957	4.899e-07	y
SELENOH	11	57507962	57512022	3	1	1269525	4.8877	5.101e-07	y
LINC02057	5	60496132	60601633	54	9	1239569	4.8685	5.6226e-07	y
GMPPB	3	49753276	49762406	2	1	1294113	4.8641	5.7486e-07	y
BTN3A3	6	26439715	26454643	6	3	1293931	4.8598	5.8745e-07	y
MED27	9	134727314	134956254	18	5	1180645	4.8576	5.9409e-07	y
BTBD18	11	57509985	57521147	5	3	1252884	4.8512	6.1371e-07	y
CLPTM1	19	45456847	45497599	4	1	1067146	4.8503	6.163e-07	y
ZDHHC5	11	57434218	57469654	22	7	1282412	4.8403	6.4817e-07	y
BTN3A2	6	26364386	26379548	17	6	1312228	4.8396	6.5042e-07	y
BSN-AS1	3	49676915	49680202	1	1	1258064	4.8323	6.747e-07	y
LINC01830	2	22599465	22705876	30	8	1039381	4.8223	7.0956e-07	y
CDHR4	3	49827164	49838306	4	2	1266876	4.8152	7.3543e-07	y
RP11-667M19.10	11	113687798	113694180	4	1	1324184	4.7984	7.996e-07	y
TMPRSS5	11	113557268	113578095	16	5	1258684	4.76	9.6816e-07	y
QKI	6	163834674	164000624	85	5	1281848	4.7577	9.7901e-07	y
RCC1	1	28831454	28866812	7	6	1219682	4.7351	1.0945e-06	y
PHACTR4	1	28695250	28827876	150	9	1289067	4.7249	1.1509e-06	y
MED19	11	57470181	57480687	4	3	1190897	4.7247	1.152e-06	y
TSNARE1	8	143292440	143485543	113	14	1248345	4.7241	1.1558e-06	y
MDH2	7	75676368	75697826	38	5	1293333	4.7239	1.157e-06	y
AC096558.1	2	144052154	144356571	168	22	1195109	4.7205	1.1764e-06	y
BDNF	11	27675439	27744605	29	8	1257487	4.6906	1.3621e-06	y
BANK1	4	102340117	102996969	374	31	1160826	4.681	1.4276e-06	y
CLP1	11	57414660	57430337	11	3	1249751	4.6799	1.4353e-06	y
APEH	3	49710783	49722404	2	2	1304254	4.6666	1.531e-06	y
MST1	3	49720379	49727907	2	2	1275209	4.6634	1.555e-06	y
PRKAR2A-AS1	3	48884283	48890409	2	1	1363502	4.6626	1.561e-06	y
METTL15	11	28128794	28356054	44	7	1238774	4.6567	1.6065e-06	y
CCDC51	3	48472573	48482529	3	3	1248070	4.6539	1.6289e-06	y
RP13-131K19.2	3	49021481	49028421	1	1	1281835	4.6299	1.829e-06	y
EIF2B3	1	45315193	45453394	8	4	1321461	4.6184	1.9334e-06	y
TRAIP	3	49865033	49895007	8	4	1255690	4.597	2.1426e-06	y
MAMSTR	19	49214981	49223982	4	2	1261273	4.5872	2.2462e-06	y
TAF12	1	28913340	28975803	8	4	1219341	4.586	2.2592e-06	y
CACNA1C-AS4	12	2327650	2333645	9	2	1336798	4.577	2.3584e-06	y
IP6K1	3	49760726	49824975	13	4	1295387	4.5746	2.3861e-06	y
APOC2	19	45448291	45453822	6	3	1031034	4.5707	2.4306e-06	y
LINC00216	14	58753750	58756876	3	1	1122758	4.564	2.51e-06	y
RP11-24C3.2	3	48480761	48489060	4	3	1253076	4.5624	2.5288e-06	y
USP28	11	113667595	113747294	29	4	1277660	4.56	2.5572e-06	y
ADGRB2	1	32191717	32230941	4	1	1339058	4.5596	2.563e-06	y
LINC01122	2	58654014	59291901	79	26	1198684	4.5385	2.8321e-06	y
RP11-154H12.3	18	77551725	77577529	6	2	1299382	4.5353	2.8764e-06	y
KDM4B	19	4968123	5154609	153	18	1218143	4.5322	2.9186e-06	y
RABGAP1L	1	174127547	174965445	333	9	1207960	4.529	2.9637e-06	y
ARIH2OS	3	48954214	48957256	1	1	1258453	4.5272	2.989e-06	y
KIF2C	1	45204508	45234439	7	2	1236152	4.5132	3.1931e-06	y
LIN7C	11	27514964	27529316	3	2	1158021	4.5053	3.314e-06	y
KRI1	19	10662760	10677702	26	7	1254946	4.498	3.4297e-06
MYBPC3	11	47351956	47375253	10	5	1262068	4.4867	3.616e-06
LINC01012	6	27660805	27682485	8	4	1206161	4.4839	3.665e-06
RP11-522B15.3	15	96896575	96949465	1	1	1262188	4.4833	3.675e-06
ZNF184	6	27417521	27441897	58	7	1330228	4.477	3.7844e-06
RNF123	3	49725970	49759962	7	3	1265777	4.4659	3.9872e-06
RP11-629G13.1	11	112829022	112835130	3	3	1217568	4.456	4.1746e-06
NDUFS1	2	206978540	207025233	14	5	1319792	4.4554	4.1861e-06
GMEB1	1	28994289	29046865	33	5	1294355	4.4493	4.3085e-06
DDB2	11	47235524	47261768	12	3	1311256	4.4465	4.3634e-06
PSMA3-AS1	14	58731082	58765851	21	2	1071014	4.4459	4.376e-06
UBA7	3	49841641	49852386	2	1	1239403	4.4354	4.595e-06
SLC39A13	11	47427682	47439047	3	1	1305659	4.4258	4.804e-06
ASPG	14	104551027	104582919	1	1	1289176	4.4068	5.246e-06
MSI2	17	55332211	55763050	82	33	1255459	4.4049	5.2925e-06
ATG4D	19	10653579	10665094	10	4	1284090	4.3917	5.623e-06
ZW10	11	113602908	113645414	17	6	1169585	4.3855	5.7863e-06
NUP160	11	47798638	47871107	35	5	1289852	4.3716	6.1682e-06
FUT1	19	49250267	49256898	7	3	1092318	4.3642	6.3807e-06
CCDC71	3	49198967	49204764	1	1	1057609	4.3618	6.451e-06
CUL3	2	225333866	225451114	164	7	1148790	4.3407	7.1003e-06
CDKN2D	19	10676135	10680735	10	3	1285108	4.3087	8.2091e-06
AKIRIN2	6	88383577	88412951	25	6	1213542	4.2962	8.688e-06
EFL1	15	82421546	82556114	123	15	1276643	4.288	9.0132e-06
CACNA1C-IT3	12	2377941	2399103	2	1	1344874	4.2853	9.124e-06
LINC00968	8	57405867	57473382	38	8	1072006	4.2802	9.3351e-06
GAPVD1	9	128023104	128130486	64	6	1020783	4.28	9.3443e-06
HERC1	15	63899816	64127147	28	7	1244338	4.2796	9.3613e-06
GRK4	4	2964297	3043487	26	4	1208823	4.2793	9.372e-06
AC009487.5	2	162279525	162286285	2	2	1308803	4.2608	1.0186e-05
CPEB1-AS1	15	83315520	83362572	20	6	1293049	4.2586	1.0284e-05
DUSP3	17	41842492	41857345	18	3	1313180	4.2571	1.0356e-05
CARD10	22	37885399	37916549	43	10	1303177	4.2535	1.0523e-05
KCNAB3	17	7824176	7834174	5	3	1284245	4.2525	1.0572e-05
SLC7A5	16	87862628	87904113	41	6	1174853	4.2401	1.117e-05
ACSS3	12	81470835	81655989	244	18	1290519	4.2384	1.1258e-05
MIRLET7BHG	22	46480876	46510808	2	2	1269307	4.237	1.1328e-05
BDNF-AS	11	27527393	27720718	71	12	1240174	4.2302	1.1672e-05
NTM	11	131239372	132207716	267	54	1219772	4.2282	1.178e-05
KCNG2	18	77556937	77661100	60	8	1219409	4.2176	1.2345e-05
GABRA4	4	46919916	46996598	68	10	1129451	4.1984	1.3438e-05
DHODH	16	72041486	72062563	20	5	1216451	4.1911	1.3883e-05
XPO7	8	21776172	21865096	46	5	1155286	4.1894	1.3984e-05
SAP130	2	128697790	128786694	26	6	1085943	4.1884	1.4043e-05
CRTC2	1	153919150	153932088	6	1	1301610	4.1821	1.4443e-05
CACNA1C	12	2078937	2808116	154	32	1262865	4.1773	1.4749e-05
RP11-587D21.4	11	27716858	27900195	128	18	1268968	4.1763	1.4817e-05
CSTF3	11	33105129	33184077	61	4	1267833	4.1706	1.5187e-05
AP3B2	15	83327032	83379671	21	9	1276456	4.1682	1.5351e-05
THSD7B	2	137522114	138436288	213	24	1166373	4.1661	1.5493e-05
RSRC1	3	157822643	158264519	273	9	1291495	4.1651	1.5559e-05
MPP3	17	41877166	41911514	19	2	1244271	4.1591	1.5972e-05
PELO	5	52082749	52100878	5	1	1312657	4.1579	1.6059e-05
TMEM17	2	62726352	62734330	12	2	1275498	4.1575	1.6089e-05
LINC01226	1	31970826	32049907	154	8	1262971	4.1563	1.6175e-05
HS6ST3	13	96741360	97492816	355	22	1185185	4.1515	1.6516e-05
RP11-23I7.1	1	204631999	204634741	1	1	1342602	4.1502	1.661e-05
CHD3	17	7787113	7817078	10	2	1284814	4.1474	1.681e-05
SRFBP1	5	121296669	121365328	50	3	1307968	4.1428	1.7155e-05
HPR	16	72096124	72112145	12	5	1192141	4.1346	1.7782e-05
ERC2	3	55541338	56503495	430	31	1273205	4.1331	1.7892e-05
AC092155.4	2	62759815	62890954	79	12	1174957	4.1319	1.7989e-05
SPATS2L	2	201169615	201347987	42	13	1308100	4.1118	1.9633e-05
MED18	1	28654550	28663476	2	1	1184788	4.1089	1.988e-05
INO80D	2	206857444	206951898	36	6	1313072	4.1044	2.0265e-05
TDRD9	14	104393792	104520004	30	9	1241386	4.0947	2.1133e-05
DPYD	1	97542298	98387605	262	42	1214020	4.0945	2.1151e-05
ARID4A	14	58764221	58841605	39	4	1095910	4.0914	2.1442e-05
LINC00381	13	74992294	75019872	7	3	1276171	4.0874	2.1813e-05
ORC3	6	88298784	88378171	22	4	1283182	4.0802	2.2496e-05
OTX2	14	57265622	57284411	5	2	1238808	4.0723	2.3274e-05
HSPA5	9	127996131	128004661	4	2	900999	4.0677	2.3736e-05
RP11-9B6.1	4	93217401	93226329	1	1	1258385	4.0661	2.39e-05
OGFRP1	22	42664749	42676540	1	1	1336217	4.0569	2.486e-05
ORC5	7	103765787	103849495	96	7	1182141	4.0536	2.5216e-05
RPS6KA4	11	64125619	64140687	15	3	1284191	4.0518	2.5414e-05
GPR137	11	64050810	64057972	2	1	1075439	4.0418	2.652e-05
HTR3B	11	113774517	113820801	6	5	1185731	4.0152	2.9692e-05
SLC4A8	12	51784100	51910547	31	7	1302928	4.0033	3.1239e-05
U91319.1	16	13339088	13657869	92	22	1161688	4.0004	3.1616e-05
MAN2A1	5	109024627	109206326	112	12	1205794	3.9984	3.1881e-05
SERPING1	11	57364035	57387632	19	2	1298939	3.995	3.2354e-05
FURIN	15	91410817	91427794	1	1	1197945	3.9882	3.329e-05
PTPMT1	11	47585981	47596013	2	1	1330956	3.9858	3.362e-05
CTD-2009A10.1	16	73576831	73604208	4	2	1162013	3.978	3.4755e-05
PHF5A	22	41854720	41865696	2	1	1313866	3.9762	3.5011e-05
RP11-574K11.32	10	75528021	75533620	1	1	1293448	3.9725	3.556e-05
RP5-1024G6.2	1	53675127	53680447	3	1	1102718	3.9683	3.62e-05
PDE11A	2	178486971	178974066	118	16	1291388	3.9673	3.635e-05
LINC01415	18	53442957	53449952	1	1	1136833	3.9625	3.708e-05
IGF2BP3	7	23348827	23511110	48	9	1158312	3.9622	3.7125e-05
JTB	1	153945744	153951150	2	2	1257237	3.9621	3.714e-05
PRRC2B	9	134268439	134376584	30	6	1271413	3.9597	3.7526e-05
AKR1A1	1	46015214	46036721	1	1	1280622	3.9448	3.993e-05
ERLIN1	10	101908850	101946790	8	3	1319617	3.9411	4.0562e-05
CREB3L4	1	153939377	153947837	4	1	1304517	3.9407	4.063e-05
AL132709.1	14	101537314	101545247	2	2	1282441	3.9381	4.1059e-05
MINK1	17	4735634	4802356	4	3	1252889	3.9363	4.1365e-05
ZFHX4	8	77592481	77780517	61	8	1304800	3.9298	4.2508e-05
RNU5F-1	1	45186457	45188574	2	2	1108322	3.9235	4.364e-05
MAGOH	1	53691571	53705190	9	2	1172765	3.922	4.3911e-05
GNL2	1	38031416	38062538	34	4	1277679	3.9158	4.5047e-05
NPM1	5	170813119	170839814	27	2	1278545	3.9131	4.5552e-05
PRR7-AS1	5	176864503	176875983	5	1	996087	3.9118	4.5803e-05
PMFBP1	16	72145055	72207054	31	9	1274464	3.9115	4.5866e-05
TCF20	22	42555018	42681003	12	3	1287726	3.9108	4.6e-05
PXDNL	8	52231136	52723005	308	17	1209841	3.9091	4.6318e-05
ACTN2	1	236848798	236928931	54	13	1282484	3.9085	4.6435e-05
TOB2	22	41828497	41843805	2	1	1222496	3.9051	4.71e-05
ZSWIM8	10	75544363	75562555	5	2	1280922	3.9045	4.7204e-05
UQCRH	1	46768369	46783448	2	1	1336048	3.9035	4.741e-05
ACP2	11	47259852	47271457	11	3	1303703	3.8973	4.8634e-05
AL109767.1	14	99728284	99732072	1	1	1302890	3.896	4.889e-05
COX7B2	4	46735843	46912262	65	12	1257835	3.8944	4.9213e-05
KIFC1	6	33358599	33378673	11	6	1301016	3.8939	4.9332e-05
RP11-750H9.5	11	47402165	47431741	15	4	1317472	3.8912	4.9874e-05
SLC17A8	12	100749851	100816833	22	4	1133051	3.8893	5.0258e-05
DBN1	5	176882608	176901742	9	1	1077436	3.8824	5.1719e-05
RN7SKP230	5	109034200	109036535	5	2	1142223	3.8805	5.2112e-05
ZSCAN4	19	58179302	58191520	9	1	1325838	3.8788	5.249e-05
LOX	5	121397889	121414954	8	2	1314561	3.8745	5.3431e-05
MIR4688	11	46396951	46399034	2	1	1292111	3.873	5.3748e-05
CTB-78F1.2	5	167147367	167157129	5	2	1222645	3.8712	5.4151e-05
ZSCAN16	6	28074466	28098860	25	3	1316347	3.87	5.4424e-05
NDST2	10	75560668	75572356	4	2	1285740	3.864	5.5766e-05
AC002401.1	17	48211950	48224541	3	2	1298473	3.8592	5.6868e-05
SPI1	11	47375410	47401098	14	5	1304061	3.8581	5.7144e-05
MTRNR2L6	7	142373103	142376550	2	1	1188571	3.851	5.881e-05
RP11-164P12.3	4	152594634	152600045	4	1	1268195	3.8505	5.893e-05
ELOVL7	5	60046617	60141101	49	7	1306012	3.8437	6.059e-05
C2orf16	2	27759252	27806589	24	3	1134776	3.8433	6.0688e-05
GHR	5	42422540	42722980	210	17	1242525	3.8412	6.1225e-05
LRFN5	14	42075078	42374752	244	18	1231304	3.8411	6.124e-05
RP11-422P24.12	1	153935836	153938546	3	2	1226174	3.8362	6.2471e-05
SLC17A3	6	25844083	25883514	14	8	1298145	3.8304	6.3958e-05
NR1H4	12	100866485	100959192	3	3	1246330	3.8269	6.4889e-05
HFE	6	26086508	26099571	6	3	1248564	3.8264	6.5011e-05
ACO2	22	41842833	41926277	9	3	1140164	3.8242	6.5608e-05
RP11-321M21.4	18	73098010	73100551	10	2	1328036	3.8186	6.7098e-05
CHERP	19	16627704	16654248	2	2	1230977	3.8172	6.7499e-05
PTCH2	1	45284515	45309925	2	2	1212184	3.8161	6.7799e-05
PRR7	5	176872814	176884287	6	1	1007077	3.8047	7.0999e-05
NOP14-AS1	4	2935608	2964465	16	3	1331257	3.8044	7.1069e-05
NOP14	4	2938662	2966133	16	3	1331257	3.8044	7.1069e-05
TMEM192	4	165990759	166130701	200	15	1286043	3.803	7.147e-05
ZNF512	2	27804835	27847084	28	4	1316803	3.7988	7.2712e-05
PGBD1	6	28248348	28271326	6	4	1282821	3.7914	7.4908e-05
ERI3	1	44685741	44821929	16	6	1110161	3.7911	7.4988e-05
B3GALT4	6	33243899	33247602	1	1	1348610	3.7869	7.628e-05
RNU6-444P	6	88197162	88199270	2	1	1327549	3.7825	7.764e-05
SLC4A10	2	162479844	162842792	268	10	1284670	3.7795	7.8576e-05
TNFRSF21	6	47198267	47278641	25	7	993968	3.7788	7.879e-05
RP11-315E17.1	12	81770820	81951416	27	8	1225984	3.7779	7.9066e-05
MYOZ2	4	120055986	120109944	22	3	1313108	3.7704	8.1487e-05
NDUFS3	11	47599580	47607114	2	2	1335400	3.7701	8.1578e-05
HAPLN4	19	19364564	19374613	1	1	1244412	3.7695	8.18e-05
CCDC17	1	46084715	46090726	10	2	1287196	3.7685	8.2128e-05
DGKZ	11	46353454	46403104	24	8	1252049	3.7685	8.2131e-05
LRRC41	1	46742133	46770288	2	1	1311942	3.763	8.3957e-05
RP11-11C20.3	8	52721669	52724241	3	2	1236530	3.7628	8.401e-05
SLC4A1AP	2	27885292	27919233	6	2	1311698	3.7546	8.6822e-05
SLC39A1	1	153930574	153941660	6	3	1272351	3.7528	8.7428e-05
TRMT61A	14	103994532	104004410	5	1	942147	3.7522	8.765e-05
SCFD1	14	31090509	31207900	35	4	1296573	3.7483	8.901e-05
ZSWIM5	1	45481070	45673277	16	5	1312790	3.7472	8.9404e-05
BLOC1S2	10	102032036	102047437	2	1	1006596	3.7458	8.9904e-05
SORCS3	10	106400047	107026000	222	30	1169551	3.7439	9.0604e-05
GATAD2B	1	153776200	153896448	29	7	1271243	3.739	9.2375e-05
FUCA2	6	143814948	143833857	11	3	1304401	3.7372	9.3056e-05
NASP	1	46048659	46085576	25	2	1296131	3.7371	9.3073e-05
MFSD1	3	158518714	158548508	4	2	998678	3.7366	9.3267e-05
RPS18	6	33238851	33245288	5	2	1338134	3.7344	9.4074e-05
CEBPG	19	33863614	33874592	1	1	1308438	3.7333	9.451e-05
ADH5	4	99991128	100010939	20	5	1124662	3.7332	9.4544e-05
SEC24C	10	75503129	75532919	10	4	1277166	3.7331	9.4569e-05
EHBP1	2	62899985	63274622	65	13	1071371	3.7261	9.7224e-05
ZSCAN31	6	28291513	28325048	13	5	1300121	3.7161	0.00010117
RP1-313I6.12	6	28045569	28049908	4	1	1361233	3.7098	0.0001037
SUGP1	19	19385841	19432318	8	3	1292877	3.7068	0.00010495
RGS17	6	153324593	153453417	46	13	1274578	3.7065	0.00010508
RNU6-476P	22	42074714	42076821	3	1	1173931	3.7036	0.0001063
GRK6	5	176852676	176870902	4	2	1034441	3.7028	0.00010662
DGKH	13	42613171	42818032	34	14	1211259	3.7015	0.00010716
PPFIA2	12	81650753	82154129	165	25	1266531	3.6974	0.00010889
FABP3	1	31837099	31846923	7	3	1274476	3.696	0.00010952
FUT11	10	75531033	75536977	1	1	1335859	3.6946	0.0001101
LINC01460	2	27927652	27940587	4	1	1259969	3.6942	0.0001103
RP4-694B14.8	20	25660416	25662882	1	1	1308219	3.6887	0.0001127
RARS2	6	88222480	88300746	34	5	1290661	3.6885	0.00011278
ZKSCAN8	6	28108660	28128238	16	1	1354012	3.6874	0.0001133
WDPCP	2	63345693	63816652	374	20	1106400	3.6857	0.00011404
DENND4B	1	153900976	153920194	15	3	1266529	3.685	0.00011437
NEBL	10	21067901	21464116	114	18	1180969	3.6821	0.00011567
CELF1	11	47486484	47575684	13	4	1305988	3.6817	0.00011584
RP1-265C24.8	6	28103626	28108456	11	1	1369786	3.6765	0.00011821
PAIP1	5	43525368	43558797	26	2	1304559	3.6758	0.00011855
COL17A1	10	105790043	105846638	2	2	1317575	3.6745	0.00011914
RAD54L	1	46712366	46745152	2	2	1320612	3.6722	0.00012024
PLOD3	7	100848264	100861862	4	1	956380	3.6705	0.00012106
MEAF6	1	37954593	37981367	23	6	1110614	3.6698	0.00012137
AP1M2	19	10682346	10698991	44	7	1273409	3.6638	0.00012424
MPHOSPH6	16	82180766	82204829	1	1	1138272	3.6508	0.0001307
KMT2E-AS1	7	104652727	104655768	1	1	981193	3.6495	0.0001314
MTCH2	11	47637868	47665111	4	3	1310714	3.6491	0.00013159
CSMD3	8	113234156	114450168	487	28	1139675	3.6482	0.00013203
RP11-752G15.10	15	83406137	83408874	3	1	1334303	3.6461	0.0001331
TBC1D2	9	100960292	101018931	69	8	1225227	3.6448	0.00013381
CLN6	15	68498329	68550444	2	2	1147296	3.642	0.00013528
RP11-574K11.8	10	75600590	75607873	2	2	1311951	3.6418	0.00013537
LUZP2	11	24517598	25105184	439	26	1274558	3.6397	0.00013647
RP11-304L19.4	16	2161335	2164343	3	1	1303712	3.6395	0.0001366
INPP4B	4	142943312	143768454	160	25	1273041	3.6379	0.00013746
PPP1R9B	17	48210100	48229038	6	4	1267623	3.6365	0.00013817
PEPD	19	33876855	34013729	117	13	1129693	3.6351	0.00013892
C19orf44	19	16606204	16633163	1	1	1168678	3.6339	0.0001396
TNRC6B	22	40439820	40732812	109	7	1072374	3.6334	0.00013984
SMYD2	1	214453501	214511474	45	6	1248199	3.6332	0.00013994
RP11-374P20.4	9	136918411	136924927	3	1	1329020	3.6316	0.00014083
RP11-382A20.4	15	83846933	84109197	101	14	1262699	3.6309	0.0001412
USP3	15	63795709	63887839	36	7	1266621	3.6292	0.00014216
FAAH	1	46858988	46880517	6	2	1267235	3.6271	0.00014332
FBXL17	5	107193735	107718799	248	23	1280991	3.6258	0.00014406
PRDX5	11	64084592	64090283	2	1	1278680	3.6234	0.0001454
MED26	19	16684729	16740015	1	1	1314119	3.6148	0.0001503
CTD-3222D19.9	19	16696715	16701220	1	1	1314119	3.6148	0.0001503
OTX2-AS1	14	57278900	57398551	63	10	1268248	3.613	0.00015131
BIRC6	2	32581090	32845638	40	9	1157776	3.6119	0.00015199
ILF3	19	10764021	10804076	29	6	1309474	3.6119	0.00015199
RNF114	20	48551933	48571422	6	3	1310118	3.6118	0.00015205
PKP4	2	159312463	159540391	225	15	1249556	3.6094	0.00015346
CPT2	1	53661463	53680869	10	3	1113419	3.6085	0.00015398
DPP6	7	153444217	154686995	156	53	1232545	3.6083	0.00015408
FAM32A	19	16295190	16303857	2	1	1242529	3.608	0.0001543
HIPK3	11	33277217	33379569	38	3	1310958	3.6042	0.00015657
CWF19L1	10	101991054	102028395	6	1	945901	3.6036	0.0001569
CTC-436P18.4	5	60409258	60413580	4	3	1339133	3.6015	0.00015818
RAB26	16	2197144	2205166	2	2	1145336	3.5994	0.0001595
CCDC148	2	159026584	159314265	220	24	1166836	3.5986	0.00016
CRB1	1	197236333	197448585	57	11	1066189	3.595	0.00016217
TRIM38	6	25962029	25992459	4	4	1307423	3.5904	0.00016512
ABI2	2	204192002	204313451	13	6	1308380	3.5861	0.00016781
MAU2	19	19430637	19470563	15	6	1255017	3.5857	0.00016811
PPP1CC	12	111156484	111181744	3	2	1000082	3.5841	0.00016911
TANK	2	161992418	162093741	18	8	1158884	3.5823	0.00017032
MOGAT3	7	100837287	100845317	5	1	1216611	3.5822	0.00017038
DNM3	1	171786026	172388606	94	20	1203668	3.5799	0.00017186
CALML4	15	68482042	68499387	3	2	1197490	3.5785	0.00017278
ERCC8	5	60161280	60241900	64	6	1314387	3.5749	0.00017516
IPP	1	46163382	46217325	5	3	1131592	3.5748	0.00017527
AP000997.3	11	115528885	115533135	2	2	1144726	3.5719	0.00017719
MAPT	17	43970892	44106700	4	3	1263091	3.5694	0.00017893
VEGFB	11	64001055	64007736	2	1	1363701	3.5688	0.0001793
GGACT	13	101181417	101242043	4	3	1247267	3.5685	0.00017951
RP11-151A6.4	13	101186994	101233366	4	3	1247267	3.5685	0.00017951
ITGA1	5	52082749	52256039	69	11	1234720	3.5636	0.00018288
NGDN	14	23937887	23980071	15	4	1278008	3.5633	0.00018312
GPBP1L1	1	46091975	46153208	12	2	1259806	3.5602	0.00018527
CYP20A1	2	204102704	204171749	11	7	1248065	3.5572	0.00018742
AGBL2	11	47680142	47737921	15	5	1229612	3.5571	0.00018746
AKT3	1	243650534	244015381	67	7	1292554	3.5568	0.00018769
NDUFAF2	5	60240031	60449853	175	12	1294441	3.5552	0.00018885
SERINC2	1	31881411	31908527	37	3	1238225	3.5524	0.00019086
TENM2	5	166405033	167692162	274	58	1169261	3.5485	0.00019371
KPNA2	17	66030751	66043970	18	2	1292648	3.5481	0.00019398
SPATA20	17	48623449	48634213	5	3	1255871	3.5473	0.00019462
RASAL2-AS1	1	178058811	178063790	2	1	1342515	3.545	0.00019627
USP3-AS1	15	63835445	63893994	20	4	1288813	3.5448	0.00019648
RP11-707P17.1	15	51705293	51792030	3	2	1324791	3.5405	0.00019971
HYI-AS1	1	43918597	43923666	3	2	1173446	3.5405	0.00019972
PTGER3	1	71317035	71514499	21	11	1180243	3.5399	0.00020014
TTC1	5	159435119	159493550	31	7	1172947	3.5343	0.00020443
MEG9	14	101508244	101540274	23	8	1235646	3.5309	0.00020706
TRBV25-1	7	142377571	142380076	4	1	1363263	3.5279	0.0002094
TRIT1	1	40302781	40350178	4	3	1226682	3.5278	0.00020955
CTD-2008L17.1	18	53559268	53694313	23	7	1198331	3.5255	0.00021134
ZDBF2	2	207138386	207180151	8	4	1029171	3.5247	0.00021201
GLUD1P3	10	75489319	75498545	10	1	1145274	3.5211	0.00021485
RP13-401N8.1	20	25676638	25734401	6	3	1244690	3.5207	0.00021524
RP5-1102E8.3	1	77101561	77104024	7	2	1297231	3.5153	0.00021965
CCDC88B	11	64106675	64126006	18	5	1251579	3.515	0.0002199
ANXA5	4	122588100	122619135	11	3	1330902	3.5136	0.00022107
ZNHIT1	7	100860445	100868471	7	3	996654	3.5134	0.00022123
SERPINA1	14	94842083	94858030	2	2	1196332	3.5129	0.00022159
MDK	11	46401305	46406387	1	1	1335835	3.5126	0.0002219
XXbac-BPG157A10.21	6	33212851	33215633	4	4	1332780	3.5123	0.0002221
RP11-10O22.1	3	162743183	162950937	90	8	1293782	3.5096	0.00022438
SATB1-AS1	3	18485515	18965772	79	11	1201961	3.5088	0.00022509
ZNF337	20	25652830	25678489	2	2	1321534	3.5084	0.00022539
NR1H3	11	47268850	47291584	14	4	1295626	3.507	0.00022662
XXbac-BPG308K3.5	6	28804016	28807835	4	1	1301129	3.5068	0.00022678
ZSWIM8-AS1	10	75555271	75562157	2	1	1253328	3.5057	0.00022772
LINC01965	2	104489693	104718995	63	20	1209193	3.5044	0.00022882
SLC35A1	6	88181642	88223054	34	4	1303746	3.5037	0.00022939
CCDC121	2	27847504	27852879	6	2	1283995	3.5012	0.00023157
BNC1	15	83923635	83954416	17	3	1264459	3.5007	0.000232
NRBF2	10	64892006	64915791	4	3	1123283	3.5003	0.00023236
DYNC2LI1	2	44000177	44038149	5	3	1321682	3.5002	0.00023242
PLXNB2	22	50712407	50747075	2	2	1158409	3.4996	0.00023299
LGALS13	19	40092163	40099114	1	1	1362171	3.4993	0.0002332
RP11-752G15.8	15	83411974	83420041	2	1	1277769	3.4958	0.0002363
ATXN1	6	16298342	16762691	126	35	1241296	3.4951	0.00023692
SPIDR	8	48172469	48649868	9	4	1201940	3.4948	0.00023721
FOLH1	11	49165643	49231188	26	4	1090562	3.4943	0.00023761
PWWP2A	5	159501888	159547457	15	3	940714	3.4907	0.00024088
NIFK-AS1	2	122405895	122487135	59	5	1152401	3.4895	0.00024198
MARK3	14	103850713	103971168	57	5	1227153	3.4865	0.00024466
RP11-148O21.6	8	11408996	11423203	31	4	1276289	3.4797	0.00025098
SUPT7L	2	27872675	27887707	6	1	1309064	3.4719	0.00025839
RP11-269F20.1	1	243707833	243712631	1	1	1357376	3.4698	0.0002604
VPS52	6	33217048	33240653	16	4	1336527	3.4674	0.00026279
LINC01979	17	77888050	77901524	2	2	1260498	3.4662	0.00026398
APBB2	4	40811043	41217635	120	23	1214636	3.466	0.00026413
AL022393.9	6	28137622	28141299	2	2	1350381	3.4659	0.00026418
APBB1IP	10	26726269	26857732	14	9	1159961	3.4641	0.00026597
ADH4	4	100043807	100066448	100	5	1289962	3.4636	0.00026652
ZIC4	3	147102832	147125577	14	6	1242645	3.4628	0.00026727
RP11-90J7.4	10	80111353	80116857	4	2	1287298	3.4603	0.00026982
SMIM15	5	60452530	60459295	4	2	1297344	3.459	0.00027112
SRRM3	7	75830213	75917604	45	6	1267181	3.4519	0.00027833
TESK2	1	45808554	45957835	18	5	1290183	3.4489	0.0002814
ASAP1	8	131063349	131456920	251	20	1189920	3.4486	0.00028172
ATG13	11	46638090	46697368	20	4	1278512	3.4477	0.00028269
ZSCAN16-AS1	6	27981899	28106071	110	10	1280939	3.4477	0.00028271
PPTC7	12	110970049	111022123	4	4	1075032	3.4446	0.00028593
TAC1	7	97360395	97370784	2	2	1346940	3.4421	0.00028858
SLC32A1	20	37352128	37359015	3	1	1284497	3.44	0.00029086
USP14	18	157382	215629	20	1	1295299	3.4364	0.00029471
SNHG21	15	83418323	83426958	3	3	1309608	3.4362	0.00029502
DOK2	8	21765383	21772201	2	1	1307452	3.4353	0.00029591
RP1-153G14.4	6	27370788	27375743	2	2	1351279	3.4342	0.00029718
CPEB1	15	83210950	83317728	48	12	1304468	3.4326	0.0002989
HCG25	6	33216310	33223944	7	4	1331620	3.4272	0.00030491
C17orf58	17	65986214	65993585	2	1	1303737	3.4257	0.00030663
CAMK2G	10	75571258	75635349	21	4	1296738	3.421	0.00031196
RP11-159F24.3	5	43483014	43510458	17	2	1227194	3.4198	0.00031332
OMG	17	29620664	29625257	1	1	1258429	3.4193	0.0003139
GABBR2	9	101049390	101472217	89	22	1123182	3.4141	0.00031998
SNRNP40	1	31731414	31770635	40	4	1276611	3.4134	0.0003208
CTTNBP2	7	117349704	117514495	38	14	1202473	3.4134	0.00032081
CCDC152	5	42755919	42803541	30	4	1245761	3.4125	0.00032182
LINC01378	4	118348517	118613343	143	23	1235950	3.4101	0.00032473
ZNF382	19	37094718	37126016	2	2	1023586	3.4067	0.00032877
PCDH9	13	66875965	67805577	161	27	1212433	3.4043	0.0003317
RIMBP2	12	130879677	131253773	110	26	1221108	3.4035	0.00033262
SBF1	22	50881739	50914500	1	1	1258126	3.3999	0.000337
ZCCHC17	1	31768828	31838800	71	4	1255360	3.3977	0.00033972
AC007193.10	19	46822453	46844261	2	2	1332947	3.3963	0.00034157
VPS16	20	2820348	2848378	9	4	1216598	3.3953	0.00034279
JMJD1C	10	64925984	65226737	246	11	1300114	3.395	0.00034309
LRRN2	1	204585297	204655866	51	11	1303575	3.3926	0.00034615
LINC01004	7	104589761	104654500	11	6	1072676	3.3916	0.00034748
RP11-375N15.2	8	9411653	9415030	8	2	1246680	3.3908	0.00034847
ZNF236	18	74533512	74685857	63	9	1214107	3.3907	0.00034852
GATB	4	152590655	152683159	43	4	1293191	3.3892	0.00035054
ZIC1	3	147126151	147135506	2	2	1275529	3.3843	0.00035677
RP11-436F23.1	4	46391271	46513211	28	7	1221404	3.383	0.00035851
YTHDF3	8	64080111	64126344	1	1	1379033	3.3818	0.0003601
ATG10	5	81266841	81552952	85	16	1175979	3.3808	0.0003614
GPN1	2	27850113	27875378	18	3	1292125	3.3783	0.00036466
CIZ1	9	130922529	130967662	29	4	1156023	3.378	0.00036507
RP11-495K9.10	12	132103722	132106310	6	2	1278540	3.3775	0.0003658
TMOD2	15	52042793	52109560	2	2	1307441	3.3772	0.00036617
SLC44A2	19	10712185	10756233	58	8	1275968	3.3761	0.00036763
RP11-118E18.1	17	55608129	55610716	2	1	1297640	3.3754	0.0003685
CYTH1	17	76669129	76779379	5	2	1113065	3.3731	0.00037169
CTD-2540B15.9	19	33794941	33801293	7	2	1278815	3.3716	0.0003737
ZNF337-AS1	20	25603680	25670668	9	4	1191379	3.3712	0.00037415
RP11-151A6.6	13	101188618	101192821	2	2	1269616	3.3679	0.00037876
UBQLN4	1	156004089	156024589	2	1	1335727	3.3674	0.00037937
SLC35G6	17	7383764	7387815	5	1	1328189	3.3672	0.00037967
GPAT2	2	96686693	96702722	2	1	1281274	3.3666	0.0003805
BAD	11	64036301	64053137	4	3	1255137	3.3663	0.00038089
WDR46	6	33245884	33258016	10	3	1299987	3.3659	0.0003815
SPN	16	29673299	29683197	1	1	1343188	3.3654	0.0003822
RP11-667M19.2	11	113640114	113643413	1	1	961483	3.3629	0.0003856
ADGRL3	4	62065043	62945053	156	39	1253610	3.3627	0.00038585
FNBP4	11	47737045	47789893	39	6	1239954	3.3605	0.00038903
GABRA2	4	46244564	46478247	22	10	1167547	3.3605	0.00038907
ZNF202	11	123593621	123613379	2	2	1161510	3.3604	0.00038916
LCN2	9	130910349	130916732	2	1	1235690	3.3572	0.0003937
SALL1	16	51168892	51187245	11	4	1295184	3.3542	0.00039803
HOXB4	17	46651868	46656712	3	2	1366235	3.3539	0.00039841
TRPS1	8	116419723	116682202	110	12	1288394	3.3525	0.00040044
EVI2B	17	29629787	29642123	3	1	1214133	3.3499	0.00040424
CLDN15	7	100874372	100883101	2	2	948594	3.3489	0.00040563
LRP8	1	53707035	53795141	31	5	1112137	3.3489	0.00040564
SLC22A8	11	62759295	62784313	3	2	1159191	3.3471	0.00040826
ZNF76	6	35226511	35264762	2	2	1343266	3.3467	0.0004089
GABRG1	4	46036785	46127071	5	2	1325206	3.3454	0.0004108
BRINP1	9	121927906	122132713	103	16	1271116	3.3447	0.00041192
ITFG2	12	2920833	2935242	2	2	974501	3.3436	0.00041346
TRAPPC1	17	7832662	7836317	1	1	1322064	3.3423	0.0004154
CNTROB	17	7834472	7854238	1	1	1322064	3.3423	0.0004154
GATAD2A	19	19495641	19620741	41	5	1294839	3.3413	0.00041694
ZNF165	6	28047345	28058341	10	3	1343976	3.3412	0.00041705
MSRA	8	9910801	10287401	169	29	1234173	3.3343	0.00042753
CTD-2008L17.2	18	53669843	53859493	97	12	1171045	3.334	0.00042803
RP11-731D1.4	4	152253926	152275376	7	3	1304722	3.3308	0.00043297
NOLC1	10	103910932	103924628	1	1	1327281	3.3306	0.0004333
LINC02145	5	6309553	6338405	1	1	1340664	3.3305	0.0004335
RP11-337N6.1	2	178170100	178176300	3	3	1317780	3.3286	0.00043638
ZFHX4-AS1	8	77402434	77596739	48	11	1286633	3.3272	0.0004386
ZC3H7B	22	41696528	41757151	5	4	1132232	3.327	0.00043887
RP11-266K22.2	1	31804913	31820646	15	2	1197638	3.3269	0.00043916
RP11-1072C15.4	17	42750056	42754625	1	1	1280571	3.3268	0.0004393
NF1	17	29420944	29705705	156	3	1174236	3.3258	0.00044081
ROBO2	3	75954845	77700115	458	50	1185692	3.3236	0.0004443
CNTN5	11	98890678	100230616	433	53	1167445	3.3223	0.00044635
FRAT1	10	99078027	99082672	4	1	1311889	3.3207	0.00044896
BTBD1	15	83684174	83737004	38	9	1228535	3.3203	0.00044967
BIRC6-AS2	2	32781339	32784950	1	1	993200	3.3194	0.0004511
SNU13	22	42068936	42087508	24	4	1188904	3.3171	0.00045477
PNPO	17	46017932	46027674	4	2	1331350	3.3156	0.00045722
ENTPD6	20	25175328	25209711	2	2	1341555	3.314	0.00045992
MAST2	1	46268283	46502794	199	5	1291511	3.3103	0.00046599
SCN2A	2	166094923	166249820	34	6	1236686	3.3094	0.00046742
REEP3	10	65280160	65385888	31	7	1209690	3.3087	0.0004686
ADAT2	6	143742968	143772832	49	2	1269955	3.3083	0.0004693
RP11-457M11.7	6	26601960	26607889	1	1	1306401	3.3065	0.0004724
RASGRP4	19	38898694	38917945	3	2	1327537	3.3048	0.00047524
BAIAP3	16	1382643	1400442	1	1	1326609	3.3043	0.0004761
NOL4L	20	31029861	31174135	65	7	1194539	3.3037	0.00047701
RP11-73M7.1	1	32036185	32044499	2	2	1324105	3.2993	0.00048456
RP11-35O15.2	15	99202438	99204897	4	2	1271364	3.2965	0.00048951
ZBTB3	11	62517434	62522656	2	1	1331344	3.2937	0.0004944
NEK11	3	130744693	131070309	76	8	1078367	3.2923	0.00049677
IRF2BP2	1	234739014	234746924	1	1	1316659	3.2896	0.0005017
RP11-789C17.1	18	8401844	8406159	1	1	1340453	3.2892	0.0005024
RPLP0	12	120633501	120640014	2	1	1292686	3.2862	0.0005077
VDAC2	10	76968911	76992206	2	2	1191111	3.2858	0.00050841
DNAH14	1	225082963	225587988	33	12	1175397	3.285	0.00050996
ESR1	6	152010630	152451754	126	20	1197042	3.2829	0.00051367
PXN-AS1	12	120638127	120652013	3	1	1302904	3.2811	0.000517
POSTN	13	38135719	38173981	32	5	1092539	3.2795	0.00051993
HARBI1	11	46623410	46639777	7	3	1284957	3.2763	0.00052593
RP4-778K6.3	7	104943723	104948089	2	2	1335262	3.2757	0.00052695
MEIOC	17	42732835	42754169	4	2	1309627	3.2739	0.00053044
RP11-430C7.4	1	204571162	204586693	14	3	1296337	3.2721	0.00053367
CSDC2	22	41956013	41973670	11	2	1301388	3.2714	0.00053502
RP11-379H8.1	15	83208619	83232124	14	7	1306195	3.2712	0.0005355
NIFK	2	122483520	122495451	11	2	1098587	3.2702	0.00053735
PENK	8	57352512	57360222	8	2	960064	3.2699	0.00053798
ATP13A1	19	19755006	19775485	4	1	1336361	3.2698	0.00053816
CHUK	10	101947056	101990353	14	2	1213488	3.2693	0.00053904
C5orf34	5	43485810	43516250	20	2	1245277	3.2636	0.00055004
PKD1	16	2137708	2186899	6	3	1196517	3.2624	0.00055229
CD300LG	17	41923515	41942007	2	1	1334461	3.2613	0.0005546
FGF21	19	49257780	49262590	1	1	1125494	3.2611	0.000555
DNAJC3	13	96328392	96448242	41	9	1276790	3.2597	0.0005577
DENND1B	1	197472877	197745610	131	9	1213821	3.2564	0.00056408
RP1-278C19.8	12	120661546	120664224	1	1	1293648	3.2559	0.0005652
TRMT12	8	125462060	125466267	4	4	1279098	3.2527	0.00057147
RP11-382A20.7	15	83680412	83731597	33	8	1227532	3.252	0.00057291
RP11-696N14.1	4	100008989	100223513	205	10	1288298	3.2518	0.00057332
RP11-703H8.7	11	62103382	62106562	4	2	1110201	3.2517	0.00057351
SLC27A3	1	153745829	153753633	2	1	1318984	3.2511	0.00057485
ITGB6	2	160955177	161057824	68	6	1183914	3.2484	0.00058031
CSNK1G3	5	122846870	122953743	5	3	1058882	3.2479	0.00058122
GINS4	8	41385739	41403549	3	1	1014696	3.2476	0.0005819
C10orf55	10	75668726	75683535	13	3	1219977	3.2469	0.00058327
AP1M1	19	16307664	16357717	24	5	1275069	3.2461	0.00058499
BCL11B	14	99634623	99739534	23	11	1222250	3.2454	0.00058638
FERMT3	11	63972397	63992368	5	1	1296325	3.2411	0.00059533
SLC30A1	1	211743909	211753503	6	3	1304408	3.2409	0.00059585
ST3GAL6-AS1	3	98424118	98452514	19	3	1287366	3.2404	0.00059679
FRAT2	10	99091253	99095486	3	2	1255964	3.2393	0.00059911
ELOB	16	2820414	2828290	6	2	1254824	3.2373	0.00060326
DDIT4	10	74032677	74036794	2	1	1200506	3.2373	0.00060332
POLR2A	17	7386684	7418496	49	2	1314391	3.2367	0.00060454
ELAVL2	9	23689101	23827335	26	9	1255469	3.2355	0.00060714
NRIP2	12	2933513	2945201	5	3	1037244	3.2349	0.00060835
CUEDC2	10	104182005	104193331	5	1	1273206	3.2335	0.00061133
ST6GALNAC3	1	76539430	77101288	74	19	1270990	3.2333	0.00061187
MADD	11	47289926	47352582	41	6	1300949	3.2311	0.00061652
RP11-384J4.2	14	27067960	27765722	60	19	1069338	3.2306	0.0006177
METAP1	4	99915871	99984960	24	4	1096955	3.2287	0.00062183
ASNS	7	97479988	97502854	5	1	1313519	3.227	0.00062543
RP1-67K17.4	6	143108259	143116223	2	1	1345766	3.2267	0.0006261
NPVF	7	25263188	25269105	2	1	1121850	3.2249	0.0006301
BEND4	4	42111869	42155895	34	5	1289416	3.224	0.00063212
PAICS	4	57300906	57331744	6	2	1233640	3.2238	0.00063246
KCNE1	21	35817985	35885508	1	1	1079750	3.2237	0.0006328
SNIP1	1	37999049	38020894	17	5	1273630	3.223	0.00063436
DNAJC13	3	132135345	132258876	42	8	1180221	3.222	0.00063642
PBX1	1	164527420	164855960	34	18	1160684	3.2211	0.00063843
RP4-533D7.4	1	46511489	46515040	3	2	1323694	3.2205	0.00063976
SRRM2-AS1	16	2786076	2803601	1	1	1370045	3.2177	0.0006462
TIE1	1	43765652	43789779	10	1	962566	3.2169	0.00064788
CTA-992D9.6	22	27443105	27458209	1	1	1294607	3.2164	0.0006491
DNAJC5G	2	27497300	27505367	1	1	1358409	3.2139	0.0006548
RP11-142O6.1	17	29459199	29466536	8	2	1095522	3.2133	0.00065616
PLA2R1	2	160787516	160920126	92	17	1127386	3.2125	0.00065795
DPYD-AS1	1	97560478	97789511	82	16	1178149	3.2102	0.00066313
UBR2	6	42530766	42662243	28	5	1278228	3.2098	0.00066402
METTL14	4	119605546	119637585	3	2	1223357	3.2075	0.00066951
BMS1P4	10	75457908	75491245	18	3	1031142	3.2069	0.00067077
NAB2	12	57481876	57490259	2	1	1336625	3.2048	0.00067578
RP11-495K9.9	12	132105435	132108748	9	2	1257533	3.204	0.00067757
PLAU	10	75669861	75678254	5	2	1282488	3.2029	0.0006803
NAT8	2	73866849	73870549	1	1	1280304	3.2013	0.0006841
TMEM200C	18	5881070	5896954	2	2	1191737	3.2007	0.00068546
AGBL1	15	86622101	87573283	303	48	1199161	3.2004	0.00068617
RP11-430C7.5	1	204594902	204599840	6	2	1307279	3.1982	0.00069139
GMIP	19	19739284	19755466	1	1	1328870	3.1982	0.0006914
ANKRD36C	2	96501666	96658579	30	5	1205097	3.1959	0.000697
RP11-574K11.24	10	75501719	75505074	1	1	1080288	3.1953	0.0006984
WDR87	19	38374462	38398317	2	1	1326265	3.1938	0.00070206
RP11-159F24.5	5	43514375	43526412	13	2	1174115	3.1917	0.00070709
CPEB3	10	93805448	94051835	36	5	1172341	3.1916	0.00070749
PCMTD1	8	52729134	52812746	66	6	1289772	3.1904	0.00071049
RN7SL405P	17	42960353	42962639	1	1	1351749	3.1899	0.0007116
RP4-536B24.2	16	87869137	87872269	4	1	945099	3.1886	0.00071473
ZNF804A	2	185462255	185805219	72	16	1172293	3.1885	0.00071514
ESYT2	7	158522685	158623319	47	8	1284092	3.1866	0.00071972
DNALI1	1	38021519	38033458	15	3	1282918	3.1855	0.0007225
RP11-325K19.1	18	58295195	58570959	293	6	1225945	3.1848	0.00072434
THOC1	18	213519	269047	32	3	1266162	3.1846	0.00072486
RP11-159N11.4	11	113238199	113240839	1	1	1337453	3.1845	0.0007249
PIK3R3	1	46504811	46599708	52	2	1223220	3.1836	0.00072731
BRD3	9	136894426	136934657	33	6	1262960	3.1827	0.00072961
TPRKB	2	73955999	73965527	8	1	1264053	3.181	0.0007339
EED	11	85911253	85990855	12	5	1026408	3.1798	0.0007369
PRKCB	16	23846303	24232932	177	20	1270129	3.1795	0.00073769
KBTBD4	11	47592748	47601522	1	1	1143078	3.1784	0.0007405
DNAJC9-AS1	10	75006117	75037742	49	2	1340138	3.1783	0.00074081
CAMK2B	7	44255748	44375176	18	5	1244400	3.1779	0.00074166
RP11-706P11.2	18	55254842	55257323	3	2	1314367	3.1775	0.00074276
PKNOX2	11	125033646	125304285	27	14	1227596	3.1748	0.00074966
AC009487.4	2	162278169	162281088	1	1	1294289	3.1743	0.000751
RP11-33A14.1	3	177880795	178104267	24	9	1312766	3.1742	0.00075128
ARHGAP1	11	46697629	46723169	5	2	1335113	3.1742	0.00075136
ZNF408	11	46721580	46728462	2	2	1320381	3.1727	0.00075513
TNKS	8	9412421	9640856	242	14	1282872	3.1723	0.00075623
AL133243.1	2	32745993	32749614	1	1	1357584	3.1702	0.0007618
XRCC6	22	42016166	42061052	9	5	1120092	3.1696	0.00076333
UGGT2	13	96452833	96706736	171	14	1191024	3.1695	0.00076357
PITX3	10	103988942	104002269	1	1	1356753	3.1694	0.0007639
NDUFV2	18	9101692	9135343	18	5	1303327	3.1693	0.00076396
WHAMM	15	83477379	83505860	26	7	1281913	3.1692	0.00076429
ST3GAL6	3	98450098	98515705	13	5	1295642	3.169	0.00076484
NEGR1	1	71860625	72749222	316	37	1224584	3.1676	0.00076852
GOLGA1	9	127639553	127704362	41	4	1225961	3.1671	0.00076988
DMXL1	5	118405781	118585822	32	10	1126914	3.1669	0.00077047
RPS13	11	17094934	17100214	1	1	1086078	3.1656	0.0007739
SNORD14A	11	17095200	17097291	1	1	1086078	3.1656	0.0007739
CNTNAP4	16	76310175	76595654	183	16	1218721	3.1642	0.00077766
WDTC1	1	27560122	27636127	1	1	1389571	3.1639	0.0007784
MN1	22	28143264	28198744	7	5	1236173	3.1632	0.00078013
CBLL1	7	107382517	107403112	1	1	1328197	3.163	0.0007808
PKD1L3	16	71962440	72035301	32	9	1314864	3.1629	0.00078101
SACM1L	3	45729732	45787904	27	7	1294322	3.1627	0.00078143
SPAG7	17	4861520	4872112	3	1	1317195	3.1616	0.0007846
THRSP	11	77773906	77780397	1	1	1372666	3.16	0.0007888
NUP210L	1	153964165	154128592	87	10	1290845	3.1599	0.00078902
TRIM54	2	27504296	27531307	2	1	1349541	3.158	0.00079423
CTD-2313J23.1	16	24483118	24507498	4	2	1292053	3.1575	0.00079555
LINGO2	9	27936614	29214599	406	40	1232459	3.1568	0.00079765
DUSP13	10	76853189	76869979	1	1	1356520	3.154	0.0008053
PTGS2	1	186639922	186651054	1	1	1345400	3.1537	0.0008062
GPR137C	14	53018553	53105431	2	2	1099437	3.1527	0.00080886
CTD-2014B16.3	14	66423014	66472241	6	3	1296014	3.1504	0.00081519
TMEM222	1	27647635	27663891	1	1	1389138	3.1504	0.0008153
RNU6-48P	1	27650709	27652816	1	1	1389138	3.1504	0.0008153
LINC01929	18	52772134	52792537	18	3	1052732	3.1498	0.00081691
RP11-118E18.4	17	55677216	55686773	2	2	1179043	3.1485	0.00082064
BRWD1-AS1	21	40686632	40696144	10	2	1260442	3.1485	0.00082064
HCG15	6	28952979	28956261	1	1	1293763	3.1473	0.0008239
HCG16	6	28953576	28957313	2	1	1293816	3.1473	0.0008239
BEND7	10	13479636	13572014	57	8	999164	3.1463	0.00082671
LINC00678	11	27638172	27657174	6	4	1130603	3.1457	0.00082831
CTD-2210P15.3	5	43585468	43588645	2	1	1267510	3.1436	0.0008343
LDB1	10	103865245	103881125	3	2	1330255	3.1433	0.00083513
FGFR3	4	1794019	1811599	3	3	1308526	3.1429	0.0008365
SHISA9	16	12994454	13335273	43	14	1229885	3.1411	0.0008417
PRKDC	8	48684671	48873738	5	3	1240969	3.1389	0.00084789
PTBP2	1	97186332	97290294	48	4	1309291	3.1387	0.00084837
SORL1	11	121322022	121505472	24	10	1082720	3.1384	0.00084942
RP11-464F9.22	10	75389313	75392248	1	1	1247984	3.1375	0.0008521
MYOZ1	10	75390369	75402232	1	1	1247984	3.1375	0.0008521
RP11-334E15.1	2	162289384	162294969	1	1	1071243	3.1351	0.0008589
MAML3	4	140636906	141076338	66	22	1246933	3.1347	0.00086009
ALMS1	2	73611885	73838043	190	8	1282439	3.1347	0.00086025
LINC00294	11	33096694	33102000	2	2	1176302	3.1328	0.00086572
RIOX1	14	73956637	73961098	3	3	1281467	3.1322	0.00086736
RP11-539L10.5	4	6698587	6701536	2	1	1263428	3.1322	0.0008676
ARPC5L	9	127623408	127641012	6	1	1319592	3.1306	0.00087227
NDUFV2-AS1	18	9120176	9137643	10	3	1298074	3.1299	0.00087442
LUC7L	16	237967	280462	18	5	1068432	3.1293	0.00087609
RP11-520D19.2	3	81295243	81347496	15	2	1148344	3.129	0.00087707
NWD2	4	37245364	37452085	48	15	1173419	3.1288	0.00087774
CELF4	18	34822002	35146790	52	22	1112509	3.1272	0.00088228
RP11-579E24.2	8	64614634	64658044	35	2	1227049	3.1261	0.00088577
ZNF254	19	24215206	24313770	1	1	1217810	3.124	0.000892
POLR3H	22	41920802	41941610	1	1	1107312	3.1236	0.0008932
PTCD1	7	99013361	99037421	5	2	923525	3.1235	0.00089361
SRGAP3	3	9021274	9292330	80	22	1259665	3.1228	0.00089583
AMBRA1	11	46416963	46616595	56	7	1283159	3.1214	0.00089991
YWHAQ	2	9723095	9772126	17	4	968865	3.121	0.00090119
GRM1	6	146347803	146759737	203	20	1262154	3.1186	0.00090864
TMEM214	2	27254832	27265562	2	1	1375722	3.1182	0.0009097
ZFHX3	16	72815783	73926770	156	57	1233930	3.1177	0.00091122
PMM1	22	41971903	41986844	7	1	1282468	3.1173	0.00091243
RNF133	7	122336788	122340171	1	1	1258664	3.1141	0.0009224
SLC43A1	11	57251006	57284175	1	1	1355299	3.1129	0.0009264
AP003774.1	11	64091521	64108626	6	2	1115907	3.11	0.00093533
RP11-84A19.4	1	32316513	32388442	5	5	1301403	3.1099	0.00093565
SORCS1	10	108332420	108925464	135	21	1229462	3.1091	0.00093825
RP11-382A20.6	15	83690322	83760534	53	12	1242693	3.1076	0.00094323
ZNF101	19	19778647	19795315	10	3	1324850	3.1051	0.00095093
YIPF4	2	32501972	32542663	7	5	1055545	3.1043	0.00095371
ALMS1P1	2	73867209	73925636	48	5	1285694	3.1033	0.00095682
MDGA2	14	47307831	48145808	135	32	1243557	3.1009	0.0009647
ZNF391	6	27355537	27372687	13	4	1311896	3.0939	0.00098773
SORBS1	10	97070527	97322171	76	21	1259391	3.0936	0.00098888
RIMS1	6	72595252	73113852	283	20	1184251	3.0922	0.00099344
EDIL3	5	83235372	83681698	142	16	1127271	3.0905	0.00099926
PEG3	19	57320444	57353096	10	2	1341655	3.0904	0.00099943
CMTM4	16	66647652	66731646	2	2	1254782	3.0884	0.0010062
COL16A1	1	32116863	32170920	4	4	1143214	3.088	0.0010074
PFN2	3	149681690	149769575	20	7	1269681	3.0822	0.0010273
CTD-2002H8.2	14	58730379	58737399	2	2	969837	3.0813	0.0010305
GCN1	12	120564005	120633518	39	2	1325529	3.0811	0.0010313
STX1A	7	73112535	73134999	2	1	1130530	3.0803	0.001034
BLK	8	11350895	11423108	95	16	1279920	3.0802	0.0010343
ROPN1L	5	10440635	10466138	1	1	1313599	3.08	0.001035
RWDD3	1	95698765	95713781	1	1	1230057	3.0794	0.001037
PAX3	2	223063605	223164717	39	5	1057104	3.079	0.0010386
ADGRL4	1	79354448	79748809	306	20	1108333	3.078	0.001042
RP11-36I17.2	16	53661167	53663728	3	1	1335126	3.0777	0.001043
DUSP11	2	73988339	74008248	7	1	1317686	3.0776	0.0010433
ETV6	12	11801607	12049311	13	8	1164354	3.0773	0.0010444
PKD2L2	5	137224125	137279436	1	1	1332590	3.0771	0.001045
TCF4	18	52888415	53304258	45	14	1272076	3.0771	0.001045
WWP2	16	69795234	69976644	139	15	1273171	3.0769	0.0010457
PKP4-AS1	2	159513848	159592514	91	12	1278148	3.0761	0.0010487
RP11-307B6.3	1	201866227	201870106	1	1	1280729	3.0757	0.00105
ARL9	4	57370374	57391619	2	2	1326299	3.0748	0.0010533
RP11-434P11.2	2	73976382	73978913	1	1	1325980	3.0737	0.001057
LINC01556	6	28910653	28913314	1	1	1293908	3.0737	0.001057
RP11-390K5.3	11	47143654	47153352	4	2	1325241	3.0715	0.0010648
ALOX12B	17	7974953	7992034	1	1	1325897	3.0712	0.001066
AC129492.6	17	7981799	7985883	1	1	1325897	3.0712	0.001066
CCDC134	22	42195682	42229168	27	5	1289626	3.0708	0.0010676
GPRIN1	5	176021802	176038157	1	1	1155358	3.0706	0.001068
CTD-2062F14.3	14	101004275	101007746	2	1	993293	3.0692	0.001073
ZBTB4	17	7361684	7388582	19	3	1294373	3.0692	0.0010731
FSD2	15	83423113	83475821	28	5	1317141	3.0689	0.0010744
RP5-1014D13.2	22	38271154	38292570	5	1	1318507	3.0687	0.0010748
LAMA1	18	6940740	7118796	46	16	1188420	3.0686	0.0010755
RYR3	15	33602162	34159303	100	31	1241435	3.0669	0.0010814
GINS1	20	25370643	25430708	64	5	1269622	3.0662	0.0010839
PEX3	6	143770941	143812753	14	3	1296653	3.0657	0.0010859
UHRF1	19	4902091	4963165	7	6	1180725	3.0655	0.0010866
HMGN1	21	40713240	40722573	18	4	1200290	3.0637	0.001093
AMMECR1L	2	128618203	128644535	3	2	1175158	3.0632	0.0010949
GBX2	2	237072878	237078029	2	1	972267	3.0621	0.001099
PEAR1	1	156862509	156887221	1	1	1295176	3.0602	0.001106
ADD1	4	2844570	2932803	52	6	1195252	3.0601	0.0011065
RP11-248M19.1	18	77659554	77661903	1	1	1128415	3.058	0.001114
LINC02128	16	50874261	50935974	12	6	1039709	3.0575	0.0011159
CACNA1G-AS1	17	48632567	48640469	7	5	1226702	3.0575	0.001116
ZNF367	9	99147222	99181652	17	2	1282577	3.0573	0.0011165
RP11-334J6.6	9	134390944	134398616	2	1	1341802	3.0561	0.001121
MAP2K2	19	4089318	4125119	23	5	1228337	3.0559	0.0011221
PDE5A	4	120414551	120550959	110	10	1292954	3.0544	0.0011274
ZNF311	6	28961564	28974092	1	1	1293882	3.0535	0.001131
AF131215.6	8	10919156	10925599	2	1	1189409	3.0519	0.001137
LRP1	12	57521265	57608144	11	5	1245190	3.0495	0.0011461
ASRGL1	11	62103919	62161884	21	4	961917	3.0494	0.0011465
INCA1	17	4890424	4901905	6	3	1061896	3.0476	0.0011534
ZNF512B	20	62587056	62602283	2	2	1132953	3.0469	0.0011562
FAM3B	21	42687727	42730654	11	4	1273265	3.0464	0.001158
ZNF461	19	37126519	37158743	4	3	1188175	3.0458	0.0011603
LINC00336	6	33552882	33562115	1	1	982248	3.0456	0.001161
SPINK8	3	48347331	48376151	1	1	1374925	3.0454	0.001162
CNTNAP5	2	124781863	125679796	368	42	1221093	3.0451	0.0011631
RP4-530I15.9	20	49186511	49195578	13	4	1140840	3.0444	0.0011658
TET2-AS1	4	106091510	106100220	5	3	1189697	3.0442	0.0011666
PIAS1	15	68345652	68487185	10	5	1107619	3.0427	0.0011723
MEI1	22	42094506	42196458	101	7	1284501	3.0421	0.0011745
ADCY1	7	45612738	45763715	34	11	1239230	3.0419	0.0011753
LINC01778	1	31296085	31308129	6	3	1115551	3.0415	0.0011768
TMEM26-AS1	10	63211396	63242714	5	3	1178949	3.0399	0.0011833
ENG	9	130576291	130617937	2	2	1211864	3.0395	0.0011849
OSBPL3	7	24835158	25020797	72	21	1197077	3.0393	0.0011858
ST8SIA2	15	92936110	93012958	6	3	1332937	3.0374	0.001193
RP11-173P15.7	12	121177272	121200426	12	5	1318273	3.0349	0.0012029
NRAP	10	115347472	115424829	8	5	1258198	3.0338	0.0012074
ENPP1	6	132128159	132217295	9	4	1263397	3.0329	0.0012111
YJEFN3	19	19638669	19649390	9	1	1278331	3.0313	0.0012176
MORC1	3	108676094	108837981	6	4	1245802	3.0299	0.0012231
DYNLL2	17	56159779	56173903	2	1	1321555	3.0275	0.001233
CAMTA2	17	4870291	4891970	2	2	1141249	3.0274	0.0012331
ASTL	2	96787556	96805241	9	2	1315903	3.027	0.0012349
DISC1	1	231761535	232178018	133	20	1207923	3.0268	0.001236
COL4A4	2	227866429	228029921	10	8	1239509	3.025	0.001243
LINC00924	15	95975323	96052076	5	1	1322381	3.025	0.0012431
TBR1	2	162271807	162283381	2	2	1325400	3.0246	0.0012447
MICAL3	22	18269414	18508327	15	8	1243064	3.0236	0.0012491
TRAF1	9	123663670	123692451	2	2	1123950	3.0229	0.001252
RP11-452K12.4	10	99093320	99103961	8	2	1157689	3.0215	0.0012576
NCOA7	6	126101306	126254180	34	7	1186811	3.0204	0.001262
NKAIN1	1	31651591	31713734	65	4	1227837	3.0203	0.0012626
CXCL9	4	76921427	76929662	1	1	1384615	3.02	0.001264
GTF3C2	2	27547715	27580631	2	2	1197226	3.0195	0.0012658
RP11-855A2.2	17	65969049	65973188	1	1	1348318	3.0185	0.00127
AC005618.6	5	140704824	140709927	2	1	1321597	3.0165	0.0012787
RN7SL272P	13	28562434	28564721	4	2	1167183	3.0158	0.0012815
UPF1	19	18941767	18980039	7	1	1322628	3.0156	0.0012823
BRWD1	21	40555101	40686745	119	7	1233603	3.0155	0.0012827
PSMC3	11	47439319	47449024	1	1	1247361	3.0152	0.001284
RAB11FIP4	17	29717692	29866230	6	5	1276590	3.0116	0.0012995
S100P	4	6694604	6699897	4	2	1339555	3.0108	0.0013026
TERF2IP	16	75680670	75796728	16	8	1254835	3.0098	0.0013069
AXIN1	16	336439	403723	32	7	1227423	3.009	0.0013105
RP11-684N3.1	11	132272253	132274954	7	4	1174097	3.0074	0.0013173
HOXB3	17	46625231	46668603	17	7	1316800	3.0069	0.0013196
SUN1	7	855251	915571	4	3	1235713	3.0053	0.0013264
MIR3663HG	10	118903074	118929619	3	1	1103146	3.0041	0.001332
HOXB-AS3	17	46625991	46684756	24	8	1292851	3.0039	0.0013328
C5orf52	5	157097540	157108166	6	3	1300044	3.0033	0.0013355
WIPF3	7	29845101	29957677	73	15	1195080	3.0027	0.0013379
ZIM2	19	57284914	57353097	14	2	1322398	3.0016	0.0013427
RP11-354E23.4	10	74515155	74517774	1	1	1306097	3.0016	0.001343
NFE2L2	2	178082394	178258484	17	6	1255883	3.001	0.0013454
AC074286.1	2	178134852	178258427	17	6	1255883	3.001	0.0013454
ARHGAP19	10	98980932	99053430	60	5	1282379	2.9997	0.0013512
ZNF573	19	38228202	38308940	4	1	1202668	2.9986	0.001356
PADI1	1	17530622	17573502	11	5	1247685	2.9984	0.001357
LEMD1-AS1	1	205341379	205357568	2	1	1338548	2.998	0.001359
PLEKHA4	19	49339348	49372874	24	3	1166629	2.9978	0.0013598
CDK14	7	90224634	90840905	222	25	1276896	2.9962	0.0013667
LINC00184	1	234764056	234771526	2	2	1167396	2.9958	0.0013686
OPRM1	6	154330635	154569001	74	14	1278045	2.9942	0.0013757
HAS3	16	69138555	69153622	3	2	1224089	2.9939	0.0013771
TMEM132C	12	128750714	129193456	69	17	1194183	2.9933	0.0013801
STAT6	12	57488190	57523883	2	2	1339068	2.9923	0.0013845
CFAP70	10	75012519	75119622	200	5	1317288	2.9914	0.0013883
RP11-855A2.1	17	65950429	65954407	1	1	1318801	2.9898	0.001396
SNX3	6	108531425	108583448	9	1	1285457	2.9889	0.0014
HOXB6	17	46672112	46683354	5	3	1275447	2.9882	0.0014033
TAF7	5	140697056	140701351	1	1	1289260	2.9867	0.00141
C5	9	123694264	123838473	4	2	1298743	2.9865	0.001411
RNF141	11	10532219	10563737	9	3	1031457	2.9852	0.0014169
AP002954.3	11	118506337	118509815	1	1	1364020	2.985	0.001418
AP1G1	16	71761902	71844104	58	9	1218919	2.9848	0.0014186
RP11-855A2.3	17	65946000	65948862	2	1	1318371	2.9838	0.0014234
STIP1	11	63951743	63973015	7	2	1315768	2.9832	0.0014263
AEBP2	12	19555999	19676173	42	5	1287878	2.983	0.001427
DPY19L4	8	95731127	95807064	11	4	1271806	2.9826	0.001429
LRRC37A11P	17	37185158	37210468	9	2	946596	2.9812	0.0014355
EPS15L1	19	16465057	16583896	14	8	1265268	2.9803	0.0014398
TM7SF3	12	27123511	27168317	16	6	1081796	2.9786	0.001448
RP11-354E23.3	10	74489314	74491933	2	1	1092570	2.9746	0.0014671
WDR25	14	100841769	100997640	17	6	1131240	2.9744	0.0014678
AP002954.4	11	118570123	118581031	3	2	1334371	2.9741	0.0014693
PALM	19	707934	749329	7	5	1227773	2.9732	0.0014735
AGBL5-AS1	2	27271550	27274132	3	1	1337054	2.9725	0.001477
FAM76B	11	95501116	95523946	9	1	1282297	2.9725	0.001477
CDK18	1	205472725	205502921	5	4	1271904	2.9671	0.0015031
PLCL2	3	16925447	17133096	108	15	1206000	2.9666	0.0015055
RP11-755H23.1	2	1798296	1816298	1	1	1332969	2.9665	0.001506
GPRIN3	4	90156533	90229951	6	5	1066054	2.9654	0.0015116
SNX29	16	12069590	12669144	195	32	1284364	2.9651	0.0015129
VWA3A	16	22102861	22169285	19	7	1296934	2.9649	0.0015137
STK10	5	171468082	171616228	35	5	1273214	2.9648	0.0015144
FBXO47	17	37091684	37124656	2	1	939737	2.9636	0.0015203
CTB-152G17.6	7	104742284	104746930	3	3	1285957	2.9624	0.001526
IPO9	1	201797284	201854419	16	4	949623	2.9623	0.0015268
CNTFR-AS1	9	34567009	34583647	7	4	1165668	2.961	0.0015331
UBE3A	15	25577874	25685198	6	3	1191450	2.9609	0.0015337
WDR38	9	127614695	127621169	5	2	1316664	2.9608	0.0015343
DMAP1	1	44678126	44687353	2	2	1106151	2.9579	0.0015488
GALNT2	1	230201984	230418868	30	14	1096946	2.9572	0.0015522
SZT2	1	43854552	43920918	43	7	1263817	2.9563	0.0015566
CADPS2	7	121957464	122527813	101	18	1256676	2.954	0.0015686
RP11-165M1.1	16	12467211	12470889	1	1	1323498	2.9539	0.001569
AGBL5-IT1	2	27282905	27285683	1	1	1342608	2.9537	0.00157
RP11-195B17.1	2	27284295	27286775	1	1	1342608	2.9537	0.00157
RP11-83A16.1	1	246188198	246199905	7	2	1311656	2.9534	0.0015717
MYT1	20	62732746	62874606	25	13	1222610	2.9533	0.0015721
CTD-3185P2.1	15	66779995	66785447	5	2	1265368	2.9526	0.0015756
RBM33	7	155436144	155575179	67	3	1221533	2.9521	0.0015782
DNAAF5	7	765335	827112	9	4	1128521	2.9518	0.0015797
NBEAL1	2	203878597	204090917	62	8	1302480	2.9505	0.0015865
HNRNPUL2	11	62479101	62495929	10	2	1296079	2.95	0.0015888
CNNM2	10	104677050	104850979	174	9	1230539	2.9497	0.0015904
DESI1	22	41993031	42018047	11	3	1134051	2.9494	0.001592
SMCO4	11	93210637	93277674	15	6	1120372	2.9494	0.0015922
ZNF322	6	26633610	26660980	21	5	1328659	2.9492	0.0015932
RD3	1	211648863	211666504	5	3	1336708	2.949	0.0015939
RP11-90B9.2	15	83689987	83694088	3	3	1238310	2.9487	0.0015958
SSR2	1	155977838	155991742	2	1	1313083	2.9482	0.001598
JMY	5	78530953	78624034	56	2	1141300	2.9451	0.0016142
VDAC3	8	42248381	42264455	2	2	1326138	2.9448	0.0016156
CTA-280A3.2	22	48311476	48323013	4	1	1333506	2.9448	0.001616
SLC3A1	2	44501596	44549633	10	3	983044	2.9442	0.0016189
ZSWIM6	5	60627084	60842999	86	7	1088116	2.9435	0.0016226
MRPS14	1	174981093	174993561	5	1	1296041	2.9432	0.0016242
RP11-472I20.3	11	43576985	43695943	42	8	1288661	2.9429	0.0016257
HIF3A	19	46799298	46847690	24	8	1293401	2.9403	0.0016395
ESR2	14	64549949	64805830	31	11	1312744	2.9403	0.0016396
PGPEP1	19	18450407	18481760	5	1	1230361	2.9402	0.00164
RP3-467N11.1	6	101328325	101331869	3	2	1278494	2.9392	0.0016453
HAUS1	18	43683350	43709299	4	2	1261854	2.9386	0.0016486
RP11-90B9.3	15	83687866	83690554	2	2	1093893	2.9377	0.0016534
USP53	4	120132867	120217673	8	3	1314918	2.9366	0.0016592
HIVEP2	6	143071605	143268502	83	14	1236423	2.9364	0.0016601
CTCF	16	67595369	67674080	17	4	1332623	2.9359	0.0016631
ZNF295-AS1	21	43428302	43476239	9	6	1256142	2.9339	0.0016736
TTC28-AS1	22	28314410	28405569	54	7	1096711	2.9339	0.0016737
PAK4	19	39615421	39674456	24	4	1247826	2.9335	0.0016759
TAPBP	6	33266470	33283044	17	5	1290049	2.9333	0.0016767
RN7SL431P	1	154137722	154140025	1	1	1281513	2.9329	0.001679
RP4-569D19.8	22	35921978	35924462	1	1	1088238	2.9325	0.001681
DOK7	4	3464032	3504200	15	6	1304950	2.9323	0.0016822
HOOK1	1	60279620	60342994	17	5	1048826	2.9321	0.0016832
EIF3L	22	38243874	38286414	9	1	1233239	2.9316	0.0016863
RP11-25O3.1	18	49861730	49866395	3	2	1217687	2.9312	0.0016884
SHCBP1L	1	182867999	182923301	2	2	1148782	2.9304	0.0016928
NDUFA13	19	19626033	19640863	16	1	1136887	2.9302	0.0016937
TAP2	6	32788609	32807516	33	8	1304721	2.9301	0.0016945
SPNS1	16	28985092	28996869	4	1	1279902	2.9294	0.001698
LAT	16	28995146	29003105	1	1	1356526	2.9294	0.001698
RGS4	1	163037564	163047592	6	3	1313376	2.9293	0.0016985
NINL	20	25432332	25567167	46	8	1176292	2.929	0.0017005
RP11-6N17.10	17	46056763	46074562	2	2	1123795	2.9289	0.0017009
C6orf163	6	88053530	88076181	18	2	1303203	2.9282	0.0017045
EMILIN1	2	27300482	27310271	4	1	1344795	2.9278	0.0017071
FAM98C	19	38892732	38900724	1	1	1273058	2.9265	0.001714
RAC2	22	37620309	37641488	16	5	1238876	2.9258	0.001718
PFDN6	6	33256078	33267178	6	4	1294679	2.9253	0.0017206
LINC01685	1	38939496	38982946	10	2	1154551	2.9242	0.0017269
RNU4-82P	9	127648688	127650828	1	1	1264576	2.9238	0.001729
NFATC2IP	16	28961127	28979413	1	1	1311261	2.9238	0.001729
LIMD1-AS1	3	45716860	45731671	3	3	1327429	2.923	0.0017335
ABCG8	2	44065109	44111127	94	10	1309666	2.9216	0.0017411
ZKSCAN1	7	99612194	99640312	12	4	974708	2.9215	0.001742
BMP5	6	55617450	55741388	4	3	1115765	2.92	0.0017499
CDKN1C	11	2903442	2908005	1	1	1066739	2.9193	0.001754
TTC21A	3	39148170	39181391	11	5	1244055	2.9172	0.0017662
PTPN1	20	49125857	49202778	57	7	1151934	2.9168	0.0017679
SELENOP	5	42798981	42826998	16	3	1202625	2.9168	0.0017683
CACNA2D1	7	81574759	82074272	100	26	1080217	2.9167	0.0017687
AL133243.2	2	32750570	32755574	1	1	1150158	2.9167	0.001769
HOXC11	12	54365909	54372427	4	1	1253625	2.9163	0.001771
MDM4	1	204484506	204528248	58	5	1229997	2.9157	0.0017746
MACROD1	11	63765029	63934585	22	6	1204405	2.9157	0.0017747
RP11-503P10.1	2	27275485	27278144	1	1	1282316	2.9123	0.001794
LINC02086	17	46723284	46784692	7	2	1330840	2.9119	0.0017963
MDH1	2	63814742	63835331	18	3	1036769	2.9118	0.0017966
CNTFR	9	34550429	34591138	14	5	1137562	2.9111	0.0018009
CHRM4	11	46404338	46414326	1	1	1173716	2.9109	0.001802
FMNL2	2	153190687	153507340	176	26	1156879	2.9106	0.0018036
AZGP1P1	7	99577363	99586461	2	2	782863	2.9087	0.0018149
LEAP2	5	132208359	132211738	2	1	1271827	2.9074	0.001822
PHLPP2	16	71677826	71759604	55	5	1307827	2.9072	0.0018236
STIM2	4	26861415	27028003	37	7	1063305	2.9066	0.001827
PLEKHM1	17	43512265	43569124	2	2	1259948	2.9064	0.0018282
TMEM170B	6	11536981	11584757	3	2	1247406	2.9057	0.001832
SPAST	2	32287624	32383706	40	5	1286569	2.9055	0.0018331
RP11-371F15.3	4	139740110	139934800	38	14	1179686	2.9044	0.0018401
NAT8B	2	73926702	73929467	1	1	1378215	2.9033	0.001846
TMEM120B	12	122149657	122220974	17	6	1233567	2.9024	0.0018516
RASAL2	1	178062238	178454282	197	12	1283097	2.9017	0.0018559
PPAT	4	57258527	57302781	18	3	1217903	2.9013	0.0018581
RAB7A	3	128411511	128545785	33	6	1282631	2.901	0.0018597
RGL2	6	33258430	33267719	4	3	1308475	2.9005	0.001863
SPATA3	2	231854038	231890770	22	3	1298035	2.8996	0.0018683
CLEC12A	12	10102914	10139194	3	3	1219835	2.8995	0.0018688
CTC-498M16.4	5	87728708	87795514	3	2	1159281	2.8994	0.0018692
RP11-539L10.4	4	6692721	6695697	4	2	1273292	2.8988	0.0018732
[truncated: 13,594 more rows]

[truncated: 19 more sheets: S10.AA.MAGMA, S11.LA.MAGMA, S12.AA.EA.MAGMA, S13.EA.LA.MAGMA, S14.AA.EA.LA.MAGMA, S15.EA.mapped.genes, S16.LA.mapped.genes, S17.AA.EA.mapped.genes, S18.EA.LA.mapped.genes, S19.AA.EA.LA.mapped.genes, S20.prioritized.genes, S21.dissection.high.exp.enrich, S22.dissection.low.exp.enrich, S23.celltype.high.exp.enrich, S24.celltype.low.exp.enrich, S25.h2.h2_explained, S26.genetic_correlation, S27.drug.repurposing, S28.description.Clinformatics®]
