# Supplementary material for: Genome-wide meta-analyses of cross substance use disorders in European, African, and Latino ancestry populations
Source: Research Square preprint supplement (doi:10.21203/rs.3.rs-3955955/v1), 2024-07-16
Supplement: Supplementary file 1 [file 9213466b720d33010b849cd7.docx]

**Supplemental Figure 1**: Manhattan plots. Only concordant variants are shown. A: EA; B: AA; C: LA; D: meta-analysis of AA and EA; E: meta-analysis of EA and LA; F: meta-analysis of AA, EA, and LA.

**Supplemental Figure 2**. LocusZoom plot of each locus in different populations. Note: Only concordant variants were plotted.

**Supplemental Figure 3**: Manhattan plots of gene-based analyses. A: EA; B: AA; C: LA; D: meta-analysis of AA and EA; E: meta-analysis of EA and LA; F: meta-analysis of AA, EA, and LA.

**Supplemental Figure 1**: Manhattan plots. Only concordant variants are shown. A: EA; B: AA; C: LA; D: meta-analysis of AA and EA; E: meta-analysis of EA and LA; F: meta-analysis of AA, EA, and LA.

A: EA


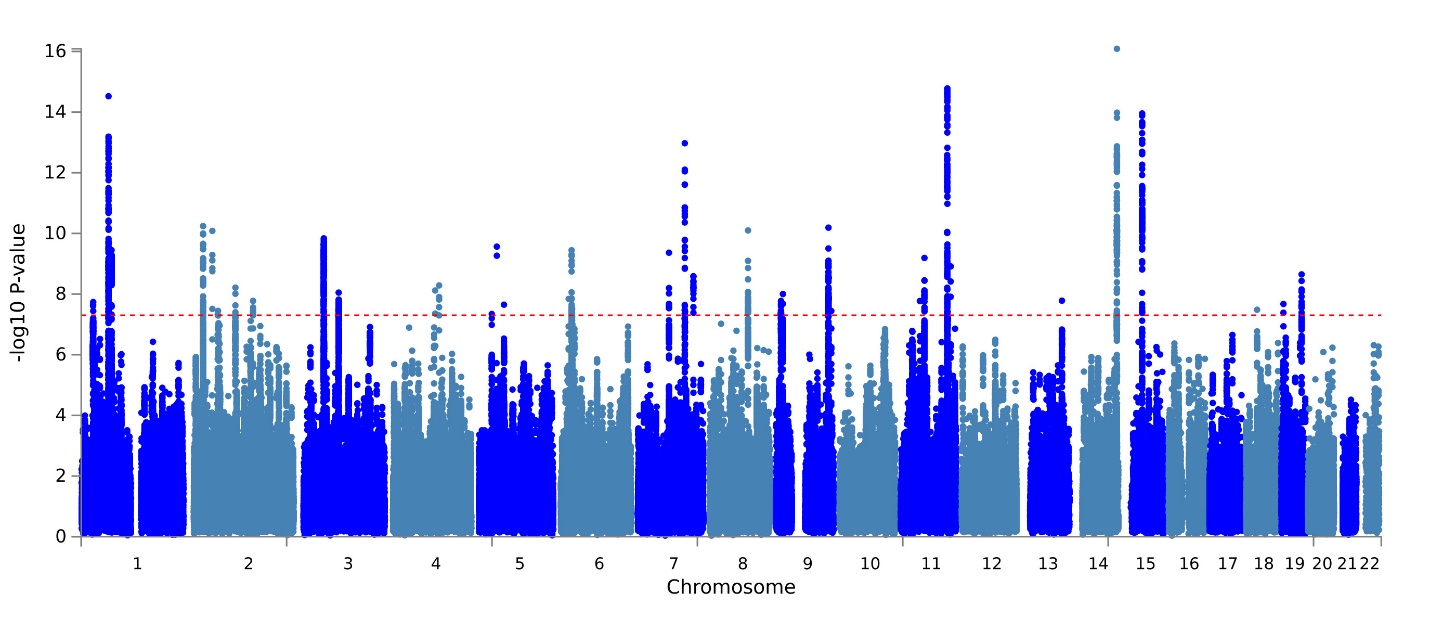


B: AA


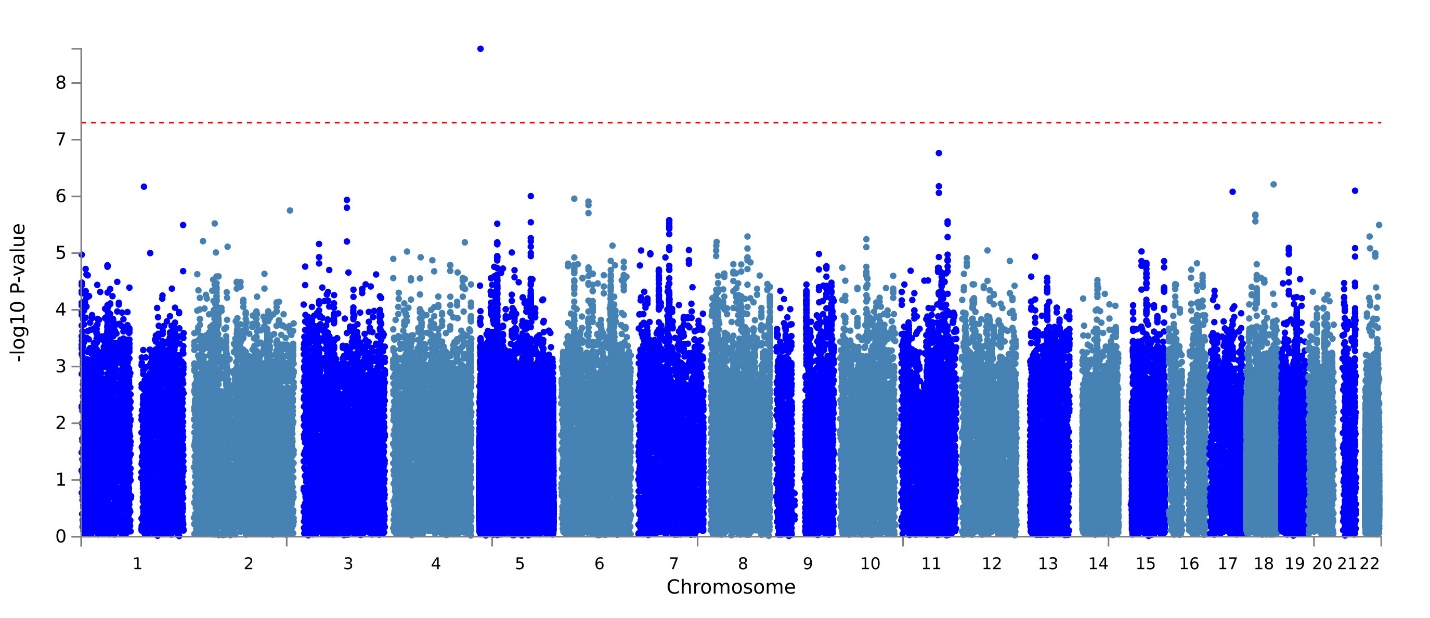


C: LA


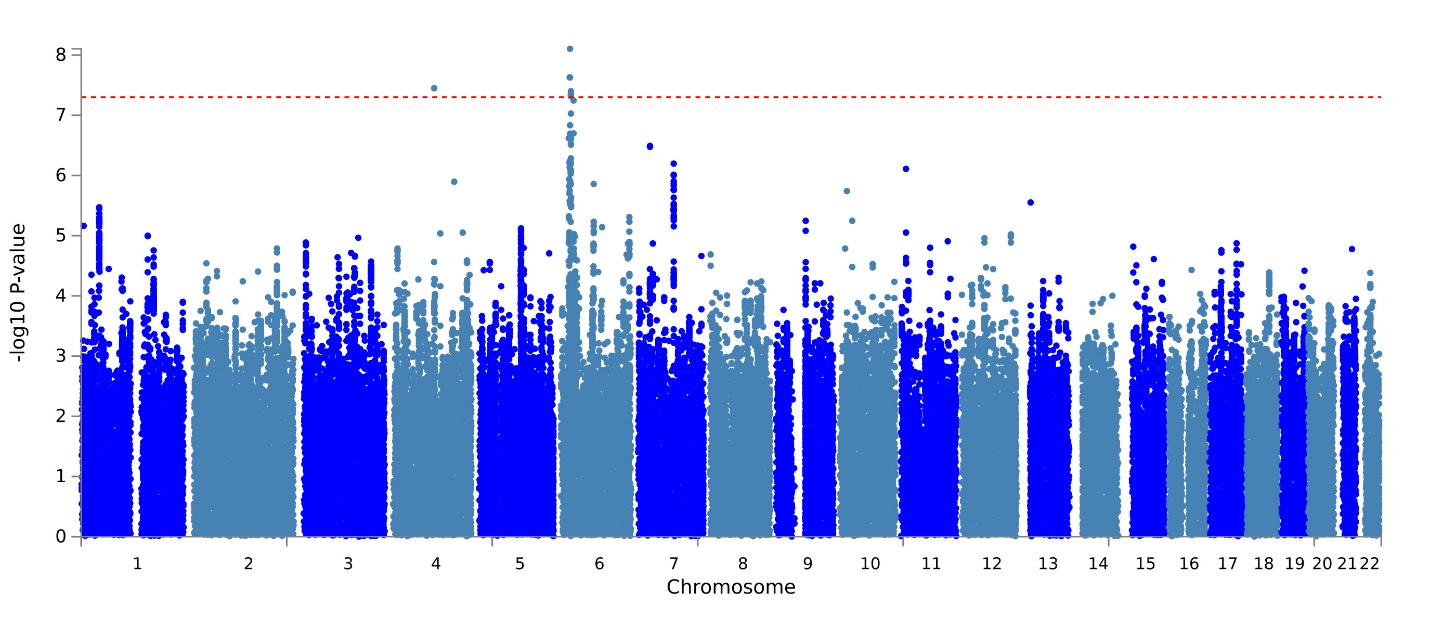


D: meta-analysis of AA and EA


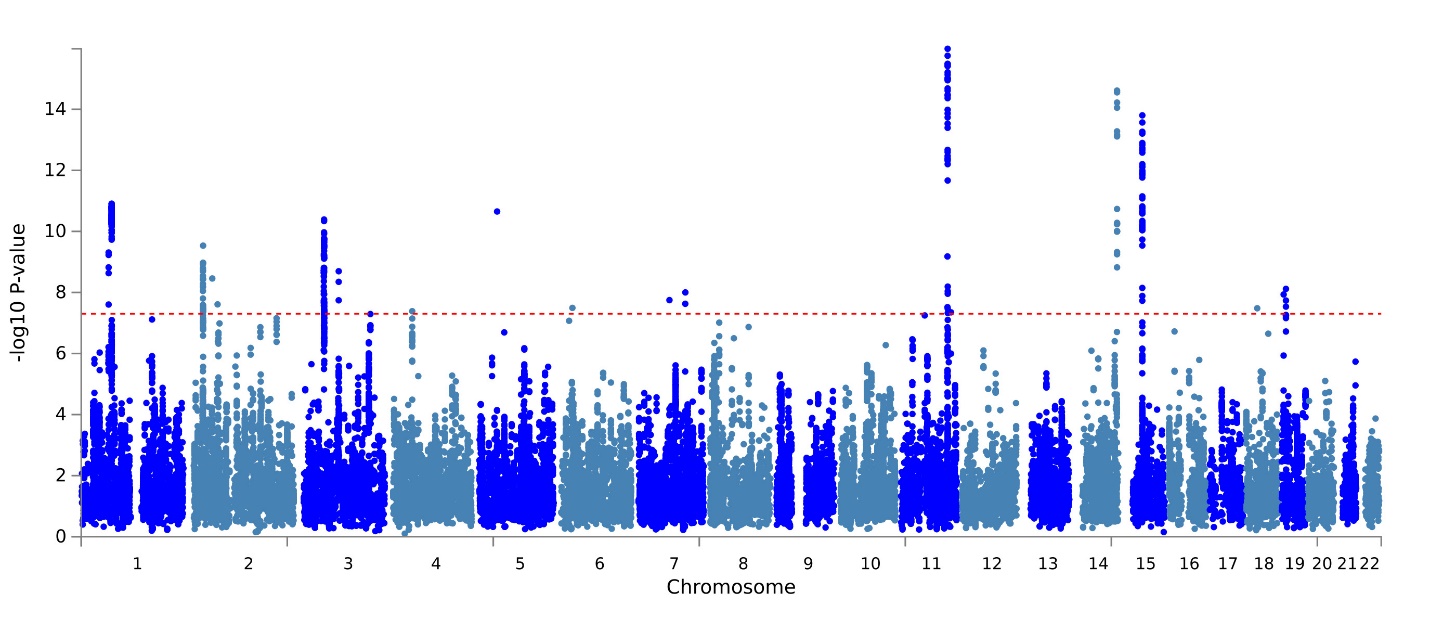


E: meta-analysis of EA and LA


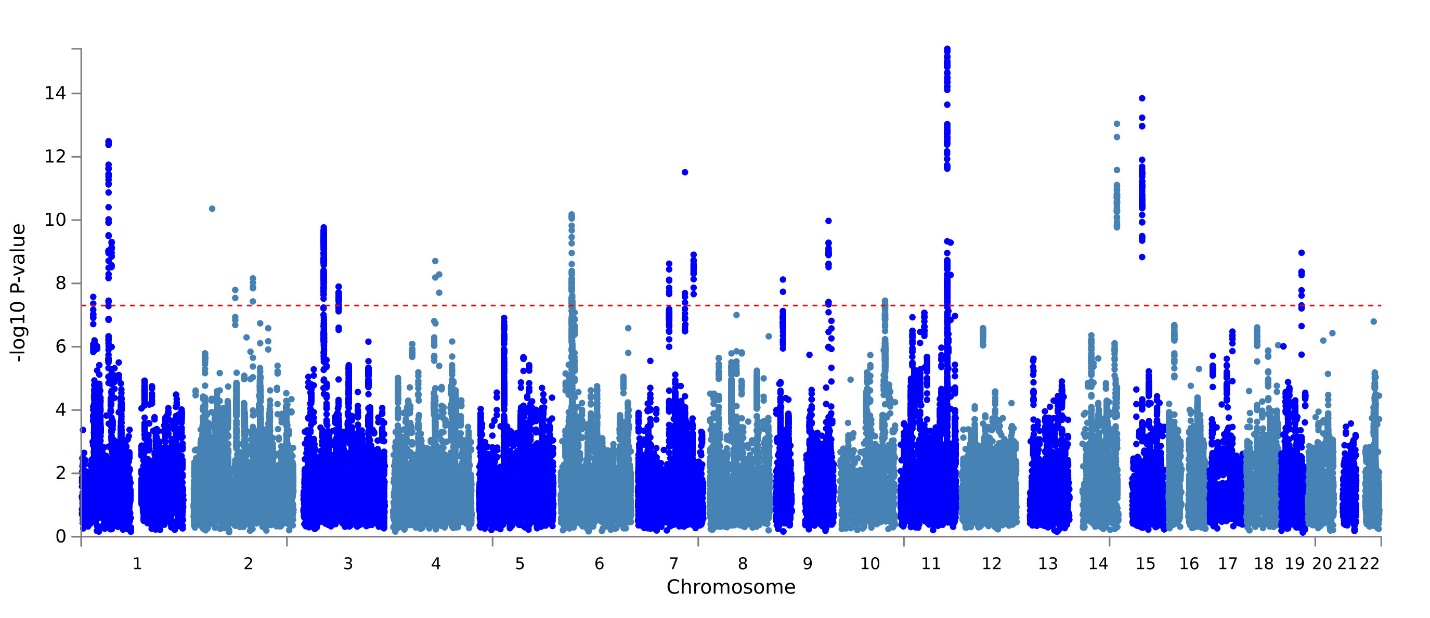


F: meta-analysis of AA, EA, and LA


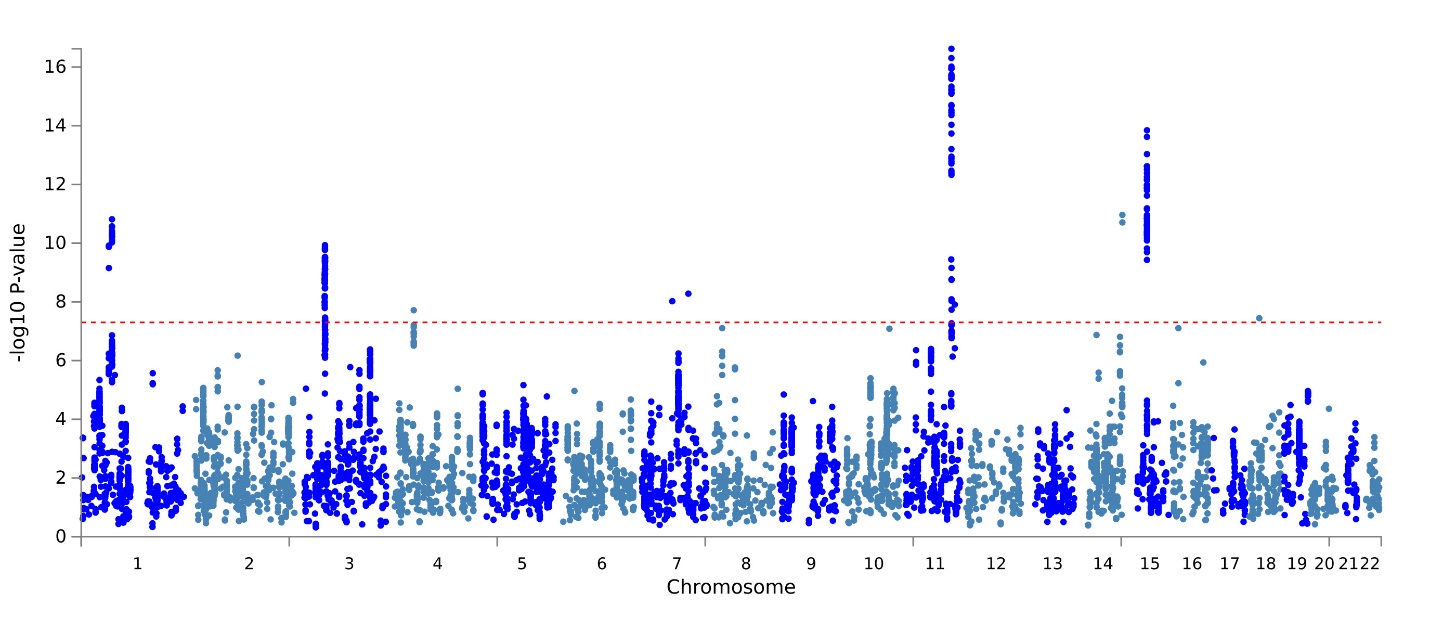


**Supplemental Figure 2**. LocusZoom plot of each locus in different populations. Note: Only concordant variants were plotted.

Locus 1 EA:


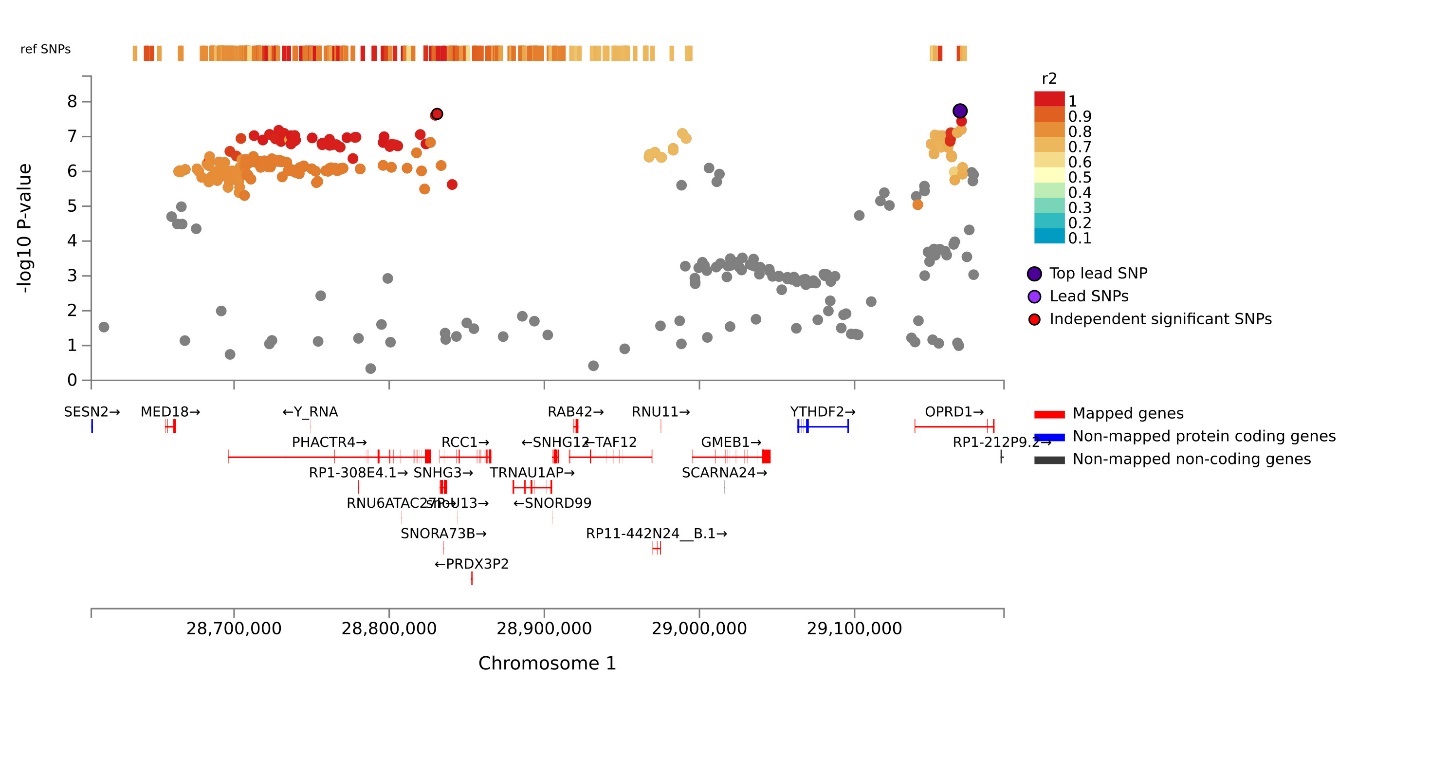


Locus 1 EA_LA:


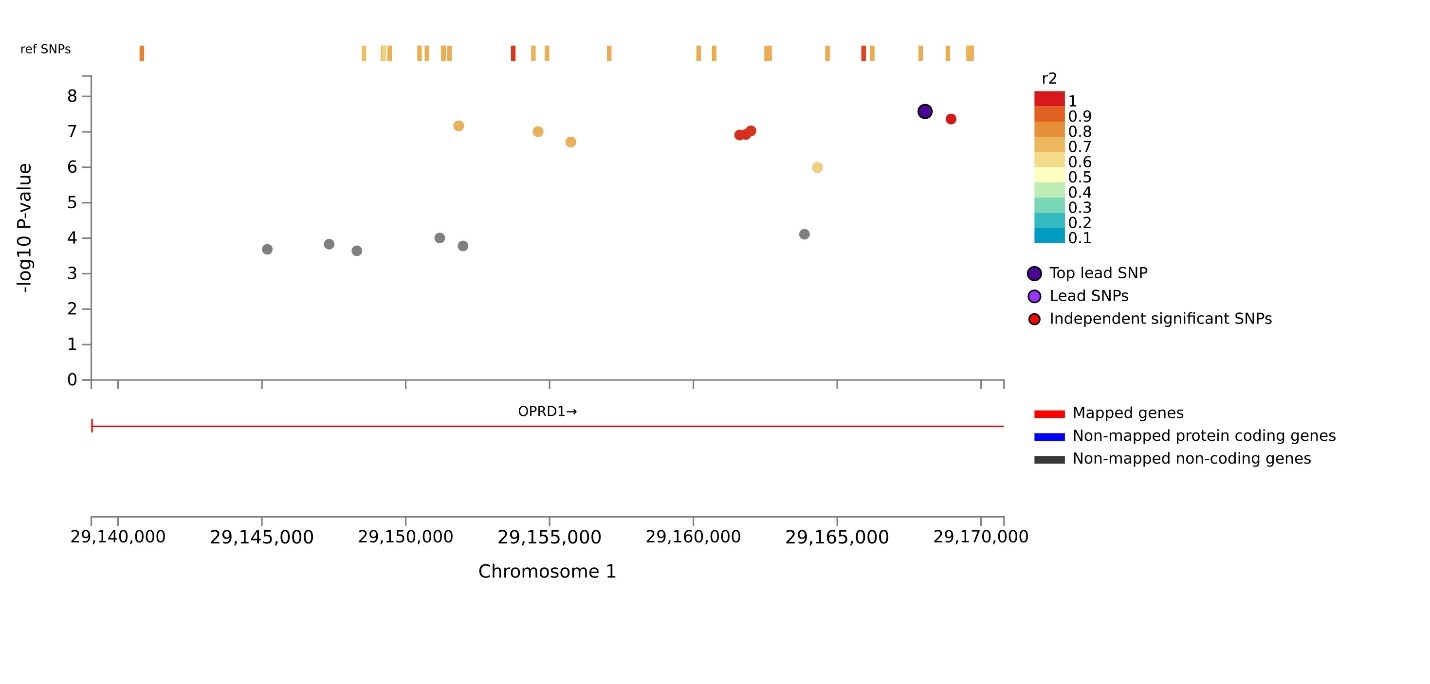


Locus 2 EA:


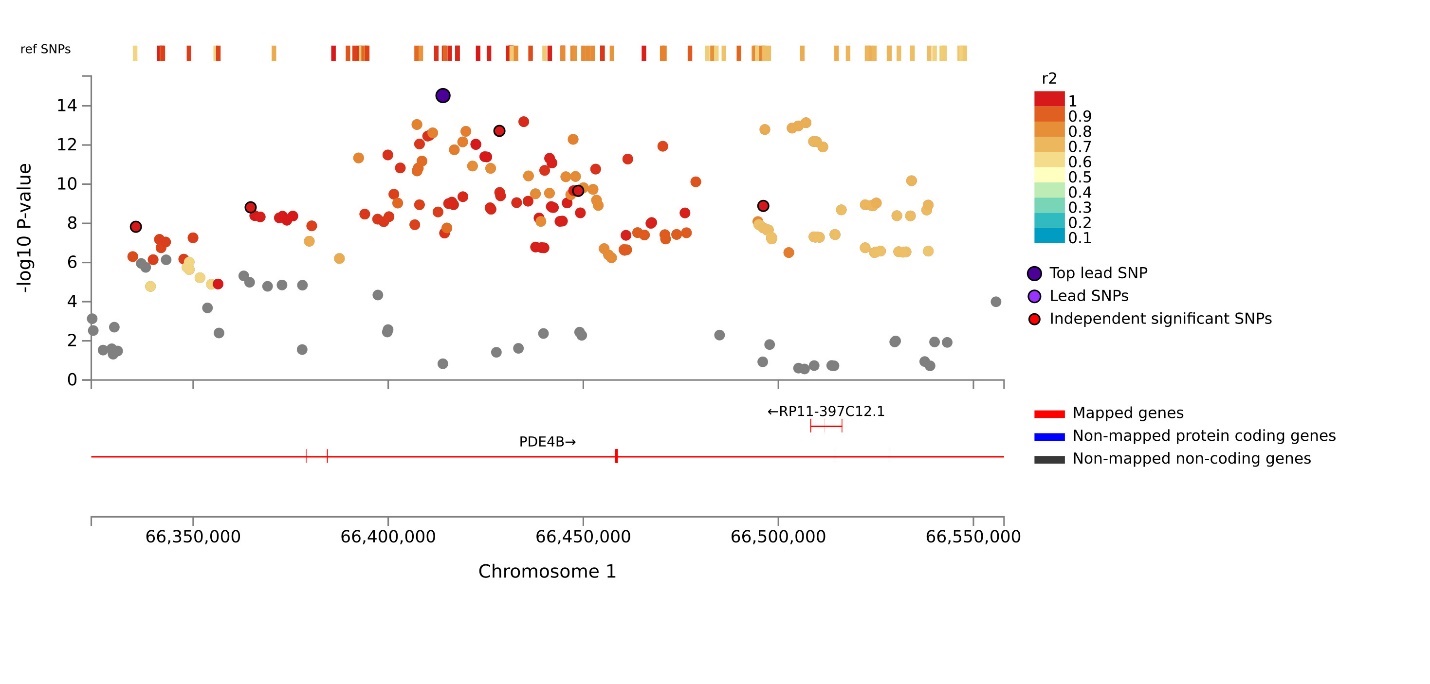


Locus 2 AA_EA:


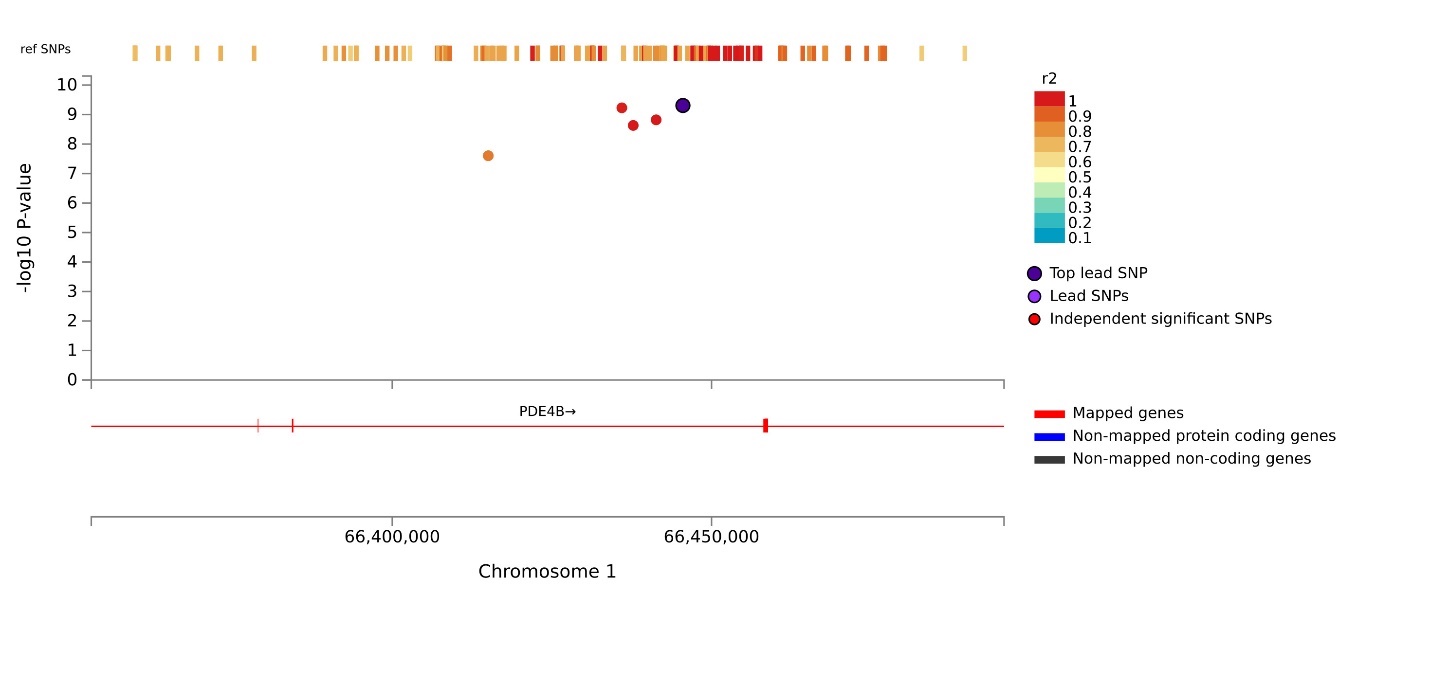


Locus 2 EA_LA:


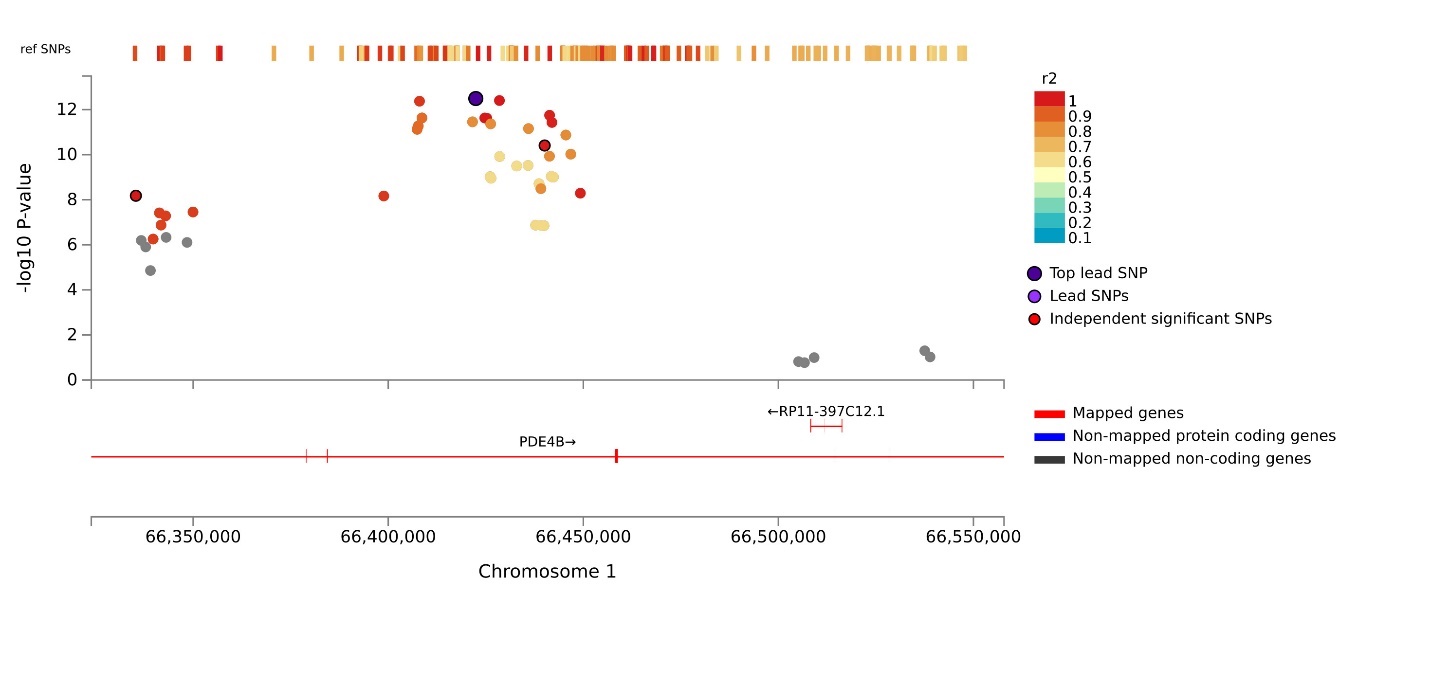


Locus 2 AA_EA_LA:


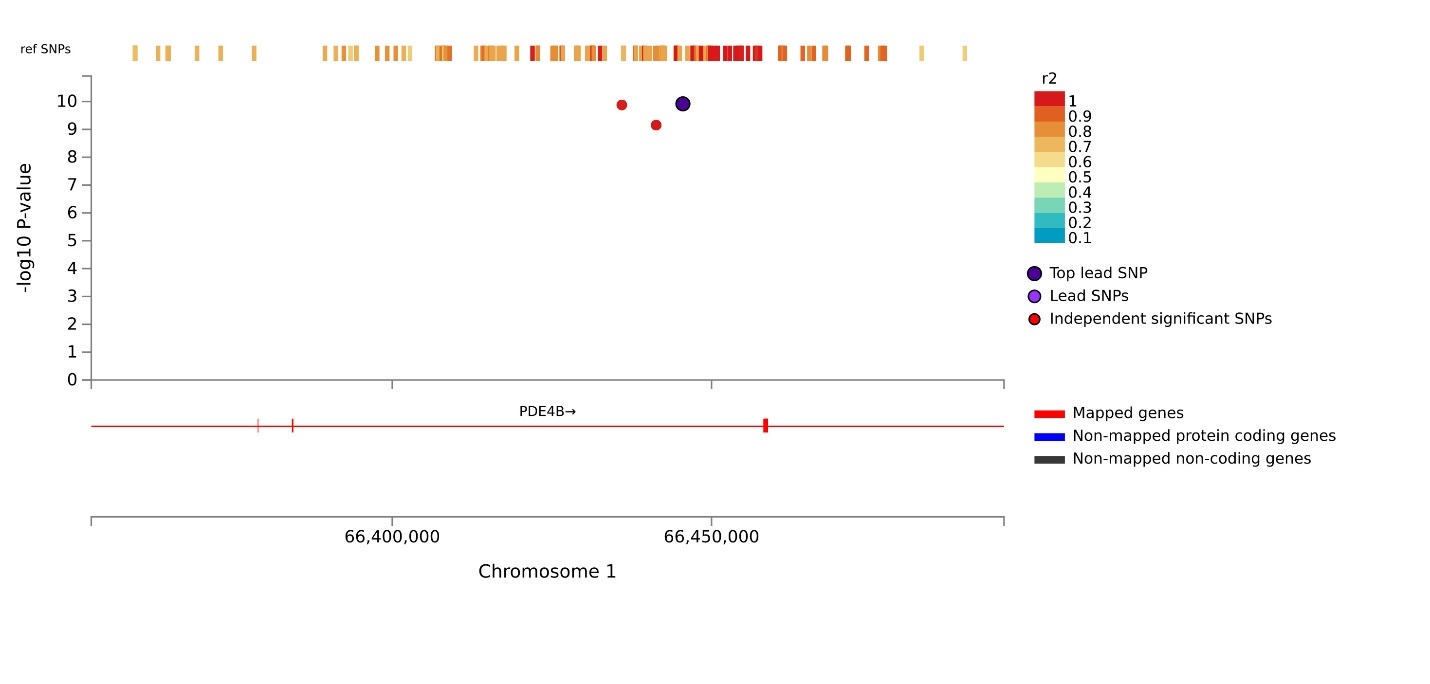


Locus 3 AA_EA:


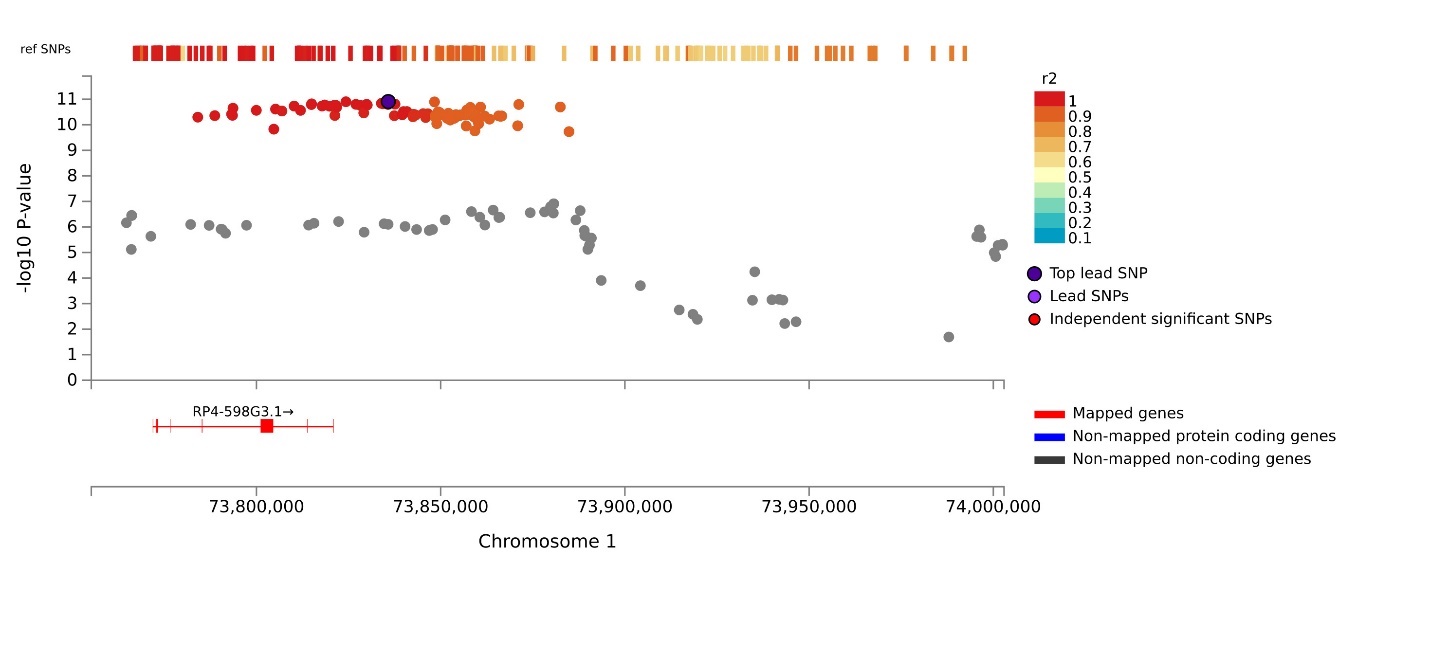


Locus 3 EA:


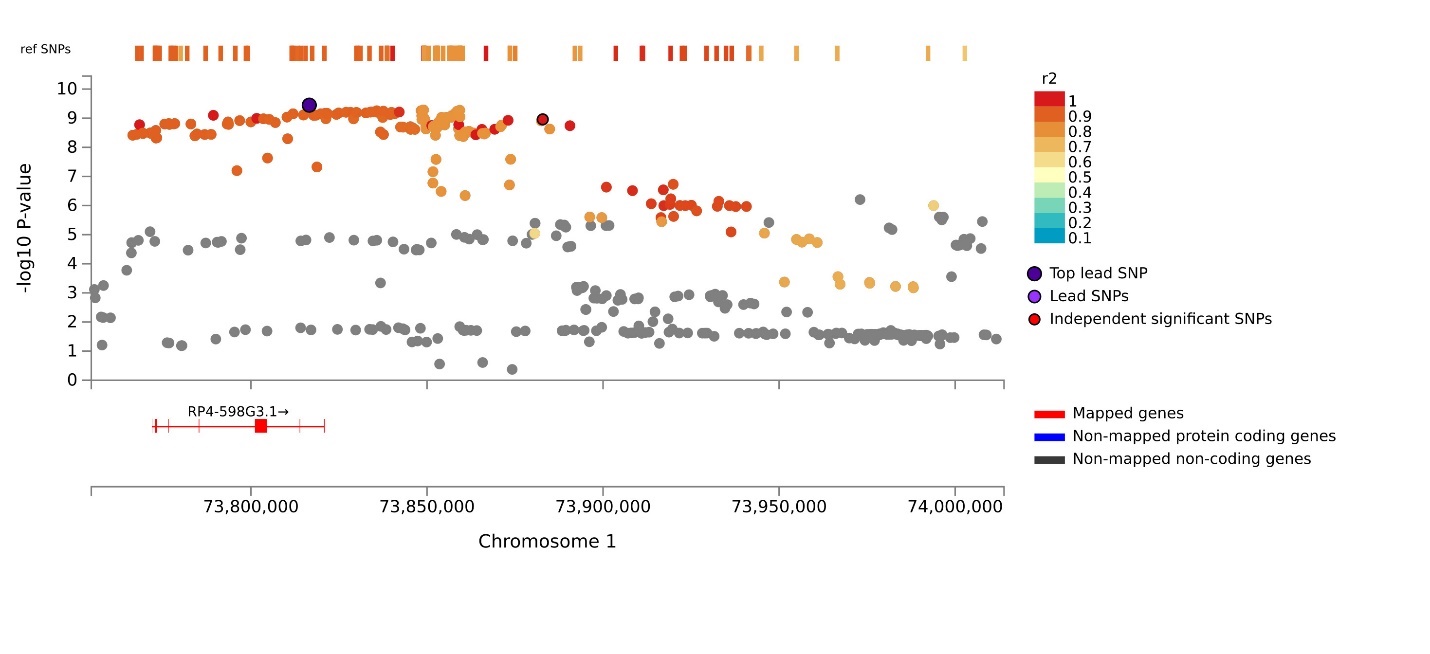


Locus 3 EA_LA:


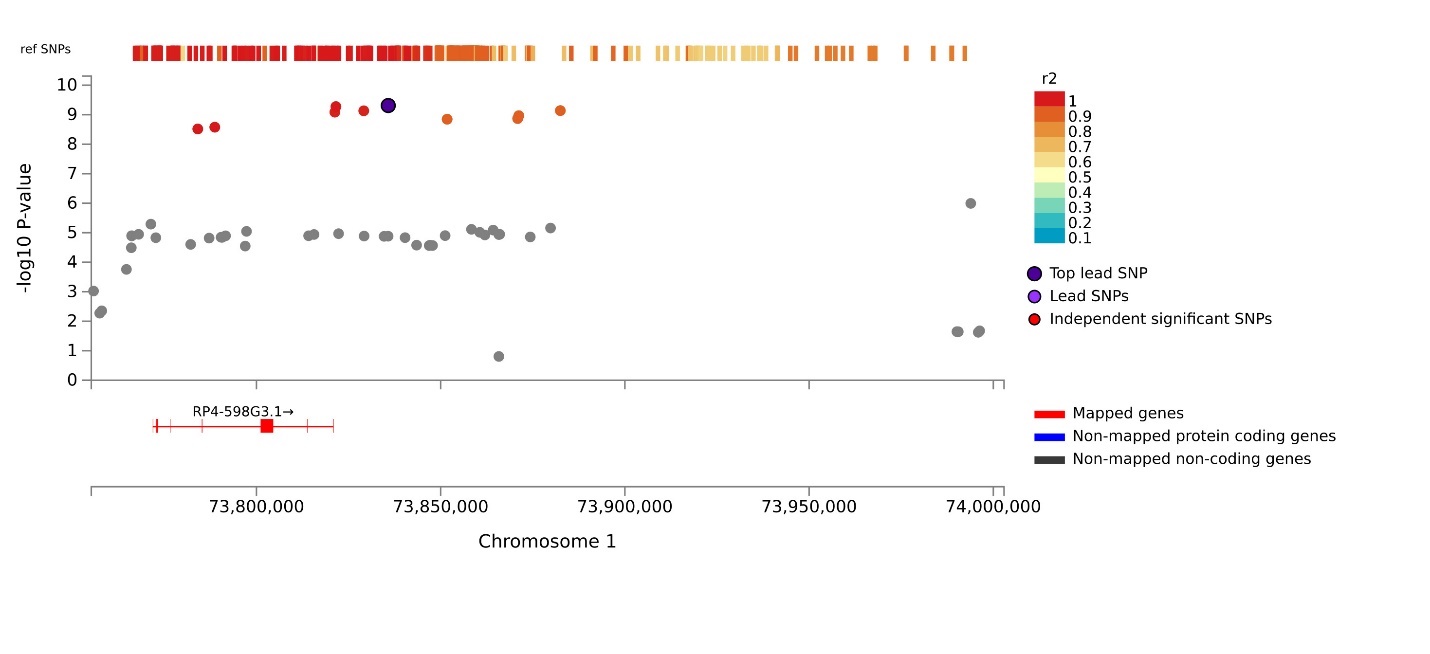


Locus 3 AA_EA_LA:


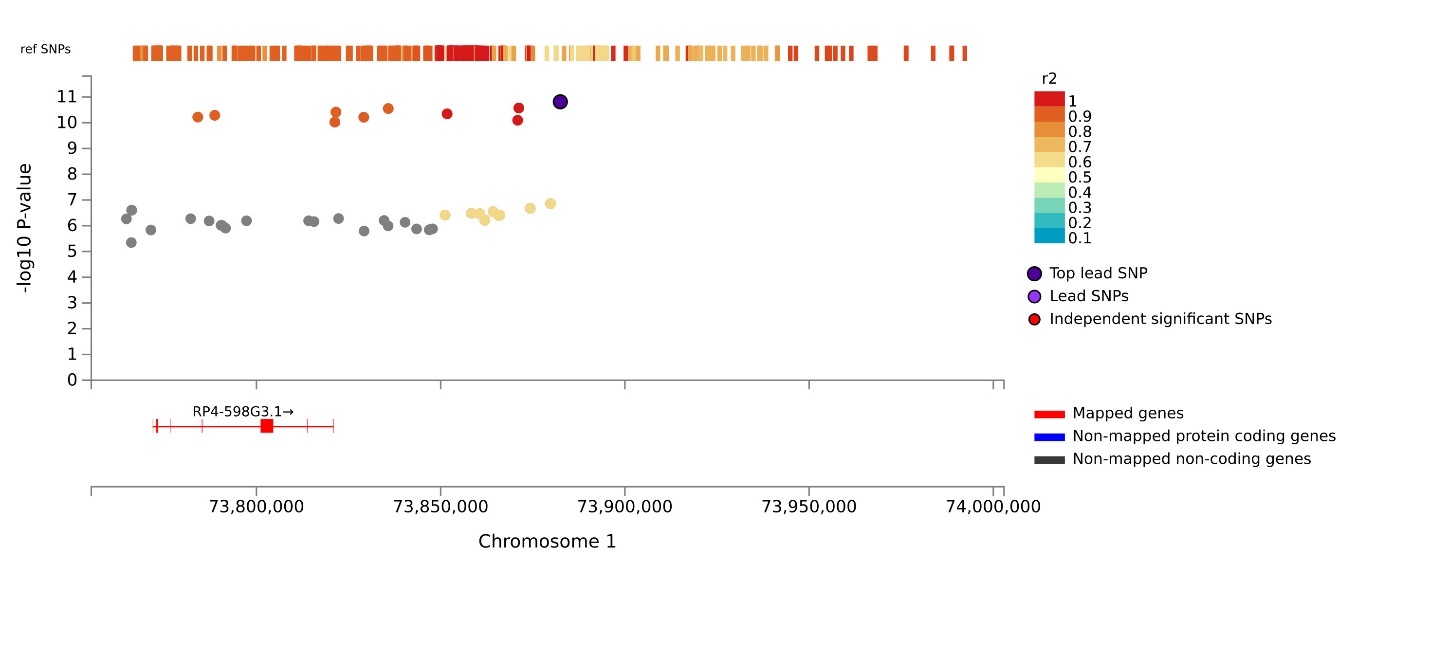


Locus 4 EA:


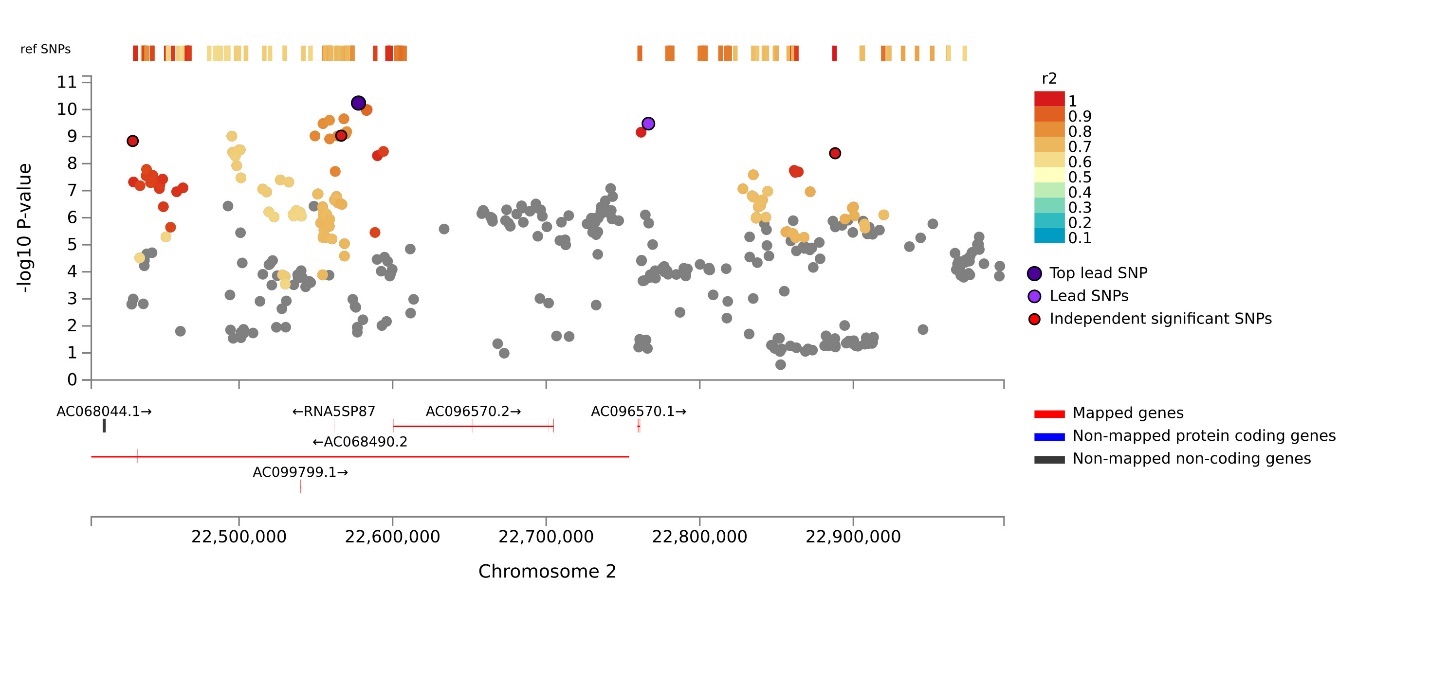


Locus 4 AA_EA rs11124367:


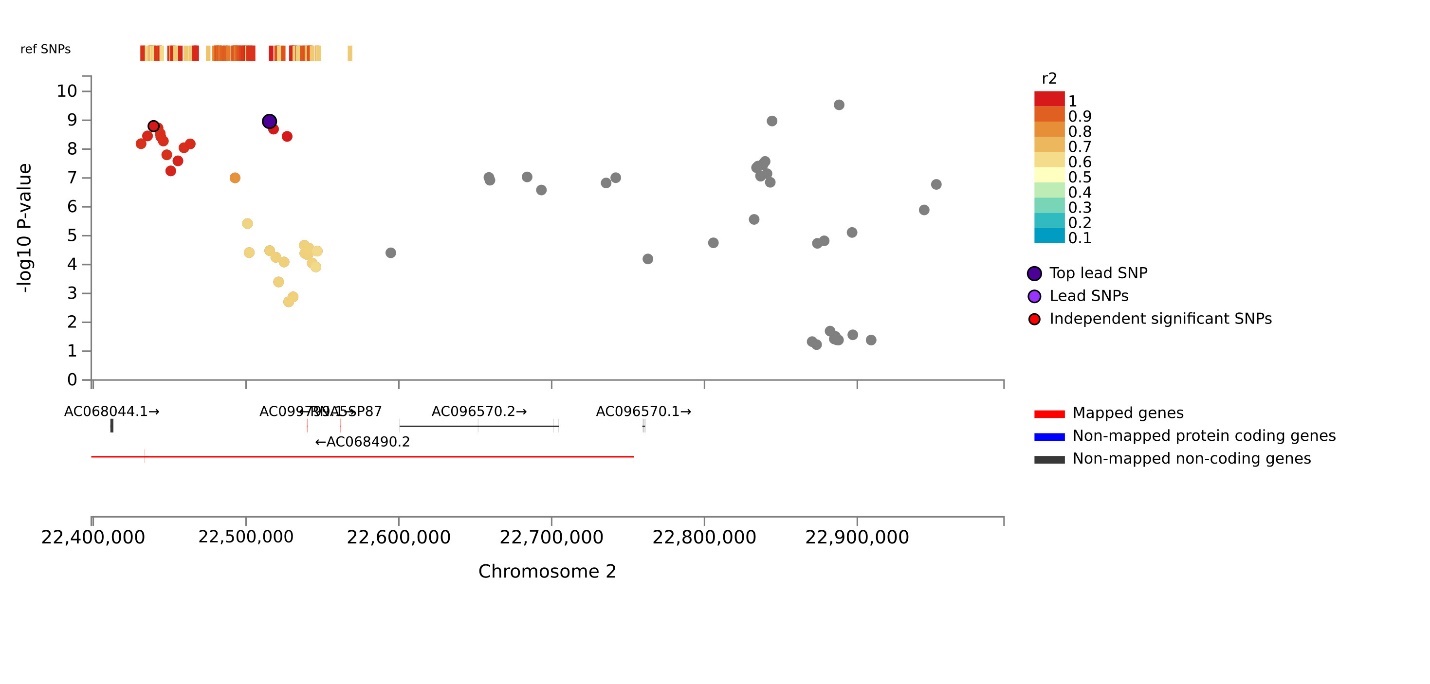


Locus 4 EA_ rs13012903:


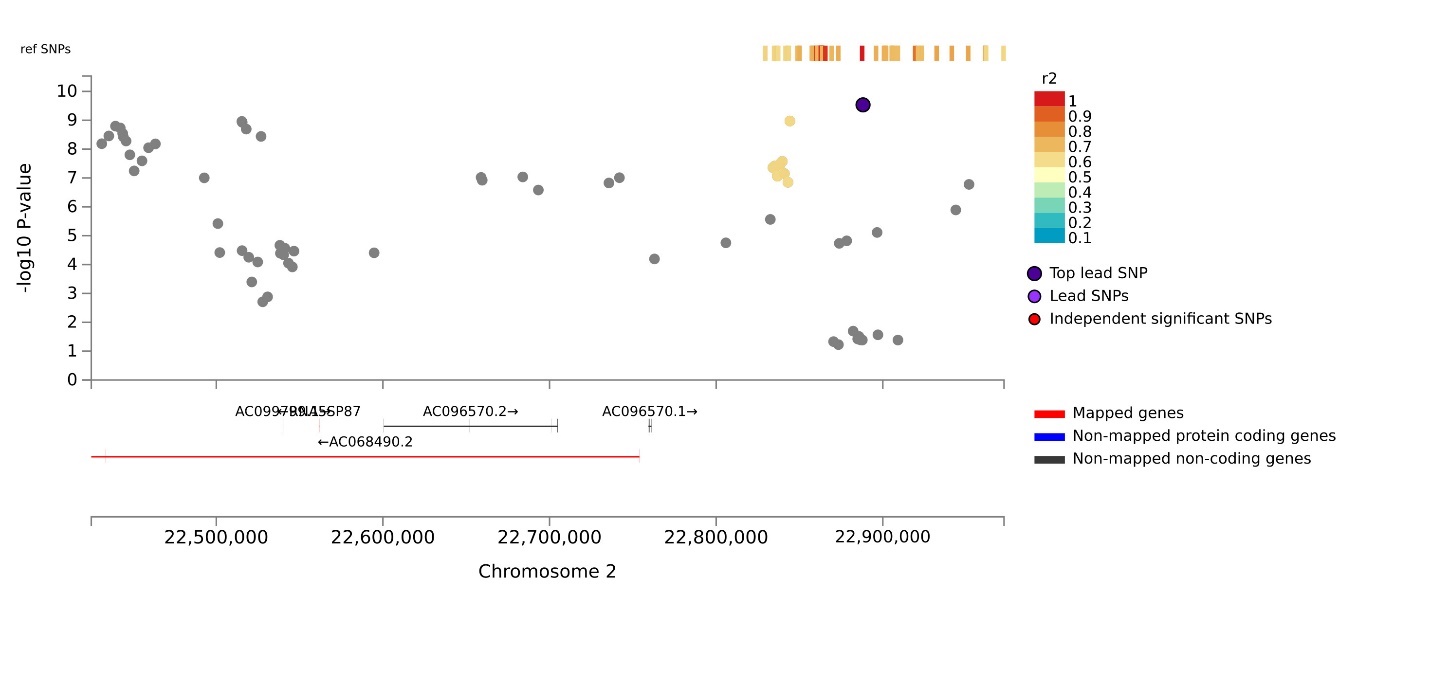


Locus 5 EA_LA:


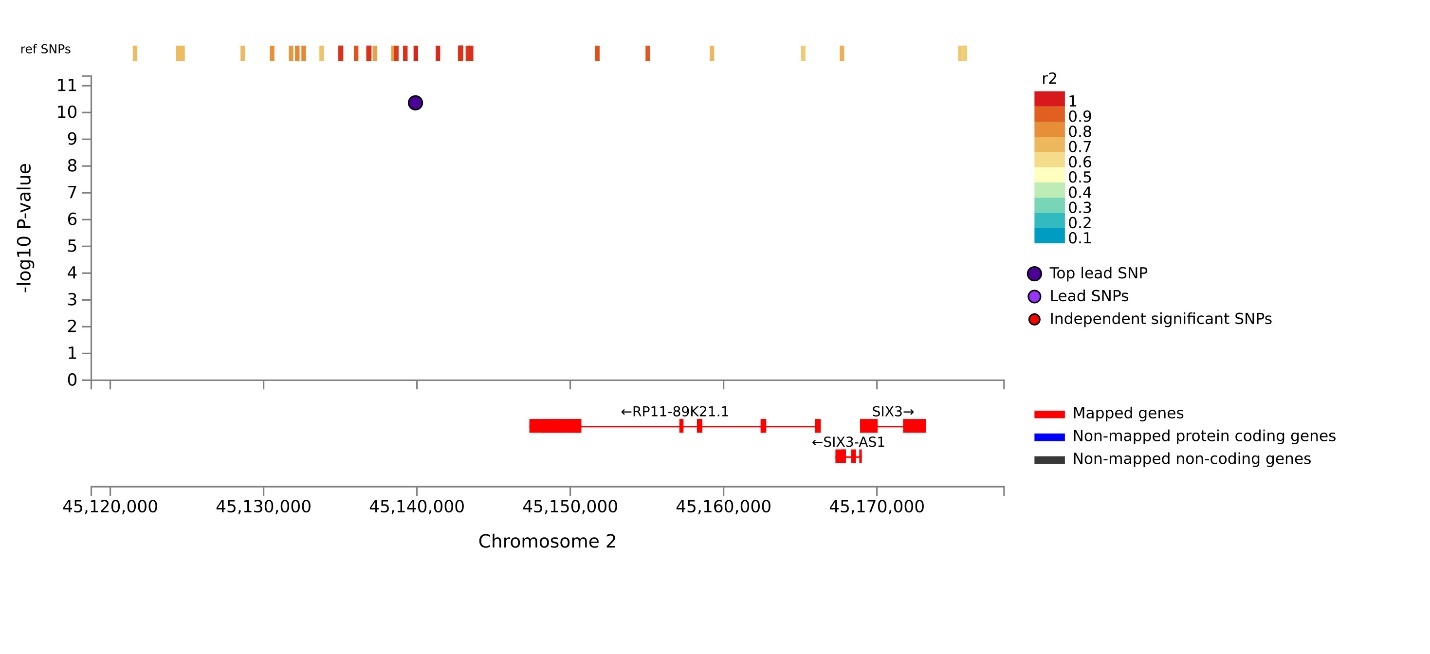


Locus 5 EA:


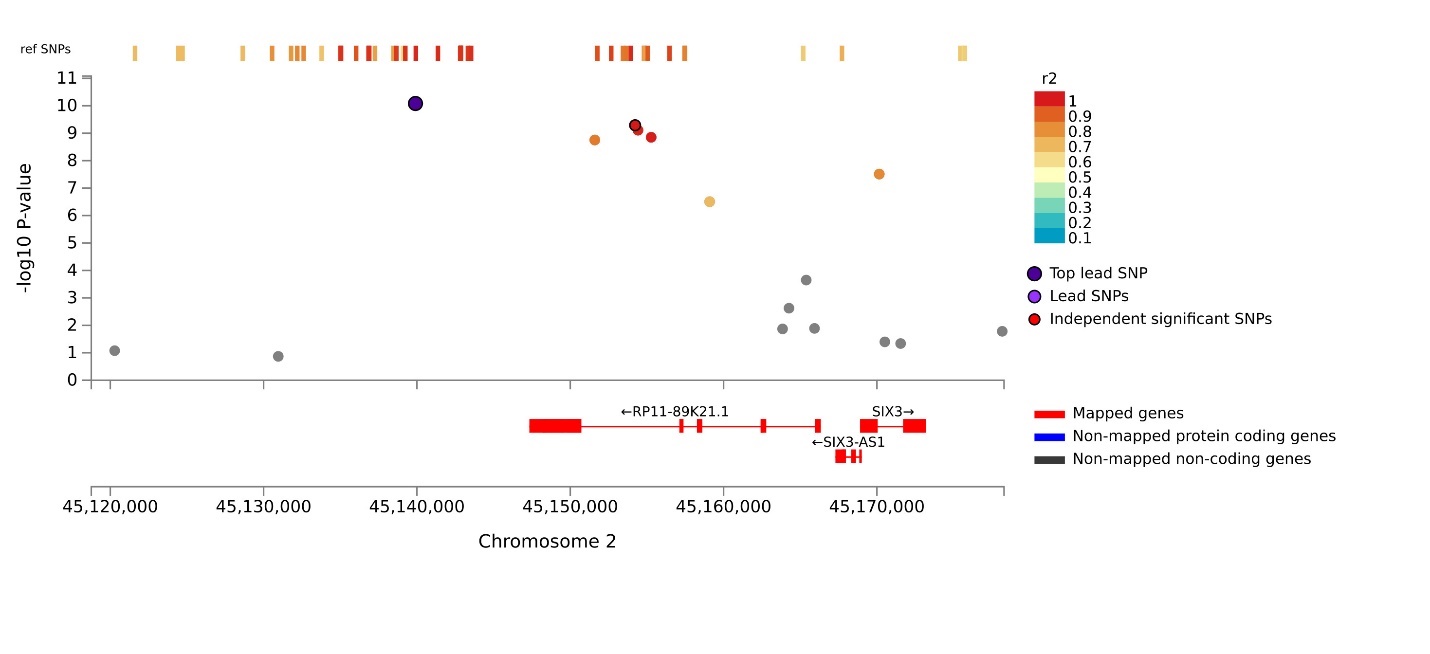


Locus 5 AA_EA:


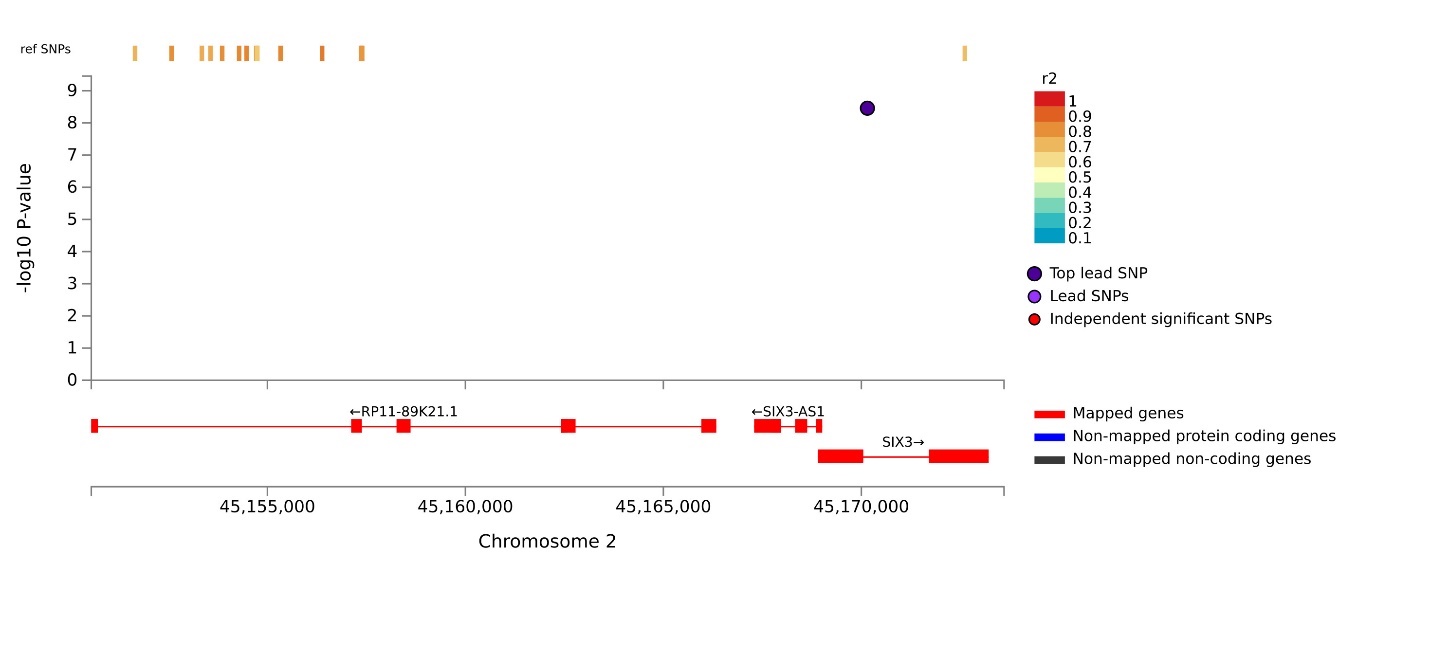


Locus 6 AA_EA:


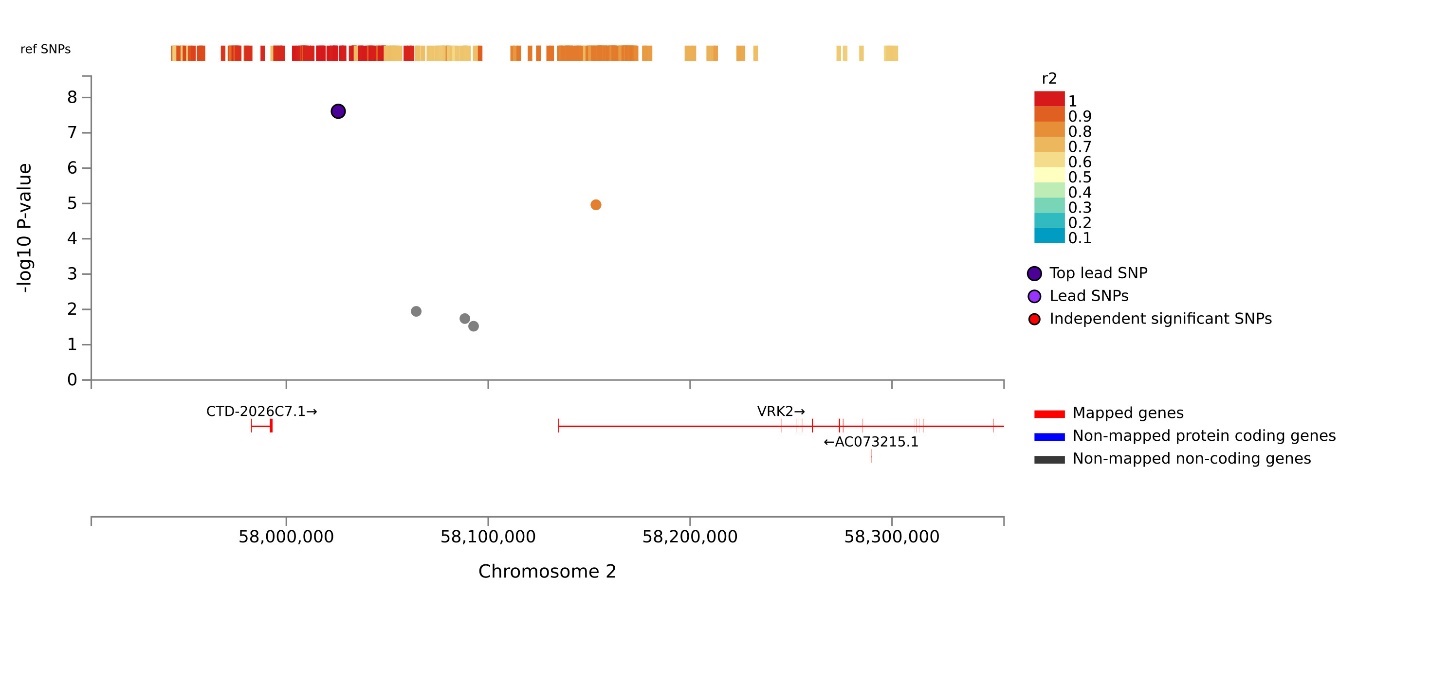


Locus 6 EA:


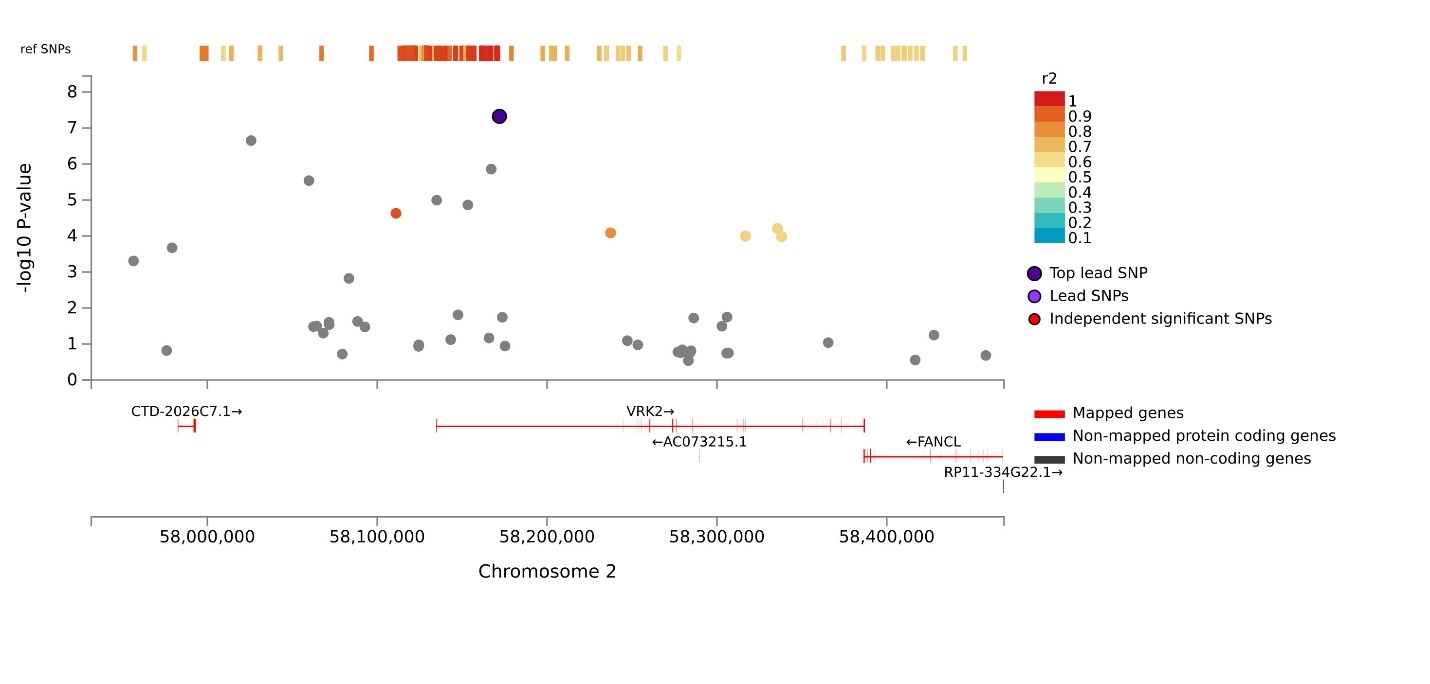


Locus 7 EA:


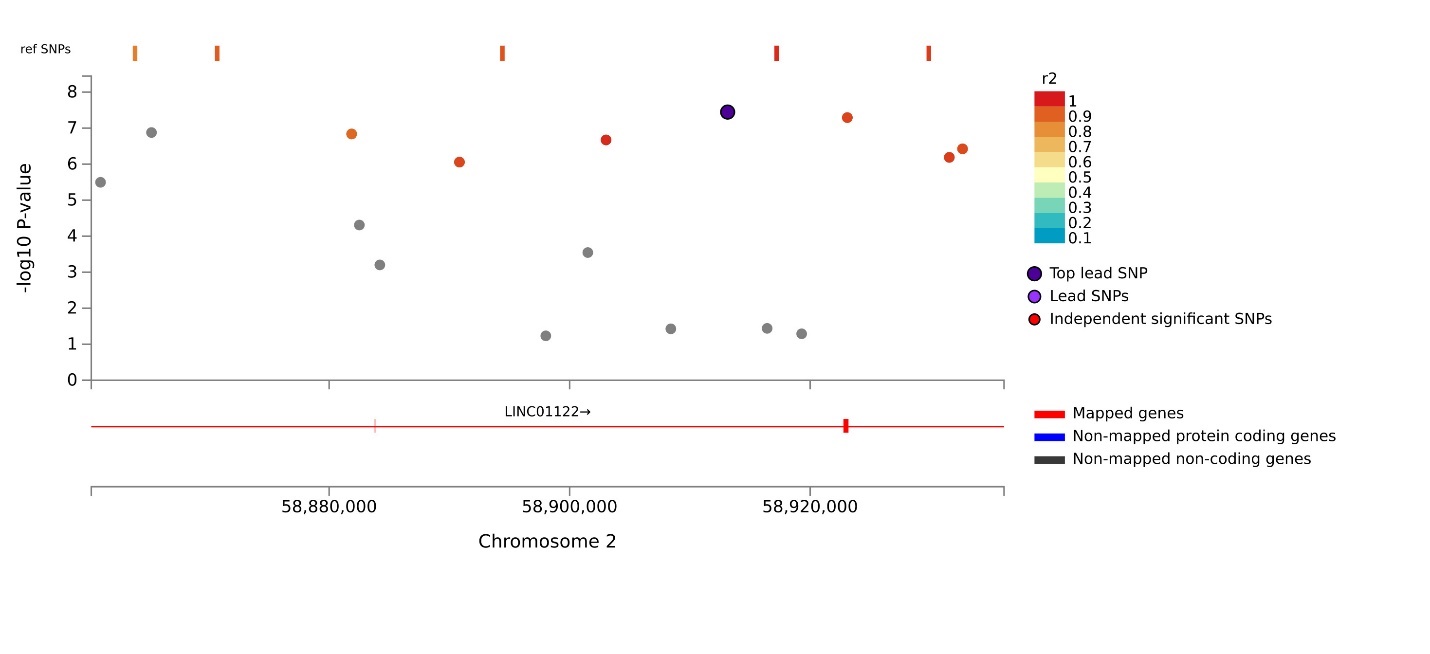


Locus 8 EA:


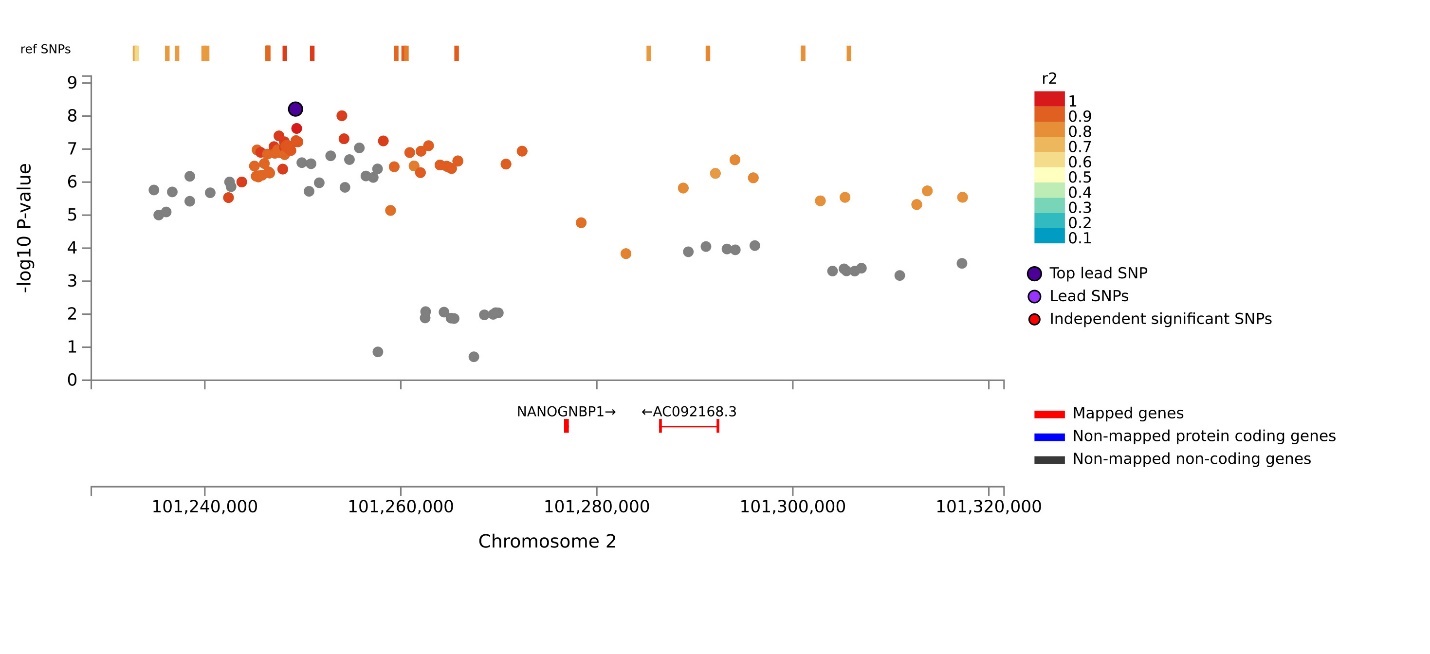


Locus 8 EA_LA:


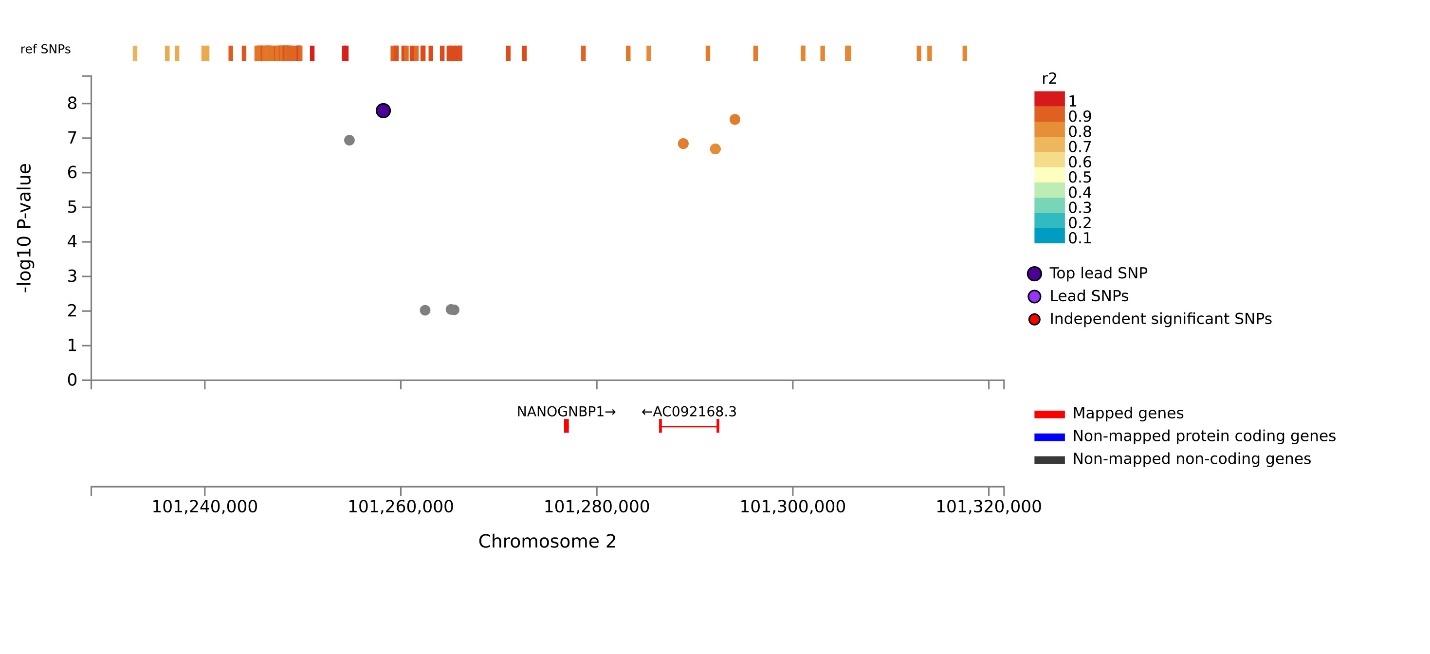


Locus 9 EA_LA:


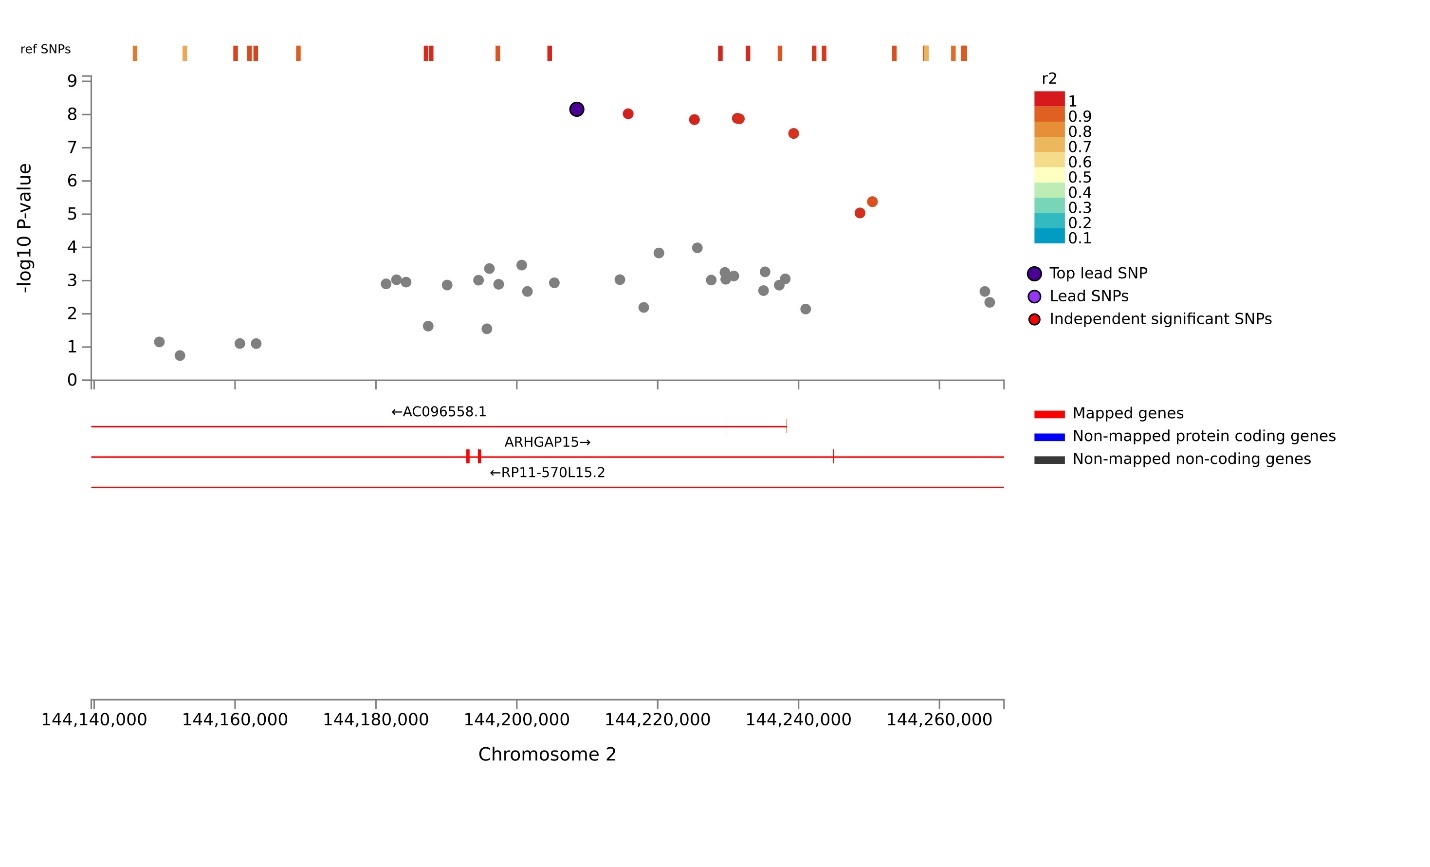


Locus 9 EA:


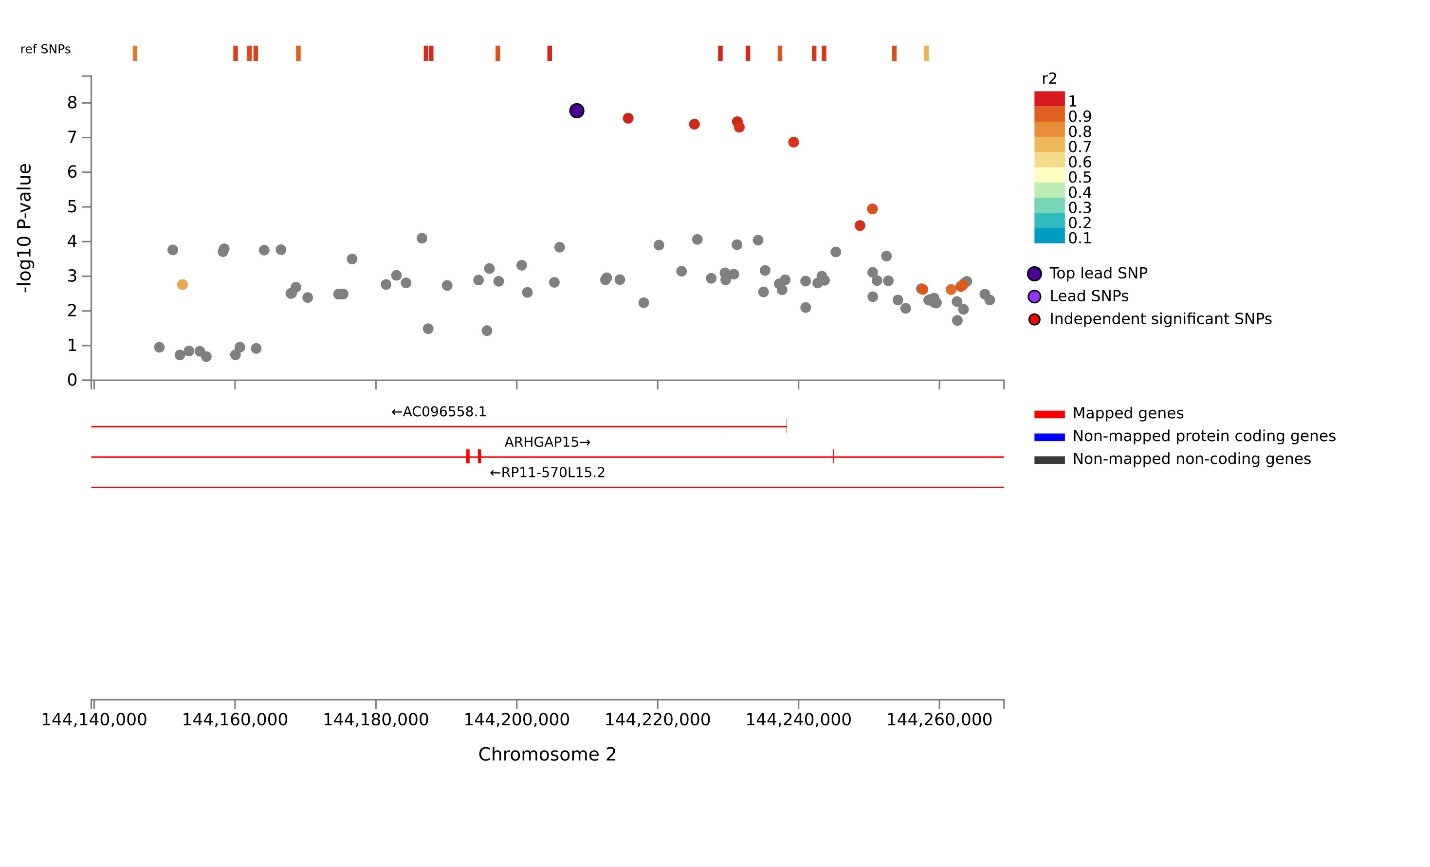


Locus 10 AA_EA:


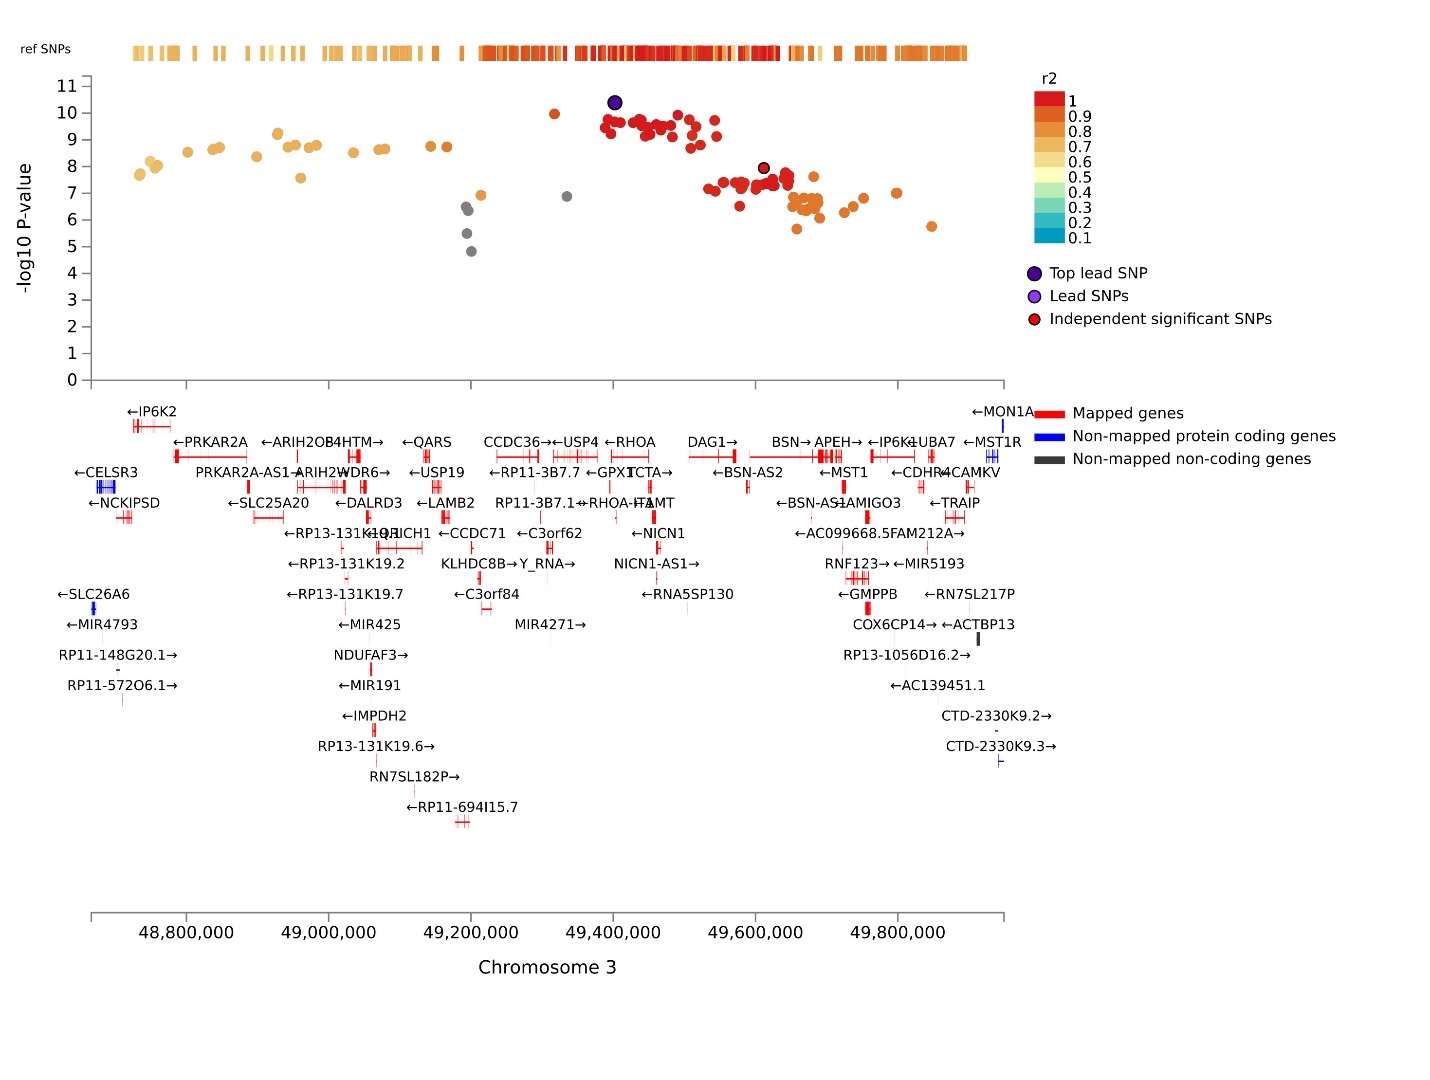


Locus 10 EA:


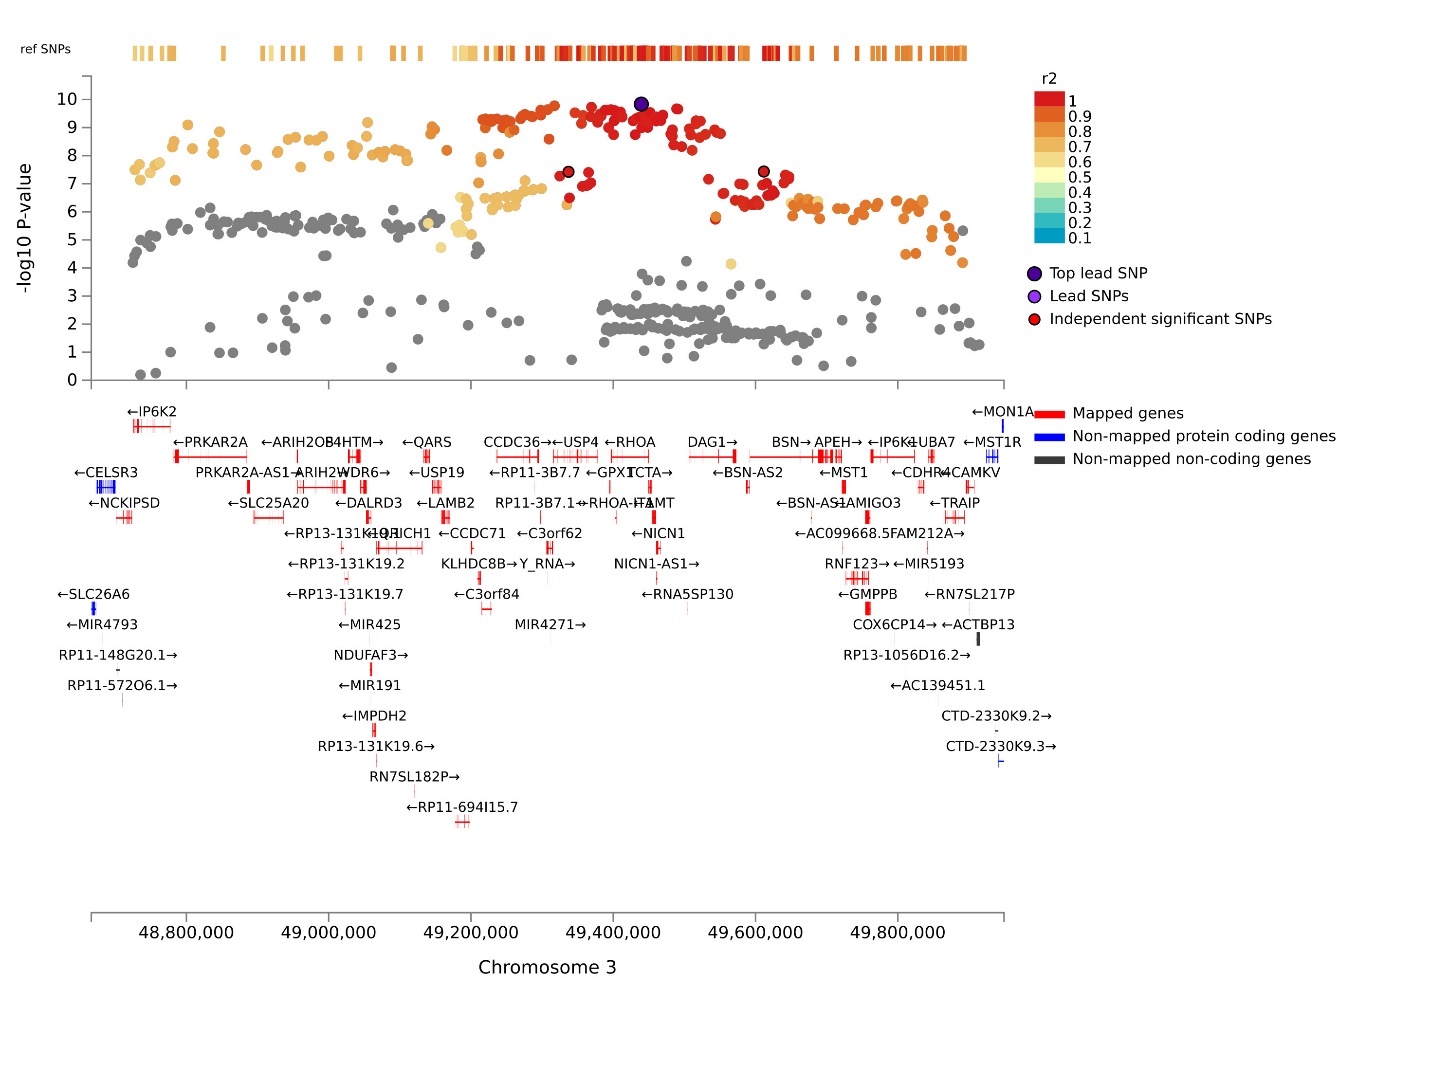


Locus 10 EA_LA:


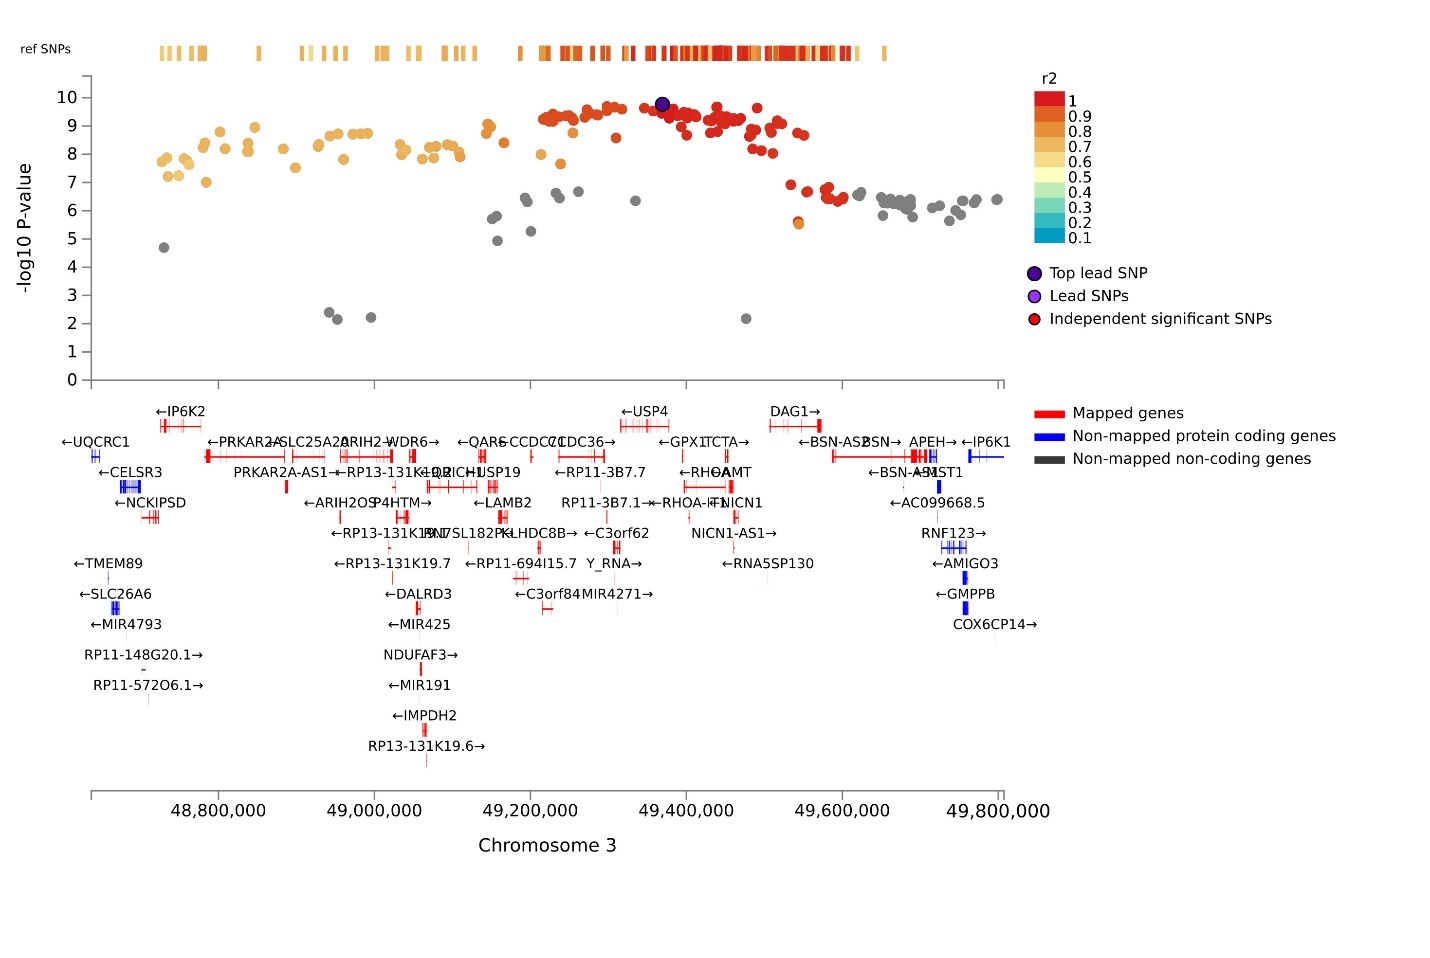


Locus 10 AA_EA_LA:


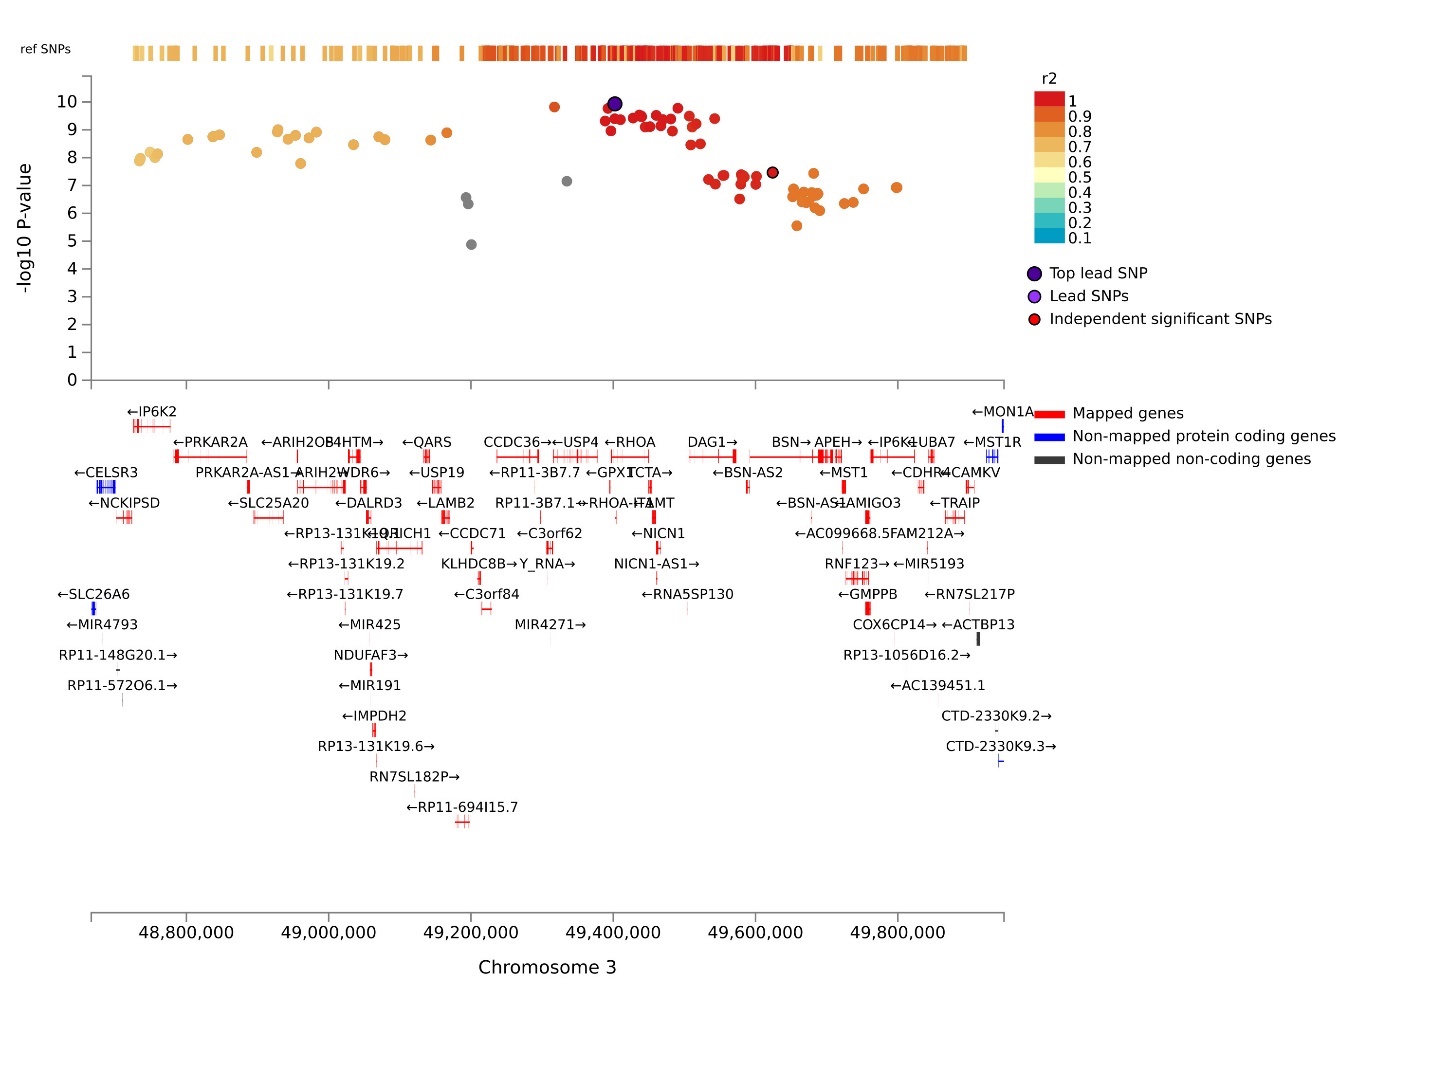


Locus 11 AA_EA:


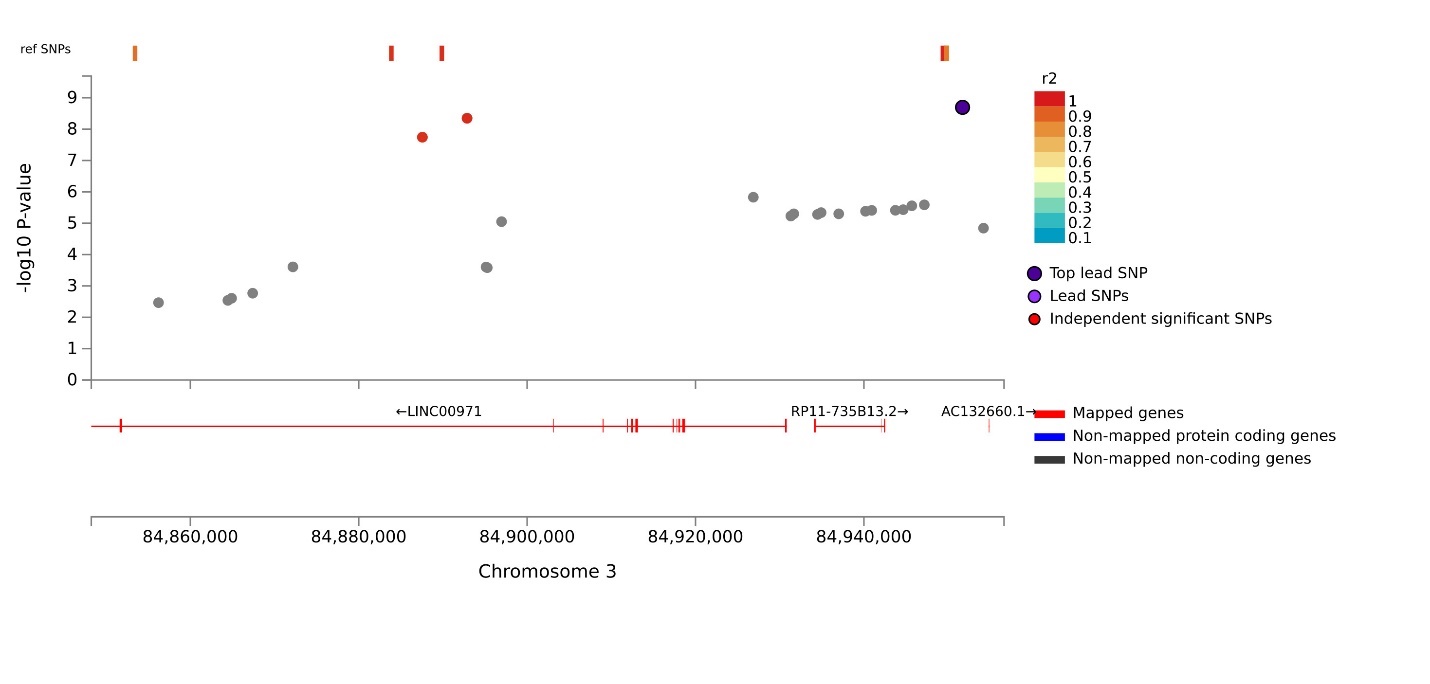


Locus 11 EA:


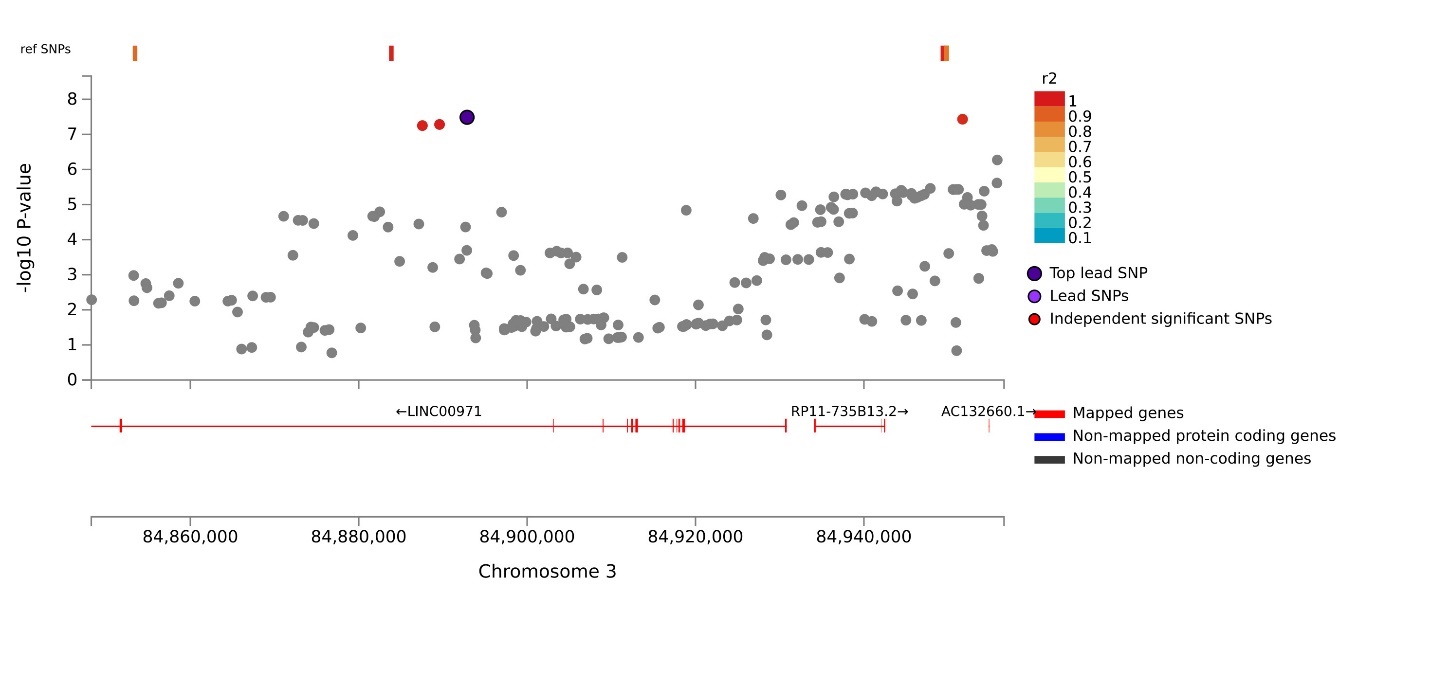


Locus 12 EA:


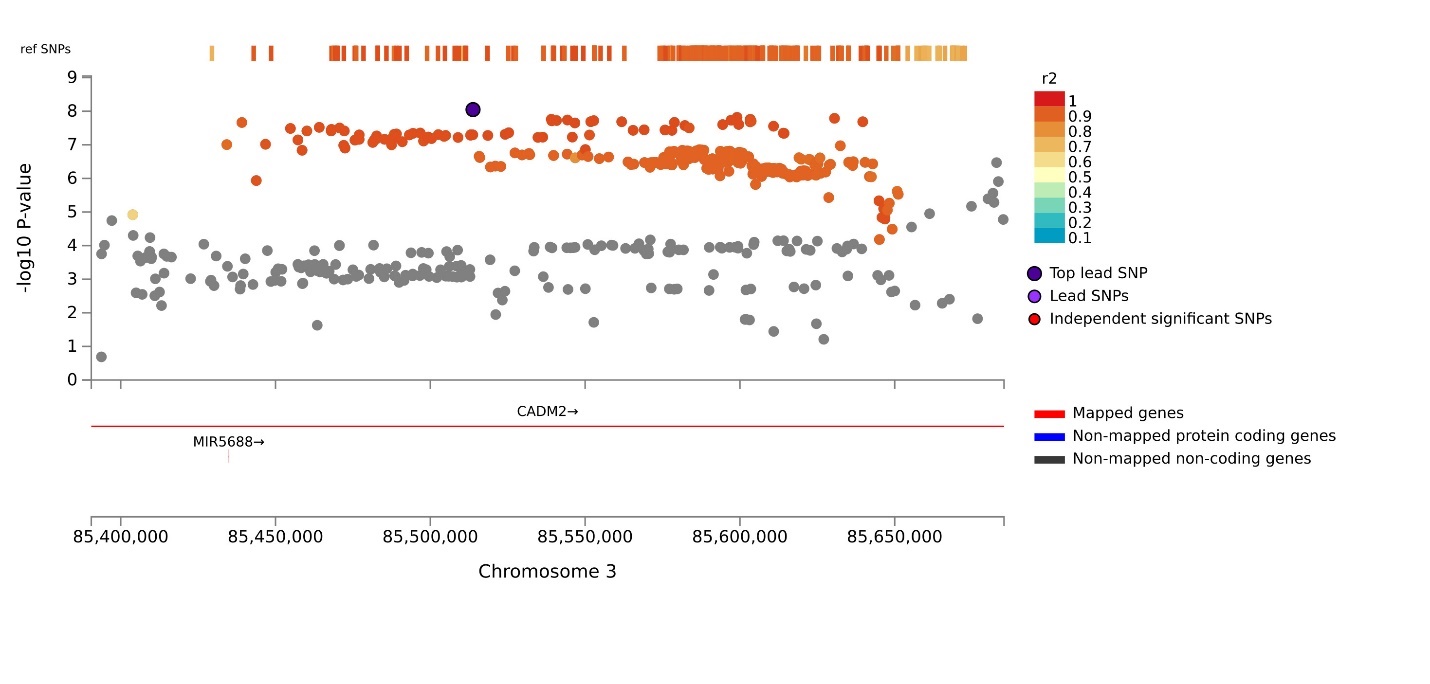


Locus 12 EA_LA:


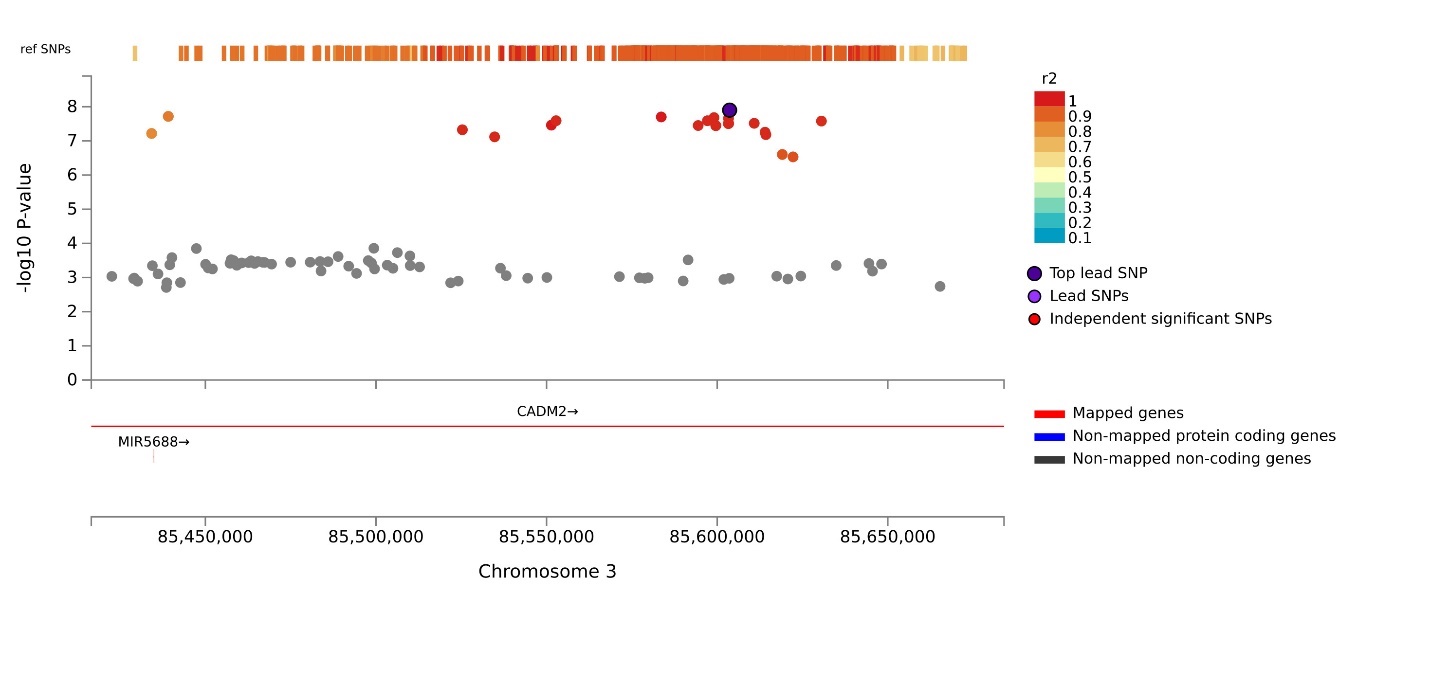


Locus 13 AA_EA_LA:


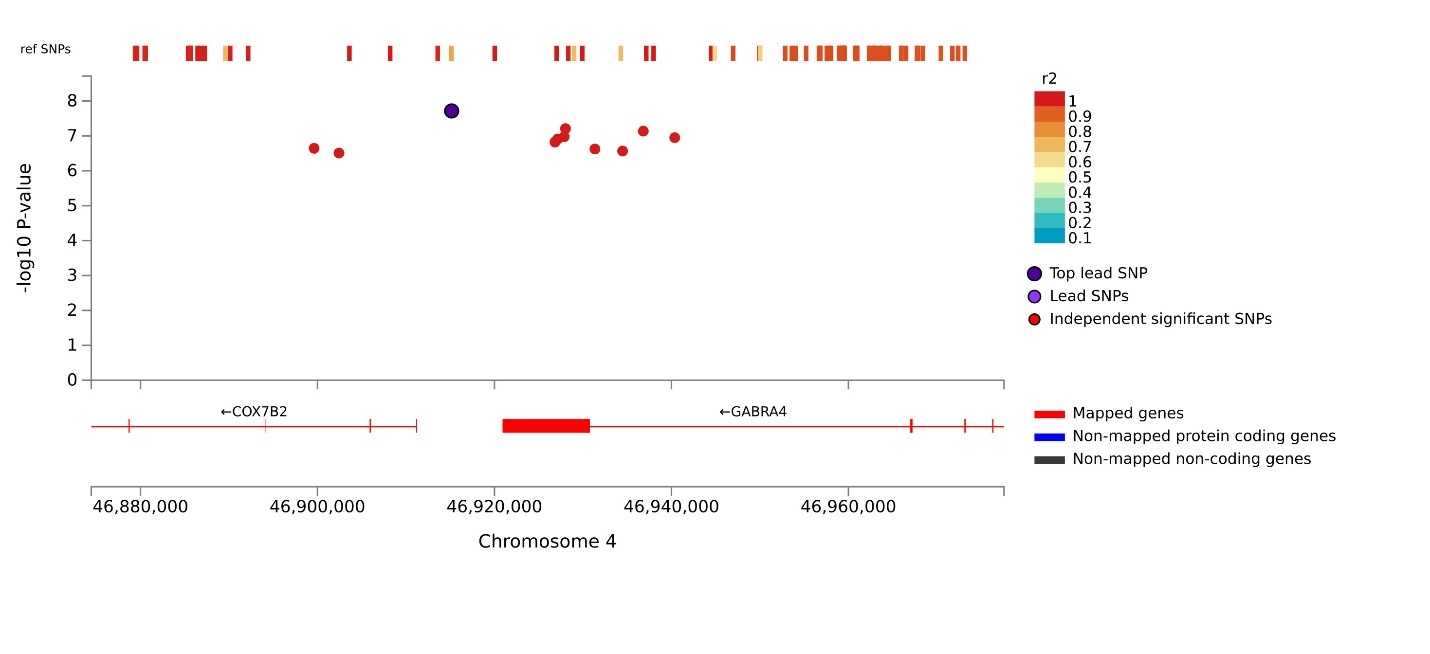


Locus 13 AA_EA:


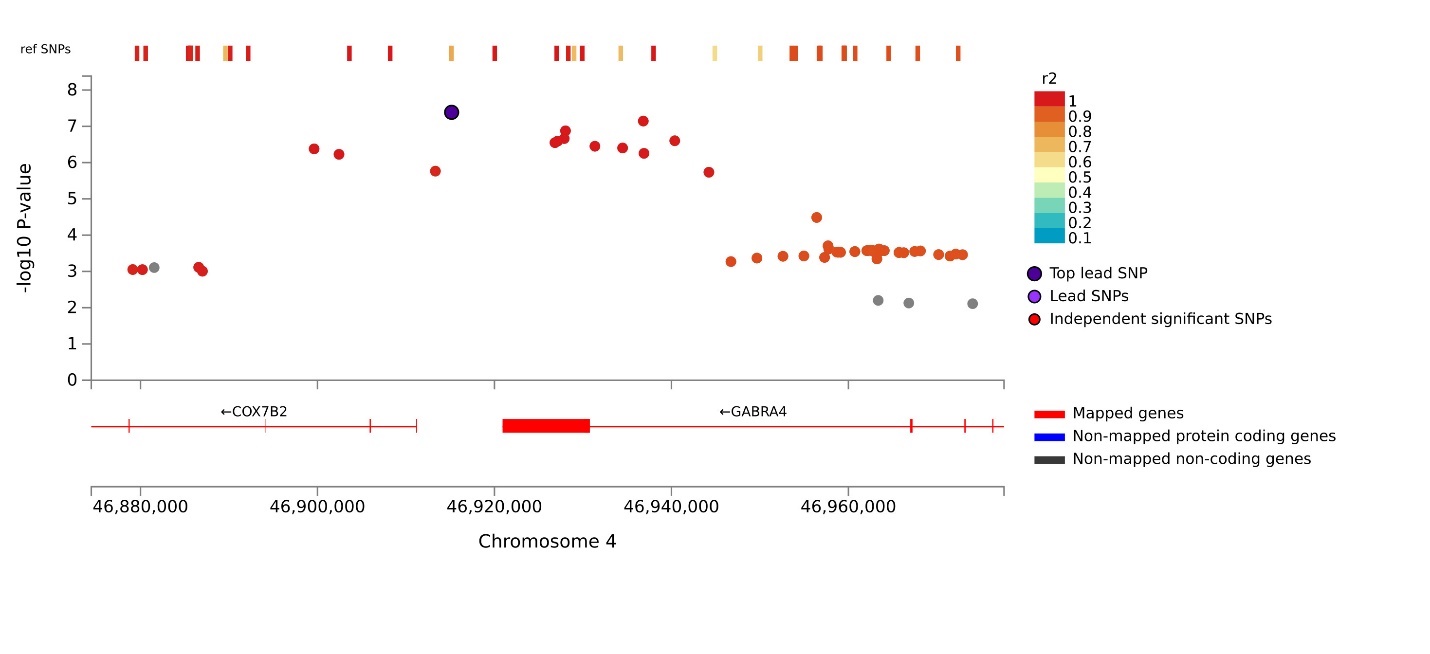


Locus 14 LA:


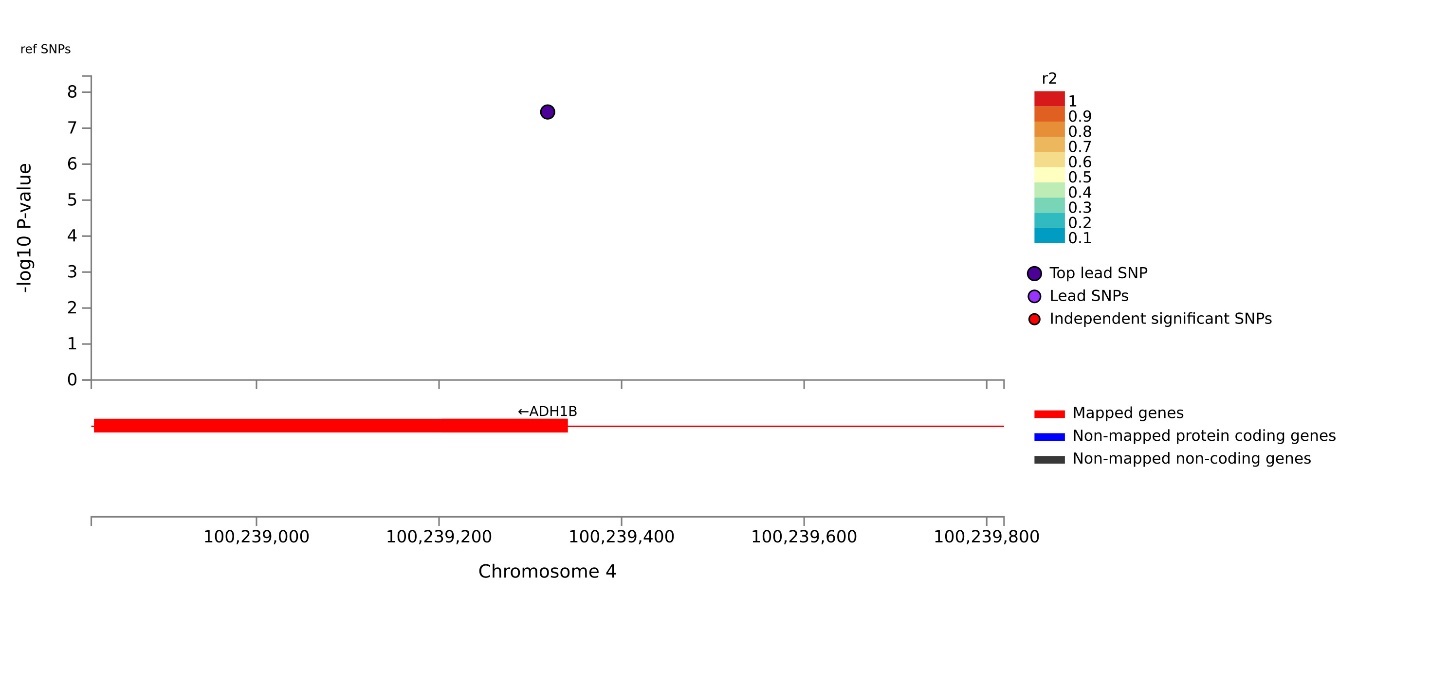


Locus 15 EA_LA:


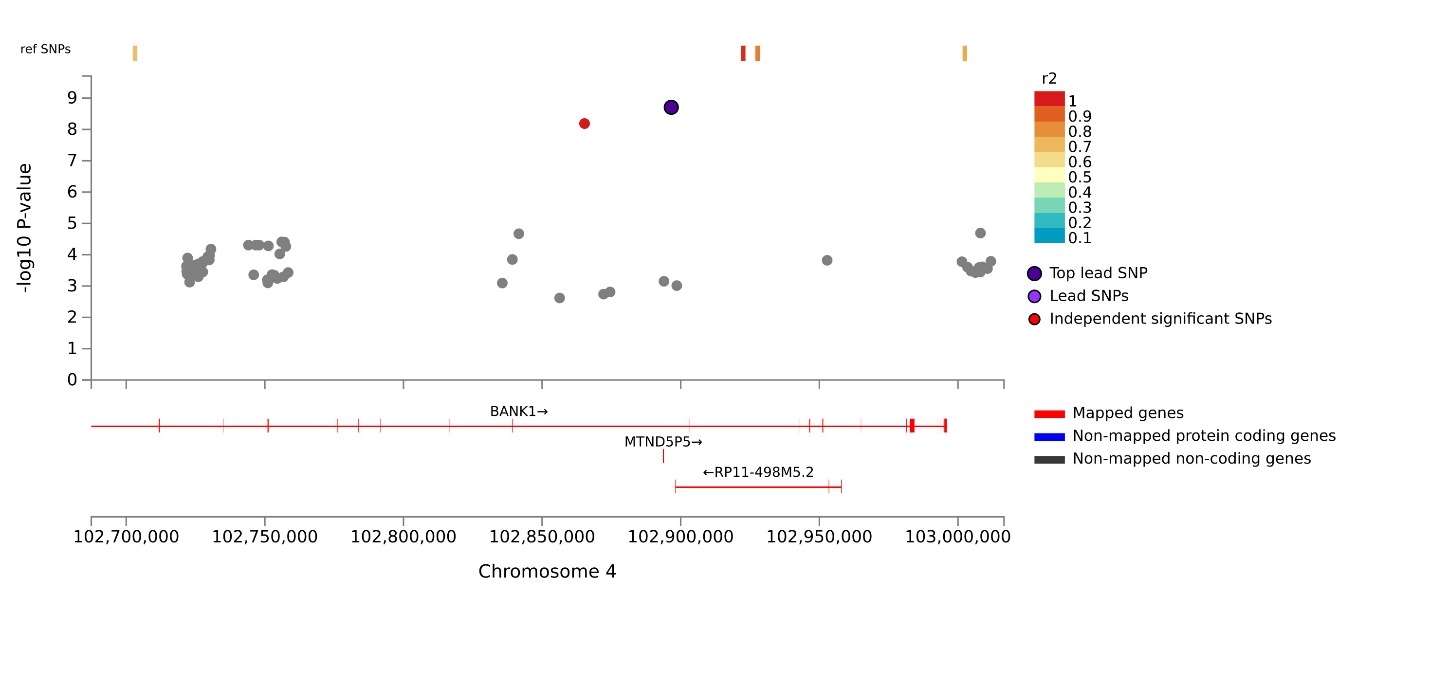


Locus 15 EA:


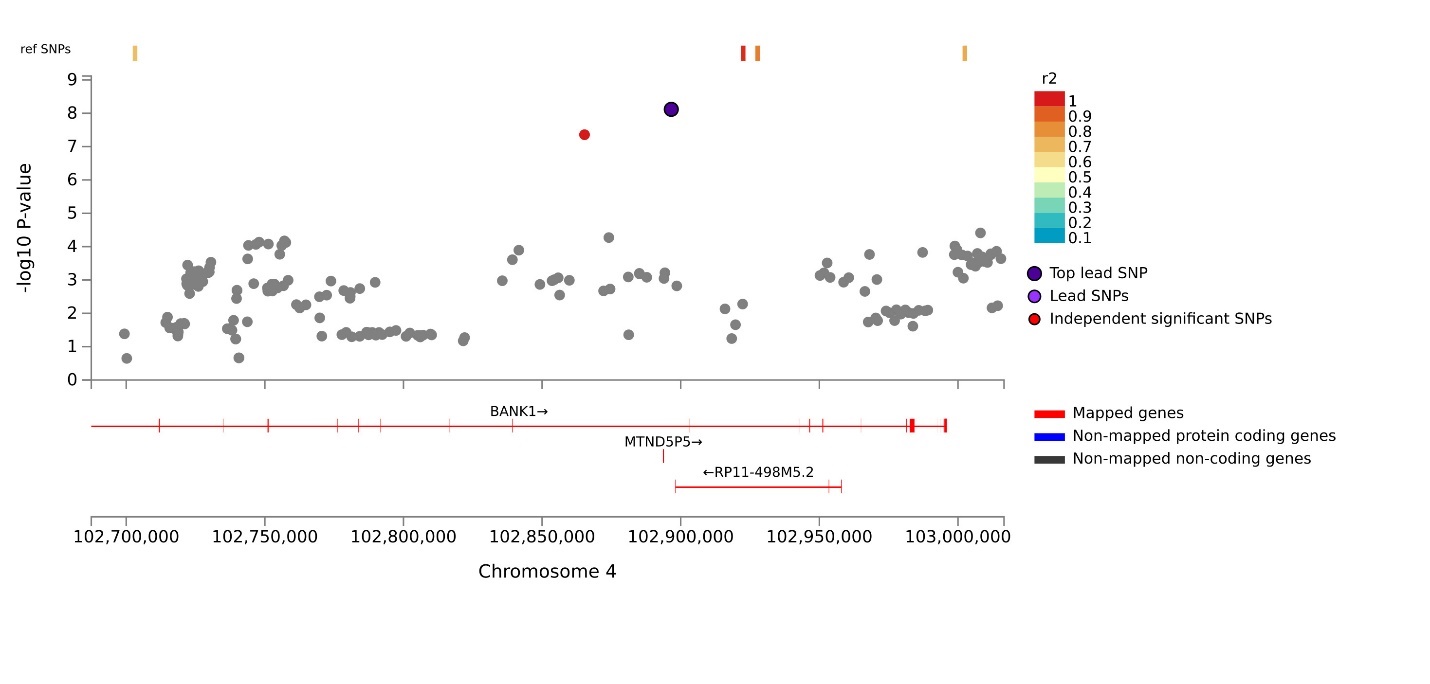


Locus 16 EA:


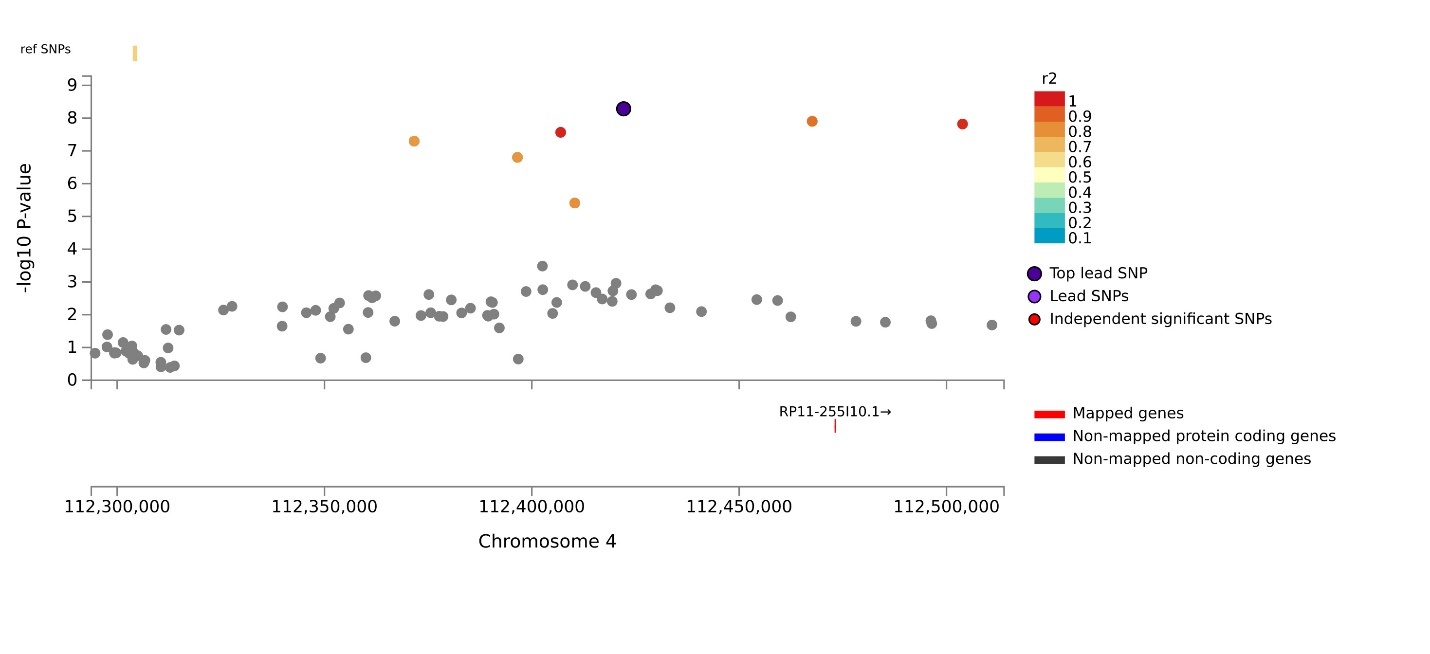


Locus 16 EA_LA:


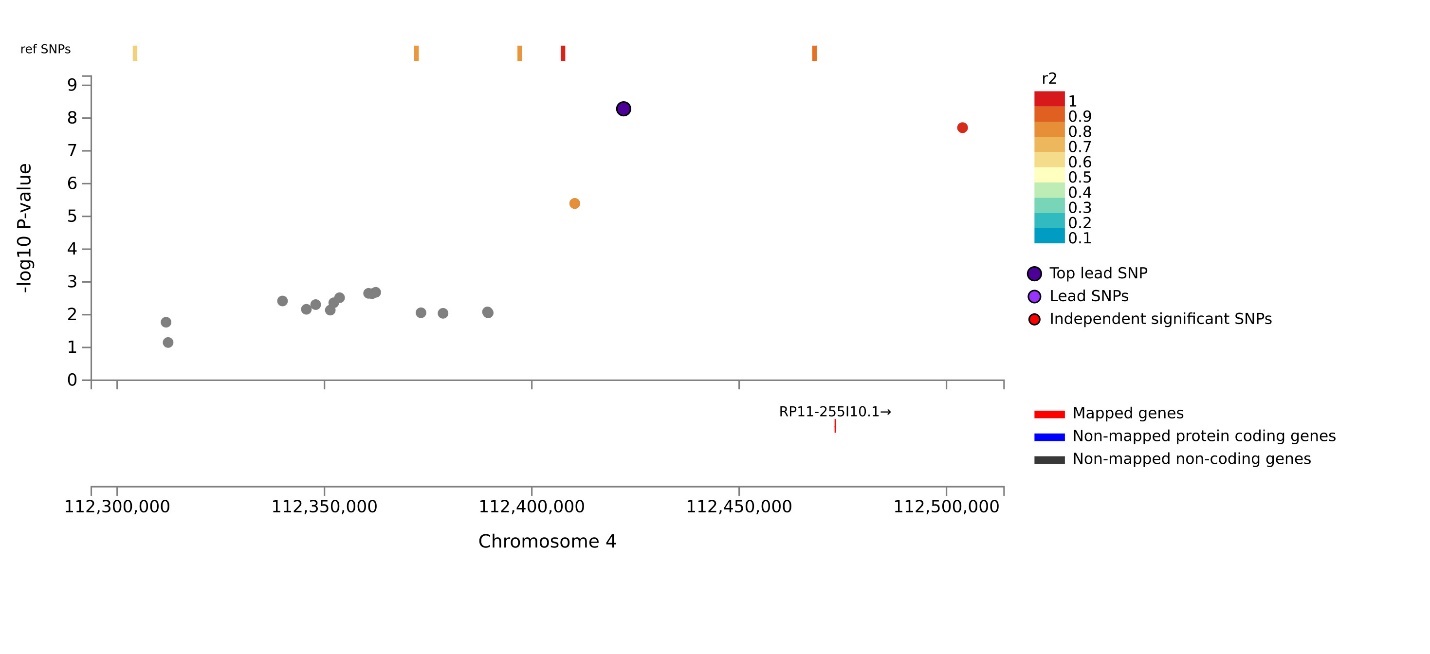


Locus 17 EA:


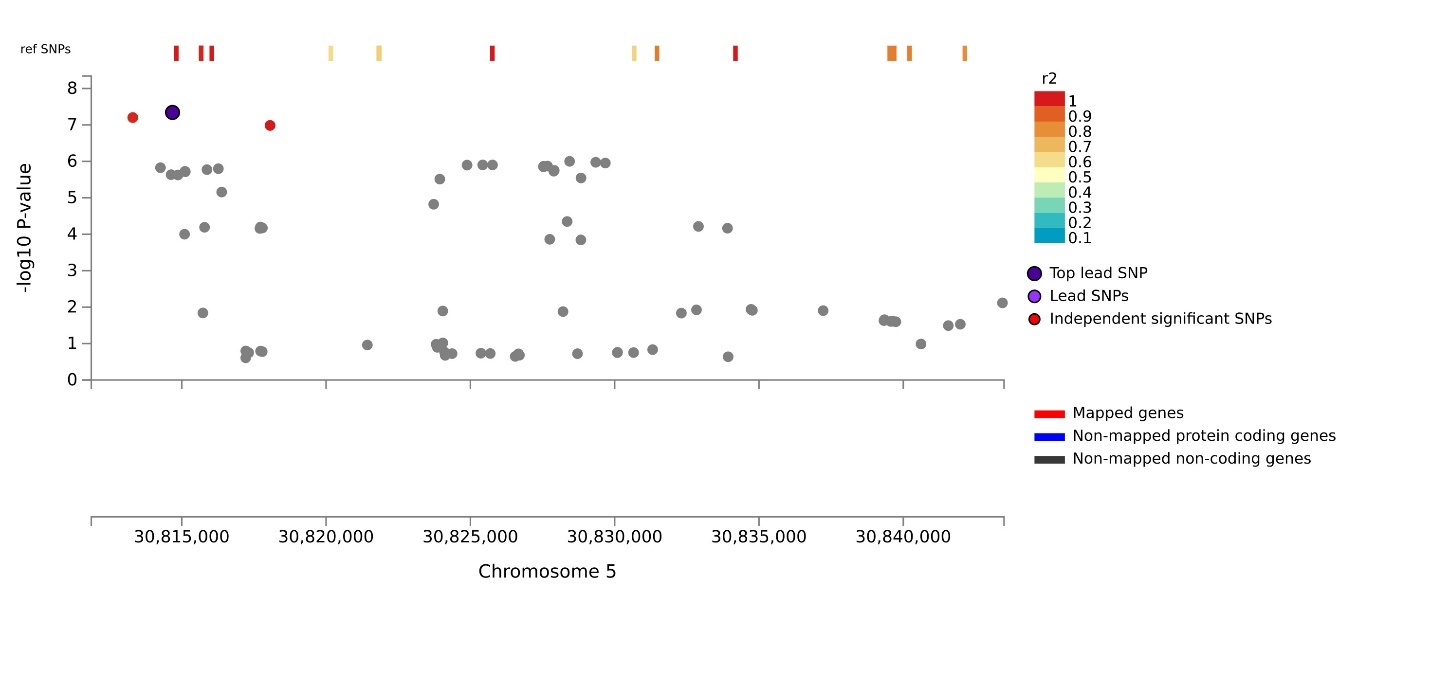


Locus 18 AA_EA:


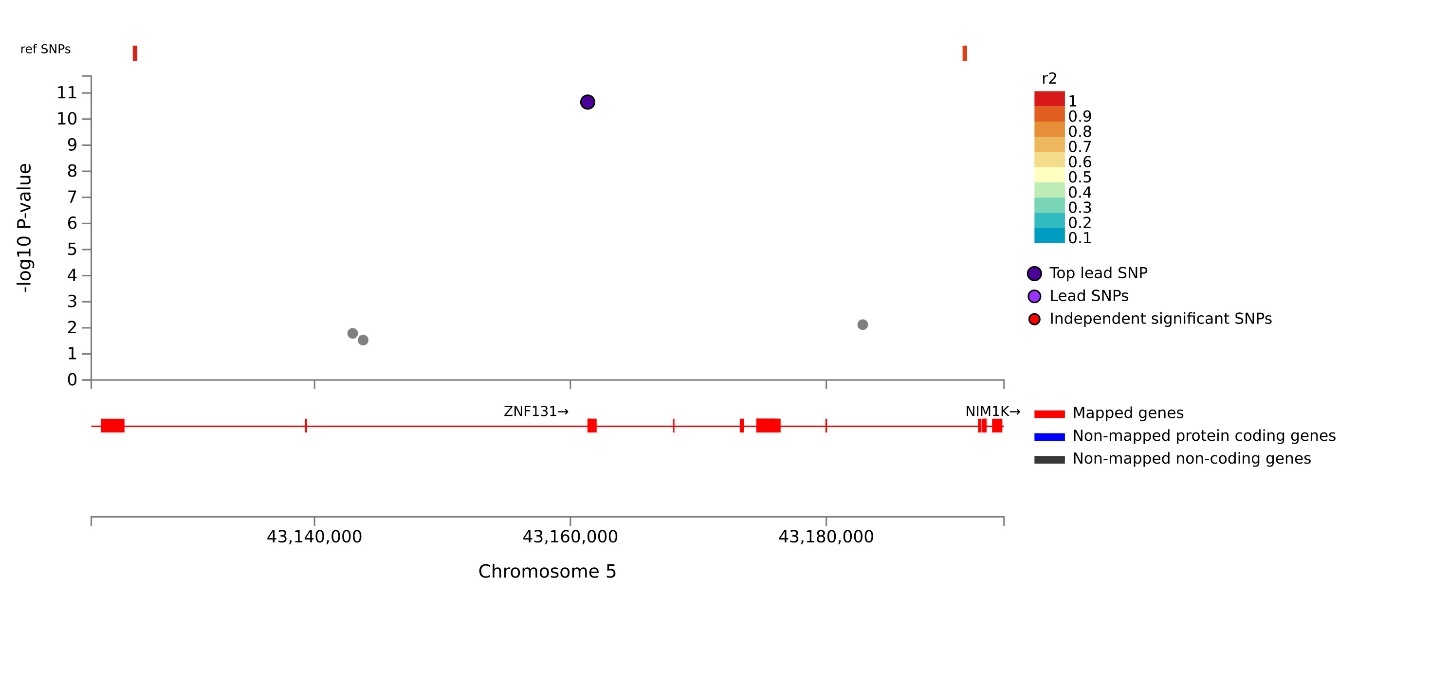


Locus 18 EA:


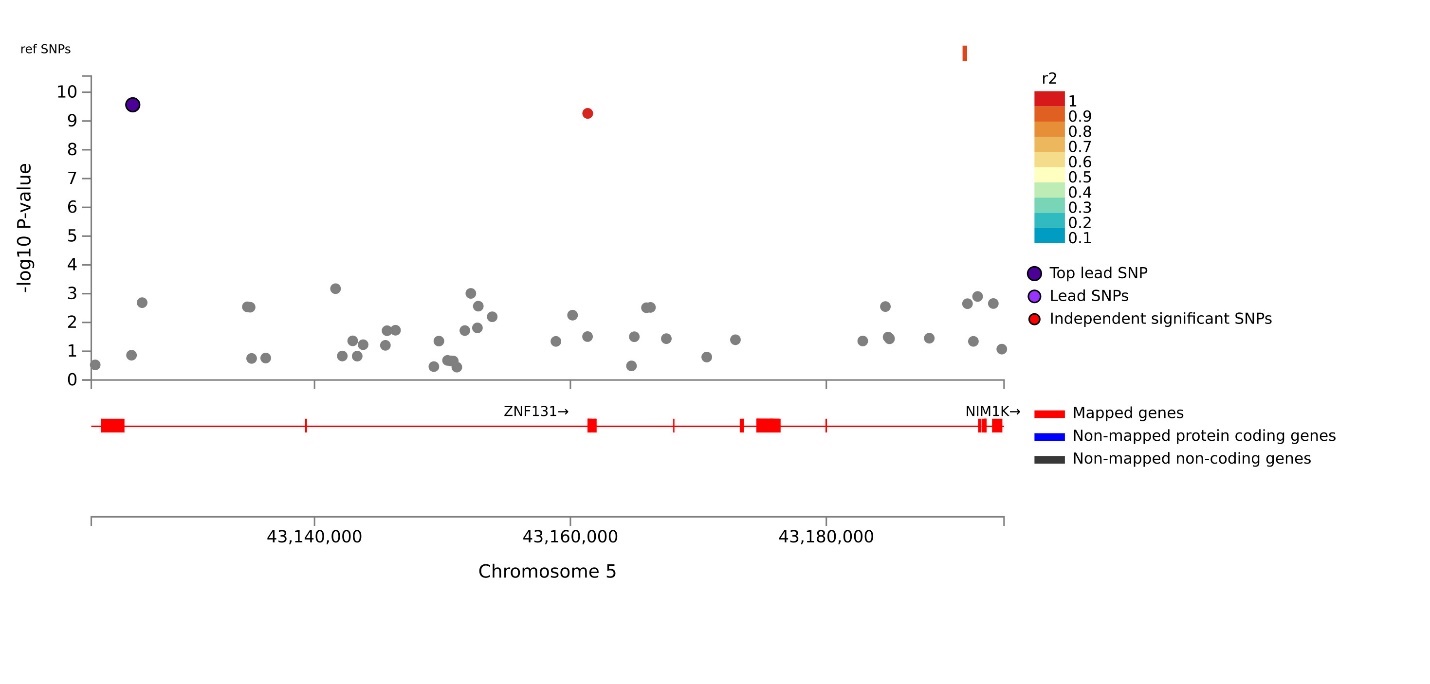


Locus 19 EA:


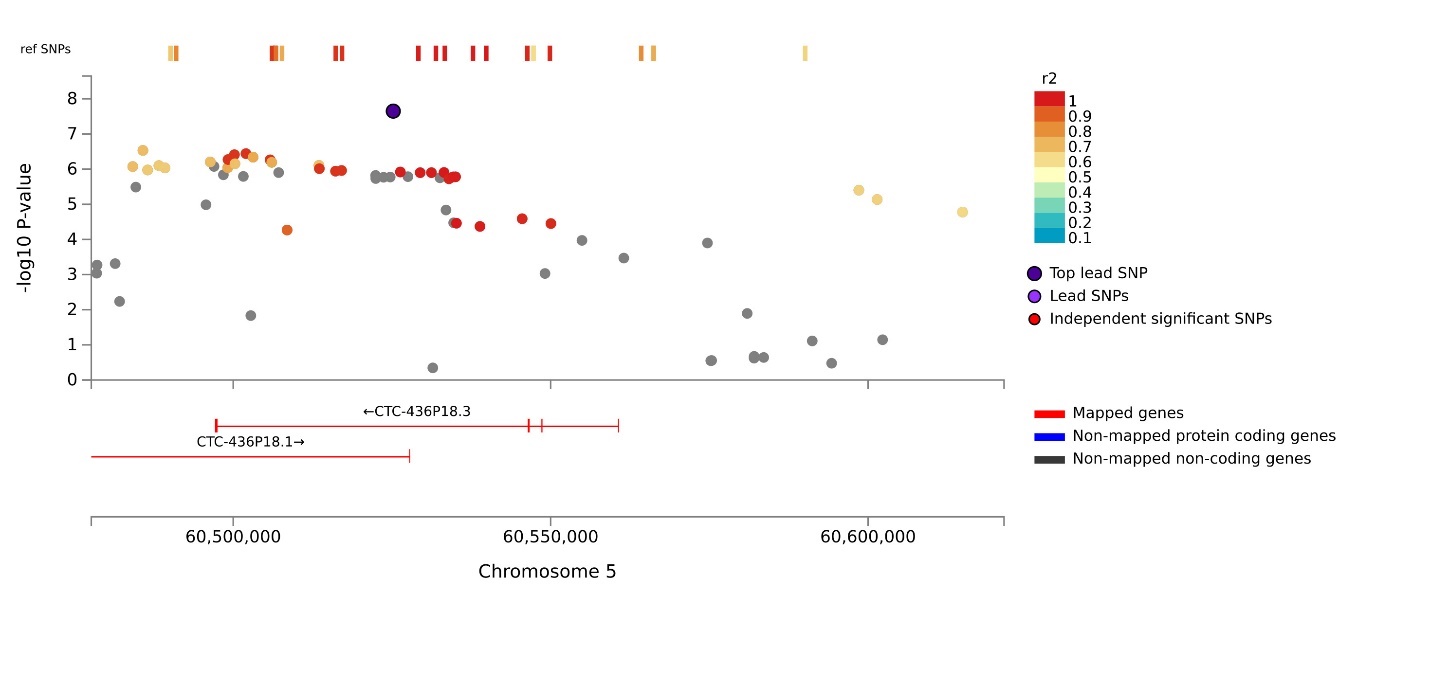


Locus 20 EA:


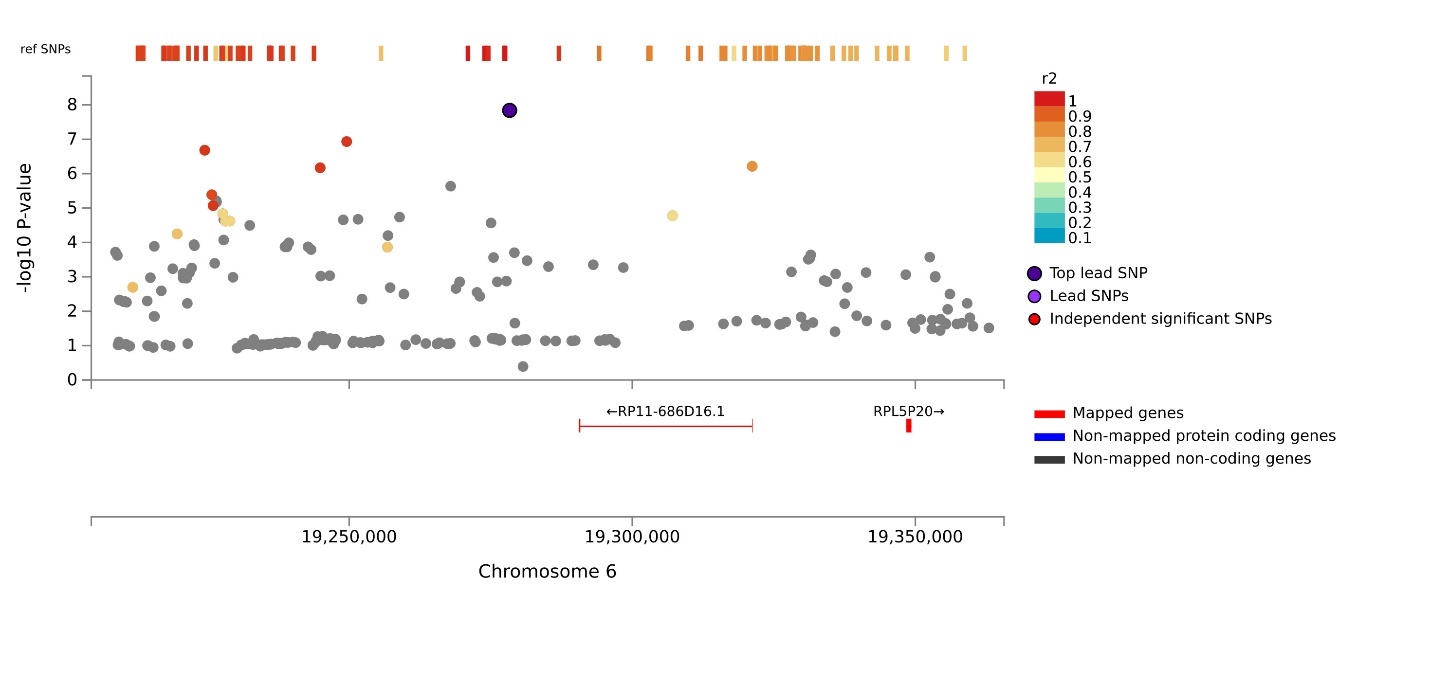


Locus 21 LA:


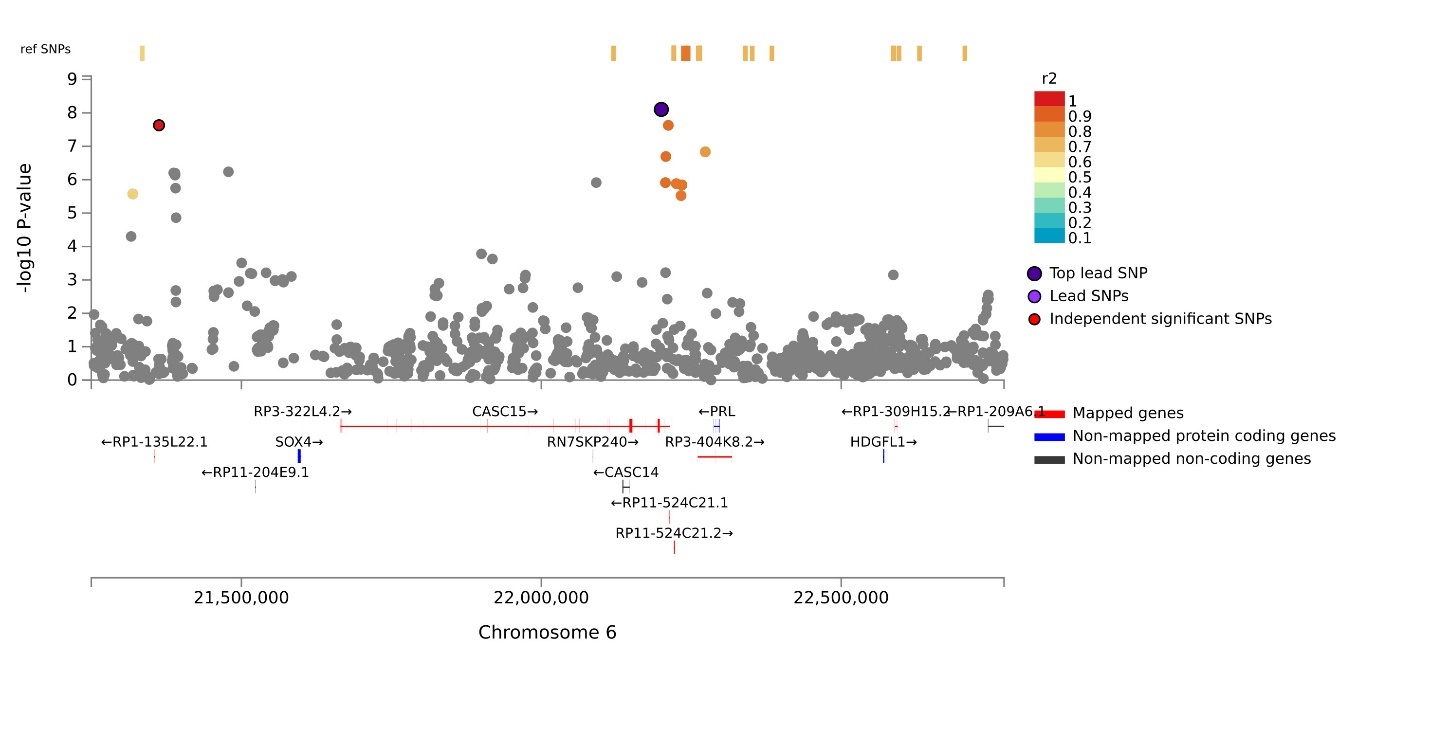


Locus 22 LA:


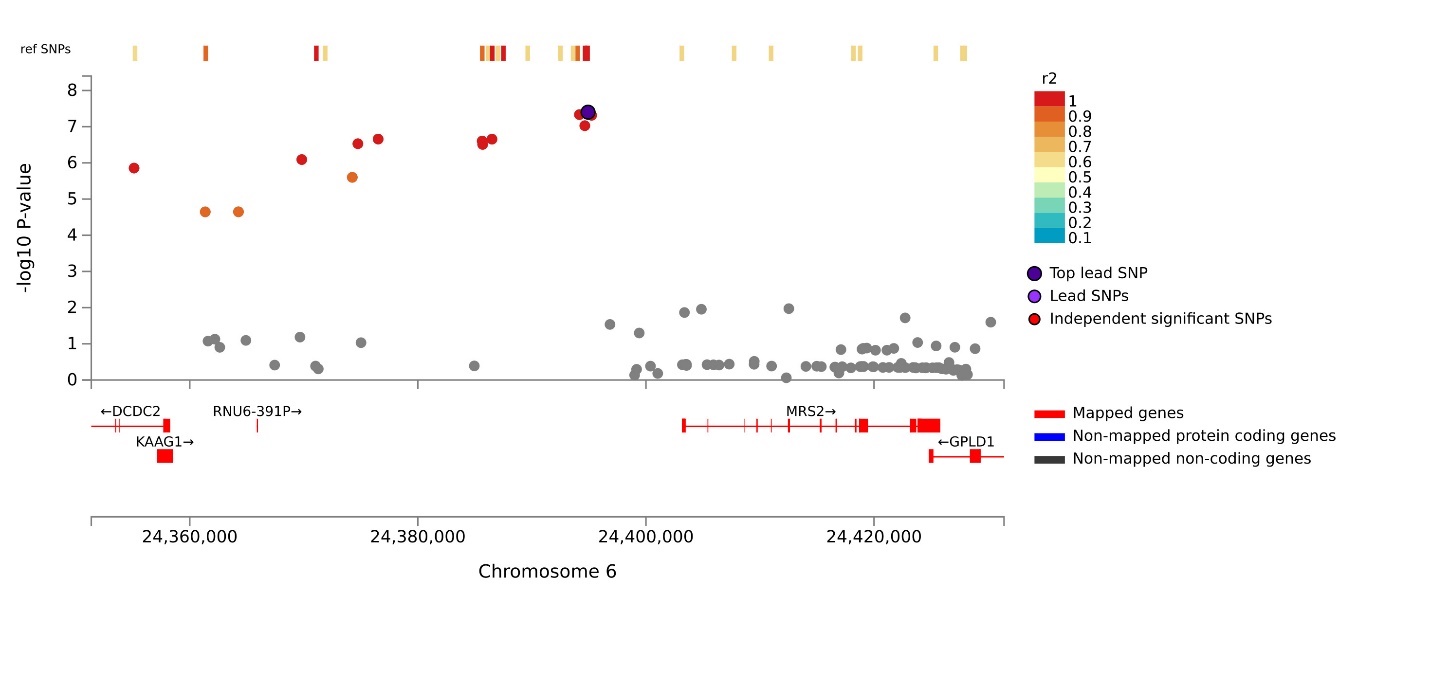


Locus 23 EA_LA:


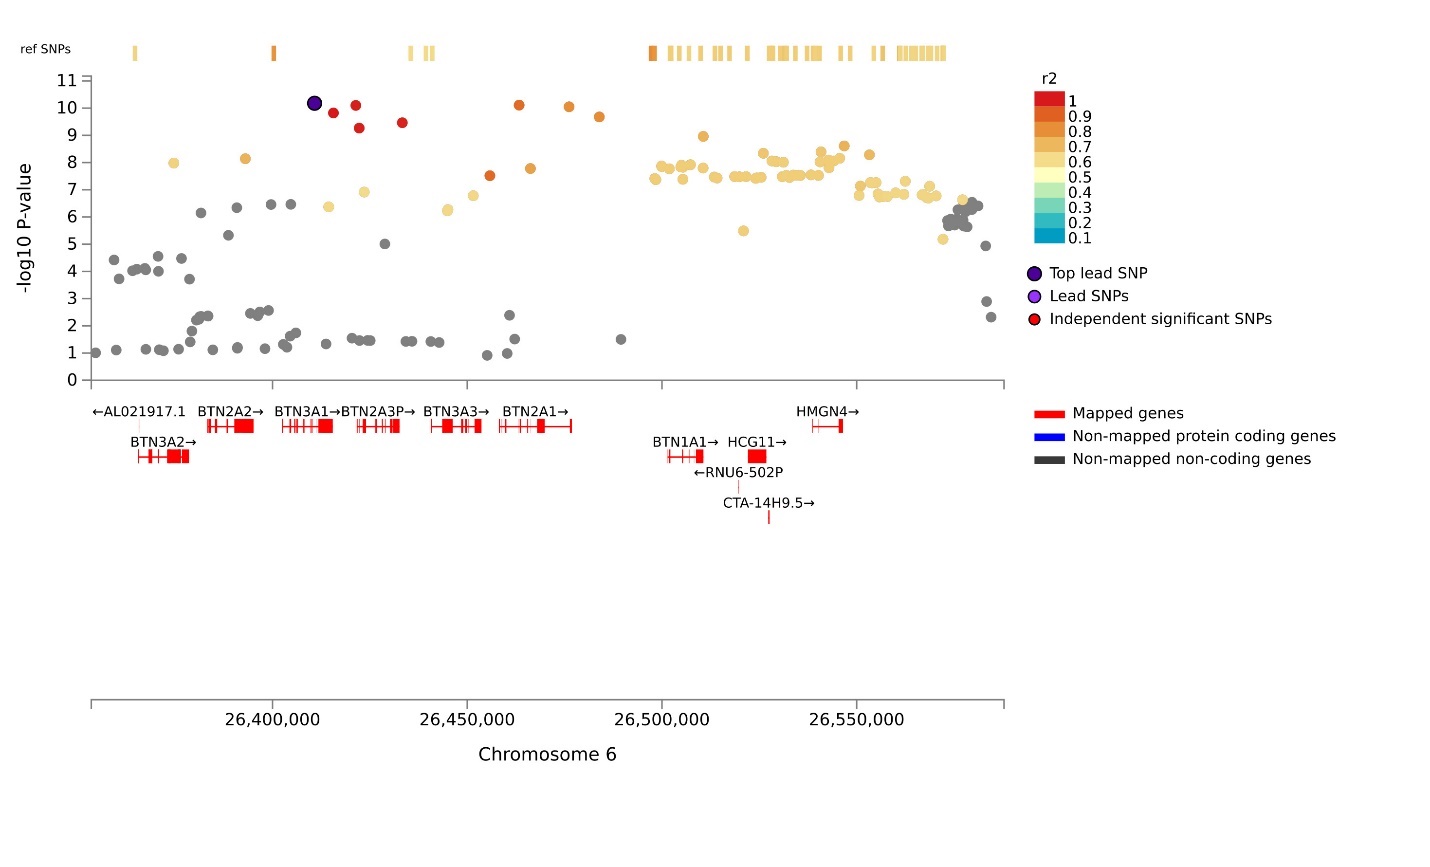


Locus 23 EA:


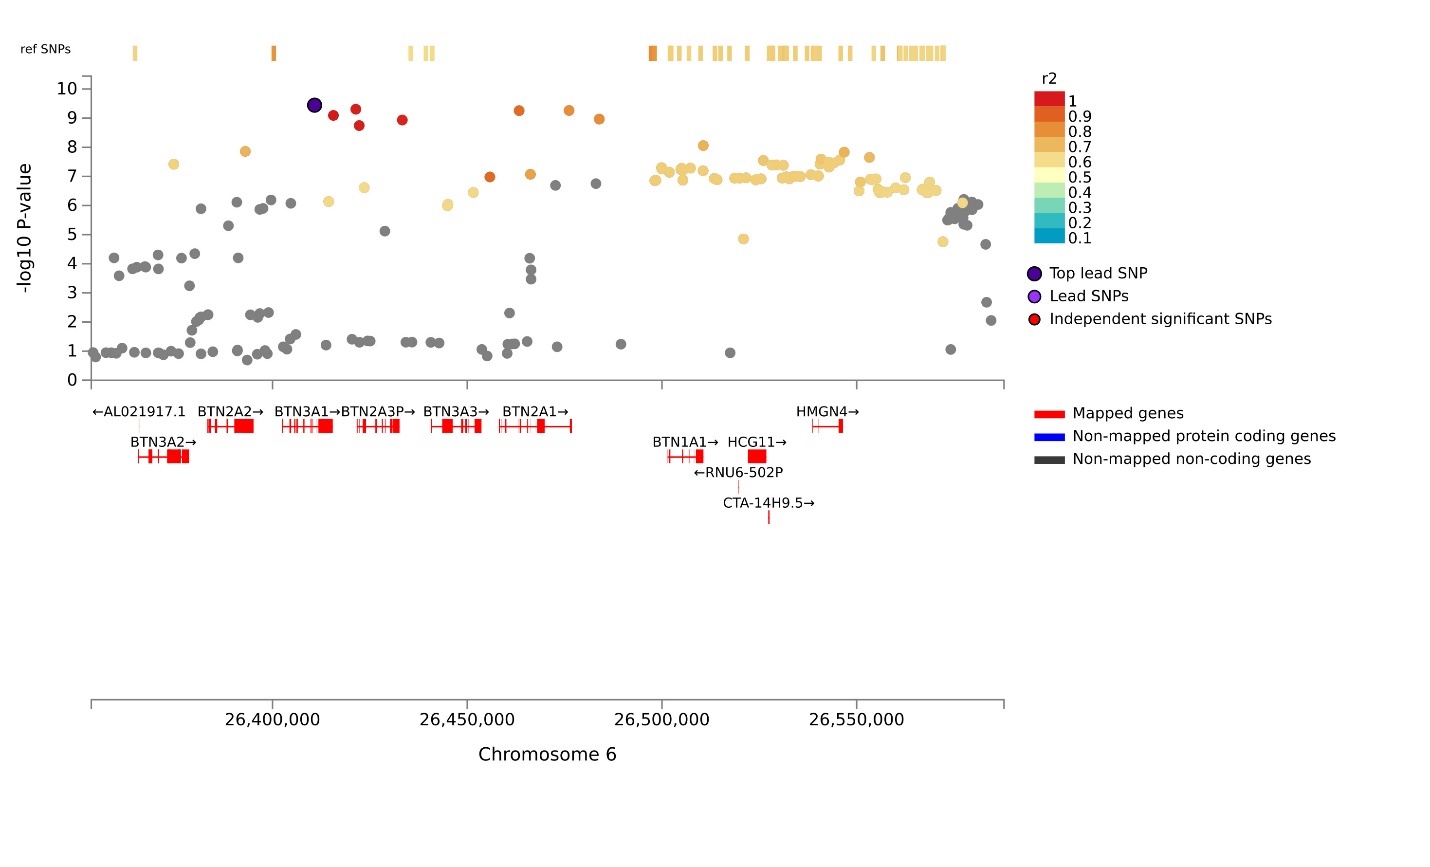


Locus 24 EA_LA:


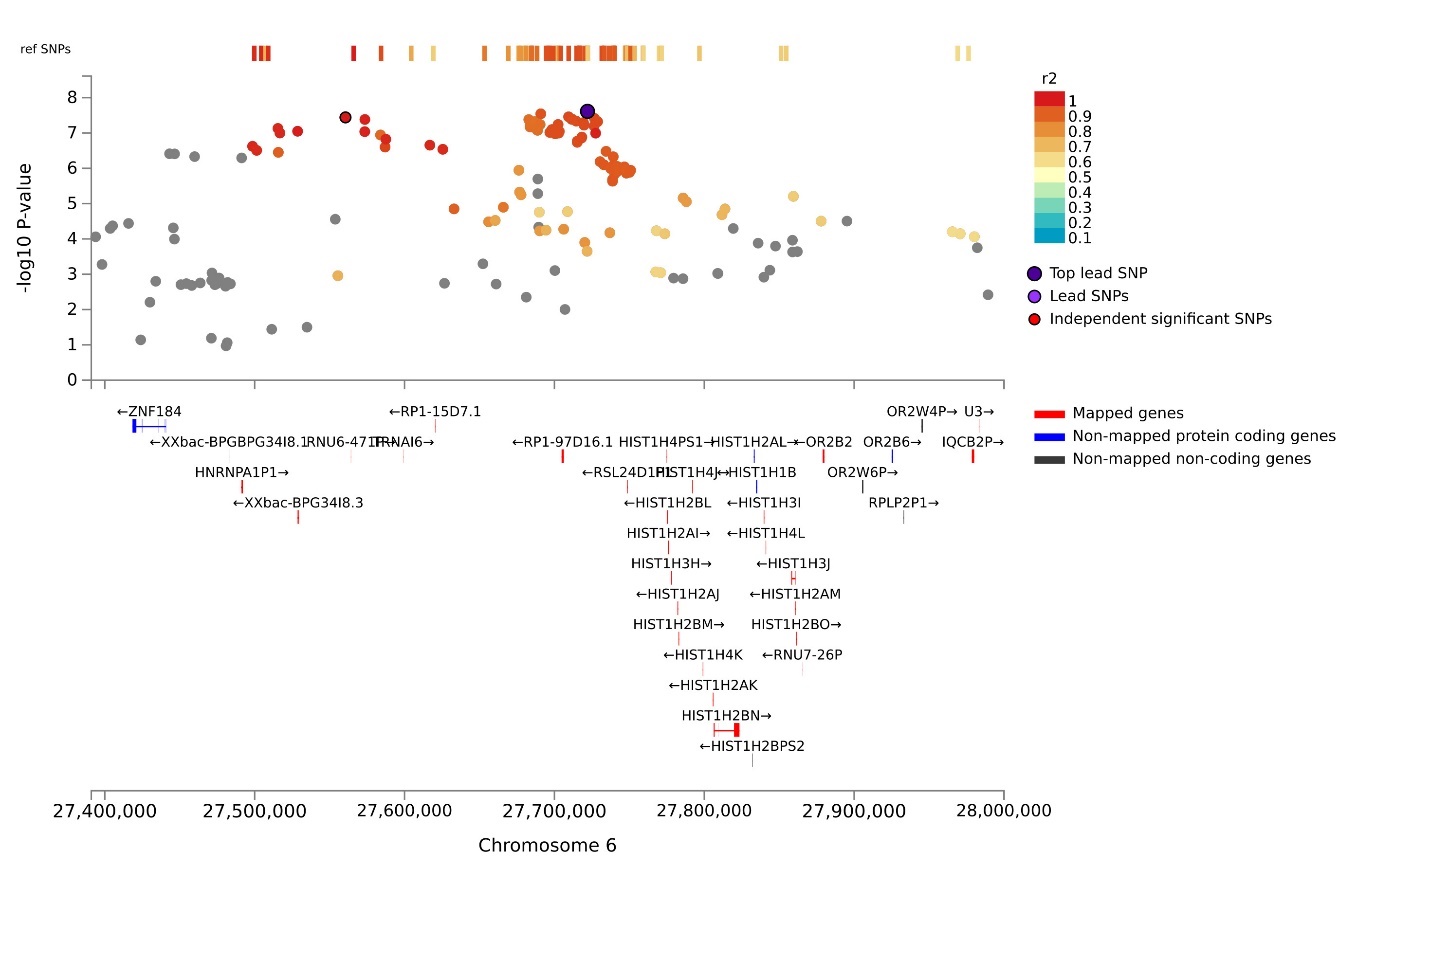


Locus 24 EA:


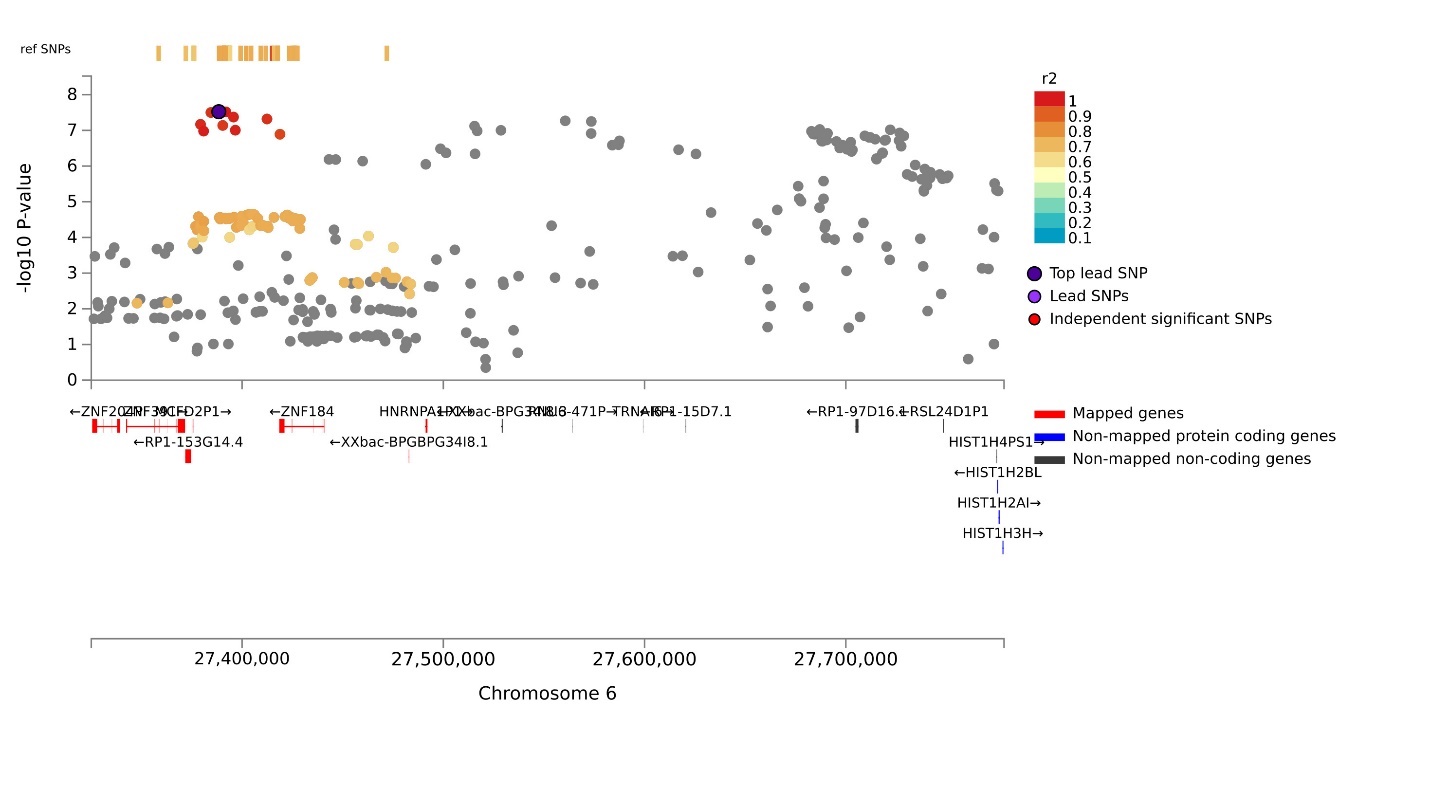


Locus 24 AA_EA:


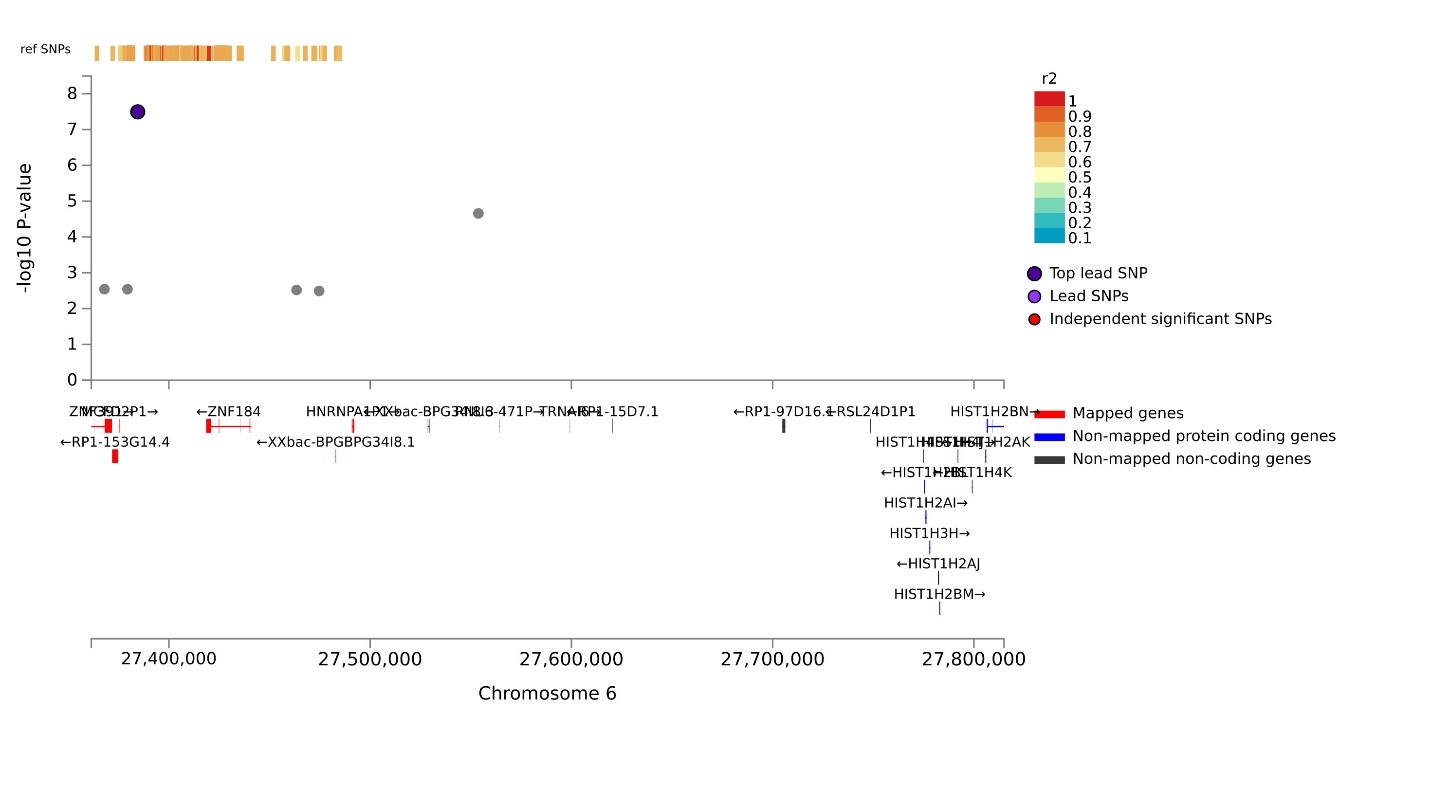


Locus 25 EA:


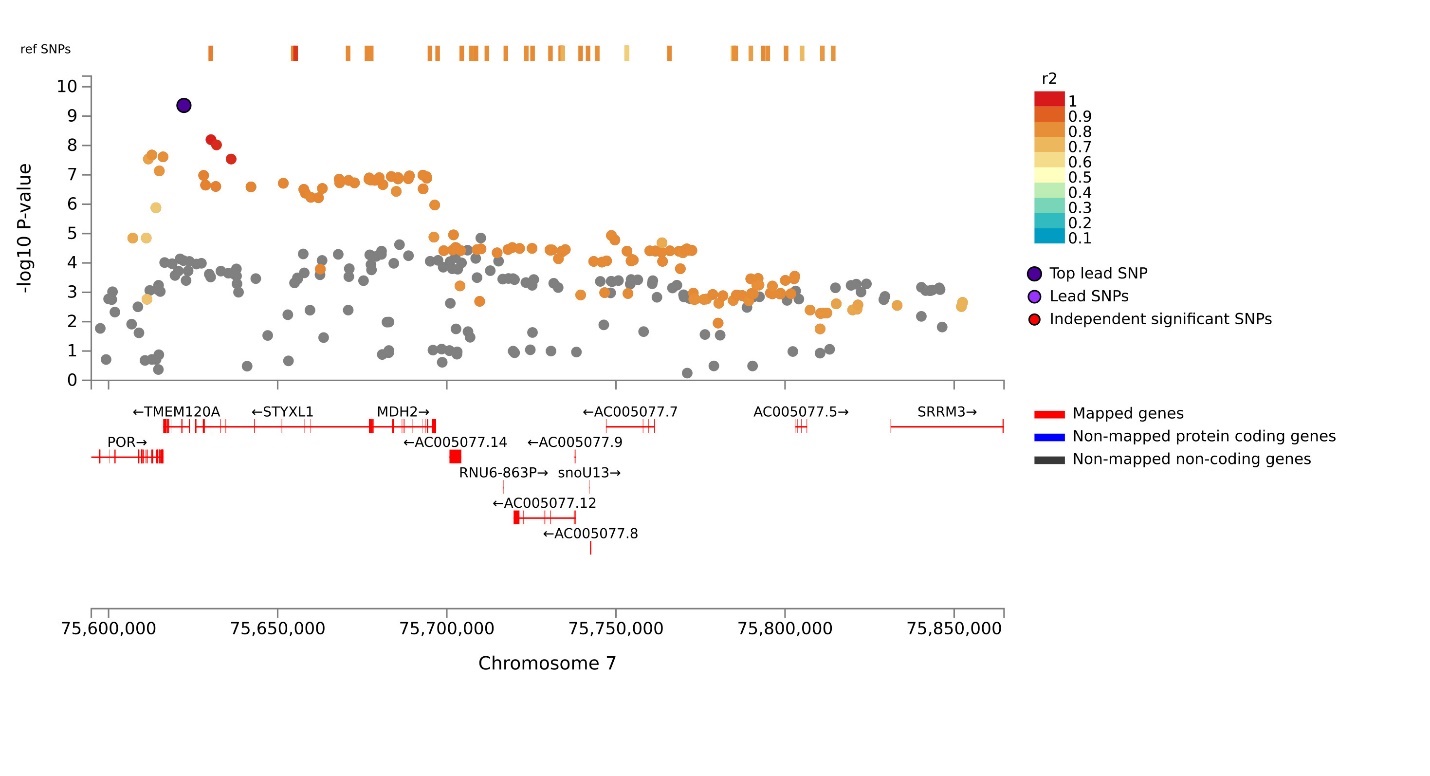


Locus 25 AA_EA:


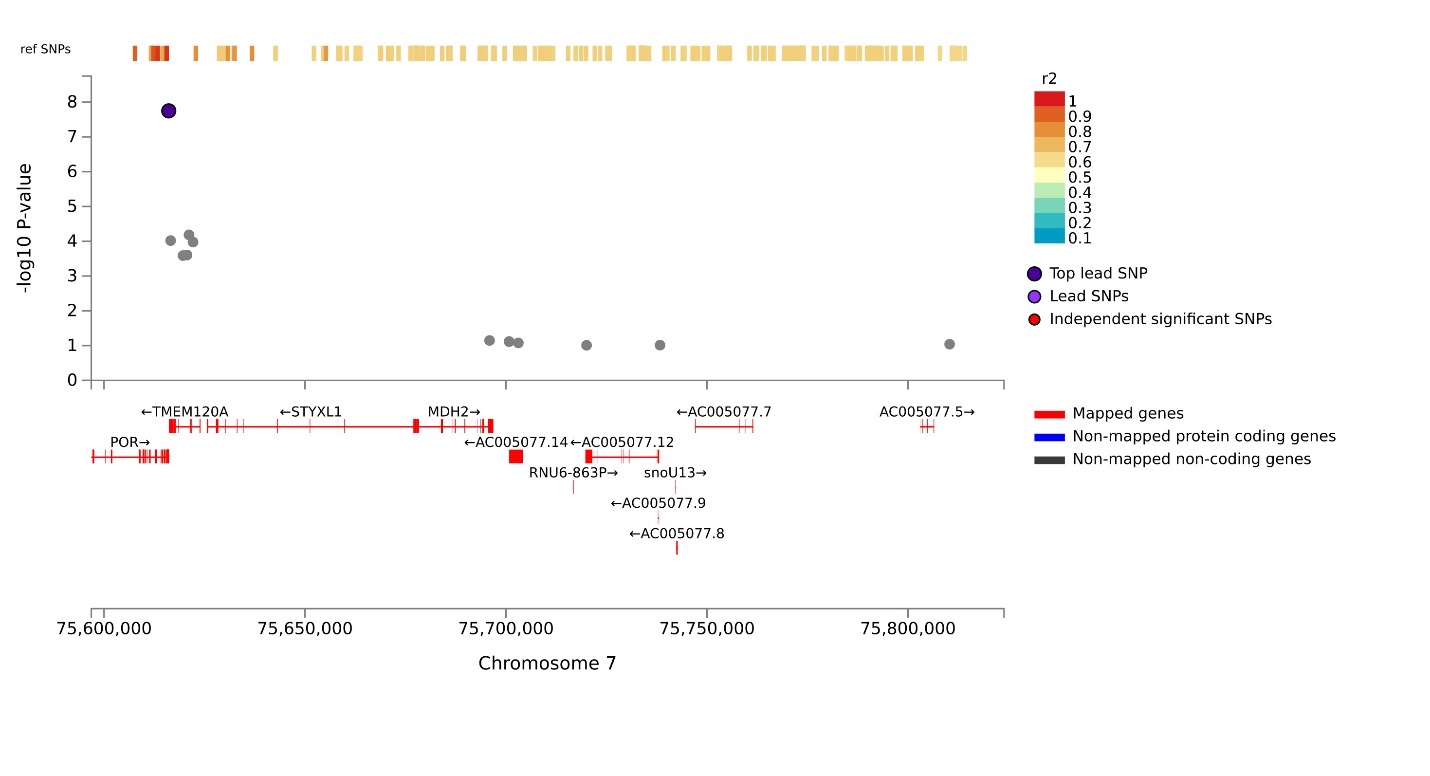


Locus 25 EA_LA:


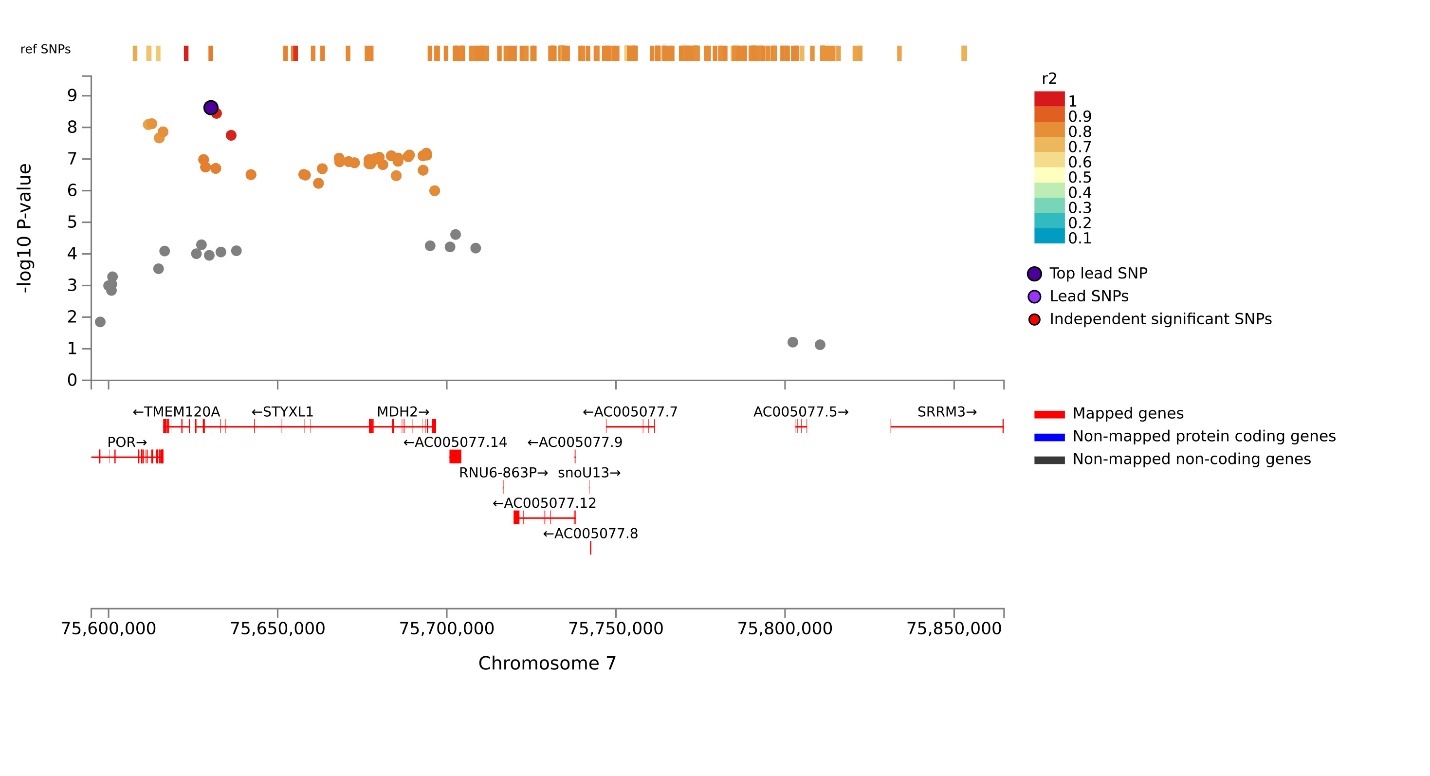


Locus 25 AA_EA_LA:


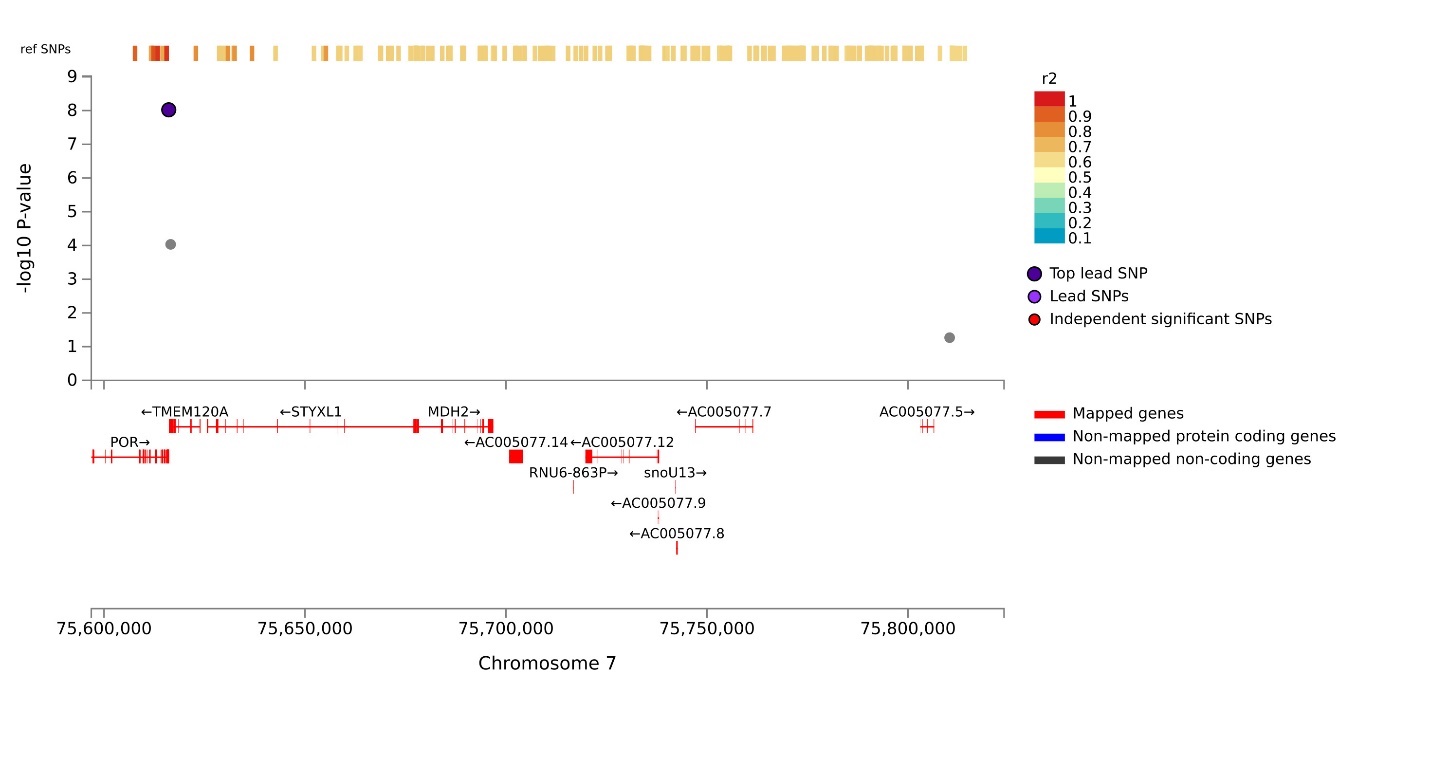


Locus 26 EA:


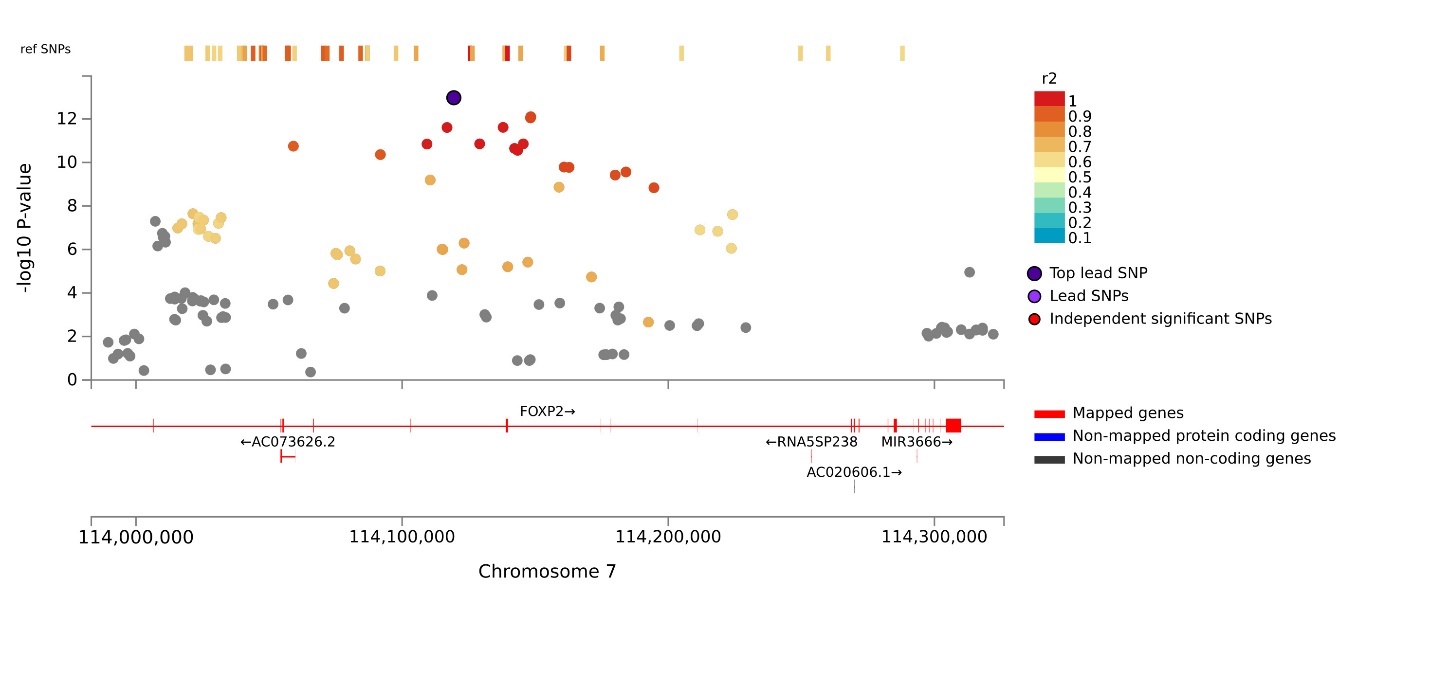


Locus 26 AA_EA:


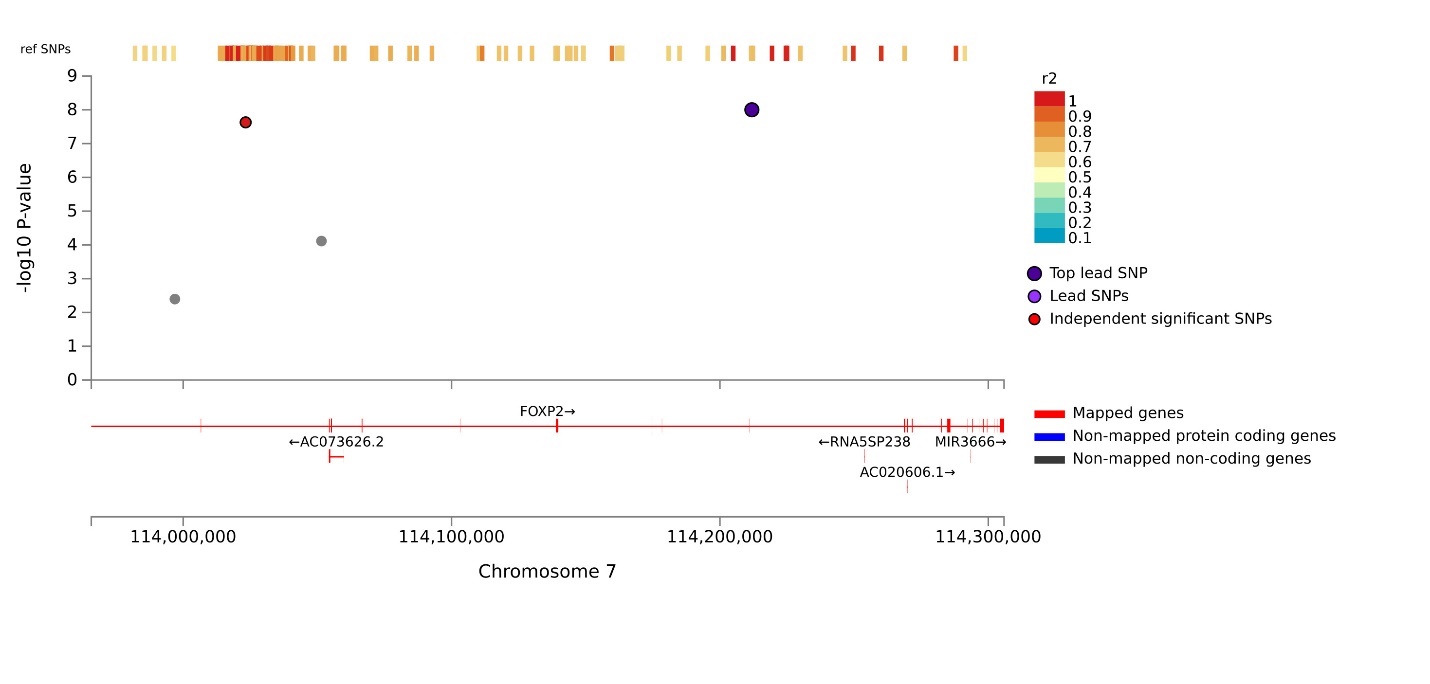


Locus 26 EA_LA:


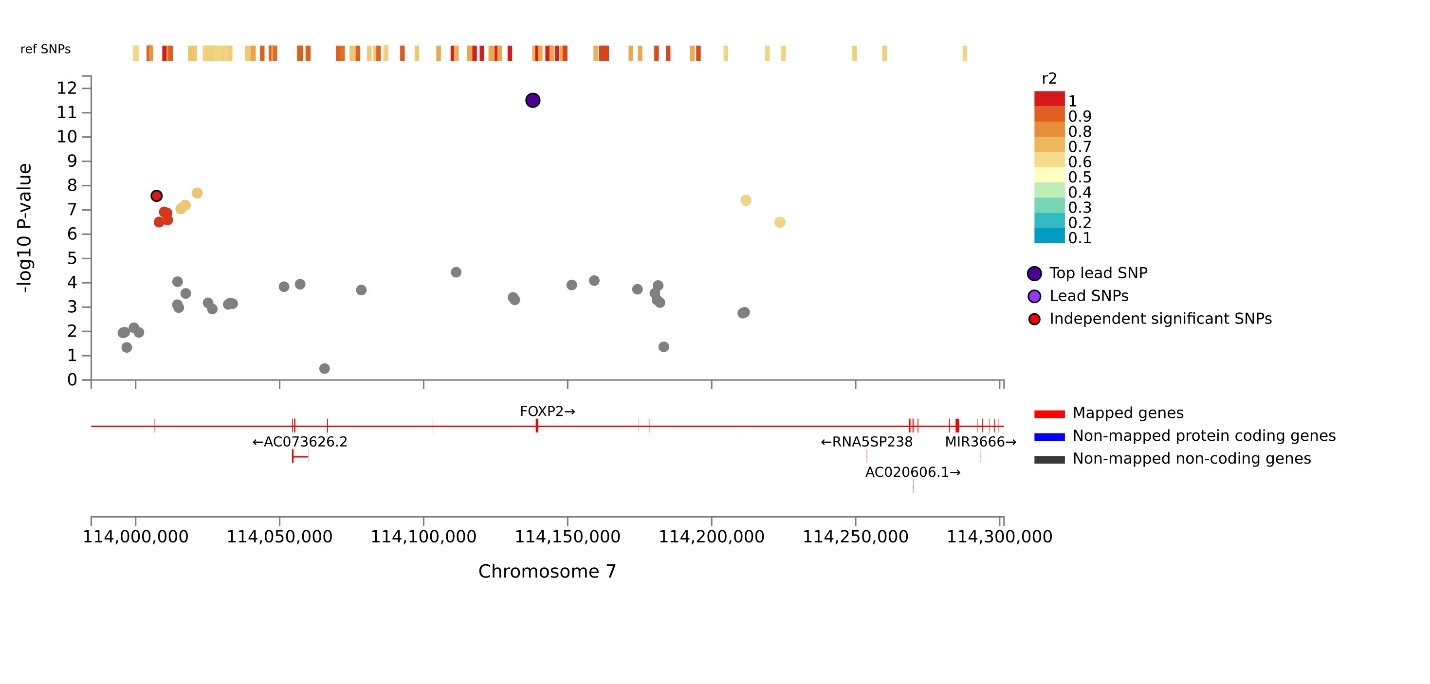


Locus 26 AA_EA_LA:


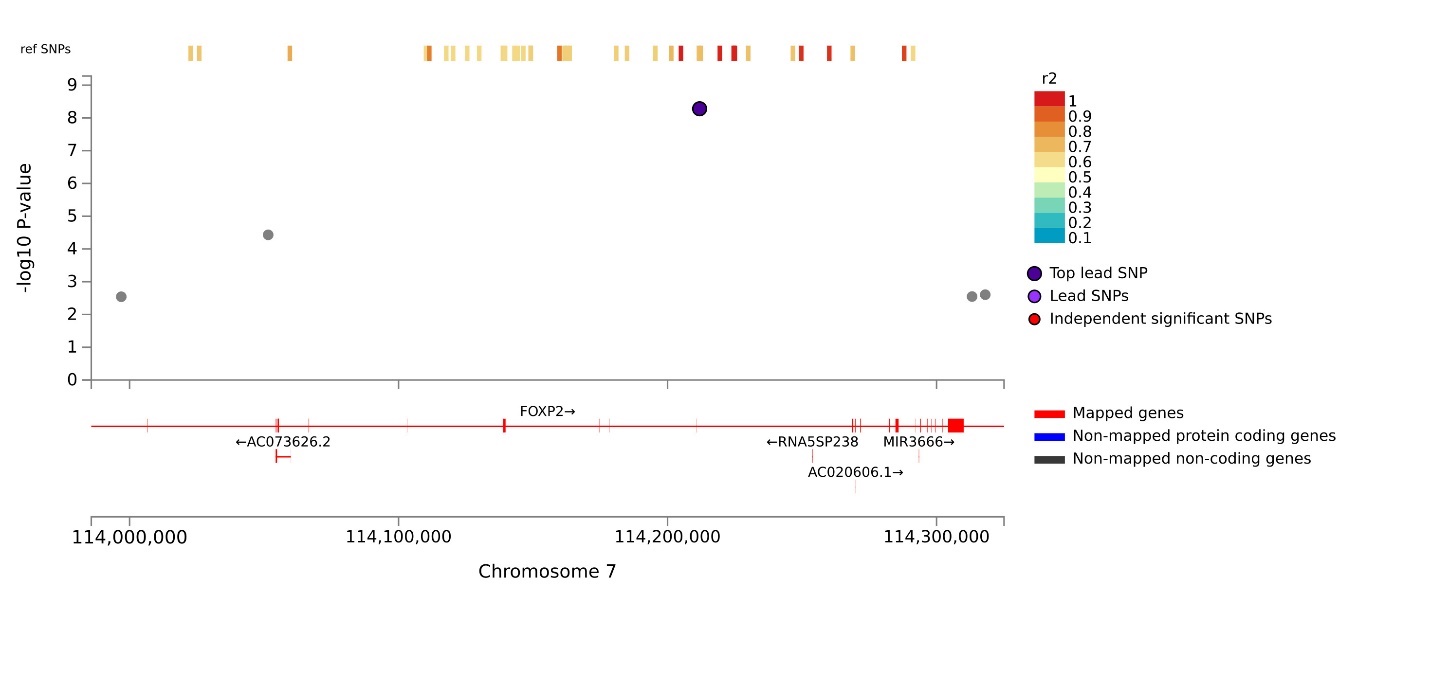


Locus 27 EA:


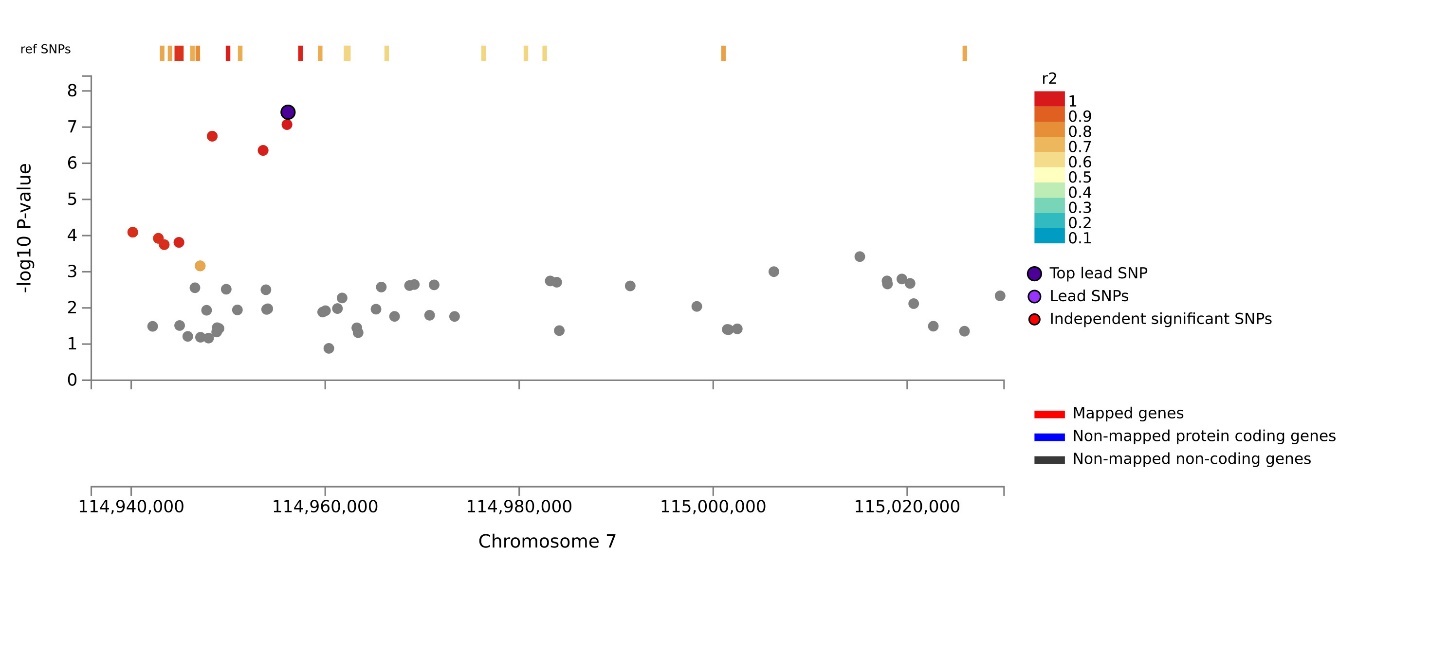


Locus 28 EA_LA:


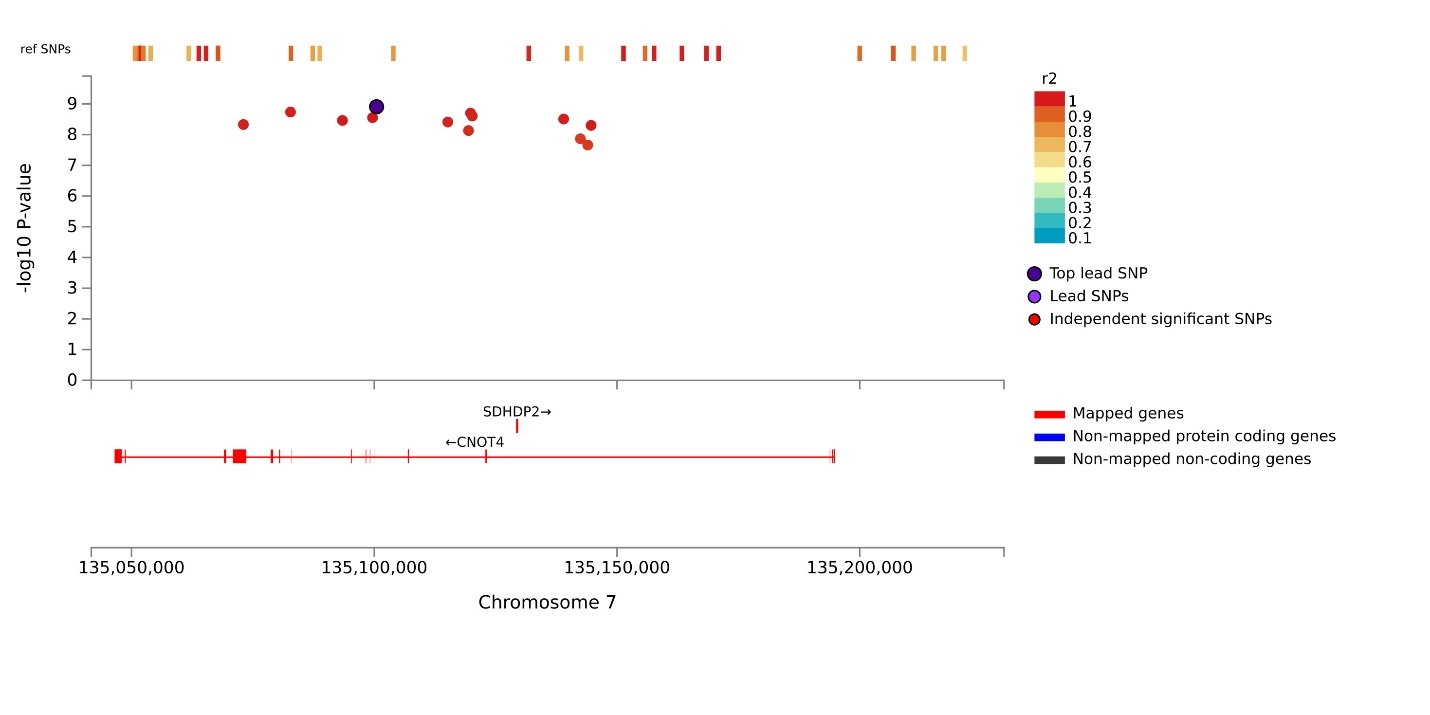


Locus 28 EA:


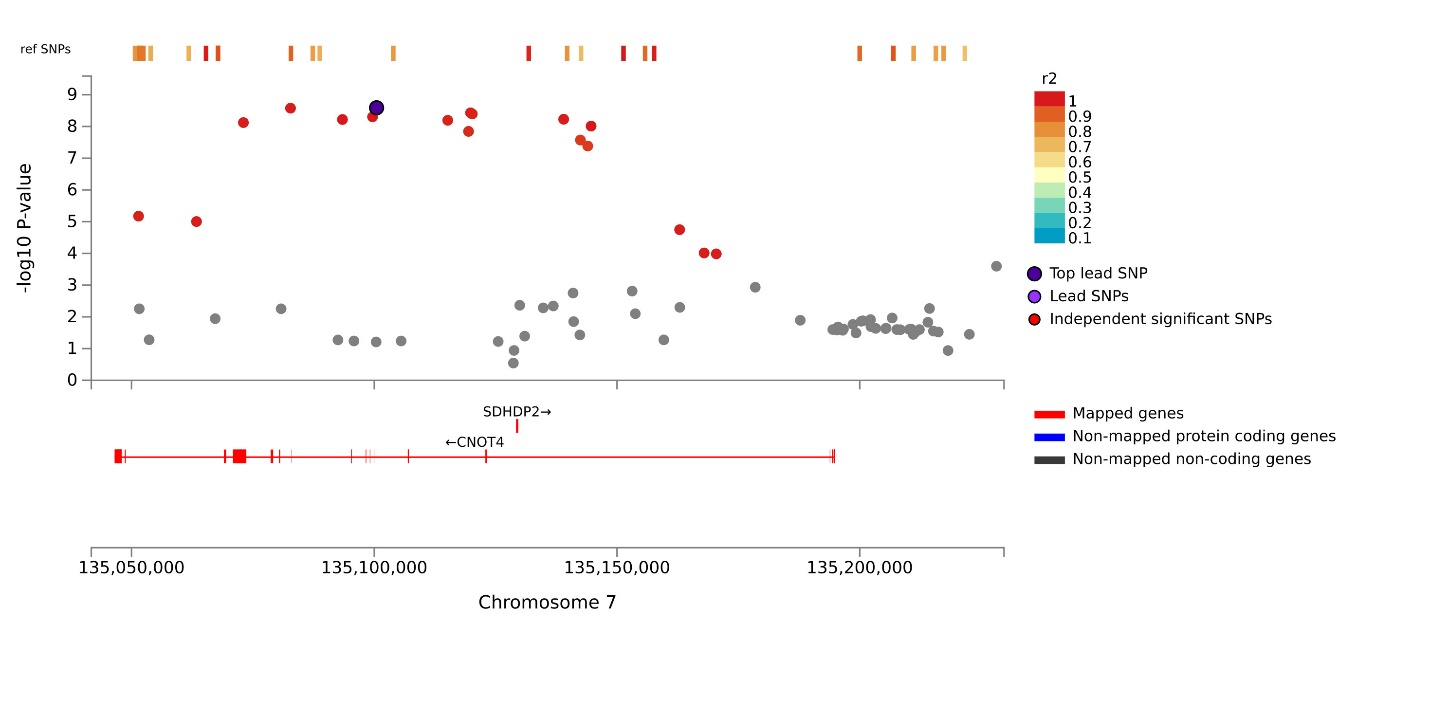


Locus 29 EA:


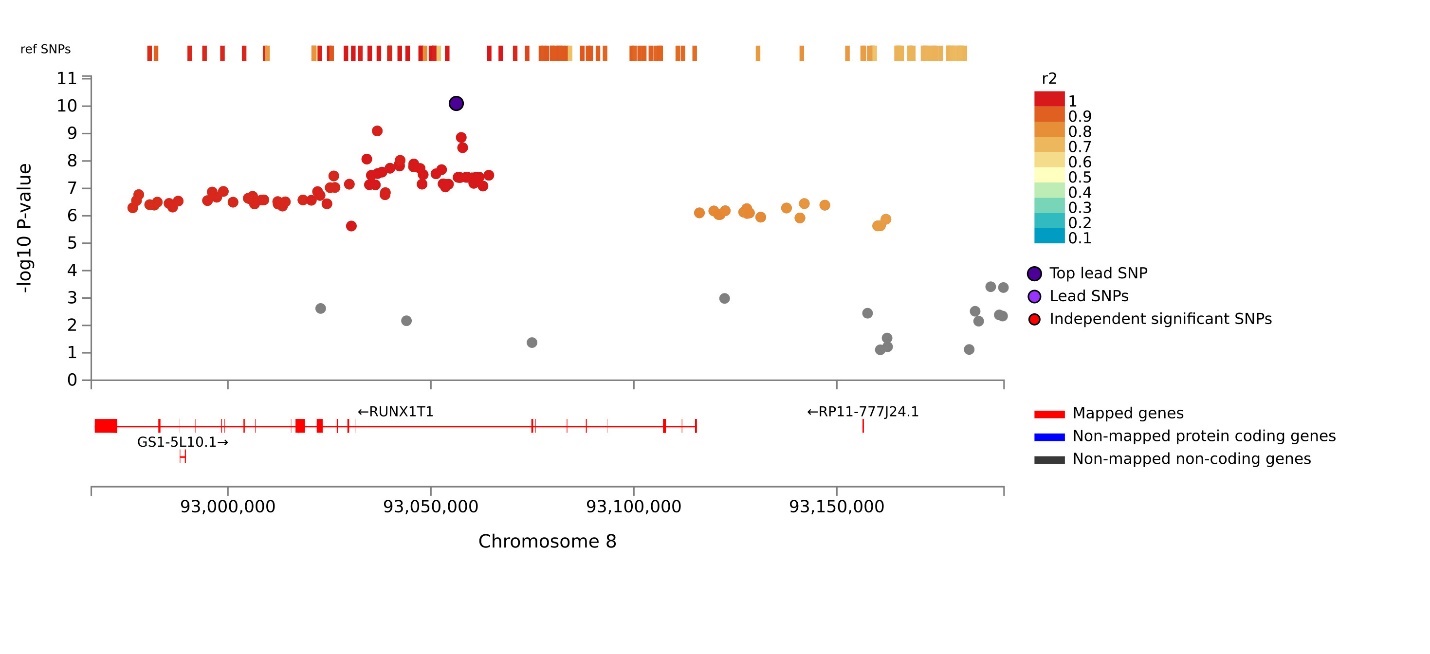


Locus 30 EA:


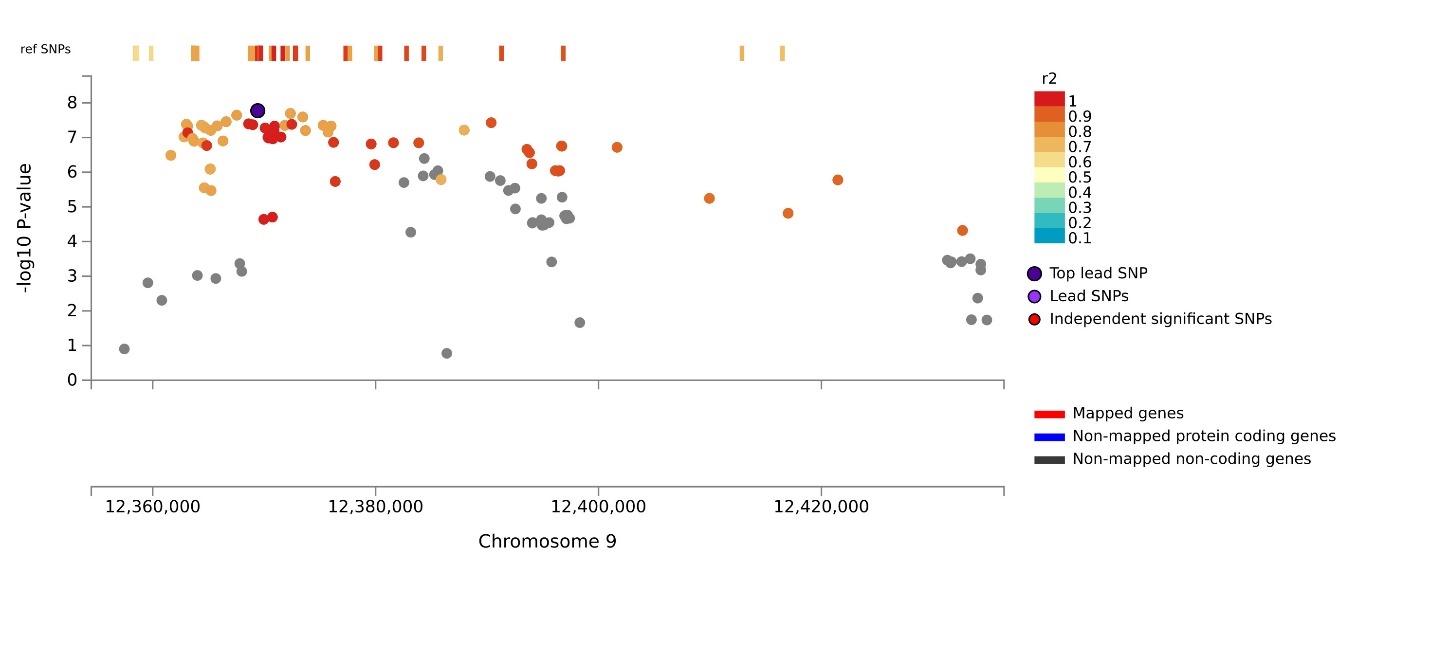


Locus 31 EA_LA:


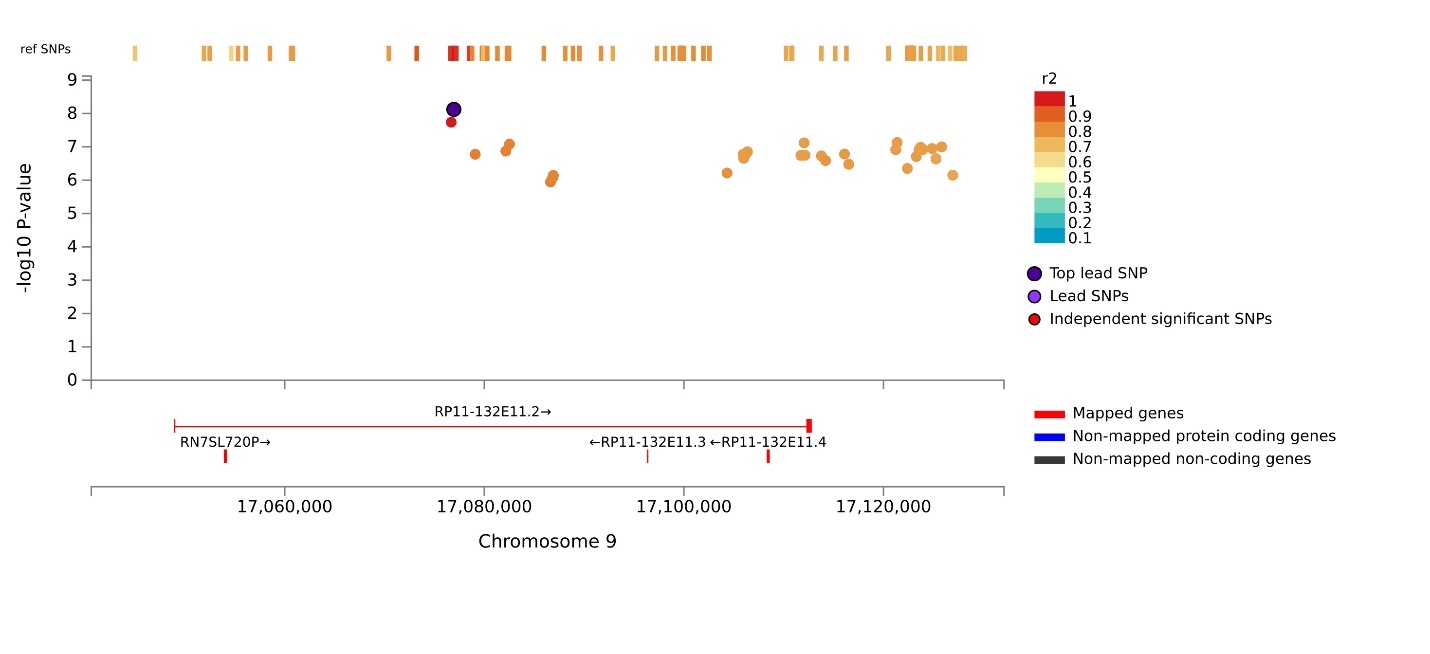


Locus 31 EA:


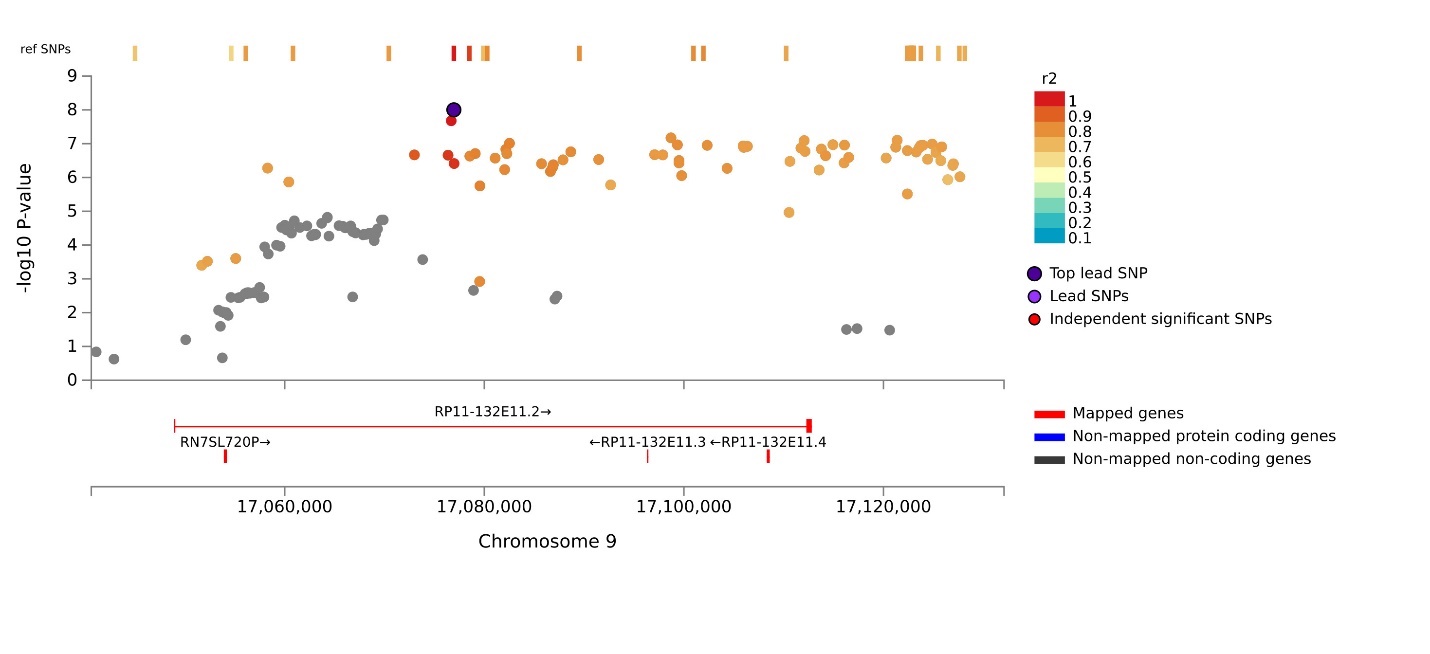


Locus 32 EA:


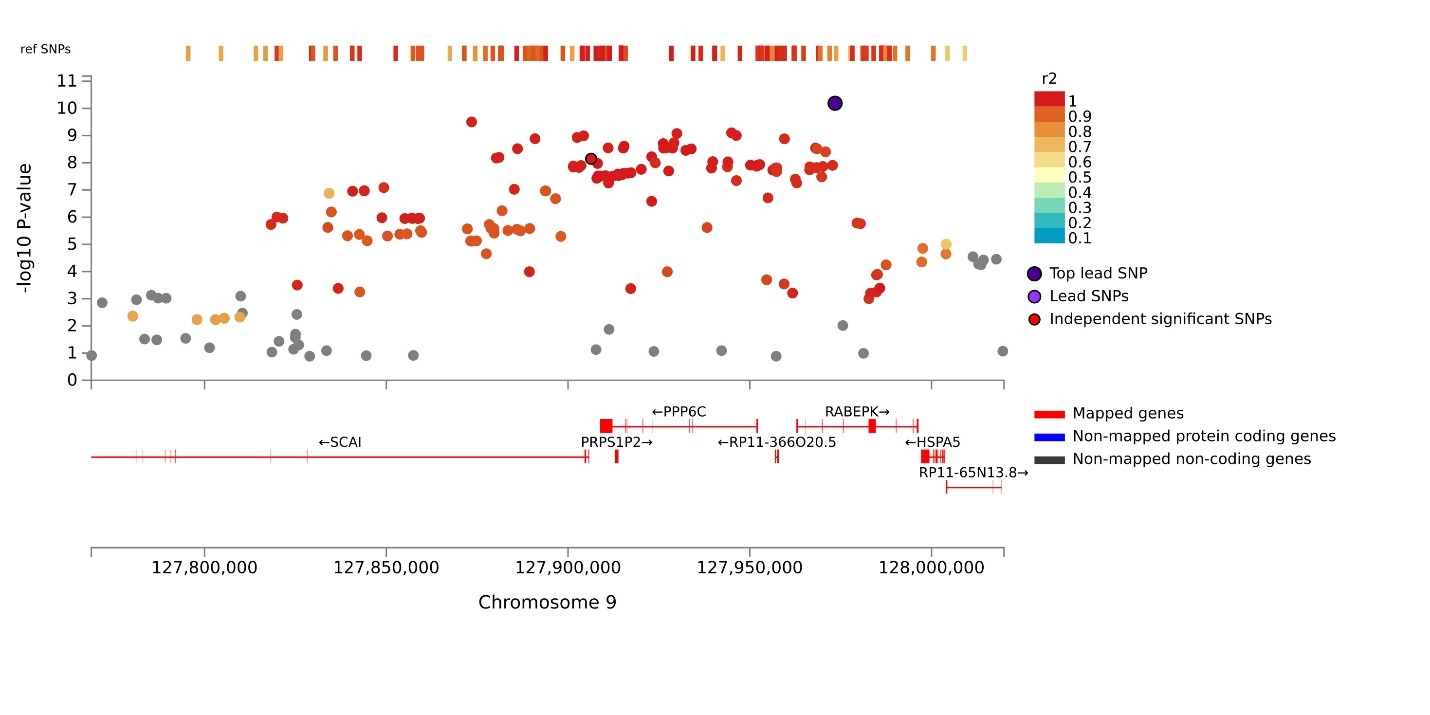


Locus 32 EA_LA:


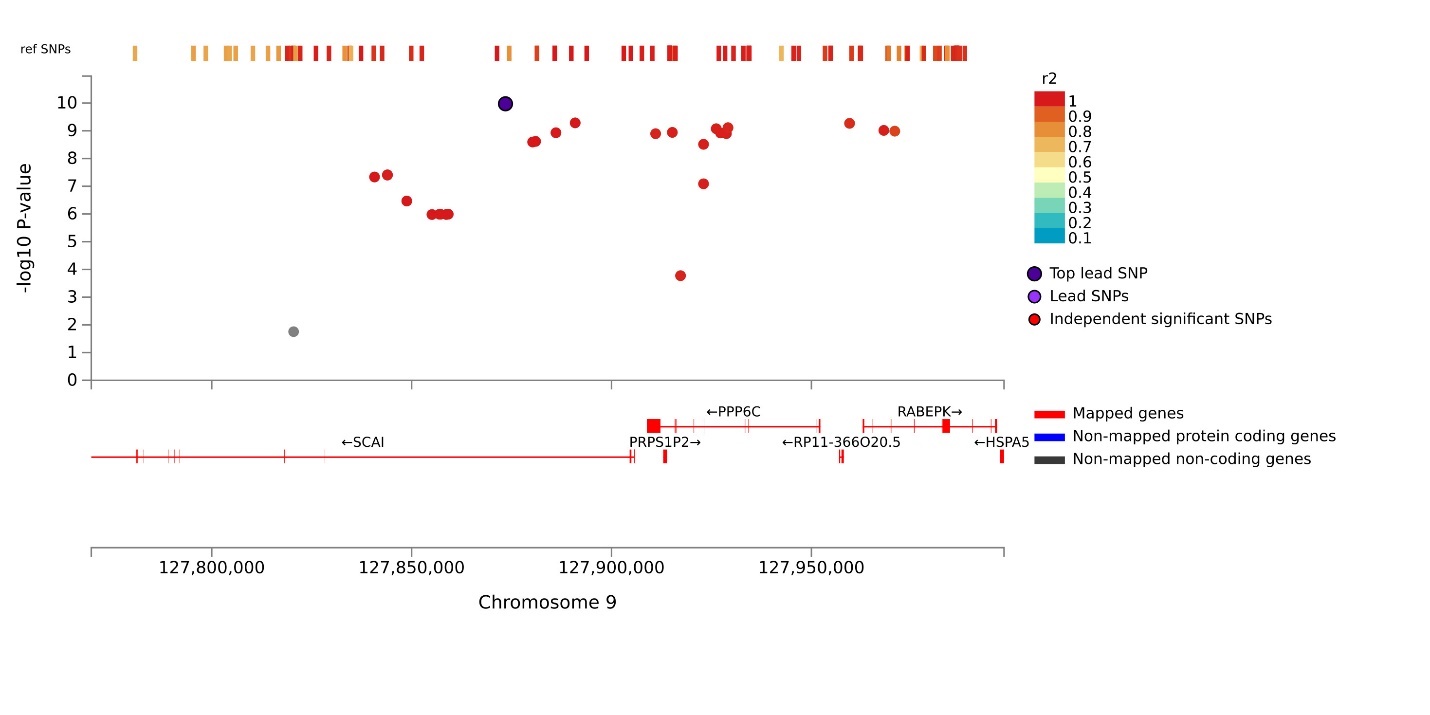


Locus 33 EA:


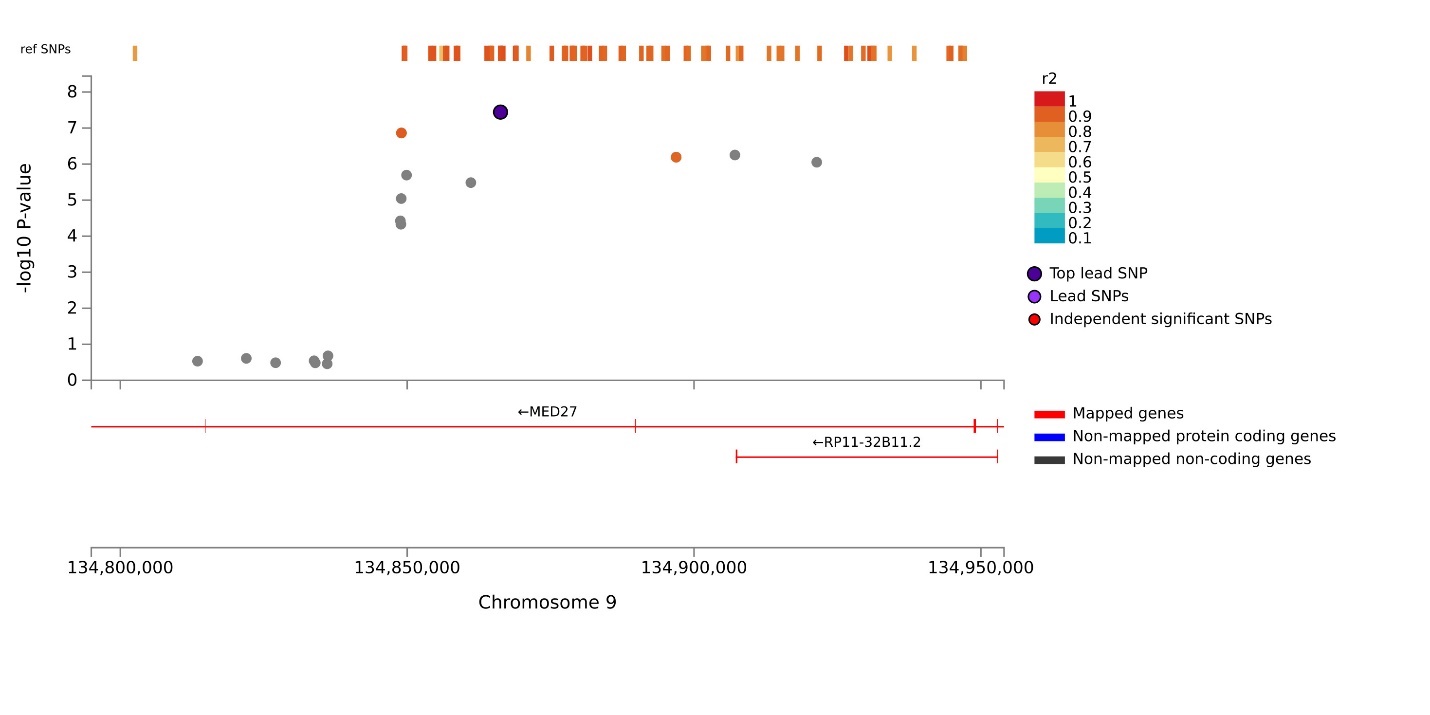


Locus 34 EA_LA:


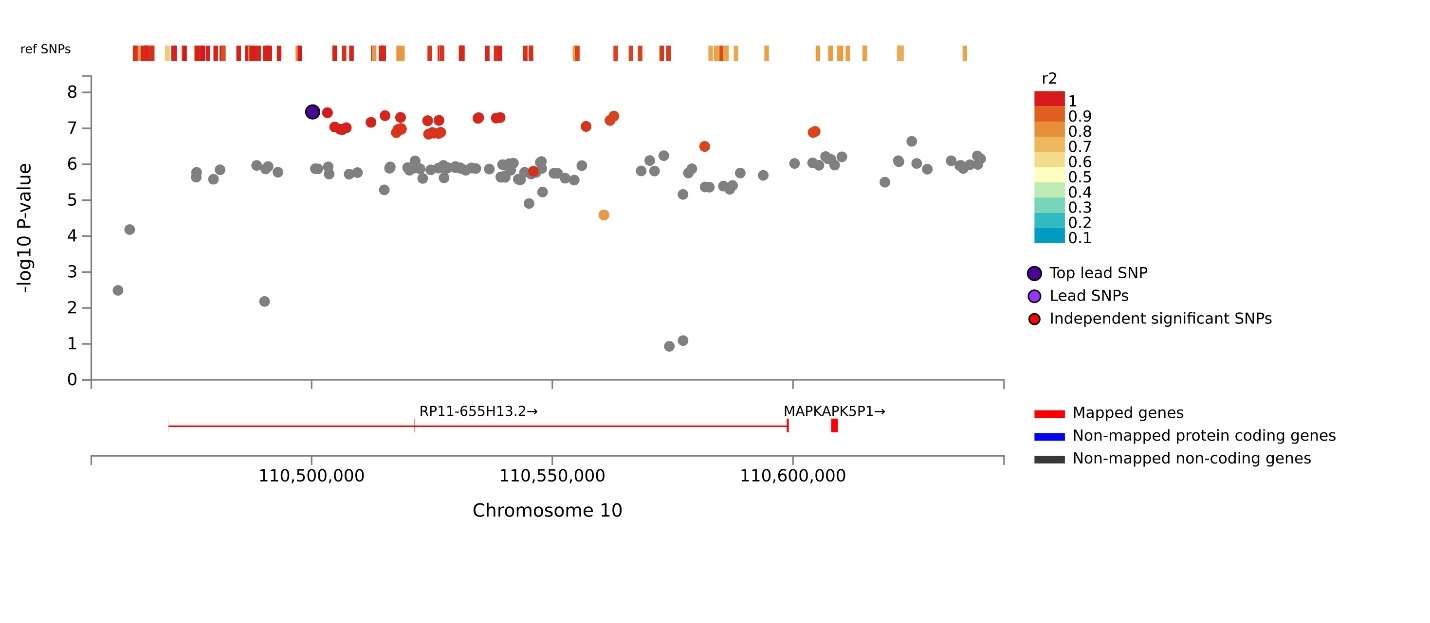


Locus 35 EA:


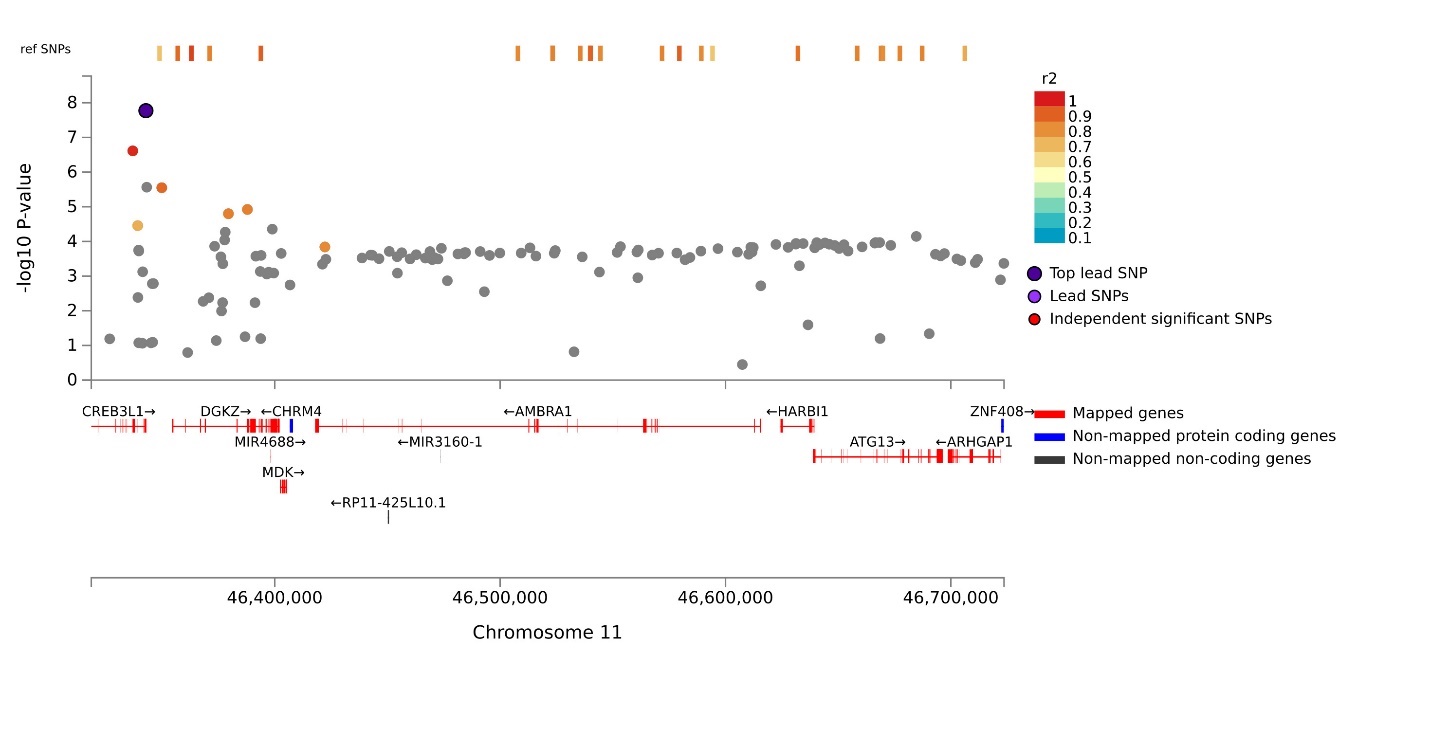


Locus 36 EA:


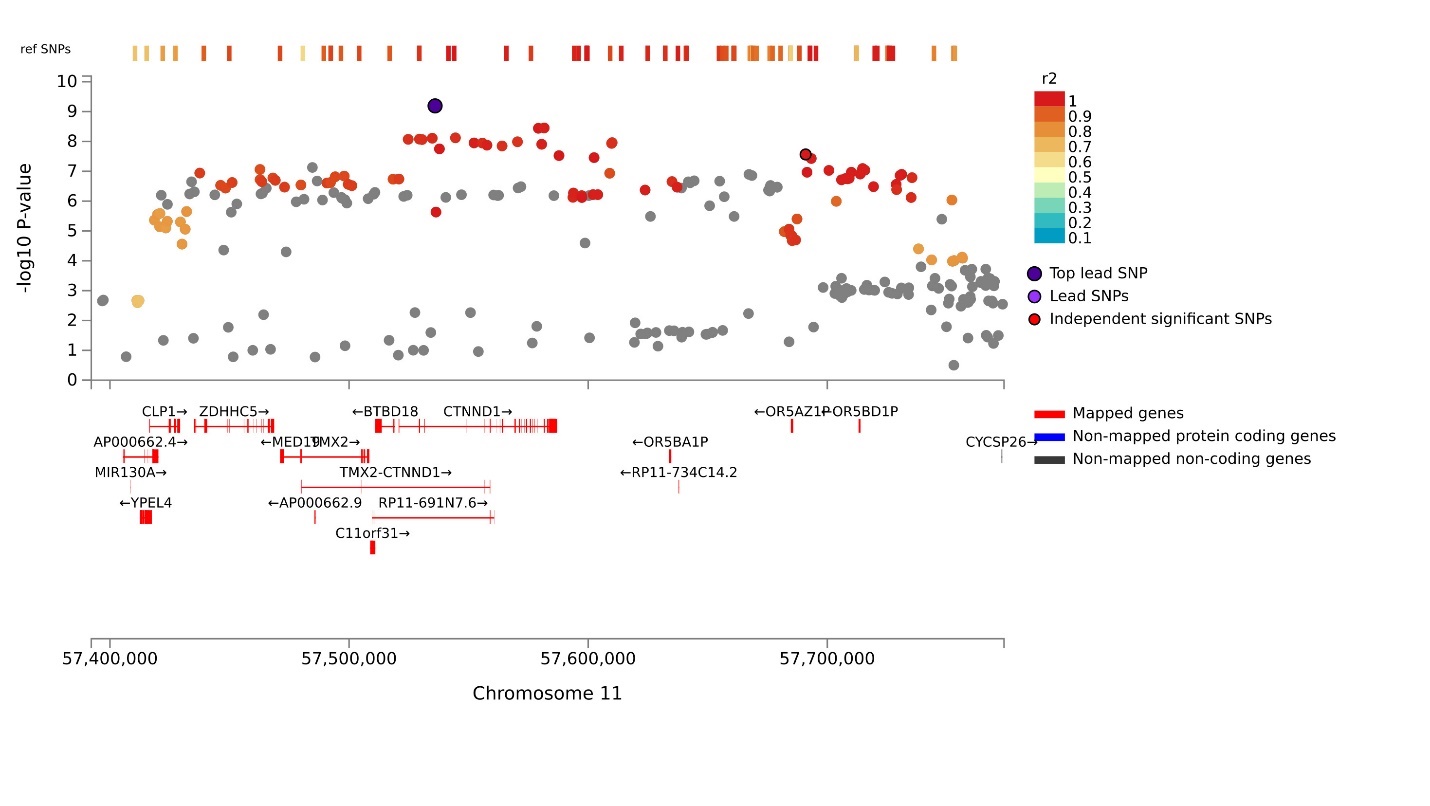


Locus 37 AA_EA_LA rs1116313:


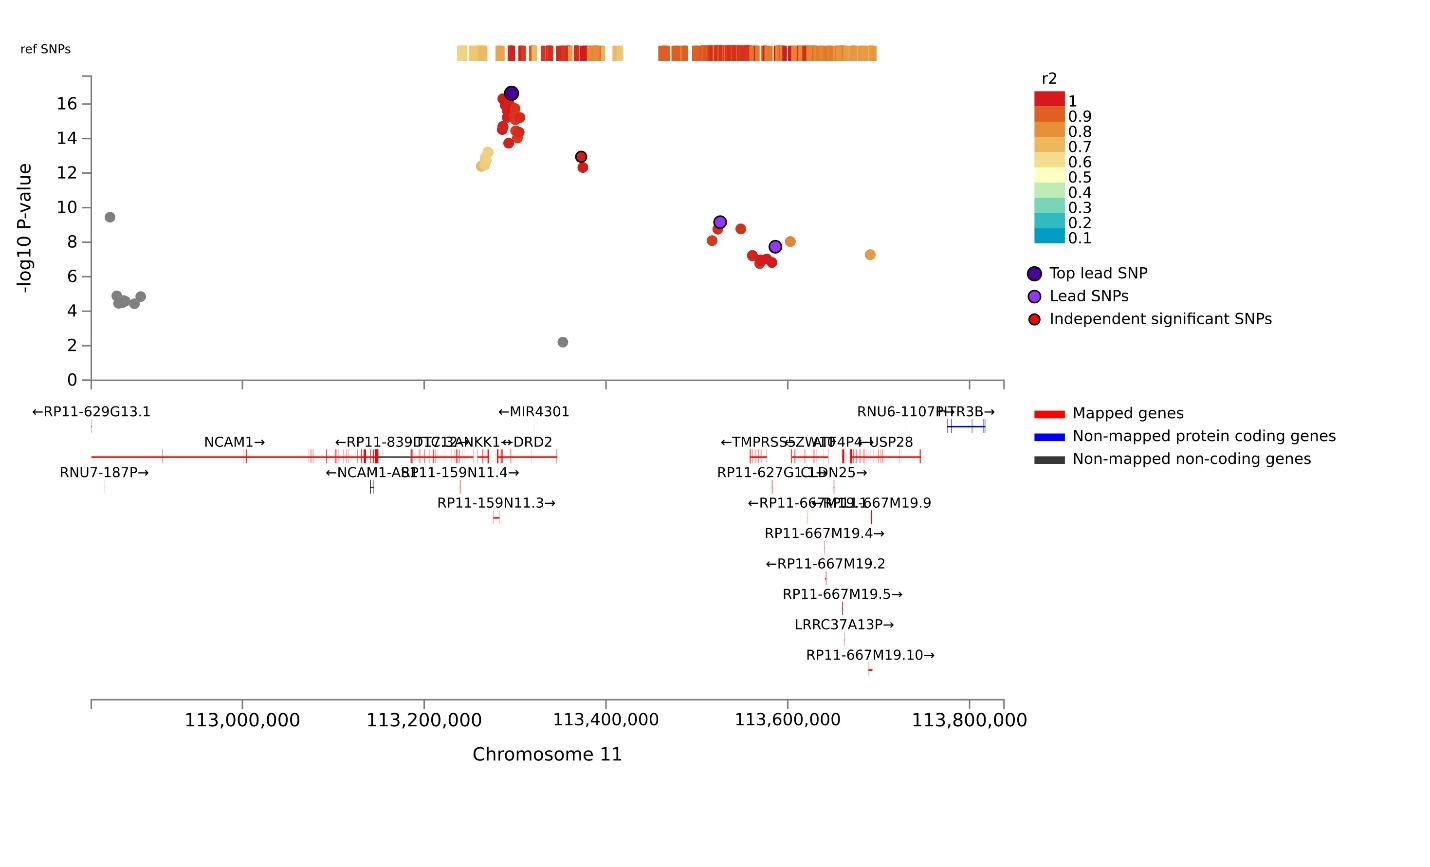


Locus 37 AA_EA_LA rs4444109:


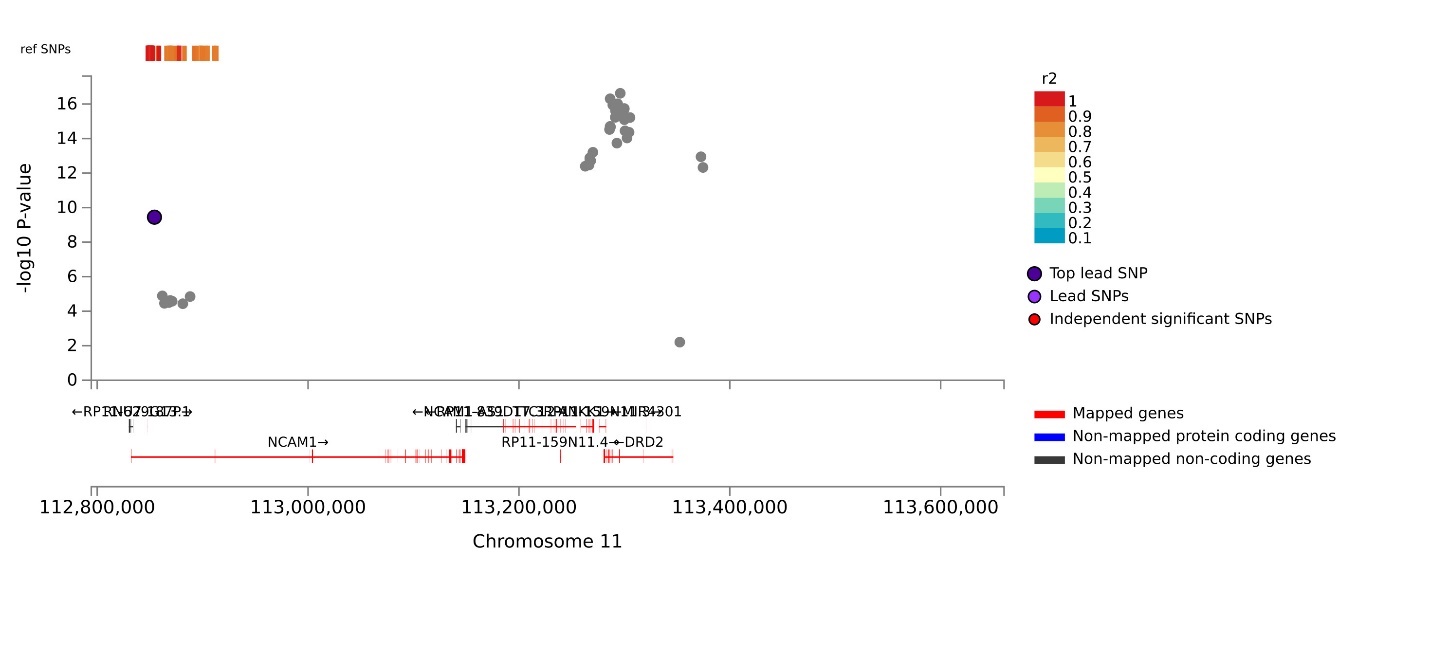


Locus 37 EA rs12363125:


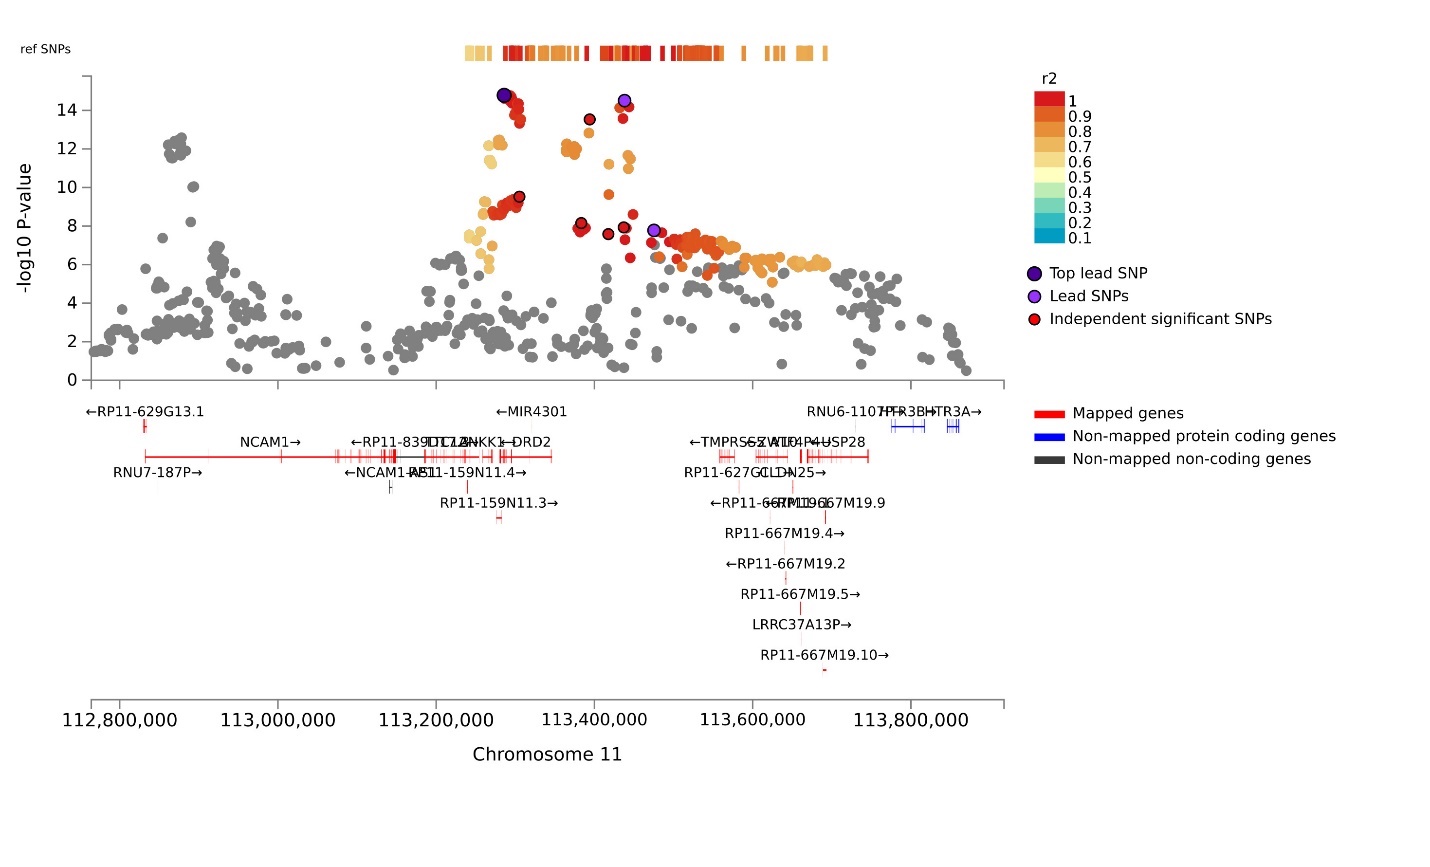


Locus 37 EA rs7118907:


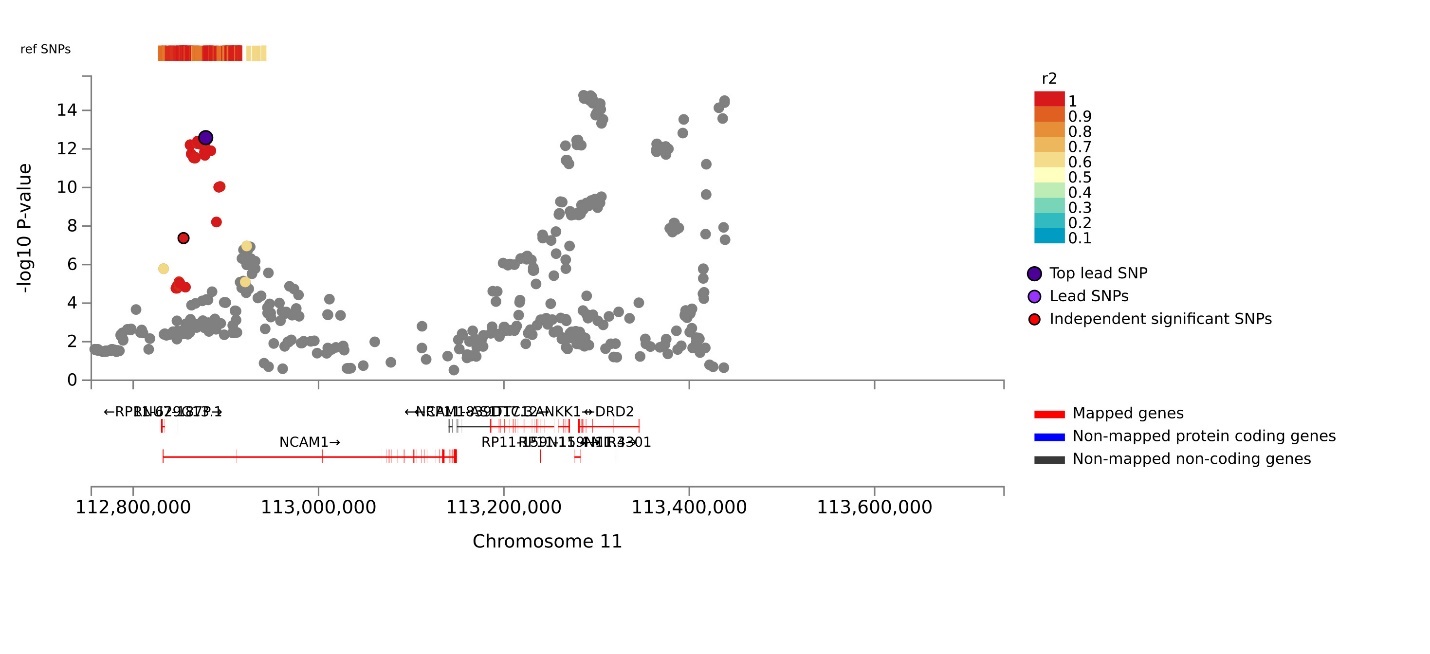


Locus 37 AA_EA:


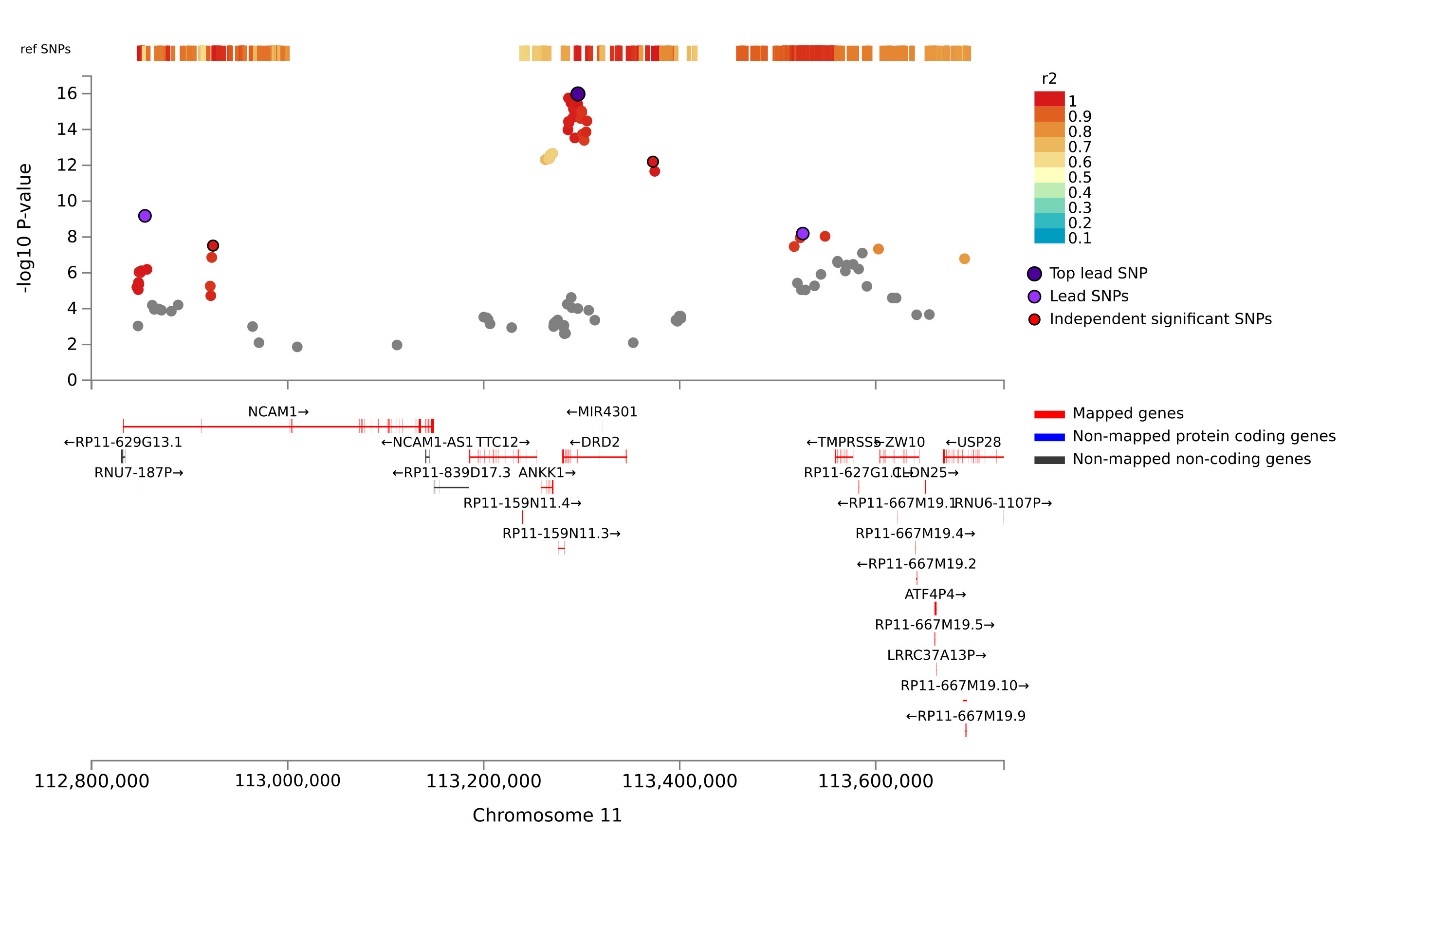


Locus 37 EA_LA rs7118907:


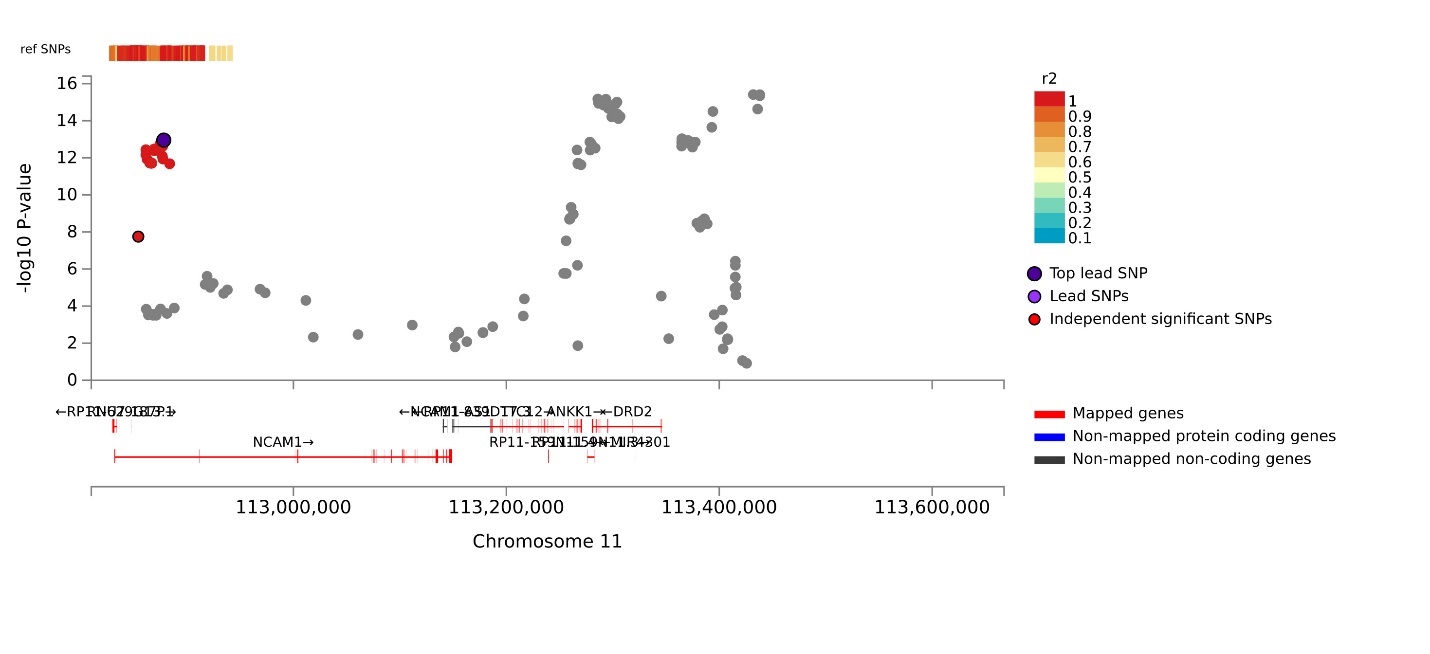


Locus 38 EA_LA rs4936277:


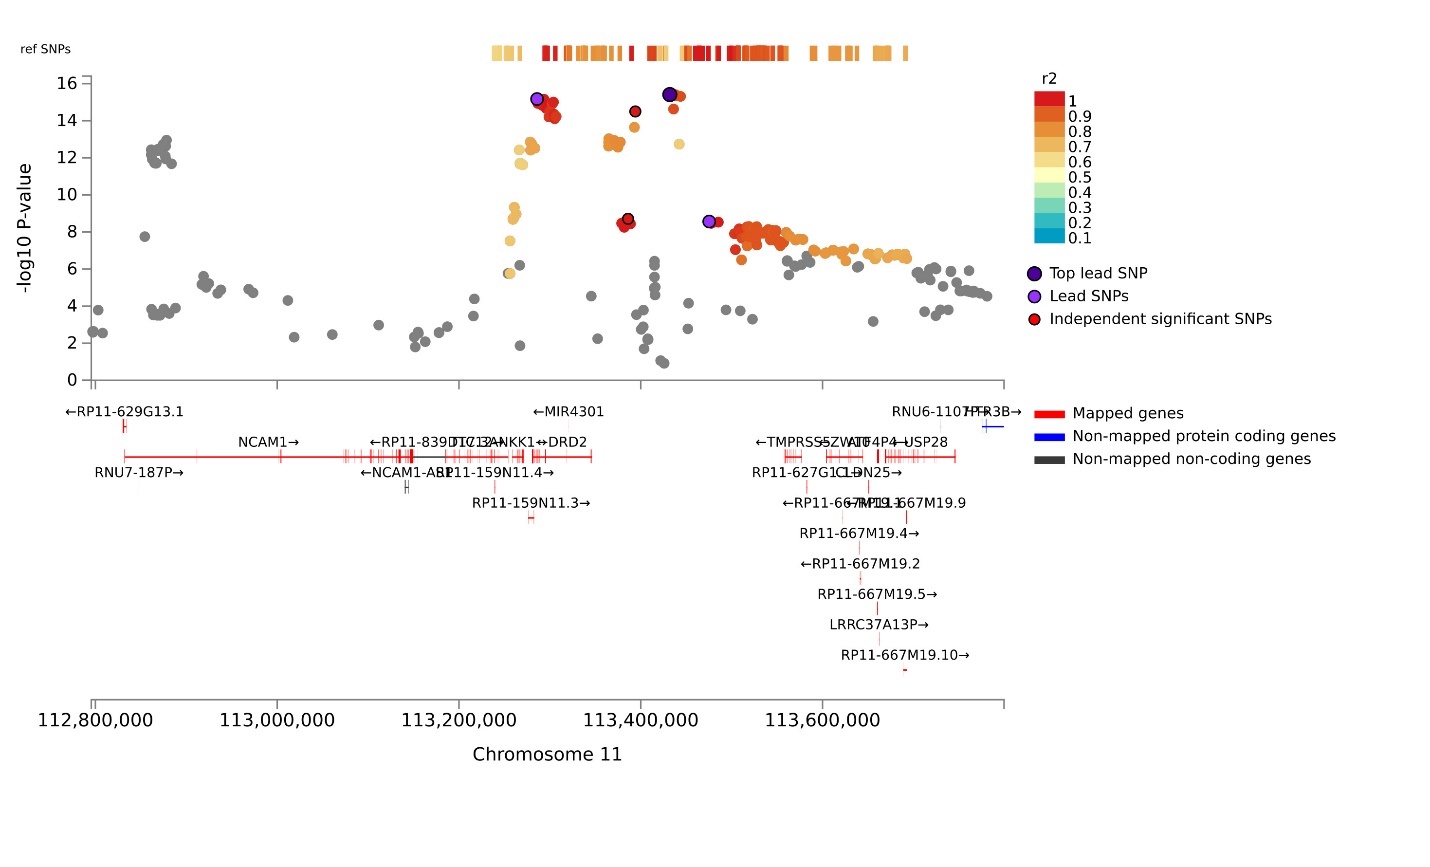


Locus 38 EA_LA:


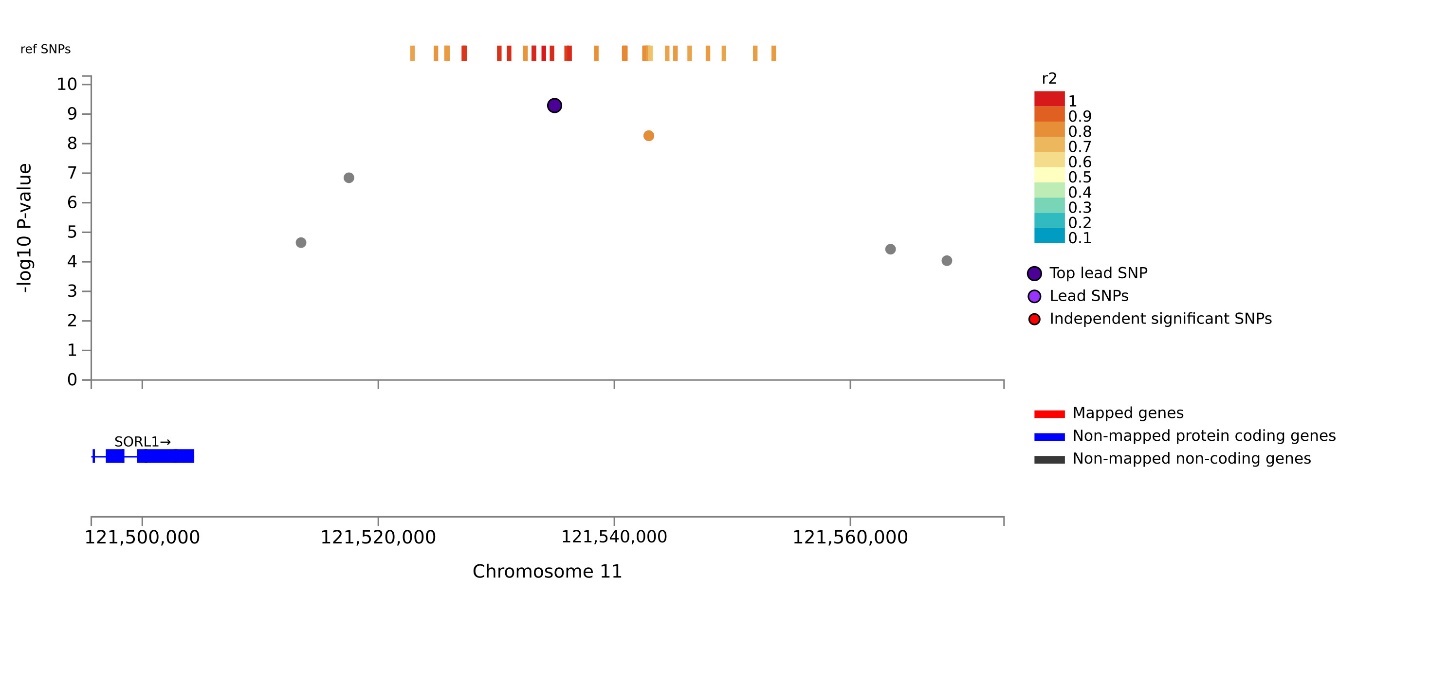


Locus 38 EA:


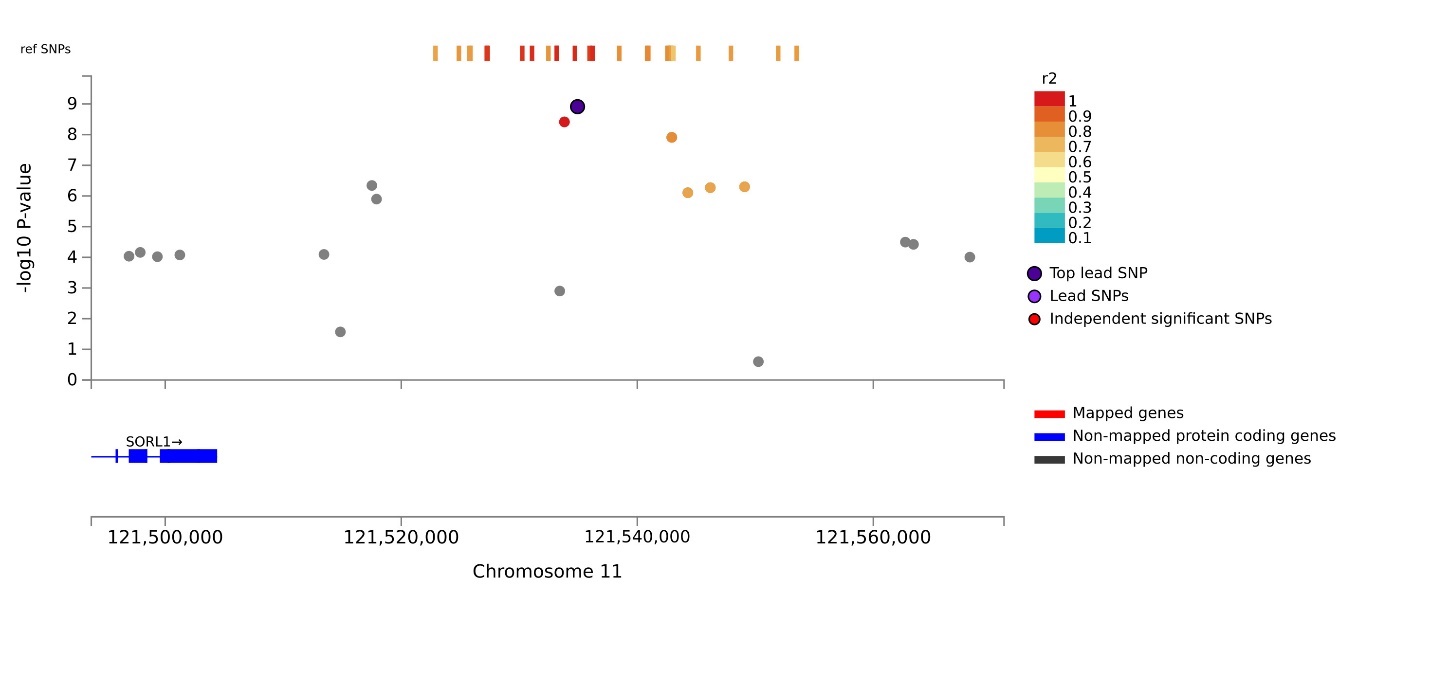


Locus 38 AA_EA:


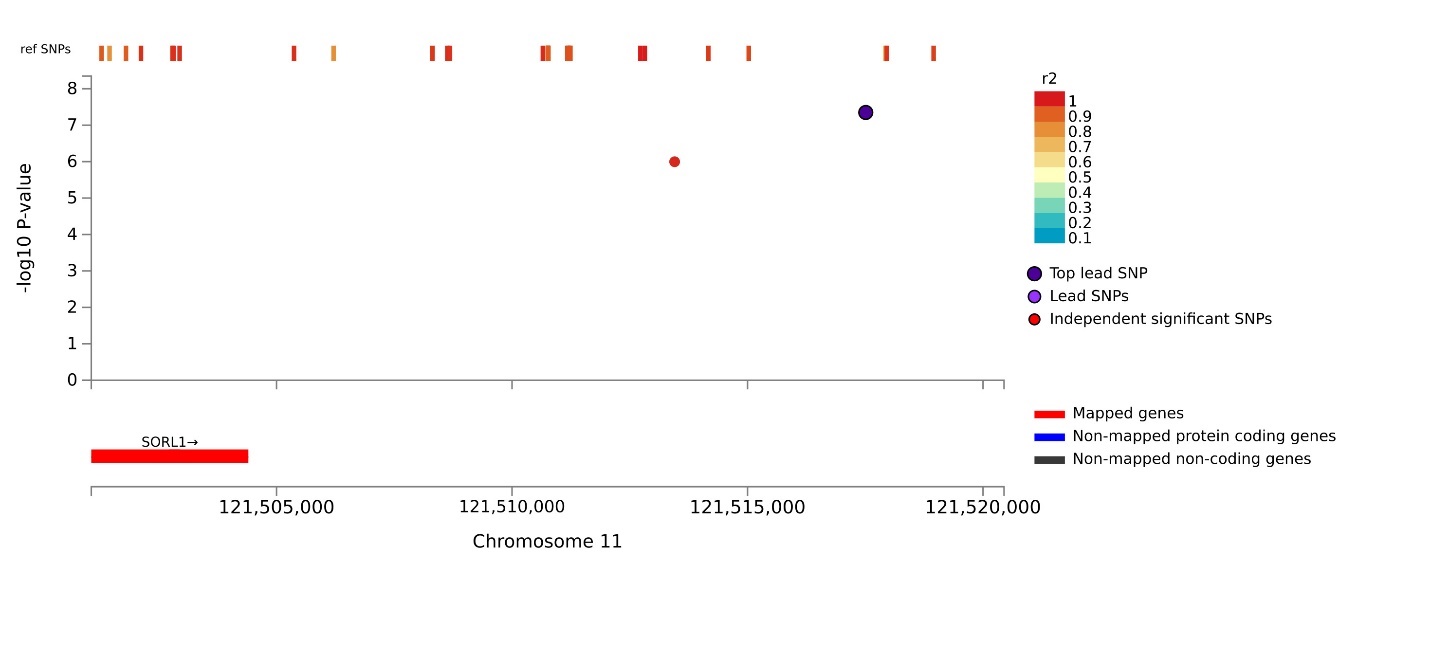


Locus 38 AA_EA_LA:


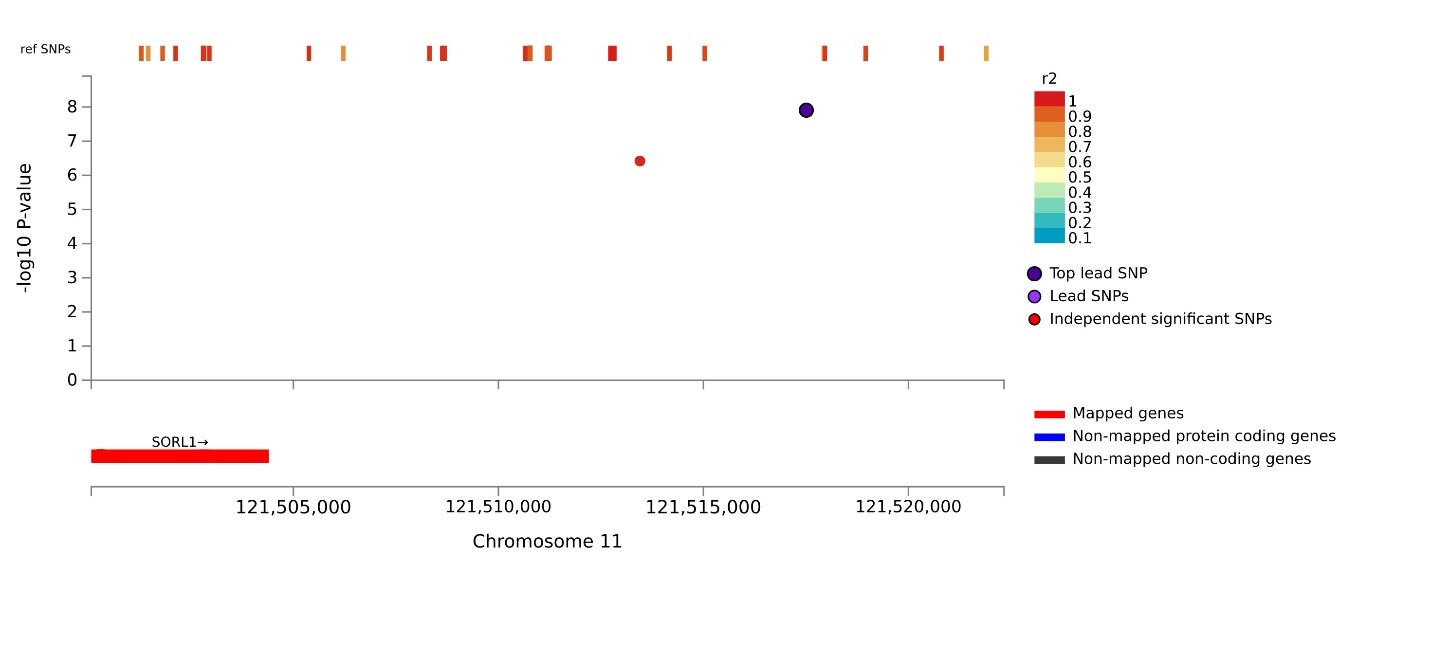


Locus 39 EA:


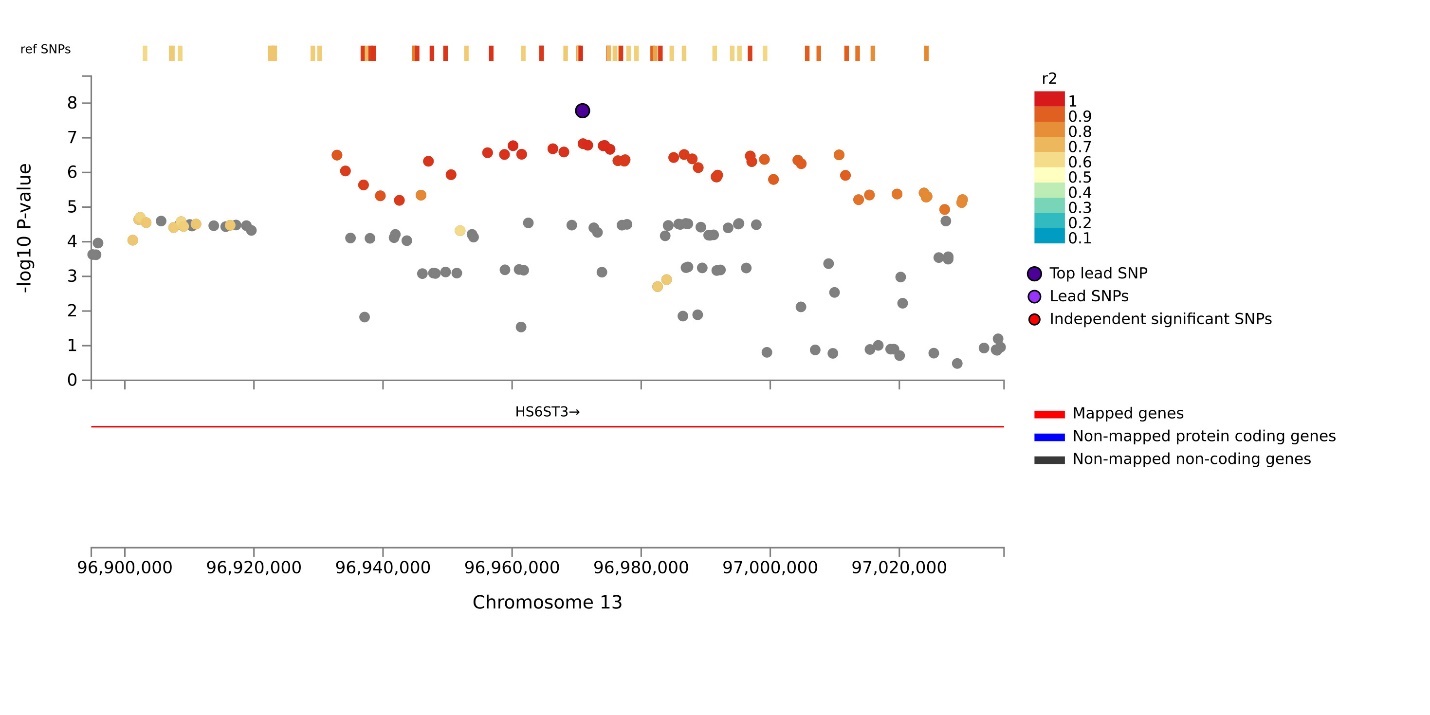


Locus 40 EA:


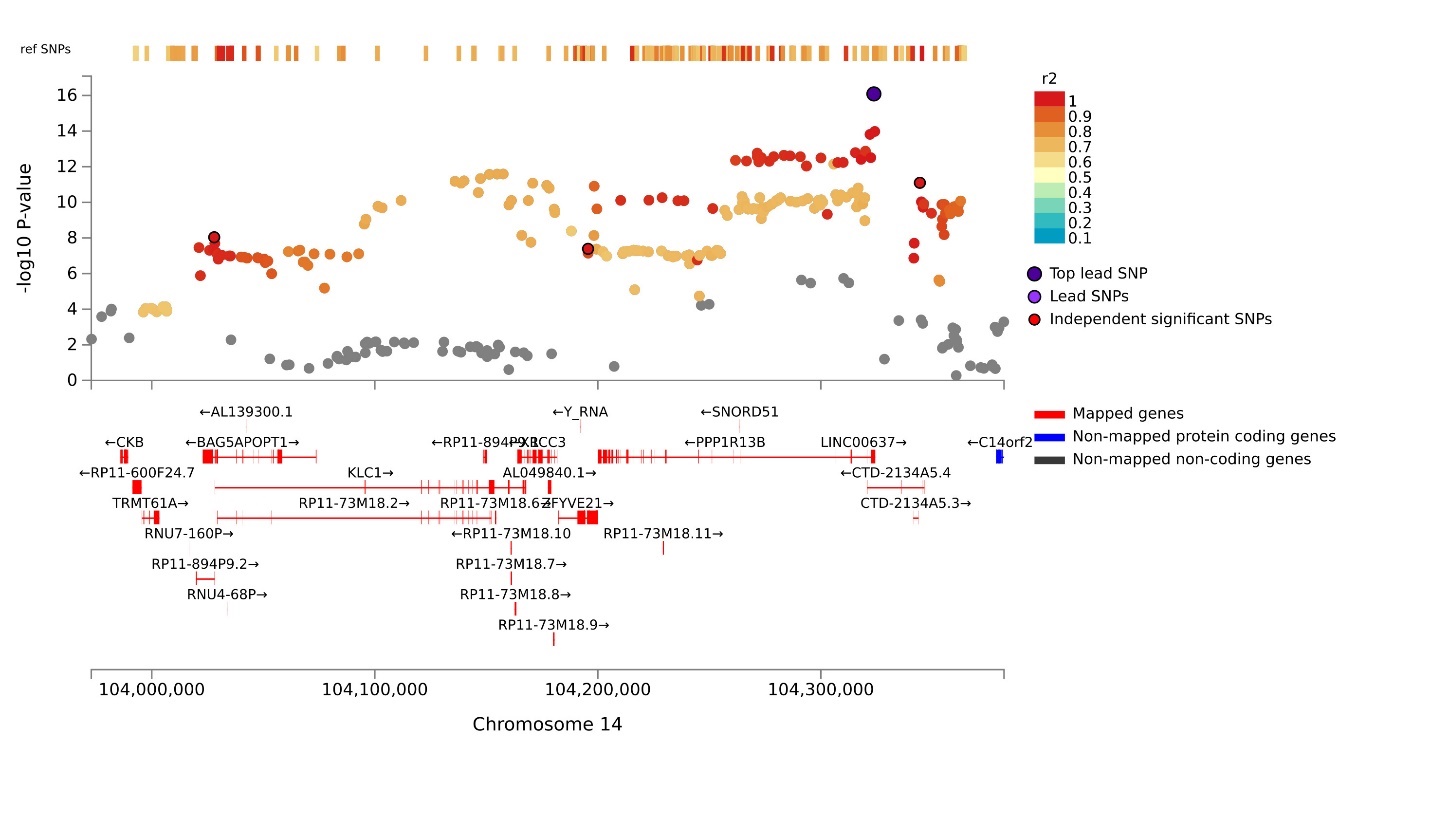


Locus 40 AA_EA:


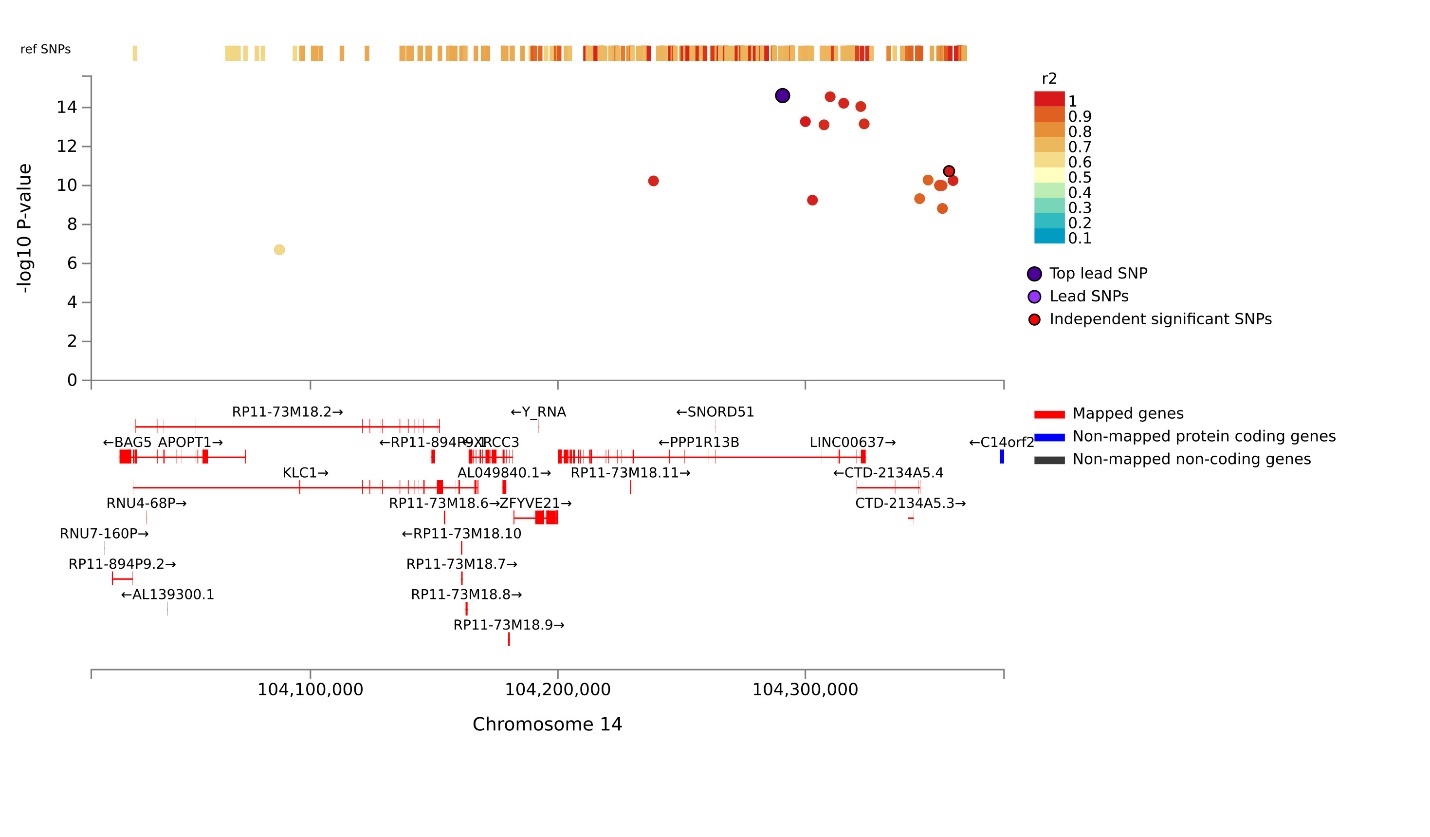


Locus 40 EA_LA:


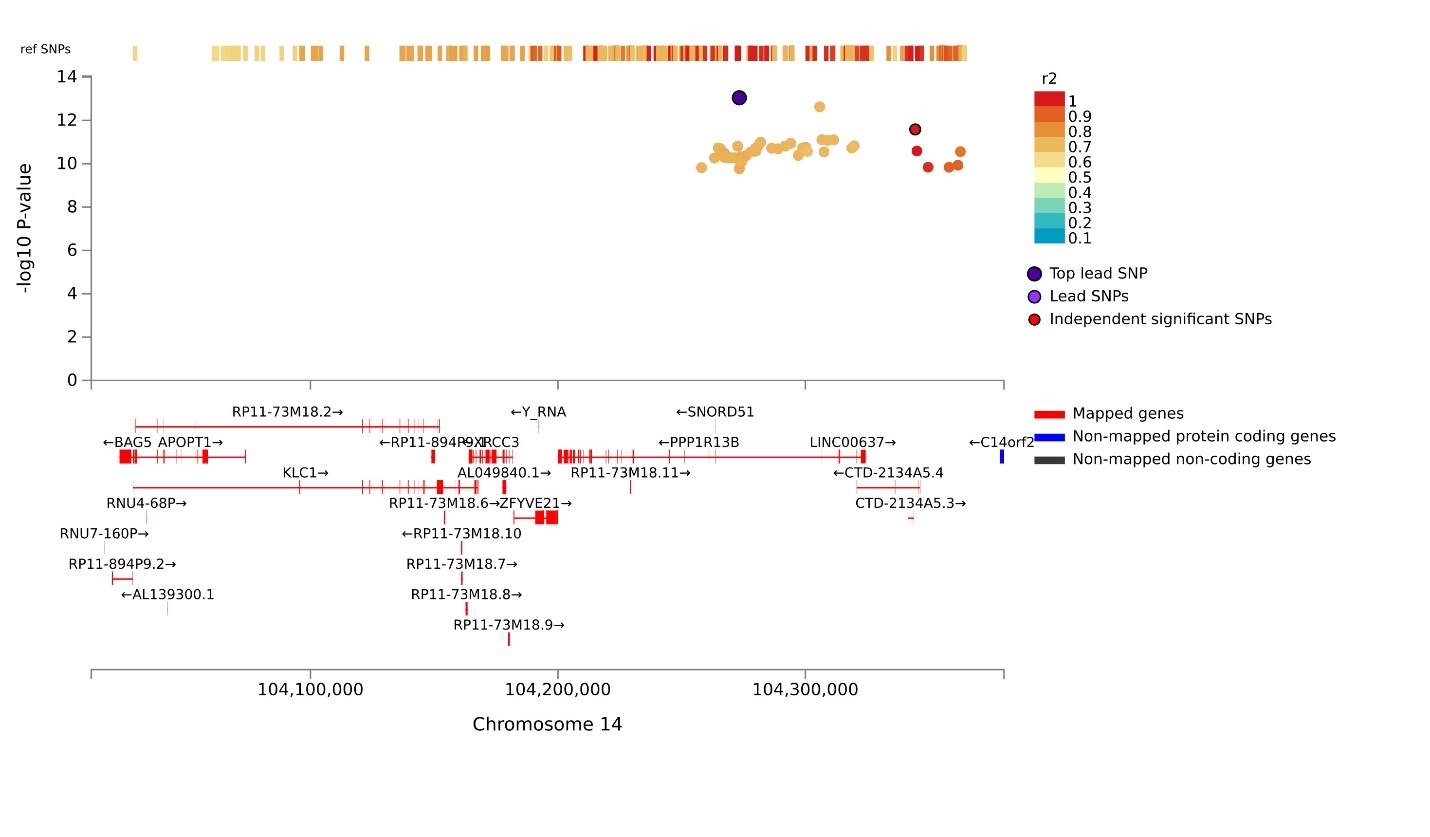


Locus 40 AA_EA_LA:


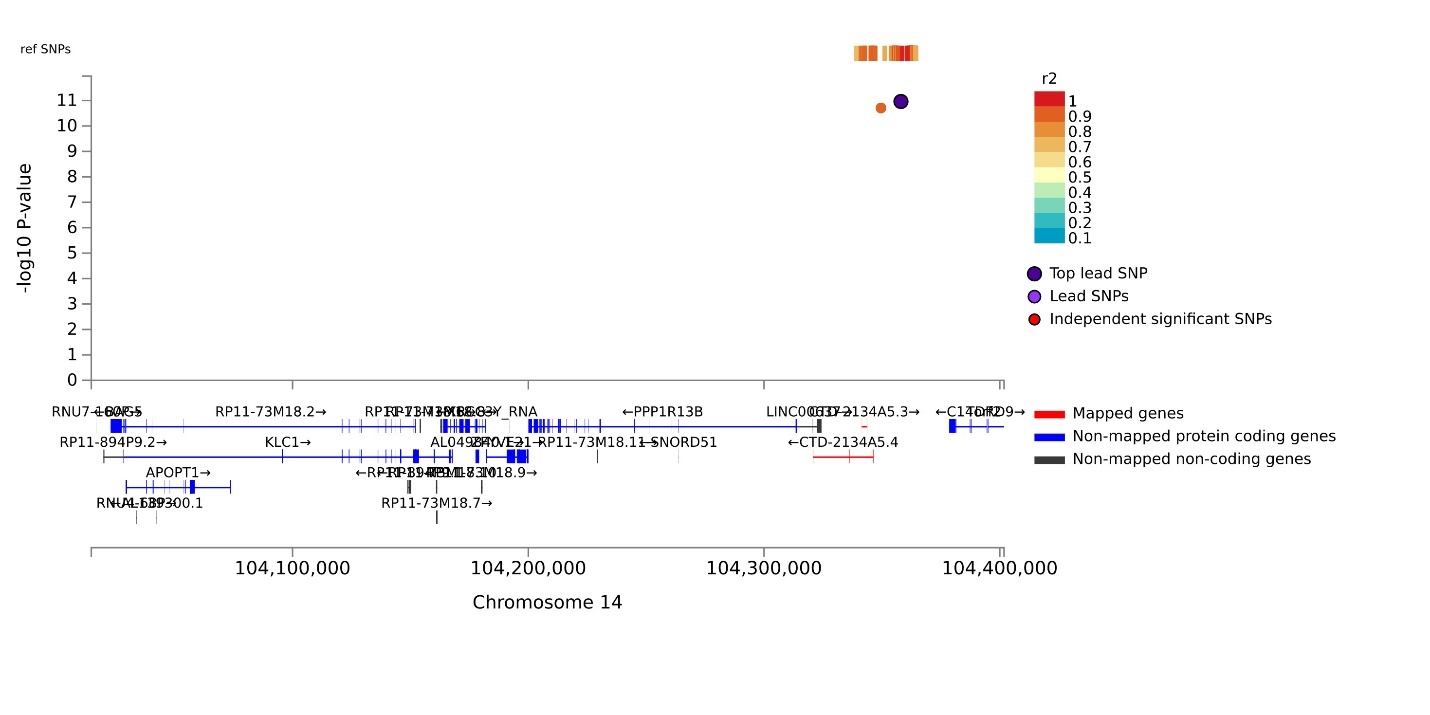


Locus 41 EA:


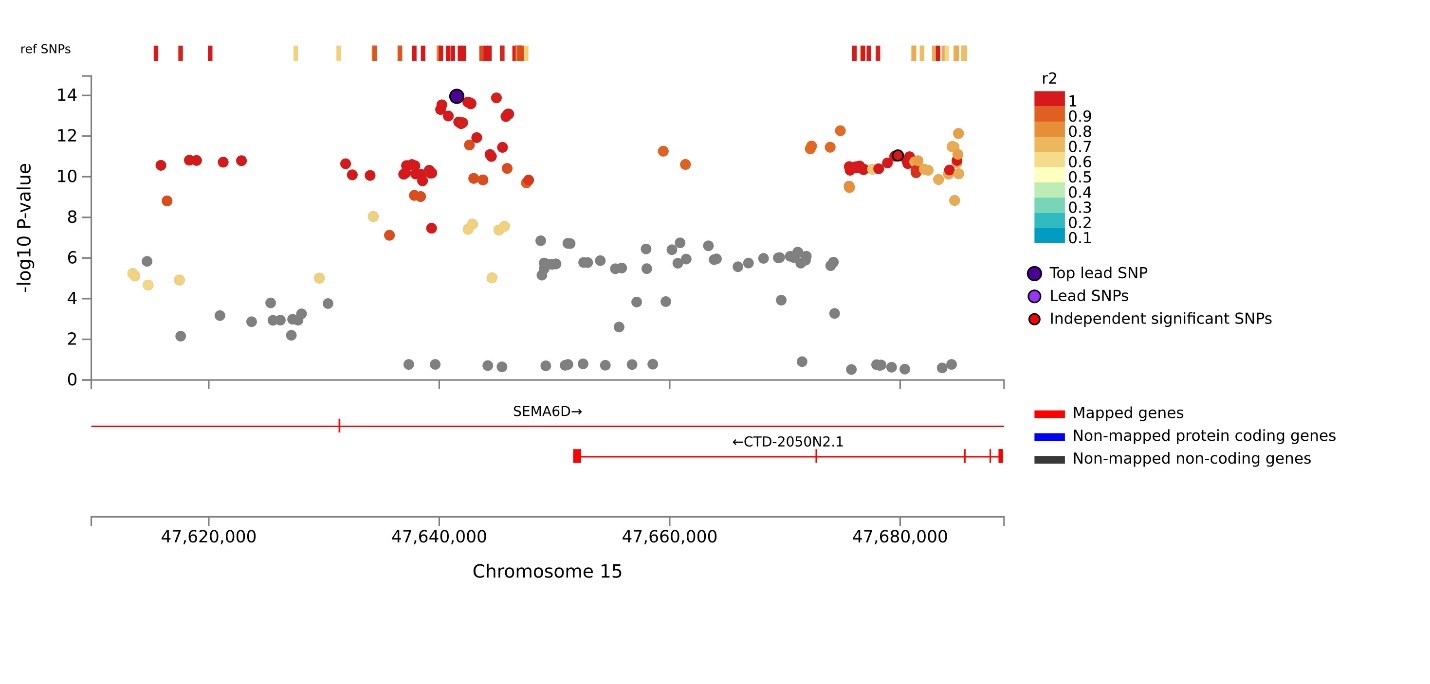


Locus 41 AA_EA:


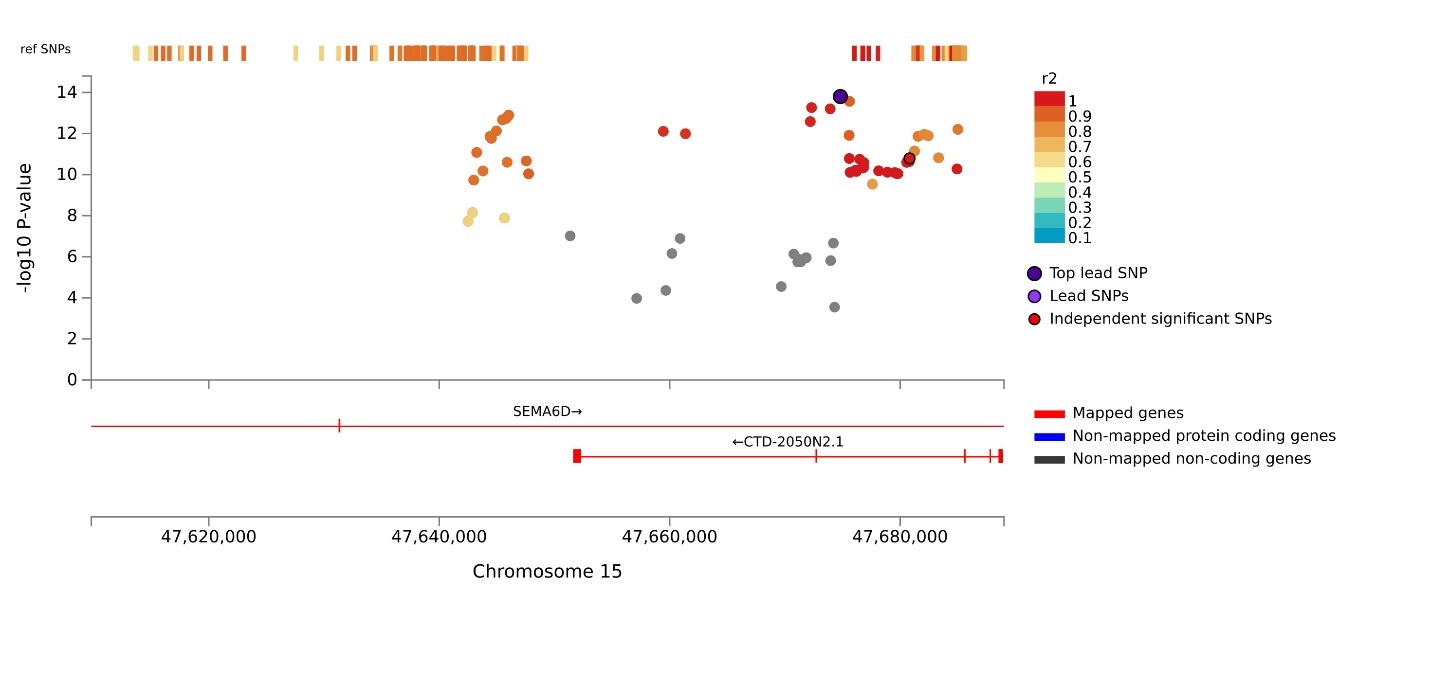


Locus 41 EA_LA:


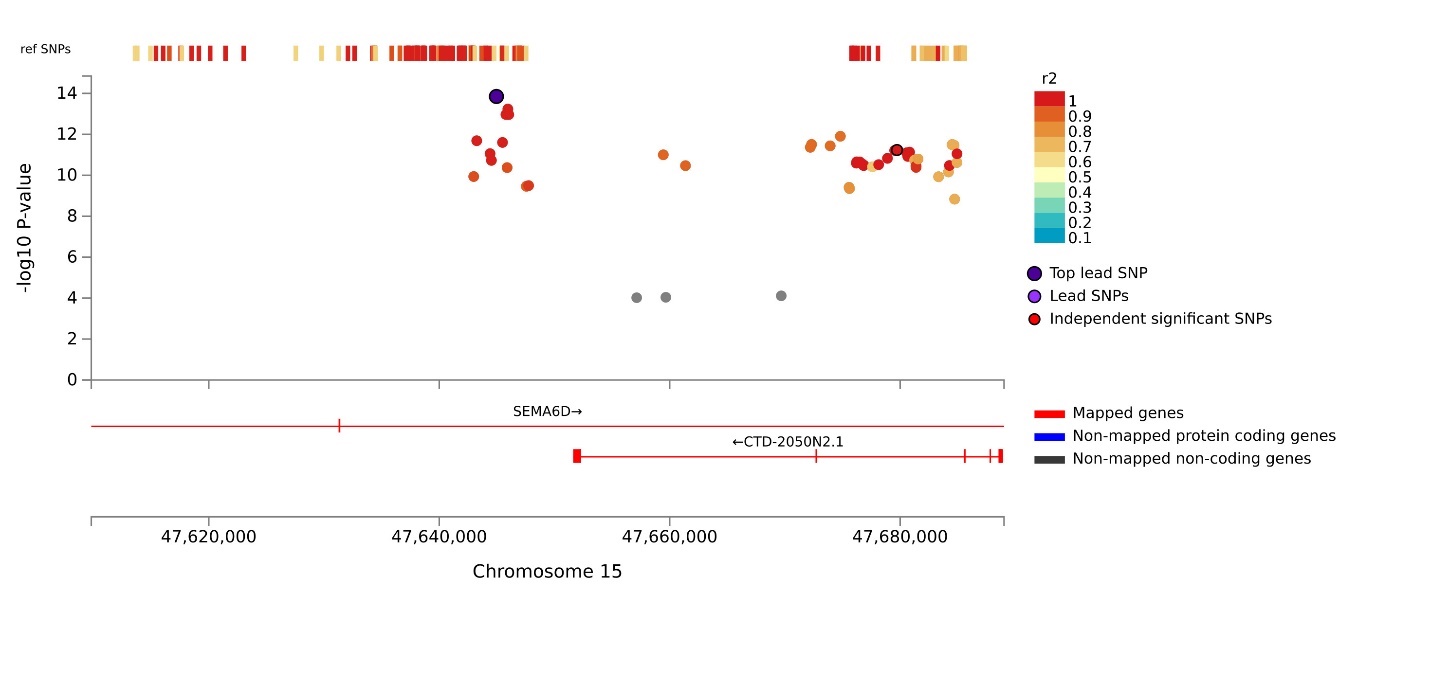


Locus 41 AA_EA_LA:


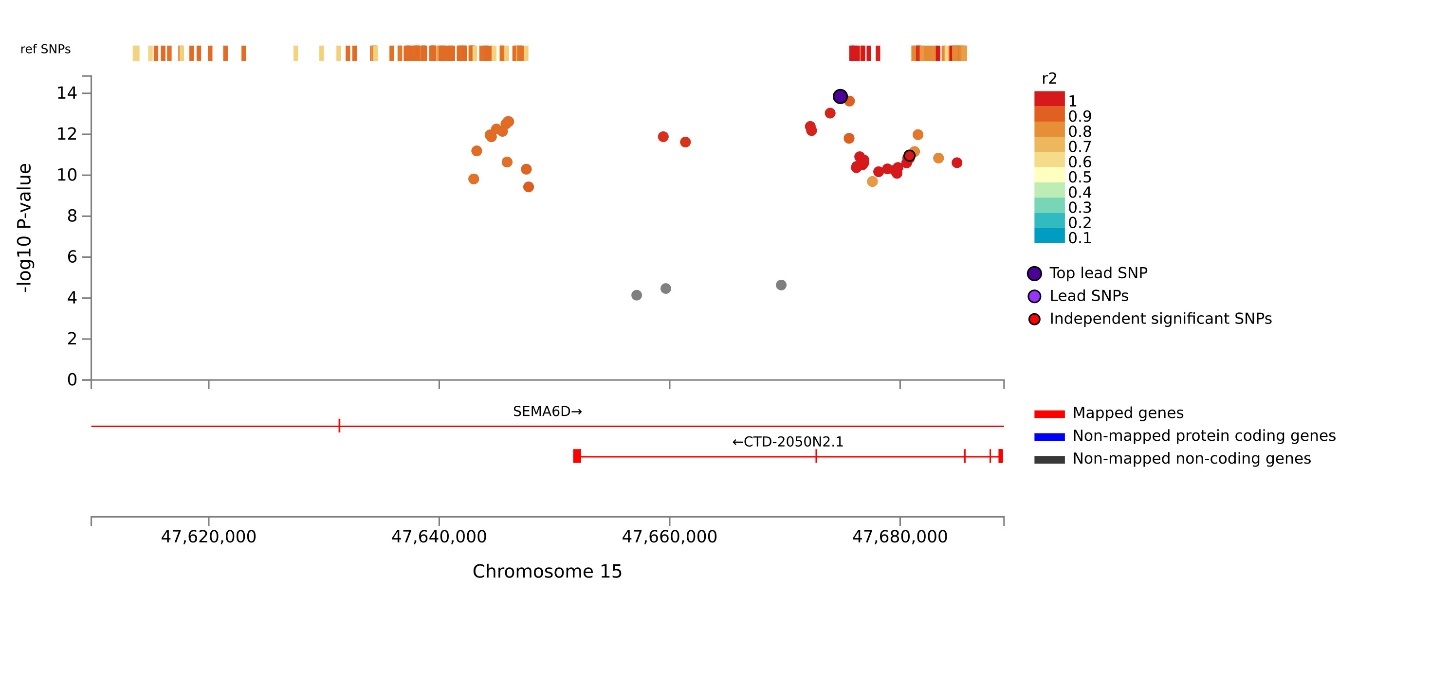


Locus 42 EA:


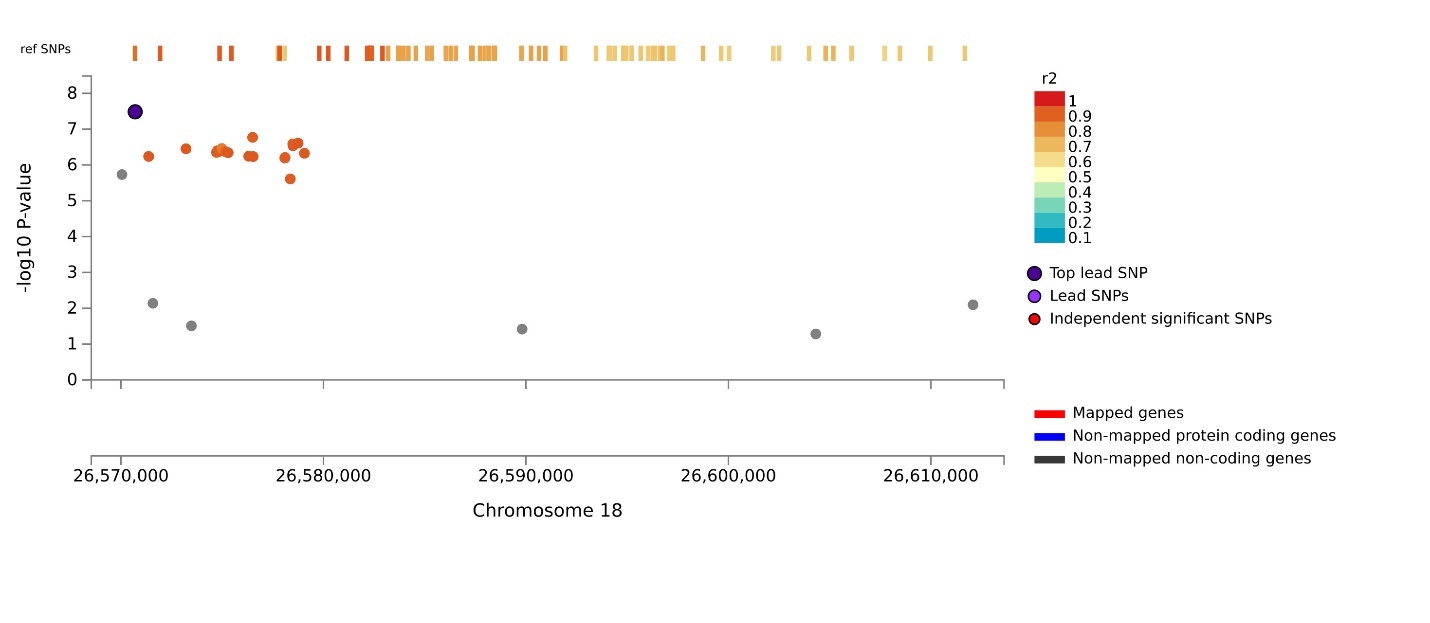


Locus 42 AA_EA:


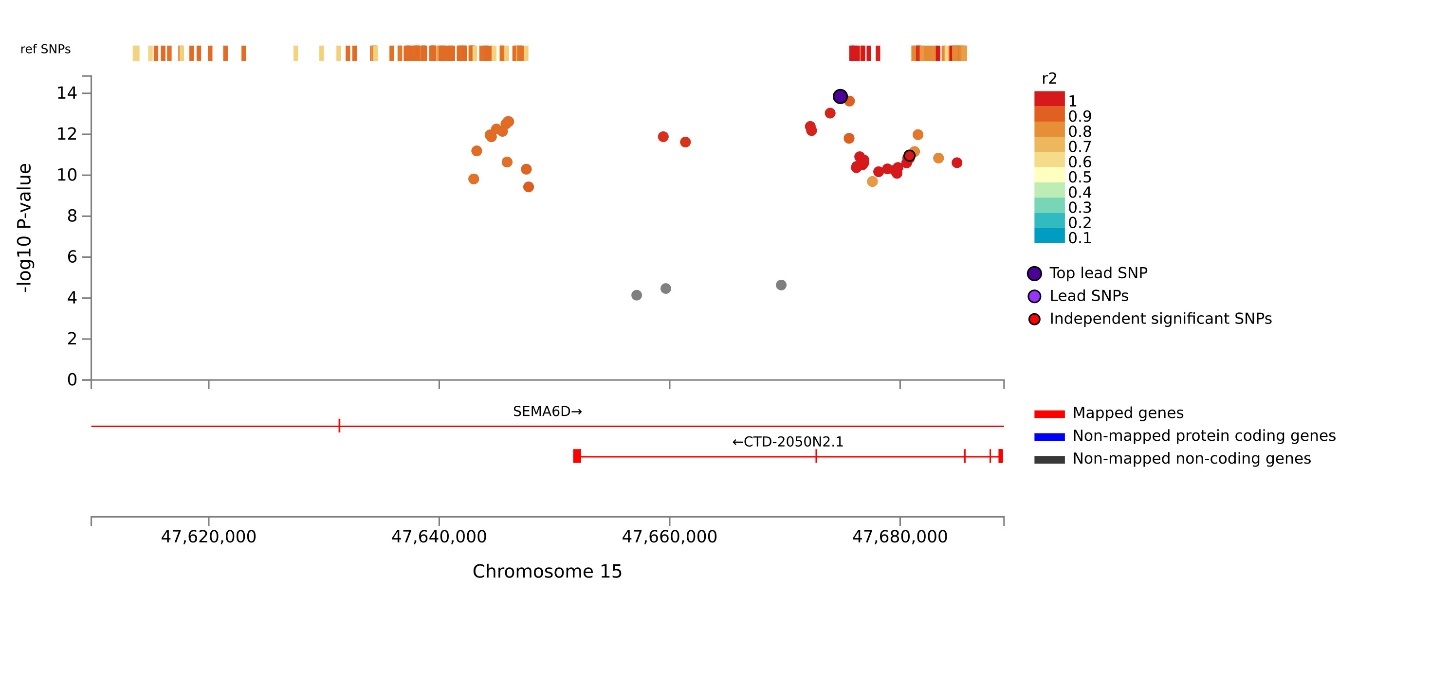


Locus 42 AA_EA_LA:


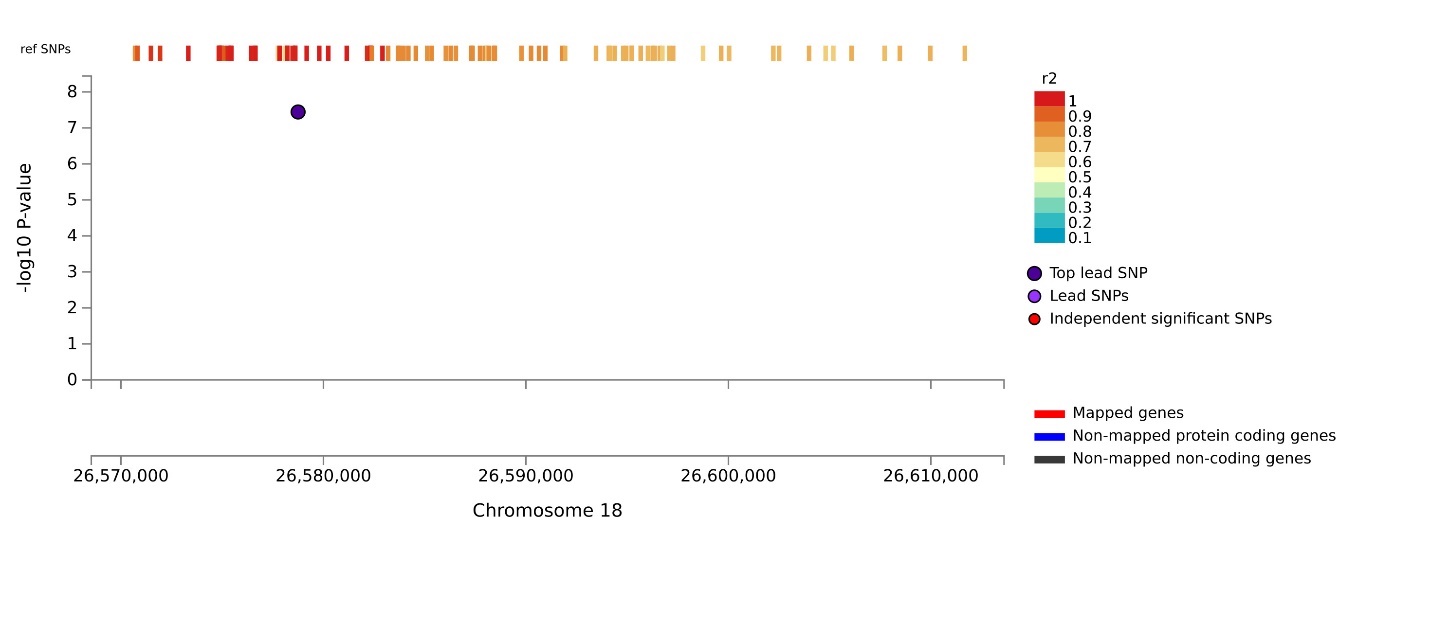


Locus 43 AA_EA:

Locus 43 EA:

Locus 44 AA_EA:

Locus 45 EA_LA:

Locus 45 EA:

**Supplemental Figure 3**: Manhattan plots of gene-based analyses. A: EA; B: AA; C: LA; D: meta-analysis of AA and EA; E: meta-analysis of EA and LA; F: meta-analysis of AA, EA, and LA.

A: EA

B: AA

C: LA

D: meta-analysis of AA and EA

E: meta-analysis EA and LA

F: meta-analysis of AA, EA, and LA
