# Supplementary material for: Genome-wide meta-analyses of cross substance use disorders in European, African, and Latino ancestry populations
Source: Research Square preprint supplement (doi:10.21203/rs.3.rs-3955955/v1), 2024-07-16
Supplement: Supplementary file 2 [file e4a5d55e13025bf09aac0de0.docx]

**Online Methods**

**Meta-analysis**

For each SUD GWAS, we first removed all palindromic variants (e.g., A/T or C/G variants) due to strand ambiguity. We then retained variants with the same rs names, reference alleles, and alternative alleles as those in the 1000 Genomes Project1. There were two GWAS of EA and AA OUD2,3, EA NUD4,5, AA AUD6,7; therefore, they were meta-analyzed first to get one GWAS for each SUD in each ancestry population. All meta-analyses were performed using Metal8 weighted by sample sizes. For each cross-SUDs and cross-ancestry meta-analysis, we only retained variants with the same directions of effects. Meta-analysis results were uploaded to FUMA (Functional mapping and annotation of genetic associations)9 to identify independent lead variants and significant loci. European, African, and American mixed samples from the 1000 Genomes project1 were used to determine linkage disequilibrium (LD) for EA, AA, and LA samples, respectively. FUMA9 was also used to make Manhattan and LocusZoom plots. Allele frequencies of each variants were obtained from the 1000 Genomes Projects1 by using ANNOVAR10.

**Gene-based analysis**

MAGMA11 was used to perform gene-based analyses. Only genes (N=33,761) having median transcripts per kilobase million (TPM) >0 in at least one of 13 brain tissues from GTEx12 were included in gene-based analyses. Within each ancestry population, we used the top χ2 statistic option in MAGMA11 to perform the gene-based analysis. Cross-ancestry gene-based analyses were performed by using the meta-analysis method in MAGMA11 with gene-based analysis results from each ancestry population as the input files. Fixed effect meta-analysis weighted by sample sizes were used. Genes only presented in the analysis results of only one ancestry population were excluded.

**Mapping significant variants to genes**

Three strategies were used to map significant variants to genes. The first one was positional mapping using FUMA9, i.e., whether a significant variant is located within a gene (±1 kb from transcription start and end sites). Gene annotations were obtained from ENSEMBL gene v9213 by using ANNOVAR10. The second strategy was eQTL mapping, i.e., whether a significant variant is an eQTL of a gene (cis-eQTL only). FUMA9 was also used to perform eQTL mapping and eQTL datasets from PsychENCODE14 were used. The third strategy is chromatin interaction mapping, i.e., whether a significant variant contacts a gene by chromosomal looping (within 2 Mb). We used the Hi-C datasets from human germinal zone and cortical plates15 and performed loop calling using HiCorr16 and DeepLoop17. The top 300K loops within 2 Mb were used to find loop-directed variant-gene pairs. Genes mapped by any of these strategies were included in gene prioritization.

**Gene prioritization**

Since genes mapped include those close in physical proximity to SUD-associated genes but may not be biological relevance to SUDs; therefore, we used a series of steps to prioritize mapped genes. First, we checked whether mapped genes were in SUD-related pathways (alcoholism, amphetamine addiction, cocaine addiction, morphine addiction, nicotine addiction, dopaminergic synapse, GABAergic synapse, glutamatergic synapse, and MAPK signaling) defined by the Kyoto Encyclopedia of Genes and Genomics (KEGG: [https://www.genome.jp/kegg/](about:blank)). As part of these pathways were derived from animal studies and different genes with similar functions may cause SUDs in human; therefore, we also checked whether any of prioritized genes belongs to the same gene families as those in KEGG SUDs pathways, or directly interacts with genes in the pathways. Gene-gene interactions were obtained from the STRING database ([https://stringdb.org/](about:blank))18. We only retained genes with high confidence interactions (i.e., having confidence score ≥0.7 or obtained from high-throughput laboratory experiments and previous knowledge in databases). Finally, we checked the GWAS catalog19 and retained genes that were associated with psychiatric traits, brain measurements, and brain functions. Gene identified by any of these steps were prioritized.

**Brain dissection and cell type enrichment analyses**

We performed four enrichment analyses to identify: 1) in which brain dissections prioritized genes were highly expressed, 2) in which brain dissections prioritized genes were lowly expressed, 3) in which brain cell types prioritized genes were highly expressed, and 4) in which brain cell types prioritized genes were lowly expressed. We used the single-cell RNA sequencing data from 105 dissections and 461 cell types generated by the BRAIN Initiative cell census network20; and to be consistent with the original publication, we used the same naming system. For the first enrichment analysis, for each gene, we calculated the mean and standard error (SE) of RNA expression across all dissections; then we tested whether the expression of that gene in a particular dissection was significantly higher than the mean expression (>mean + 1.645*SE; α=0.05). Each gene in each dissection was labeled as either highly or not highly expressed. Then, for each dissection, we tested whether the frequency of highly expressed prioritized genes was significantly greater than the frequency in all other genes using the Fisher’s exact test. Benjamini-Hochberg false discovery rate21 was used to correct for multiple testing. The same procedure was performed in the second enrichment analysis except we tested whether the gene expression was significantly lower than the mean expression (<mean - 1.645*SE; α=0.05). The other two enrichment analyses used the same procedure but were testing cell types.

**Heritability estimation and calculating heritability explained by SUD-concordant variants**

We calculated heritability using LDSc22,23 model implemented in LDAK (v5.2)24,25. SNP heritability was estimated on the observed scale. We limited the heritability estimation to EA samples due to the lack of access to individual level data for AA and LA samples to estimate LD patterns. Although publicly available reference panels for AA and LA samples exist but due to differences in admixture proportions, the LD patterns may not have been a good proxy of AA and LA samples studied. To estimate heritability in EA samples, we made a European ancestry reference panel by including Finnish samples from the 1000 Genomes project1 following the instruction of LDAK24,25 as data from the FinnGen consortium were included in our analyses. We estimated heritability by using all available variants and SUD-concordant variants only, respectively, with latter divided by former as the heritability explained by SUD-concordant variants.

**Calculating genetic correlations**

Complex Traits Genetics Virtual Lab (CTG-VL [https://vl.genoma.io/data](about:blank), accessed 04/26/2023) was used to perform genetic correlation analyses using LD score regression23. For genetic correlations among different SUDs, we uploaded each SUD GWAS to CTG-VL and calculated genetic correlations. All variants from each SUD GWAS were included. We also performed genetic correlations between cross-SUD meta-analysis (only SUD-concordant variants were included) and other publicly available GWAS, which are available at CGT-VL. Significant correlations were determined by using Bonferroni correction. Again, genetic correlation analyses were limited to EA.

**Polygenic scores (PGS) analyses**

We used samples from the All of Us research program and the Indiana Biobank as the target datasets to perform PGS analyses. Genetically determined EA, AA, and LA samples from All of Us version 7.1 were used; variants with a population-specific allele frequency >1% or a population-specific allele count >100 in any ancestry population were included. SUD cases in All of Us were those determined as having substance abuse (SNOMED code 66214007) and controls were everyone else. Indiana Biobank data processing and QC were described previously26,27. Briefly, Indiana Biobank liver diseases cohort and SUDs cohort were genotyped using Illumina Infinium Global Screening Array (GSA, Illumina, San Diego, CA) by Regeneron (Tarrytown, NY) and Illumina Infinium Global Diversity Array (GDA, Illumina) by Sampled (Piscataway, NJ), respectively. Variants with palindromic alleles, missing rate >5%, MAF <3%, and HWE P-value < 0.0001 were excluded. Principal components (PC) of population stratification were calculated using Eigenstrat28. Based on the first two PCs, those clustered with the European and African reference samples from the 1000 Genomes Project1 were grouped as EA and AA samples, respectively. Both cohorts were imputed using the Michigan Imputation Server29 separately with the 1000 Genomes project1 as the reference panel. Variants with imputation INFO <0.3 or MAF <0.01 were excluded. SUDs cases were determined based ICD9/10 codes and those not having any SUD were considered as controls. In both All of Us and the Indiana Biobank, for those related samples determined by identify by descent (first and second degrees), we only kept one from each family by first selecting those having SUDs and/or higher call rate and if they were all controls or having similar call rate, then randomly selected one from each family.

In EA, we used variants with concordant effects across SUDs to calculate PGS. Using the EA meta-analysis results as the discovery dataset, we estimated posterior effect sizes of concordant variants using PRS-CS30 with European samples from the 1000 Genomes project1 as the reference panel. For AA and LA, in addition to the meta-analyses results from AA and LA, respectively, EAs results were also used as the discovery datasets to increase the statistical power, but only variants having concordant effects within AA and LA (regardless of their directions of effects in EA), respectively, were included in calculating PGS. Combined posterior effect sizes across different populations were estimated by using PRS-CSx (i.e., meta-analysis results from PRS-CSx)31. African (for AA) and American Mixed (for LA) samples from the 1000 Genomes Project1 were used as the reference panels. In All of US, PGS were calculated as the sum of numbers of alleles times posterior effect sizes. If a genotype was not successfully sequenced, then it was imputed as the mean allele counts based on the allele frequencies by using PLINK32,33. In the Indiana Biobank, PGS were calculated as the sum of imputed dosages times posterior effect sizes.

All PGS were calculated by using PLINK32,33. For each PGS calculation, since the exact same set of variants, effective allele, and their effect sizes were used in both All of Us and the Indiana Biobank; therefore, PGS from both All of Us and the Indiana Biobank were combined to identify those 5% individuals with the highest PGS. Logistic regression was used with sex (not used in sex-stratified analyses), age, and the first 10 PCs as covariates. For SUDs cases, age was defined as the age of the first diagnosis; for controls, age was defined as the age at the last interview. Additionally, an array indicator was included as a covariate in the analyses of the Indiana Biobank data.

**Drug repurposing**

We searched the Drug Gene Interaction Database (DGIdb, v4.2.0, [https://www.dgidb.org/](about:blank), accessed 05/01/2023)34 to identify drugs targeting prioritized genes. We limited to those drugs approved by the Food and Drug Administration. The Anatomical Therapeutic Chemical (ATC) codes of drugs were obtained from the KEGG: [https://www.genome.jp/kegg/drug/](about:blank)). We then selected five repurposable drugs based on the four criteria described in the main text. Since these five drugs belong to three ATC level 4 classes (N03AX, N06AA, and N06BA), we derived three cohorts corresponding to the three ATC classes using the active comparator design. Data were obtained from Optum® Clinformatics®, which is a longitudinal database derived from medical claims and pharmacy claims data of a large national insurer cohort ([https://www.optum.com/business/life-sciences/commercial-analytics/managed-markets.html](about:blank)). In each cohort, individuals with pharmacy claims belonging to the corresponding ATC class were identified with the year of drug initiation between 2008 to 2021. All individuals were 21 years or older. We defined the clock-0 as the first exposure date of repurposable drug or comparator and we included individuals with >365 days of enrollment prior to the clock-0. Individuals concurrently initiated both repurposable drug and comparator on clock-0 were excluded. The demographics and comorbidities for the three cohorts were shown in Table **Supplemental Table 28**.

In the active comparator design, the “repurposable drugs” were those five drugs identified and the comparators were the remaining drugs in the corresponding repurposable drugs’ ATC level 4 classes. The outcome was time from clock-0 to diagnosis of SUDs. Individuals without an outcome were censored on the earliest date of drug discontinuation (i.e., without exposure for >60 days), enrollment discontinuation, or concurrent of initial of repurposable drug and comparator. We used the R package comorbidity to define the outcome and comorbidities. Cox proportional hazard models were used to investigate the association between repurposable drugs and the outcome. The Cox proportional models were adjusted for age at clock-0, sex, race, and comorbidities listed in **Supplemental Table 28**., and stratified by the year of drug initiation.

**References**

1. Auton, A.*, et al.* A global reference for human genetic variation. *Nature* **526**, 68-74 (2015).

2. Kember, R.L.*, et al.* Cross-ancestry meta-analysis of opioid use disorder uncovers novel loci with predominant effects in brain regions associated with addiction. *Nature Neuroscience* **25**, 1279-1287 (2022).

3. Polimanti, R.*, et al.* Leveraging genome-wide data to investigate differences between opioid use vs. opioid dependence in 41,176 individuals from the Psychiatric Genomics Consortium. *Mol Psychiatry* **25**, 1673-1687 (2020).

4. Watanabe, K.*, et al.* A global overview of pleiotropy and genetic architecture in complex traits. *Nat Genet* **51**, 1339-1348 (2019).

5. Quach, B.C.*, et al.* Expanding the genetic architecture of nicotine dependence and its shared genetics with multiple traits. *Nat Commun* **11**, 5562 (2020).

6. Walters, R.K.*, et al.* Transancestral GWAS of alcohol dependence reveals common genetic underpinnings with psychiatric disorders. *Nat Neurosci* **21**, 1656-1669 (2018).

7. Kranzler, H.R.*, et al.* Genome-wide association study of alcohol consumption and use disorder in 274,424 individuals from multiple populations. *Nature Communications* **10**, 1499 (2019).

8. Willer, C.J., Li, Y. & Abecasis, G.R. METAL: fast and efficient meta-analysis of genomewide association scans. *Bioinformatics* **26**, 2190-2191 (2010).

9. Watanabe, K., Taskesen, E., van Bochoven, A. & Posthuma, D. Functional mapping and annotation of genetic associations with FUMA. *Nat Commun* **8**, 1826 (2017).

10. Wang, K., Li, M. & Hakonarson, H. ANNOVAR: functional annotation of genetic variants from high-throughput sequencing data. *Nucleic Acids Research* **38**, e164-e164 (2010).

11. de Leeuw, C.A., Mooij, J.M., Heskes, T. & Posthuma, D. MAGMA: generalized gene-set analysis of GWAS data. *PLoS Comput Biol* **11**, e1004219 (2015).

12. Lonsdale, J.*, et al.* The Genotype-Tissue Expression (GTEx) project. *Nature Genetics* **45**, 580-585 (2013).

13. Cunningham, F.*, et al.* Ensembl 2022. *Nucleic Acids Research* **50**, D988-D995 (2021).

14. Wang, D.*, et al.* Comprehensive functional genomic resource and integrative model for the human brain. *Science* **362**(2018).

15. Won, H.*, et al.* Chromosome conformation elucidates regulatory relationships in developing human brain. *Nature* **538**, 523-527 (2016).

16. Lu, L.*, et al.* Robust Hi-C Maps of Enhancer-Promoter Interactions Reveal the Function of Non-coding Genome in Neural Development and Diseases. *Molecular Cell* **79**, 521-534.e515 (2020).

17. Zhang, S.*, et al.* DeepLoop robustly maps chromatin interactions from sparse allele-resolved or single-cell Hi-C data at kilobase resolution. *Nature Genetics* **54**, 1013-1025 (2022).

18. Szklarczyk, D.*, et al.* The STRING database in 2021: customizable protein-protein networks, and functional characterization of user-uploaded gene/measurement sets. *Nucleic Acids Res* **49**, D605-d612 (2021).

19. Sollis, E.*, et al.* The NHGRI-EBI GWAS Catalog: knowledgebase and deposition resource. *Nucleic Acids Res* **51**, D977-d985 (2023).

20. Siletti, K.*, et al.* Transcriptomic diversity of cell types across the adult human brain. *Science* **382**, eadd7046 (2023).

21. Benjamini, Y. & Hochberg, Y. Controlling the False Discovery Rate - a Practical and Powerful Approach to Multiple Testing. *J R Stat Soc B* **57**, 289-300 (1995).

22. Finucane, H.K.*, et al.* Partitioning heritability by functional annotation using genome-wide association summary statistics. *Nature Genetics* **47**, 1228-+ (2015).

23. Bulik-Sullivan, B.K.*, et al.* LD Score regression distinguishes confounding from polygenicity in genome-wide association studies. *Nat Genet* **47**, 291-295 (2015).

24. Speed, D. & Balding, D.J. SumHer better estimates the SNP heritability of complex traits from summary statistics. *Nat Genet* **51**, 277-284 (2019).

25. Speed, D., Holmes, J. & Balding, D.J. Evaluating and improving heritability models using summary statistics. *Nat Genet* **52**, 458-462 (2020).

26. Lai, D.*, et al.* Gene-based polygenic risk scores analysis of alcohol use disorder in African Americans. *Transl Psychiatry* **12**, 266 (2022).

27. Lai, D.*, et al.* Associations between alcohol use disorder polygenic score and remission in participants from high-risk families and the Indiana Biobank. *Alcohol: Clinical and Experimental Research* **n/a**.

28. Price, A.L.*, et al.* Principal components analysis corrects for stratification in genome-wide association studies. *Nat Genet* **38**, 904-909 (2006).

29. Das, S.*, et al.* Next-generation genotype imputation service and methods. *Nat Genet* **48**, 1284-1287 (2016).

30. Ge, T., Chen, C.Y., Ni, Y., Feng, Y.A. & Smoller, J.W. Polygenic prediction via Bayesian regression and continuous shrinkage priors. *Nat Commun* **10**, 1776 (2019).

31. Ruan, Y.*, et al.* Improving polygenic prediction in ancestrally diverse populations. *Nature Genetics* **54**, 573-580 (2022).

32. Chang, C.C.*, et al.* Second-generation PLINK: rising to the challenge of larger and richer datasets. *Gigascience* **4**, 7 (2015).

33. Purcell, S.*, et al.* PLINK: a tool set for whole-genome association and population-based linkage analyses. *Am J Hum Genet* **81**, 559-575 (2007).

34. Freshour, S.L.*, et al.* Integration of the Drug-Gene Interaction Database (DGIdb 4.0) with open crowdsource efforts. *Nucleic Acids Res* **49**, D1144-D1151 (2021).
